# Supplementary material for: Through network pharmacology and molecular docking to explore the underlying mechanism of Artemisia annua L. treating in abdominal aortic aneurysm
Source: Frontiers journal article supplement (doi:10.3389/fphys.2022.1034014), 2022-10-20
Supplement: Data_Sheet_1.ZIP [file Data_Sheet_1.ZIP]

## Sheet: results
mapk8	luteolin	-9.9
mapk8	quercetin	-9.7
mapk8	kaempferol	-9.2
RELA	luteolin	-9.2
RELA	quercetin	-9.2
AKT1	Isorhamnetin	-9.1
mapk8	Isorhamnetin	-9.1
AKT1	quercetin	-8.9
AKT1	luteolin	-8.7
CCND1	luteolin	-8.7
FOS	luteolin	-8.7
FOS	quercetin	-8.7
mapk8	Artemetin	-8.7
AKT1	kaempferol	-8.6
CCND1	Isorhamnetin	-8.6
esr1	kaempferol	-8.6
esr1	quercetin	-8.6
CCND1	quercetin	-8.5
esr1	Isorhamnetin	-8.5
esr1	luteolin	-8.5
FOS	Isorhamnetin	-8.5
CCND1	kaempferol	-8.3
FOS	kaempferol	-8.3
MAPK14	quercetin	-8.2
FOS	Artemetin	-8.1
MAPK14	luteolin	-8.1
RELA	Isorhamnetin	-8
myc	luteolin	-7.9
TP53	quercetin	-7.9
MAPK1	kaempferol	-7.8
MAPK1	quercetin	-7.8
myc	Isorhamnetin	-7.8
myc	kaempferol	-7.8
myc	quercetin	-7.8
RELA	kaempferol	-7.8
TP53	luteolin	-7.8
MAPK14	Isorhamnetin	-7.7
MAPK1	luteolin	-7.7
TP53	kaempferol	-7.7
MAPK14	kaempferol	-7.6
AKT1	Artemetin	-7.5
MAPK1	Isorhamnetin	-7.5
esr1	Artemetin	-7.4
TP53	Isorhamnetin	-7.3
RELA	Artemetin	-7.2
MAPK1	Artemetin	-7
myc	Artemetin	-7
MAPK14	Artemetin	-6.8
TP53	Artemetin	-6.6
CCND1	Artemetin	-6.3
2022-06-01	luteolin	-5.6
2022-06-01	Isorhamnetin	-5.4
2022-06-01	kaempferol	-5.4
2022-06-01	Artemetin	-5.3
2022-06-01	quercetin	-5.3
