# Supplementary material for: Through network pharmacology and molecular docking to explore the underlying mechanism of Artemisia annua L. treating in abdominal aortic aneurysm
Source: Front Physiol. 2022 Oct 20;13:1034014. doi: 10.3389/fphys.2022.1034014 (PMC9634740; doi:10.3389/fphys.2022.1034014)
Supplement: Supplementary file 1 [file Table2.xlsx]

## Sheet: Table-S2 The result of 2010 dis
FBN1
MYLK
MYH11
TGFBR2
TGFBR1
SMAD3
ACTA2
ELN
COL3A1
NOTCH1
TGFB2
LOX
TGFB3
PRKG1
SLC2A10
SMAD4
MMP2
IL6
FBN2
MFAP5
ACE
FOXE3
EFEMP2
NDE1
FBLN5
COL5A2
FLNA
COL5A1
MAT2A
APOE
BGN
SMAD6
MIR195
MMP9
IL1B
IL10
NKX2-5
MIR21
FAS
TLR4
ELANE
NOS3
H19
MIR15A
CRP
COL1A2
MMP14
PKD1
ROBO4
GATA5
VWF
EDN1
APOB
MIR191
COL1A1
MIR145
ENG
LIMK1
MYLK-AS1
CDKN2A
TNF
CTNNB1
SPP1
AAA1
F2
MAPK1
TNXB
TIMP2
TIMP1
MMP3
AAT1
TBX1
GATA4
LRP5
COL11A1
TBX5
MIR17
MMP12
ALDH18A1
TP53
MIR181A1
MYOCD
GTF2IRD1
KRAS
MIR126
HLA-B
PPARG
MIR23A
EGF
IL1RN
LDLR
PTEN
MMP13
ACTA2-AS1
CCL2
CDKN2B-AS1
BRAF
ALB
TSC2
BAZ1B
HLA-DRB1
MMP1
FLNB
BMP2
PTPN22
EDNRA
NOTCH3
LOC113939944
MIR122
GATA6
GTF2I
CLIP2
LTBP3
JAG1
COL2A1
BMP6
LTBP2
TSC1
AKT1
MIR29B1
LMNA
SERPINA3
SERPINA1
ACTB
SMAD2
TGFB1
NOD2
TNFRSF1A
SKI
NOTCH2
COL4A1
AEBP1
RIN2
PCSK9
APC
TLR2
MYH6
HRAS
FMR1
TBX20
REN
CST3
TNFRSF11B
STAT1
CHD7
AGTR1
PKD2
TNNI3
MYC
MTOR
CRKL
NF1
NLRP3
PTPN11
RFC2
APOA1
FGFR1
IFIH1
TBL2
DSP
ISL1
GNAS
HGD
EGFR
VEGFA
HSPG2
AAT2
SOS1
EDNRB
MLX
MIR199A1
MED12
CHST3
F5
MIR10A
B3GAT3
DNMT3A
ATP6V0A2
TGFBR3
MIR223
MTHFR
KIT
GUCY2C
DCN
MMP8
MEFV
KCNQ1
MIR150
GAA
IGF1
CDKN1C
INS
EDN3
MESP2
PIGN
IL12B
H2AC18
PLAU
ZIC3
PIK3CA
CDH1
IDUA
HLA-A
CD40LG
PRKAR1A
FGFR2
CFTR
CCND1
DLK1
STAT3
MIR34A
MEN1
LPL
MYH7
CXCL8
RB1
DDX58
NPPB
F3
CDKN2B
NSD1
ICAM1
TNNT2
MIR181B1
HES7
CTSL
RERE
LEP
FGF23
RET
SELE
IFNG
MIR106B
PLOD1
SERPINE1
BCR
KCNH1
BRCA2
GGT1
GANAB
IGF2
BRCA1
PRTN3
CASP3
VCAM1
ADIPOQ
MIR205
GLA
CTLA4
LPA
IGF2R
MIR424
SLC25A24
MT-ATP6
EP300
ATM
JAK2
ABCA1
DLL3
AGT
TPM2
MPO
GLI3
GREM1
COL4A2
CD4
NPPA
GPT
VCAN
MLXIPL
PRDM16
BGLAP
SCN5A
NRAS
ENPP1
ZMPSTE24
SRC
PYCR1
PLAT
CYP21A2
KCNJ2
CHRNG
IL2
LRP1
RAF1
MYH3
NPHP3
LZTR1
TAGLN
KDR
SRY
GJA1
TMEM67
GPC3
IL17A
CASP8
MIR483
ESR1
CETP
AR
HIF1A-AS1
MRAP
LTBP4
CD36
SDHB
HLA-DPB1
KANSL1
CALCA
ABCG8
THBD
ABCG5
MIR146A
PECAM1
SMARCA4
MAP2K1
KMT2D
SRFBP1
MIR486-1
HP
TRPV4
RYR1
CYP17A1
CFI
TTN
MIR125A
AAA2
MYBPC3
ABCC6
FOXF1
SOX10
ERBB2
MIR143
KCNH2
FGFR3
GAPDH
SERPINC1
NSMCE2
MEG3
MIR192
ADAMTS13
TLR5
DYNC2H1
NEK8
PDE11A
SEMA3E
ARID1B
LTBP1
TPO
CYP11B1
TG
MNX1
YY1AP1
STK11
HDAC9
MSH2
FN1
KLF15
CYP27B1
PAEP
CDKN1A
INSR
ACVRL1
ADA2
IGFBP3
PKHD1
IL18
KDM6A
RUNX2
KDM4C
IL4
LOC101448202
MVK
MYPN
FLT1
MUTYH
SI
BMP4
ATP7A
MAX
MGP
APOH
AAA4
NXN
PITX2
BMPR1A
ARHGAP31
CDKN1B
SOX9
MECP2
B4GALT7
MMP7
NOS2
TNFSF11
GBA
AAA3
GLB1
OFD1
PON1
CDK4
CDH5
SMTN
NT5E
CCL5
NFE2L2
MET
CNN1
DES
CTSB
ATP6V1E1
S100A12
LCN2
SLC26A2
GABRD
KCNAB2
CDKN3
FAH
GGT2
SPARC
C1S
RAI1
MSH6
GGTLC3
ARF1
FAN1
CCR6
HIF1A
TPM3
AFF4
PSTPIP1
PRODH
ACSL4
RUNX1
SST
AHDC1
RAD51
RNASEH2B
RAC1
POMC
IL12RB1
CBS
MAPK3
PDLIM1
MIR140
MIR27A
GNA11
FGF2
CD8A
H3-2
LDLRAP1
MIR93
KDM1A
SAA1
TCF4
PDE8B
KIFBP
MTRR
CFC1
NLRP12
ADAMTS4
MUC1
MAP2K2
BRF1
FOXP3
MIR25
PTH
SELP
IL1A
MTR
TGM2
ABL1
ATRX
CAGE1
PTX3
STAT5B
FKBP14
SLC20A1
LOXL1
CFH
CXCL12
SHH
RNF213
TNFRSF1B
GGCT
IFNA1
MIR26A1
F8
TAC3
IDH1
BICC1
ECE1
ENO2
SIRT1
EZH2
CSF3
ARFGEF2
PRL
PTGS2
ALK
IFNGR1
EEF1A2
HGF
AMH
CD40
IDH2
ATP7B
GH1
EPO
FOS
TLR3
FBLN2
OCA2
TIMP4
HMOX1
SELL
IGFBP1
CD34
PLG
SPTA1
NLRP7
HMGCR
CCL3
PGR
PRDM10
S100B
HSPD1
XYLT1
DLL4
FLNC
BUB1
GCG
NELFA
CASP1
POSTN
PUF60
CP
P3H1
TBX2
MIR342
MIR19A
JUN
CYP19A1
SIM1
TBX4
CAT
CANT1
CTSA
IRF5
BCL2
PHEX
GJB2
MIR423
SEMA3C
AVP
CYCS
SEMA3D
HIRA
FURIN
EHMT1
FCGR2A
PIGT
SKIV2L
BIRC3
KCNN4
MDM2
AGA
SOS2
CD44
MIR9-1
IGF1R
FOXE1
GP6
CXCR4
HESX1
XDH
ACTC1
RETN
SERPINF2
PRKCSH
GDNF
COL7A1
NOTCH4
PTPRC
SLC26A4
NAGLU
ERCC6
HMGB1
SCT
ACVR1
TREX1
SHOC2
ALG8
STS
CREB3L1
ITGAM
TIMP3
LIG4
MIR200B
HLA-DQB1
SLC12A5-AS1
LOC100506472
HNF1B
TGIF1
TSHZ1
NFATC1
CRELD1
TP63
ICOSLG
MTUS1
RHOA
ADAR
CSF2
FOXM1
SALL1
GLYAT
CGA
DEL18Q
CDH2
MICA
MBL2
MSX2
PSAP
PTCH1
YWHAE
SAMHD1
HSPA4
MIR590
USP9X
RNASEH2A
PLA2G7
CTSK
OTX2
FZD4
GALNS
PIGA
ADM
ALPP
MIR379
IBSP
RNASEH2C
MYH10
CNR1
IL6R
GZMB
DLL1
BDNF
SMO
RPS6KB1
AFF2
PACS1
TLR9
B2M
NCAM1
LAX1
COL4A5
PKD1L1
MIR196A1
IL12A
HLA-DQA1
MB
MAPT
VIM
GPT2
NRXN1
RIT1
FLCN
PAFAH1B1
MALAT1
CDH11
LTF
MIR487B
DHFR
MME
IL2RA
CSF1
CCDC151
C1R
NEK1
MIR221
THSD4
MAPK8
PAH
CXCL10
MIR214
GORAB
PRF1
MIR142
NSD2
CALB2
FBN3
RNU4ATAC
CTSD
NLRP1
A2ML1
B3GALT6
SOD1
HBB
BCL2L1
HAMP
SLC17A5
AKT2
PTHLH
MIR24-1
ANKS6
ABCC9
RELA
DSE
S100A9
NR1H4
CD79A
HAND2
BMPR2
NFIX
ETS1
CSTA
FTL
DKK1
GP1BA
GHR
MTHFD1
POMT2
IL13
CD19
HEY2
CCR5
LINC00976
CHUK
PAX3
AMMECR1
KCNE5
NFKBIA
MKS1
LIPC
FKBP6
TTR
SOD2
DVL1
U2AF1
SHBG
TRIM50
AQP1
MIR26B
RASA2
POMT1
TNFSF10
TNFRSF10A
SMARCA2
DNMT1
ACOT11
KNG1
XYLT2
IKZF1
INPP5E
LINC00540
MIR338
INVS
ACP5
MIR181A2
MIR376A1
PF4
RRAS
MIR183
CASP9
VTN
HTR2A
MIR30A
MIR505
FCGR3A
ADA
AKT3
CCL26
CREB1
CDC73
BTK
IFNB1
SLC25A6
M6PR
SOST
APPL1
PTER
SETD2
LAMB1
AMMEC
ANXA5
SUGCT
BMP1
PIGW
MIF
RBBP8
MSX1
IFNA2
FASLG
TGDS
PTH1R
SHMT1
BSG
MBP
GNRH1
PAX2
LAT2
FCGR3B
DNASE1L3
MIR675
FABP1
FKBP10
WNT1
MCL1
ALPL
HOTAIR
PPBP
CLDN3
AMT
F9
SLC34A1
IKBKB
CNMD
IL7
PRKD1
GHRH
PAX6
NDUFA9
YY1
GGCX
PROS1
MRAS
DNMT3B
COL14A1
DICER1
PIK3R1
SMARCA5
SMARCA1
SNAI2
COMP
ABCB1
AIM2
CD80
RBPJ
DOCK6
PGAP3
UBE3A
IL3
COG2
MBTPS2
GYS1
NKAP
KRT7
SLC11A1
MIR32
GLI1
PTGER4
TMPO
HSPA5
CTU2
CEP57
NR0B1
F7
C3
CAV3
TLR7
TLR1
AVPR2
F13A1
SLC6A4
DNAJB11
HSP90AA1
TLR6
FLVCR2
DMD
PVALB
IVL
TRPC3
DGCR6L
CLDN4
GPR101
CCN2
ASAH2
MIR132
RYR2
PIGM
IL15
PTGS1
SORT1
SLC13A5
PTBP3
OLR1
YWHAZ
STX1A
TYR
TEF
PIK3R2
NAMPT
XIAP
FOXG1
NPY
NFKB1
ITGA4
PKD2L1
CD274
TLR8
ADGRG6
MIR155
BCL7B
DCX
AGER
YWHAB
RUNX1T1
SERPINF1
ACP6
MRPS22
TNFSF13B
BCL6
PIEZO2
SLC13A1
NES
SEMA3A
RIPPLY2
WRN
MIRLET7B
TLR10
CYB5A
FMO5
APC2
CDK1
ABHD11-AS1
CD28
GABRA1
CGB3
NLRC4
JAK1
CCL4
NEK9
KLRK1
CTSG
CDK6
WDR19
MYD88
LOC106029311
LOC106029312
LOC106029313
PES1
CEACAM5
CD68
CD86
CD14
GPR89A
GPR89B
IRF3
NCF1
GLS
CMA1
NSUN5
BUD23
APOC3
ADCY1
STAG3
GRAP2
KMO
SLC13A2
SLC13A3
SLC13A4
SCLY
MADD
ACSM3
GPCPD1
TSKU
ZBED1
ENO1
MNT
NOP2
CRHR1
TRAF6
MIR135A1
BLOC1S1
AQP2
STAT5A
HBA2
DDX41
TUG1
CD27
KMT2B
PLOD2
COL4A3
FPGS
MIR335
NCR3
GRB2
FZD9
VIP
PAPPA
CYP11B2
CRYAA
UBE4B
MIA2
HPGD
HDAC1
PIK3CG
LIMK2
HPSE
TWIST1
STAG3L4
LOC110806262
ABCC8
KLRC1
SOX2
MIRLET7E
MIR28
PARP1
KLF4
KRT19
NSUN5P2
NSUN5P1
INO80
POM121C
UMOD
SERPINA7
IL1RAPL2
CDK2
YWHAQ
HIP1
EIF4H
NIF3L1
MXD1
ABHD11
MXD4
NSUN6
NSUN3
NSUN7
DNAJC30
GTF2IRD2
VPS37D
GALNT17
GTF2IRD2B
SPDYE1
TRIM74
TRIM73
METTL27
RCC1L
STAG3L1
TMEM270
STAG3L2
STAG3L3
SPDYE7P
LINC00851
GTF2IP1
GTF2IRD2P1
SPDYE8
GTF2IP4
SPDYE13
SPDYE12P
SPDYE15
SPDYE14
EIF4HP1
SPDYE10P
SPDYE9
WBSCR2
WBSCR23
LOC108228208
LOC108228209
CRTAP
THBS1
SERPINH1
ALDH1A2
CFLAR
HMGA2
VKORC1
MIR331
UBE2L3
STH
SNHG1
DAB2IP
AAAS
KIF3A
CACNA1C
VHL
ACTL6A
KLF2
HSPB1
EPOR
FGGY
TNFRSF8
CAMP
IFT88
FLT3
PVT1
CAMTA1
GBP1
IL5
MYBPH
CXCL1
PCYT1A
DDX21
MIR363
PIGV
AHSG
TRPV1
DDIT3
LOC107988032
NSD3
PROKR2
GJC2
PIK3CB
GAS5
HPD
RPGRIP1L
TERC
PDGFB
AGTR2
KISS1
CFAP74
P4HB
EGR1
ATP6V1B2
TNFRSF13B
TFAP2A
MYOM2
GBX2
TNFRSF11A
BPI
TULP4
MX1
MCPH1
TNFRSF10B
UCA1
ANGPT1
BMP15
IRF6
RPS3A
NPHP1
PON2
NPHP4
SYNE1
CDK5RAP2
GNA15
BANF1
ADD1
SOX11
TBX6
HPRT1
FOXD2-AS1
MBD5
LCAT
LGALS3
ADAM17
FBLN1
LMOD3
DPP4
ERG
HES4
ANGPT2
FCGR2B
KRT20
GPBAR1
TYMS
TNC
FGA
ARX
TH
PDGFRB
EIF4EBP1
CCAT1
TBK1
APOC2
NPHS2
LIG3
IFI27
PIK3CD
BLK
LEF1
SALL3
GFAP
CC2D2A
PCAT1
CEP290
MEPE
CCND2
JAK3
ARL13B
BRD4
ITGB3
LBR
TAZ
PAX5
LAMP2
PRKCZ
CXCR2
XBP1
NOD1
CDIPT
NOX1
P3H2
CFAP47
IFT20
RBFOX3
OPTN
NETO1
LAMA1
MTUS2
ECEL1
TSPY1
BHMT
BCL11B
MIR29A
GNAI3
RAPSN
RAD21
CCND3
CD22
IRF4
CTAG1B
HNRNPK
KCNJ8
SLC34A3
GALR1
CHD5
SERPINB4
CASZ1
ZNF516
TTC28
PHF13
ZNF236
TWIST2
KISS1R
CCT3
AP1S1
PPIB
MUC16
IFNAR1
MAVS
LTA
PLA2G2A
COG4
RHOD
MAGEA3
CHD4
CD2AP
DOK7
BIRC2
CCL1
DIABLO
IRF7
BCL2L11
SLC4A2
SPG7
TAOK3
PSEN1
FAT4
PEPD
TF
HAX1
IGHV4-38-2
THY1
ZNF469
CALR
GSK3B
MAPK14
MYH9
NOX4
EDN2
NEB
IFNAR2
DNMT3L
KRT1
LEPQTL1
PPARGC1A
BLVRA
TACR3
TAT
PROK2
MEG8
DNAH8
HS6ST1
SMARCC1
CD1D
GSTZ1
SLC35D1
CNTN1
ITGB2
FKTN
NRXN3
MGAM
IQCB1
CARTPT
CAV1
NUP98
CD5
NEDD4
NLGN4X
LYPD1
VLDLR
SHOX
KLK1
TFEB
RSAD2
MIR186
PLAUR
GNRHR
CHRNB1
CHRND
ALOX5
TYK2
TUBG1
NEUROG1
RHEB
DNAAF4
KRT10
ETV7
OXT
CLU
FGFR4
SDC1
MFGE8
HBEGF
CX3CR1
MOCS1
GATA3
EIF4E
MAP2K7
RNASEL
CHIT1
SPON1
CTSH
CD38
ARF4
EXO1
PRR11
MIR500A
TBC1D24
BECN1
MIR1304
STAT2
COL4A4
MTHFS
CTSS
USP7
CX3CL1
KLHL41
PIGG
DLG4
NLGN3
SHANK2
DIS3
NLGN2
ANKAR
SMYD2
SRCAP
EPHX2
TUBA8
CD59
CACNB1
ERN1
PTK6
CHD3
ICMT
BMP10
KANSL2
HSPA8
PPFIA2
GRIN2B
NTF3
SLC30A8
LAMA2
FCN3
STAT6
NAPA
HLA-C
ANKH
KLHL40
PLEK
ADRB2
EFEMP1
SLC12A1
PRDM1
ERCC5
CHRNA1
MYH8
ISG15
REL
TNFRSF17
PTPN5
MIR99B
MIR485
PRKAG2
CYP2C19
FABP2
CD163
BBS4
LAMA5
NTS
BBS1
ACTA1
IL11
ASH1L
ITGB1
GRIA1
GRIA2
NLGN1
HOMER1
NRXN2
DLGAP3
PTPA
MIR499A
ANXA2
TNNI2
ADGRG1
COBL
TFAP2B
SETD5
ESR2
TUBA1A
POMGNT1
TUBB2B
TNNT3
RELN
NDEL1
KANK2
MYO18B
WDR62
PHF10
LCOR
CMIP
LPAL2
SRGAP2C
NBPF9
PISRT1
MIR455
CD247
TNFRSF13C
GRP
FOXO1
RTEL1
LAMB2
TREM1
BCHE
COL11A2
APLN
DPEP1
DBH
FOXO3
GSR
NFKB2
PIK3C2A
F2R
ADAM10
RBP4
FXN
IRF9
IFI16
APOBEC3G
SETX
CPVL
IFIT1
CYP2C9
RHO
PDGFA
KL
MIR29C
KCNMA1
SLC22A12
ALOX5AP
PTGES
MAF
TXN
NRP1
IL23A
PANX1
CYGB
MIR516A1
MAGI2
AMBP
CEACAM3
GABBR1
RIPK2
HNMT
CEBPA
RPS6
COL4A6
CENPC
HBA1
PRDX1
ITGA2B
GZMA
ABCA3
XPO1
TNS1
TPTE2
KANSL3
H4-16
IGLL5
KLLN
USF3
MFF-DT
APEX1
NPPC
IGES
DDB1
LYZ
SULT1A3
S100A8
AOC3
GRM5
BRD2
CD33
BRD3
IKZF3
AZIN1
MATN1
BST2
GZMM
SHANK1
C19orf33
CTAG1A
TP73-AS1
PDIA3P1
TEK
GPX1
ATP6AP2
CXCL2
EIF2AK3
P2RY12
TCN2
USP18
MIR29B2
ADAMTS1
DIO2
AXL
RO60
GNB3
CTSE
CCR3
TNFRSF9
ITGA5
DSPP
SNAI1
TMEM132B
NOS1
ILK
SGK1
CHST14
NAB2
PEX10
MIR125B1
SRD5A3
GCA
MIR23B
CHD1
KRT18
SALL4
KAT5
TICAM1
PMAIP1
PGAP1
MAP3K14
ADCY10
UGCG
NTN1
NF2
RELB
RNASET2
PHF8
CPZ
DNASE1L1
TRO
VIT
PROX2
BAK1
PTK2
CYP1A1
PRKCD
CXCR3
SYK
IGKC
ADCYAP1
ABCC1
MIR181B2
CD69
OSM
F12
SLC19A1
CRHR2
CXCR5
PRKAA2
TGFA
MCAM
FGF1
HDAC6
CYP27A1
HLA-DRB3
MIR34C
GSN
PPIG
ALMS1
PRDX2
RPS4XP18
NSDHL
KIAA0319L
CHI3L1
CDK5
KLKB1
GSTP1
TPSAB1
APOA2
HMOX2
RARRES2
PTGER3
PIGL
GNB1
KCNA2
CHD8
ATAD3A
CNTNAP2
SH2B3
TNFSF12
SP1
UTS2
CORIN
TMEM38B
AKR1A1
SEC62
MIRLET7F1
TBXT
ANKRD44
MNDA
VSX1
CCL20
DUT
CTAGE1
C2orf66
ANKRD44-IT1
ANKRD44-AS1
ENSG00000225979
ENSG00000259705
RNU6-1032P
lnc-MYEF2-7
ENSG00000274654
piR-39858-205
lnc-RBBP8-10
MN297752
piR-55194-168
LOC105373824
WWOX
AHCY
PTGER2
FHIT
CCL22
TNFAIP6
COL6A1
CYBA
PLCB4
TSPYL2
BIRC5
PROCR
APP
IL1RL1
MIR193A
LTC4S
IL2RB
CYSLTR1
ADORA1
PRKCB
PROC
CCR2
FGF7
ADORA2A
CCL11
PEX11B
PXDN
ENTPD1
FABP12
GDF2
CTTN
DCDC2
SPI1
MFN2
EFTUD2
UCN2
CXCL5
PLA2G10
CARD8
CYLD
PDE4D
ANGPTL2
CPB2
SERBP1
MIR30B
PPIA
HCRT
MBD6
NQO1
RETNLB
S1PR1
INTS6
IL22
ANOS1
FOLH1
FST
PTGER1
RIPK3
HOXA4
PMM2
LTB4R
MMP10
CASP4
ALDH9A1
CEP83
TAP2
FHL1
COG1
ALDH2
AIF1
MIR516A2
MIR1260A
PIGO
PGAP2
PTPN1
SDC2
CNTN5
DSCAM
CYBB
CIDEA
TDRD10
WNT7A
TRIM25
ALPI
S1PR3
DYNC1H1
EML1
SELENOP
AGL
IKBKG
CXCL9
FCGR1A
NNMT
SERPINB1
HLA-DRB5
IL9R
MGLL
S1PR2
GATAD2B
DCHS1
APOM
ADCY5
SERPINA5
CIRBP
AQP3
MIR574
DKC1
MAGOHB
DSG2
PAM
CXCL11
CA1
PRDX6
GNG2
ACSS2
BHMT2
CNTN3
ENOSF1
HLA-DRB4
MIR1281
ODC1
KLF5
MIR16-1
VCL
MAOA
ADARB2
PDE4A
EMX2
CUX1
DNM2
FERMT1
KCNJ15
CELSR2
GDF7
ILF3
QTRT1
ZNF335
PSRC1
NXPH4
ZNF627
NABP2
PRPF38B
SPC24
STRIP1
PCIF1
ZNF823
LDAH
ZNF844
ZNF441
C19orf38
ZNF491
CCDC159
ZNF788P
LRP1-AS
RPL7P8
RPL18AP13
SNRPGP13
HSPD1P4
LDLR-AS1
ENSG00000258634
LINC02775
ZNF887P
LOC107987125
RF00017-7861
ENSG00000287357
lnc-SPC24-1
piR-52364
lnc-KCNJ15-2
lnc-MYBPHL-1
ENSG00000244716
piR-43107-137
ENSG00000278192
RF00951-157
BPNT2
ADAM8
RGS1
CMKLR1
MRC2
ADAMTSL1
RAPGEF3
AOC1
HPN
RAPGEF4
THBS2
AKR1B1
CRBN
RPSA
MFAP4
SOCS3
H3-3A
CS
SLPI
F10
H3-3B
GFI1B
MMP19
AHSP
TIE1
EFNB2
SPRY1
NANOG
ARHGAP32
RXRB
SERPINA12
SERPINA4
NFATC4
TUBB4A
TRAF3
MLC1
KLK3
MIR124-1
TNXA
UNC93B1
ZFAND2B
HLA-G
HSPB2
HBG2
MDK
GPER1
RPL5
NT5C2
RPTOR
PRDM2
SEC11B
UTS2R
MLST8
CTNNBIP1
FOSB
COX5A
LGALS1
MIR138-1
VEGFC
ADAM12
COL18A1
CA2
MIR16-2
ELAVL1
INTS5
GRM1
CALCR
ABCA4
MTF1
MPZL1
RPLP0
TERF2
NCF2
TLN1
TBXA2R
NID1
NR1H3
CACNA1D
IL6ST
OPRD1
MIR504
BMP7
FMO4
LOXL2
MIR582
CXCR6
ENOX2
ITGA1
HAPLN1
EDA2R
SLC2A9
CFL1
CXCL16
HPX
PSMC4
PCSK2
IL1R2
PDGFD
STUB1
PLCB1
APOD
TGFBI
HDAC3
SPARCL1
MAP2K5
PTENP1
YAP1
DDR1
AIFM1
IGFBP7
SLC8A1
RBFOX1
CELA2A
DYRK1B
THSD1
ANIB4
ANIB1
ANIB2
ANIB3
THAS
CORD1
DFNA58
DFNA60
DFNA18
DFNA24
DFNA32
DFNA34
DFNA21
HCHOLA4
MYP3
DFNA46
DFNA43
DFNA45
DFNA47
CNA1
DFNA16
DFNA19
DFNA27
DFNA29
DFNA30
DFNA33
DFNA35
DFNA40
DFNA42
DFNA7
OPA4
OPA5
MYP12
MYP11
DFNA49
DFNA54
DFNA31
DFNA37
DFNA53
DFNA55
DYT7
CMD1H
CMD1K
CMTX3
SPG41
NYS3
PTOS1
PARK3
SAX1
SPG19
NYS2
CMD1B
CMR1A
SPG34
CMD1Q
SPG29
NYS4
RP52
PKD3
MYP2
ALS3
LGMD1H
PKD1P6
PKD1P5
PKD1P4
PKD1P3
PKD1P2
ID2B
MCUB
PKD1P1
RP1
KCTD12
GSDME
RP9
[truncated: 10 more rows]
