# Supplementary material for: Through network pharmacology and molecular docking to explore the underlying mechanism of Artemisia annua L. treating in abdominal aortic aneurysm
Source: Front Physiol. 2022 Oct 20;13:1034014. doi: 10.3389/fphys.2022.1034014 (PMC9634740; doi:10.3389/fphys.2022.1034014)
Supplement: Supplementary file 2 [file Table3.xlsx]

## Sheet: Table-S3 The result of 117 targ
NOS2
AR
PTGS2
F7
ESR2
DPP4
SCN5A
KDR
PTGS1
ESR1
PPARG
MAPK14
GSK3B
CDK2
AKR1B1
GABRA1
GRIA2
RELA
NCF1
OLR1
PGR
IKBKB
AKT1
BCL2
TNFAIP6
JUN
CASP3
MAPK8
MMP1
STAT1
CDK1
HMOX1
CYP1A1
ICAM1
SELE
VCAM1
ALOX5
GSTP1
SLPI
ADRB2
PLAU
MAOA
KCNH2
EGFR
VEGFA
CCND1
BCL2L1
CDKN1A
CASP9
MMP2
MMP9
MAPK1
RB1
CDK4
IL6R
TP53
NFKBIA
MDM2
APP
ERBB2
MCL1
BIRC5
IL2RA
TYR
IFNG
IL4
XIAP
CD40LG
PTGES
MET
DPEP1
CA2
HIF1A
SOD2
ABCB1
VEGFC
MMP3
FOS
EGF
ODC1
CASP8
RAF1
SOD1
RUNX1T1
HSPA5
CAV1
MYC
F3
GJA1
IL1B
CCL2
PTGER3
CXCL8
PRKCB
NOS3
HSPB1
PLAT
THBD
SERPINE1
COL1A1
IL1A
MPO
NFE2L2
NQO1
PARP1
COL3A1
CXCL11
CXCL2
CLDN4
CXCL10
CHUK
SPP1
RUNX2
CTSD
IGFBP3
IGF2
PON1
