# Supplementary material for: Through network pharmacology and molecular docking to explore the underlying mechanism of Artemisia annua L. treating in abdominal aortic aneurysm
Source: Front Physiol. 2022 Oct 20;13:1034014. doi: 10.3389/fphys.2022.1034014 (PMC9634740; doi:10.3389/fphys.2022.1034014)
Supplement: Supplementary file 4 [file Table6.xlsx]

## Sheet: Table-S6 The result of Artemisi
Node1	Node2	Net	MolName
MOL002235	NOS2	target	EUPATIN
MOL002235	AR	target	EUPATIN
MOL002235	PTGS2	target	EUPATIN
MOL002235	F7	target	EUPATIN
MOL002235	ESR2	target	EUPATIN
MOL002235	DPP4	target	EUPATIN
MOL002235	SCN5A	target	EUPATIN
MOL002235	KDR	target	EUPATIN
MOL000354	NOS2	target	isorhamnetin
MOL000354	PTGS1	target	isorhamnetin
MOL000354	ESR1	target	isorhamnetin
MOL000354	AR	target	isorhamnetin
MOL000354	PPARG	target	isorhamnetin
MOL000354	PTGS2	target	isorhamnetin
MOL000354	ESR2	target	isorhamnetin
MOL000354	DPP4	target	isorhamnetin
MOL000354	MAPK14	target	isorhamnetin
MOL000354	GSK3B	target	isorhamnetin
MOL000354	CDK2	target	isorhamnetin
MOL000354	AKR1B1	target	isorhamnetin
MOL000354	F7	target	isorhamnetin
MOL000354	GABRA1	target	isorhamnetin
MOL000354	GRIA2	target	isorhamnetin
MOL000354	RELA	target	isorhamnetin
MOL000354	NCF1	target	isorhamnetin
MOL000354	OLR1	target	isorhamnetin
MOL000359	PGR	target	sitosterol
MOL004083	NOS2	target	Tamarixetin
MOL004083	PTGS1	target	Tamarixetin
MOL004083	AR	target	Tamarixetin
MOL004083	PTGS2	target	Tamarixetin
MOL004083	F7	target	Tamarixetin
MOL004083	DPP4	target	Tamarixetin
MOL004083	MAPK14	target	Tamarixetin
MOL004083	GSK3B	target	Tamarixetin
MOL004083	CDK2	target	Tamarixetin
MOL004112	NOS2	target	Patuletin
MOL004112	PTGS1	target	Patuletin
MOL004112	AR	target	Patuletin
MOL004112	PTGS2	target	Patuletin
MOL004112	F7	target	Patuletin
MOL004112	DPP4	target	Patuletin
MOL004112	CDK2	target	Patuletin
MOL000422	NOS2	target	kaempferol
MOL000422	PTGS1	target	kaempferol
MOL000422	AR	target	kaempferol
MOL000422	PPARG	target	kaempferol
MOL000422	PTGS2	target	kaempferol
MOL000422	DPP4	target	kaempferol
MOL000422	PGR	target	kaempferol
MOL000422	GABRA1	target	kaempferol
MOL000422	F7	target	kaempferol
MOL000422	RELA	target	kaempferol
MOL000422	IKBKB	target	kaempferol
MOL000422	AKT1	target	kaempferol
MOL000422	BCL2	target	kaempferol
MOL000422	TNFAIP6	target	kaempferol
MOL000422	JUN	target	kaempferol
MOL000422	CASP3	target	kaempferol
MOL000422	MAPK8	target	kaempferol
MOL000422	MMP1	target	kaempferol
MOL000422	STAT1	target	kaempferol
MOL000422	CDK1	target	kaempferol
MOL000422	HMOX1	target	kaempferol
MOL000422	CYP1A1	target	kaempferol
MOL000422	ICAM1	target	kaempferol
MOL000422	SELE	target	kaempferol
MOL000422	VCAM1	target	kaempferol
MOL000422	ALOX5	target	kaempferol
MOL000422	GSTP1	target	kaempferol
MOL000422	SLPI	target	kaempferol
MOL000449	PGR	target	Stigmasterol
MOL000449	PTGS1	target	Stigmasterol
MOL000449	PTGS2	target	Stigmasterol
MOL000449	ADRB2	target	Stigmasterol
MOL000449	AKR1B1	target	Stigmasterol
MOL000449	PLAU	target	Stigmasterol
MOL000449	MAOA	target	Stigmasterol
MOL000449	SCN5A	target	Stigmasterol
MOL000449	GABRA1	target	Stigmasterol
MOL004609	NOS2	target	Areapillin
MOL004609	AR	target	Areapillin
MOL004609	SCN5A	target	Areapillin
MOL004609	PTGS2	target	Areapillin
MOL004609	F7	target	Areapillin
MOL004609	ESR2	target	Areapillin
MOL004609	DPP4	target	Areapillin
MOL005229	NOS2	target	Artemetin
MOL005229	KCNH2	target	Artemetin
MOL005229	ESR1	target	Artemetin
MOL005229	AR	target	Artemetin
MOL005229	SCN5A	target	Artemetin
MOL005229	PPARG	target	Artemetin
MOL005229	PTGS2	target	Artemetin
MOL005229	F7	target	Artemetin
MOL005229	ESR2	target	Artemetin
MOL005229	DPP4	target	Artemetin
MOL005229	MAPK14	target	Artemetin
MOL005229	GSK3B	target	Artemetin
MOL005229	CDK2	target	Artemetin
MOL000006	PTGS1	target	luteolin
MOL000006	AR	target	luteolin
MOL000006	PTGS2	target	luteolin
MOL000006	DPP4	target	luteolin
MOL000006	RELA	target	luteolin
MOL000006	EGFR	target	luteolin
MOL000006	AKT1	target	luteolin
MOL000006	VEGFA	target	luteolin
MOL000006	CCND1	target	luteolin
MOL000006	BCL2L1	target	luteolin
MOL000006	CDKN1A	target	luteolin
MOL000006	CASP9	target	luteolin
MOL000006	MMP2	target	luteolin
MOL000006	MMP9	target	luteolin
MOL000006	MAPK1	target	luteolin
MOL000006	RB1	target	luteolin
MOL000006	CDK4	target	luteolin
MOL000006	TNFAIP6	target	luteolin
MOL000006	JUN	target	luteolin
MOL000006	IL6R	target	luteolin
MOL000006	CASP3	target	luteolin
MOL000006	TP53	target	luteolin
MOL000006	NFKBIA	target	luteolin
MOL000006	MDM2	target	luteolin
MOL000006	APP	target	luteolin
MOL000006	MMP1	target	luteolin
MOL000006	ERBB2	target	luteolin
MOL000006	PPARG	target	luteolin
MOL000006	HMOX1	target	luteolin
MOL000006	ICAM1	target	luteolin
MOL000006	MCL1	target	luteolin
MOL000006	BIRC5	target	luteolin
MOL000006	IL2RA	target	luteolin
MOL000006	TYR	target	luteolin
MOL000006	IFNG	target	luteolin
MOL000006	IL4	target	luteolin
MOL000006	GSTP1	target	luteolin
MOL000006	XIAP	target	luteolin
MOL000006	CD40LG	target	luteolin
MOL000006	PTGES	target	luteolin
MOL000006	MET	target	luteolin
MOL007274	NOS2	target	Skrofulein
MOL007274	PTGS1	target	Skrofulein
MOL007274	SCN5A	target	Skrofulein
MOL007274	PTGS2	target	Skrofulein
MOL007274	DPP4	target	Skrofulein
MOL007401	NOS2	target	Cirsiliol
MOL007401	SCN5A	target	Cirsiliol
MOL007401	PTGS2	target	Cirsiliol
MOL007401	F7	target	Cirsiliol
MOL007401	DPP4	target	Cirsiliol
MOL007404	NOS2	target	vitexin_qt
MOL007404	PTGS1	target	vitexin_qt
MOL007404	ESR1	target	vitexin_qt
MOL007404	AR	target	vitexin_qt
MOL007404	PPARG	target	vitexin_qt
MOL007404	PTGS2	target	vitexin_qt
MOL007404	DPP4	target	vitexin_qt
MOL007404	MAPK14	target	vitexin_qt
MOL007404	GSK3B	target	vitexin_qt
MOL007404	CDK2	target	vitexin_qt
MOL007404	DPEP1	target	vitexin_qt
MOL007412	NOS2	target	DMQT
MOL007412	AR	target	DMQT
MOL007412	SCN5A	target	DMQT
MOL007412	PTGS2	target	DMQT
MOL007412	F7	target	DMQT
MOL007412	DPP4	target	DMQT
MOL007415	KCNH2	target	[(2S)-2-[[(2S)-2-(benzoylamino)-3-phenylpropanoyl]amino]-3-phenylpropyl] acetate
MOL007415	PTGS2	target	[(2S)-2-[[(2S)-2-(benzoylamino)-3-phenylpropanoyl]amino]-3-phenylpropyl] acetate
MOL007423	NOS2	target	6,8-di-c-glucosylapigenin_qt
MOL007423	PTGS1	target	6,8-di-c-glucosylapigenin_qt
MOL007423	ESR1	target	6,8-di-c-glucosylapigenin_qt
MOL007423	AR	target	6,8-di-c-glucosylapigenin_qt
MOL007423	PPARG	target	6,8-di-c-glucosylapigenin_qt
MOL007423	PTGS2	target	6,8-di-c-glucosylapigenin_qt
MOL007423	CA2	target	6,8-di-c-glucosylapigenin_qt
MOL007423	DPP4	target	6,8-di-c-glucosylapigenin_qt
MOL007423	MAPK14	target	6,8-di-c-glucosylapigenin_qt
MOL007423	GSK3B	target	6,8-di-c-glucosylapigenin_qt
MOL007423	CDK2	target	6,8-di-c-glucosylapigenin_qt
MOL007423	DPEP1	target	6,8-di-c-glucosylapigenin_qt
MOL007424	RELA	target	artemisinin
MOL007424	VEGFA	target	artemisinin
MOL007424	CDK4	target	artemisinin
MOL007424	HIF1A	target	artemisinin
MOL007424	SOD2	target	artemisinin
MOL007424	ABCB1	target	artemisinin
MOL007424	GSTP1	target	artemisinin
MOL007424	VEGFC	target	artemisinin
MOL007426	GABRA1	target	deoxyartemisinin
MOL000098	PTGS1	target	quercetin
MOL000098	AR	target	quercetin
MOL000098	PPARG	target	quercetin
MOL000098	PTGS2	target	quercetin
MOL000098	DPP4	target	quercetin
MOL000098	AKR1B1	target	quercetin
MOL000098	KCNH2	target	quercetin
MOL000098	SCN5A	target	quercetin
MOL000098	ADRB2	target	quercetin
MOL000098	MMP3	target	quercetin
MOL000098	F7	target	quercetin
MOL000098	GABRA1	target	quercetin
MOL000098	RELA	target	quercetin
MOL000098	EGFR	target	quercetin
MOL000098	AKT1	target	quercetin
MOL000098	VEGFA	target	quercetin
MOL000098	CCND1	target	quercetin
MOL000098	BCL2	target	quercetin
MOL000098	BCL2L1	target	quercetin
MOL000098	FOS	target	quercetin
MOL000098	CDKN1A	target	quercetin
MOL000098	CASP9	target	quercetin
MOL000098	PLAU	target	quercetin
MOL000098	MMP2	target	quercetin
MOL000098	MMP9	target	quercetin
MOL000098	MAPK1	target	quercetin
MOL000098	EGF	target	quercetin
MOL000098	RB1	target	quercetin
MOL000098	TNFAIP6	target	quercetin
MOL000098	JUN	target	quercetin
MOL000098	IL6R	target	quercetin
MOL000098	CASP3	target	quercetin
MOL000098	TP53	target	quercetin
MOL000098	NFKBIA	target	quercetin
MOL000098	ODC1	target	quercetin
MOL000098	CASP8	target	quercetin
MOL000098	RAF1	target	quercetin
MOL000098	SOD1	target	quercetin
MOL000098	MMP1	target	quercetin
MOL000098	HIF1A	target	quercetin
MOL000098	STAT1	target	quercetin
MOL000098	RUNX1T1	target	quercetin
MOL000098	CDK1	target	quercetin
MOL000098	HSPA5	target	quercetin
MOL000098	ERBB2	target	quercetin
MOL000098	HMOX1	target	quercetin
MOL000098	CAV1	target	quercetin
MOL000098	MYC	target	quercetin
MOL000098	F3	target	quercetin
MOL000098	GJA1	target	quercetin
MOL000098	CYP1A1	target	quercetin
MOL000098	ICAM1	target	quercetin
MOL000098	IL1B	target	quercetin
MOL000098	CCL2	target	quercetin
MOL000098	SELE	target	quercetin
MOL000098	VCAM1	target	quercetin
MOL000098	PTGER3	target	quercetin
MOL000098	CXCL8	target	quercetin
MOL000098	PRKCB	target	quercetin
MOL000098	BIRC5	target	quercetin
MOL000098	NOS3	target	quercetin
MOL000098	HSPB1	target	quercetin
MOL000098	IL2RA	target	quercetin
MOL000098	PLAT	target	quercetin
MOL000098	THBD	target	quercetin
MOL000098	SERPINE1	target	quercetin
MOL000098	COL1A1	target	quercetin
MOL000098	IFNG	target	quercetin
MOL000098	ALOX5	target	quercetin
MOL000098	IL1A	target	quercetin
MOL000098	MPO	target	quercetin
MOL000098	NCF1	target	quercetin
MOL000098	GSTP1	target	quercetin
MOL000098	NFE2L2	target	quercetin
MOL000098	NQO1	target	quercetin
MOL000098	PARP1	target	quercetin
MOL000098	COL3A1	target	quercetin
MOL000098	CXCL11	target	quercetin
MOL000098	CXCL2	target	quercetin
MOL000098	CLDN4	target	quercetin
MOL000098	CXCL10	target	quercetin
MOL000098	CHUK	target	quercetin
MOL000098	SPP1	target	quercetin
MOL000098	RUNX2	target	quercetin
MOL000098	CTSD	target	quercetin
MOL000098	IGFBP3	target	quercetin
MOL000098	IGF2	target	quercetin
MOL000098	CD40LG	target	quercetin
MOL000098	PON1	target	quercetin
