# Supplementary material for: Through network pharmacology and molecular docking to explore the underlying mechanism of Artemisia annua L. treating in abdominal aortic aneurysm
Source: Front Physiol. 2022 Oct 20;13:1034014. doi: 10.3389/fphys.2022.1034014 (PMC9634740; doi:10.3389/fphys.2022.1034014)
Supplement: Supplementary file 5 [file Table4.xlsx]

## Sheet: Table-S4 The result of GO terms
ONTOLOGY	ID	Description	GeneRatio	BgRatio	pvalue	p.adjust	qvalue	geneID	Count
BP	GO:0062197	cellular response to chemical stress	37/117	360/18866	3.85e-35	1.45e-31	6.71e-32	PTGS2/PPARG/CDK2/AKR1B1/RELA/NCF1/AKT1/BCL2/JUN/CASP3/MAPK8/CDK1/HMOX1/ALOX5/GSTP1/EGFR/MMP2/MMP9/MAPK1/TP53/MDM2/MCL1/MET/DPEP1/HIF1A/SOD2/MMP3/FOS/SOD1/CAV1/NOS3/HSPB1/MPO/NFE2L2/NQO1/PARP1/CHUK	37
BP	GO:0006979	response to oxidative stress	38/117	458/18866	1.38e-32	2.61e-29	1.21e-29	PTGS2/PTGS1/CDK2/RELA/NCF1/AKT1/BCL2/JUN/CASP3/MAPK8/STAT1/CDK1/HMOX1/ALOX5/GSTP1/EGFR/MMP2/MMP9/MAPK1/TP53/MDM2/APP/MCL1/MET/DPEP1/HIF1A/SOD2/MMP3/FOS/SOD1/NOS3/HSPB1/COL1A1/MPO/NFE2L2/NQO1/PARP1/CHUK	38
BP	GO:0010038	response to metal ion	34/117	366/18866	1.05e-30	1.32e-27	6.09e-28	PTGS2/SCN5A/NCF1/AKT1/BCL2/JUN/CASP3/MAPK8/CDK1/HMOX1/CYP1A1/ICAM1/EGFR/CCND1/CASP9/MMP9/MAPK1/CDK4/MDM2/APP/PTGES/DPEP1/CA2/HIF1A/FOS/CASP8/SOD1/HSPA5/CAV1/IL1A/NFE2L2/NQO1/PARP1/CHUK	34
BP	GO:0034599	cellular response to oxidative stress	32/117	310/18866	2.45e-30	2.31e-27	1.07e-27	CDK2/RELA/NCF1/AKT1/BCL2/JUN/MAPK8/CDK1/HMOX1/ALOX5/GSTP1/EGFR/MMP2/MMP9/MAPK1/TP53/MDM2/MCL1/MET/DPEP1/HIF1A/SOD2/MMP3/FOS/SOD1/NOS3/HSPB1/MPO/NFE2L2/NQO1/PARP1/CHUK	32
BP	GO:0000302	response to reactive oxygen species	29/117	235/18866	9.33e-30	7.04e-27	3.25e-27	CDK2/RELA/NCF1/AKT1/BCL2/JUN/CASP3/MAPK8/STAT1/CDK1/HMOX1/GSTP1/EGFR/MMP2/MMP9/MAPK1/MDM2/MET/DPEP1/SOD2/MMP3/FOS/SOD1/NOS3/COL1A1/MPO/NFE2L2/NQO1/CHUK	29
BP	GO:0032496	response to lipopolysaccharide	32/117	334/18866	2.71e-29	1.7e-26	7.87e-27	NOS2/PTGS2/MAPK14/RELA/AKT1/CASP3/MAPK8/CYP1A1/ICAM1/SELE/GSTP1/SLPI/CASP9/MAPK1/CDK4/NFKBIA/PTGES/FOS/CASP8/GJA1/IL1B/CCL2/CXCL8/NOS3/THBD/SERPINE1/IL1A/MPO/CXCL11/CXCL2/CXCL10/CHUK	32
BP	GO:0002237	response to molecule of bacterial origin	32/117	356/18866	2.09e-28	1.12e-25	5.19e-26	NOS2/PTGS2/MAPK14/RELA/AKT1/CASP3/MAPK8/CYP1A1/ICAM1/SELE/GSTP1/SLPI/CASP9/MAPK1/CDK4/NFKBIA/PTGES/FOS/CASP8/GJA1/IL1B/CCL2/CXCL8/NOS3/THBD/SERPINE1/IL1A/MPO/CXCL11/CXCL2/CXCL10/CHUK	32
BP	GO:0034614	cellular response to reactive oxygen species	23/117	170/18866	1.35e-24	6.38e-22	2.95e-22	CDK2/RELA/NCF1/AKT1/JUN/MAPK8/CDK1/EGFR/MMP2/MMP9/MAPK1/MDM2/MET/DPEP1/SOD2/MMP3/FOS/SOD1/NOS3/MPO/NFE2L2/NQO1/CHUK	23
BP	GO:2001234	negative regulation of apoptotic signaling pathway	25/117	233/18866	4.03e-24	1.69e-21	7.8e-22	AR/PTGS2/GSK3B/RELA/AKT1/BCL2/HMOX1/ICAM1/GSTP1/BCL2L1/MMP9/RB1/MDM2/MCL1/IL4/HIF1A/SOD2/CASP8/RAF1/IL1B/NOS3/HSPB1/SERPINE1/IL1A/NFE2L2	25
BP	GO:2001233	regulation of apoptotic signaling pathway	30/117	413/18866	7.06e-24	2.66e-21	1.23e-21	AR/PTGS2/GSK3B/RELA/AKT1/BCL2/MAPK8/HMOX1/ICAM1/GSTP1/BCL2L1/MMP9/RB1/TP53/MDM2/MCL1/IL4/HIF1A/SOD2/CASP8/RAF1/SOD1/CAV1/IL1B/NOS3/HSPB1/SERPINE1/IL1A/NFE2L2/PARP1	30
BP	GO:0042493	response to drug	29/117	397/18866	3.79e-23	1.3e-20	6.01e-21	NOS2/PTGS2/F7/PPARG/RELA/BCL2/CASP3/STAT1/CDK1/CYP1A1/ICAM1/KCNH2/EGFR/CCND1/CDKN1A/CDK4/TP53/MDM2/DPEP1/ABCB1/VEGFC/FOS/SOD1/HSPA5/MYC/IL1B/COL1A1/NFE2L2/CHUK	29
BP	GO:0031667	response to nutrient levels	30/117	473/18866	3.61e-22	1.14e-19	5.25e-20	PTGS2/F7/PPARG/RELA/AKT1/BCL2/JUN/MAPK8/STAT1/HMOX1/CYP1A1/ICAM1/GSTP1/ADRB2/EGFR/CCND1/CDKN1A/MAPK1/TP53/MDM2/TYR/SOD1/HSPA5/COL1A1/MPO/NFE2L2/NQO1/CXCL10/SPP1/PON1	30
BP	GO:0071241	cellular response to inorganic substance	22/117	221/18866	1.45e-20	4.1e-18	1.9e-18	PTGS2/SCN5A/CDK2/NCF1/AKT1/JUN/MAPK8/HMOX1/CYP1A1/EGFR/MMP9/MAPK1/APP/DPEP1/MMP3/FOS/SOD1/HSPA5/NFE2L2/NQO1/PARP1/CHUK	22
BP	GO:0072593	reactive oxygen species metabolic process	24/117	288/18866	1.52e-20	4.1e-18	1.9e-18	NOS2/PTGS2/MAPK14/NCF1/AKT1/BCL2/CYP1A1/ICAM1/ALOX5/GSTP1/EGFR/CDKN1A/TP53/IFNG/HIF1A/SOD2/MMP3/SOD1/CAV1/IL1B/NOS3/MPO/NFE2L2/NQO1	24
BP	GO:0097191	extrinsic apoptotic signaling pathway	22/117	230/18866	3.49e-20	8.78e-18	4.06e-18	AR/GSK3B/RELA/AKT1/BCL2/CASP3/HMOX1/ICAM1/GSTP1/BCL2L1/CASP9/IL6R/MCL1/IFNG/IL4/CASP8/RAF1/CAV1/IL1B/NOS3/SERPINE1/IL1A	22
BP	GO:0033002	muscle cell proliferation	22/117	244/18866	1.27e-19	2.78e-17	1.28e-17	PTGS2/PPARG/MAPK14/AKR1B1/AKT1/JUN/STAT1/CDK1/HMOX1/GSTP1/EGFR/CDKN1A/MMP2/MMP9/MAPK1/IL6R/MDM2/IFNG/SOD2/GJA1/NOS3/IGFBP3	22
BP	GO:2001237	negative regulation of extrinsic apoptotic signaling pathway	17/117	107/18866	1.3e-19	2.78e-17	1.28e-17	AR/GSK3B/RELA/AKT1/BCL2/HMOX1/ICAM1/GSTP1/BCL2L1/MCL1/IL4/CASP8/RAF1/IL1B/NOS3/SERPINE1/IL1A	17
BP	GO:0070482	response to oxygen levels	26/117	396/18866	1.33e-19	2.78e-17	1.28e-17	NOS2/PTGS2/F7/DPP4/PPARG/AKT1/BCL2/CASP3/HMOX1/CYP1A1/ICAM1/PLAU/VEGFA/CDKN1A/MMP2/CDK4/TP53/MDM2/HIF1A/VEGFC/RAF1/CAV1/MYC/PLAT/COL1A1/NFE2L2	26
BP	GO:0071216	cellular response to biotic stimulus	22/117	246/18866	1.52e-19	3.02e-17	1.4e-17	NOS2/MAPK14/GSK3B/RELA/AKT1/MAPK8/ICAM1/GSTP1/MAPK1/CDK4/TP53/NFKBIA/HSPA5/IL1B/CCL2/CXCL8/NOS3/SERPINE1/IL1A/CXCL11/CXCL2/CXCL10	22
BP	GO:0071248	cellular response to metal ion	20/117	193/18866	4.15e-19	7.83e-17	3.62e-17	PTGS2/SCN5A/NCF1/AKT1/JUN/MAPK8/HMOX1/CYP1A1/EGFR/MMP9/MAPK1/APP/DPEP1/FOS/SOD1/HSPA5/NFE2L2/NQO1/PARP1/CHUK	20
BP	GO:0048660	regulation of smooth muscle cell proliferation	19/117	173/18866	1.12e-18	2.02e-16	9.33e-17	PTGS2/PPARG/AKR1B1/AKT1/JUN/STAT1/HMOX1/GSTP1/EGFR/CDKN1A/MMP2/MMP9/IL6R/MDM2/IFNG/SOD2/GJA1/NOS3/IGFBP3	19
BP	GO:0048659	smooth muscle cell proliferation	19/117	175/18866	1.4e-18	2.4e-16	1.11e-16	PTGS2/PPARG/AKR1B1/AKT1/JUN/STAT1/HMOX1/GSTP1/EGFR/CDKN1A/MMP2/MMP9/IL6R/MDM2/IFNG/SOD2/GJA1/NOS3/IGFBP3	19
BP	GO:0050673	epithelial cell proliferation	26/117	453/18866	3.72e-18	6.09e-16	2.82e-16	AR/SCN5A/KDR/ESR1/PPARG/PGR/AKT1/JUN/STAT1/HMOX1/ALOX5/EGFR/VEGFA/CCND1/MAPK1/RB1/ERBB2/HIF1A/VEGFC/CAV1/MYC/F3/GJA1/CCL2/IGFBP3/IGF2	26
BP	GO:2001236	regulation of extrinsic apoptotic signaling pathway	18/117	162/18866	7.88e-18	1.24e-15	5.72e-16	AR/GSK3B/RELA/AKT1/BCL2/HMOX1/ICAM1/GSTP1/BCL2L1/MCL1/IL4/CASP8/RAF1/CAV1/IL1B/NOS3/SERPINE1/IL1A	18
BP	GO:0009314	response to radiation	25/117	447/18866	3.3e-17	4.98e-15	2.3e-15	PTGS2/MAPK14/RELA/AKT1/BCL2/CASP3/MAPK8/ICAM1/EGFR/CCND1/BCL2L1/CDKN1A/CASP9/TP53/MDM2/APP/TYR/HIF1A/FOS/HSPA5/MYC/THBD/PARP1/COL3A1/CXCL10	25
BP	GO:0071222	cellular response to lipopolysaccharide	19/117	208/18866	3.74e-17	5.42e-15	2.51e-15	NOS2/MAPK14/RELA/AKT1/MAPK8/ICAM1/GSTP1/MAPK1/CDK4/NFKBIA/IL1B/CCL2/CXCL8/NOS3/SERPINE1/IL1A/CXCL11/CXCL2/CXCL10	19
BP	GO:0070997	neuron death	23/117	360/18866	3.91e-17	5.46e-15	2.52e-15	GSK3B/AKT1/BCL2/JUN/CASP3/HMOX1/BCL2L1/CASP9/RB1/TP53/APP/MCL1/IFNG/XIAP/HIF1A/SOD2/FOS/CASP8/SOD1/HSPA5/CCL2/NQO1/PARP1	23
BP	GO:0009612	response to mechanical stimulus	19/117	209/18866	4.09e-17	5.51e-15	2.55e-15	PTGS2/PPARG/MAPK14/RELA/AKT1/JUN/MAPK8/STAT1/EGFR/NFKBIA/FOS/CASP8/RAF1/GJA1/IL1B/COL1A1/MPO/COL3A1/CXCL10	19
BP	GO:0071496	cellular response to external stimulus	22/117	326/18866	6.43e-17	8.36e-15	3.86e-15	PTGS2/PPARG/AKT1/BCL2/JUN/MAPK8/HMOX1/ICAM1/VCAM1/GSTP1/EGFR/CDKN1A/MAPK1/TP53/MDM2/FOS/CASP8/HSPA5/GJA1/IL1B/COL1A1/NFE2L2	22
BP	GO:0071219	cellular response to molecule of bacterial origin	19/117	222/18866	1.27e-16	1.6e-14	7.38e-15	NOS2/MAPK14/RELA/AKT1/MAPK8/ICAM1/GSTP1/MAPK1/CDK4/NFKBIA/IL1B/CCL2/CXCL8/NOS3/SERPINE1/IL1A/CXCL11/CXCL2/CXCL10	19
BP	GO:0044706	multi-multicellular organism process	19/117	226/18866	1.77e-16	2.16e-14	9.97e-15	AR/PTGS2/ESR1/AKR1B1/PGR/AKT1/BCL2/CYP1A1/VEGFA/MMP2/MMP9/MAPK1/FOS/SOD1/GJA1/IL1B/THBD/CLDN4/SPP1	19
BP	GO:0048545	response to steroid hormone	22/117	346/18866	2.25e-16	2.66e-14	1.23e-14	AR/PTGS2/ESR2/ESR1/RELA/PGR/BCL2/CASP3/ICAM1/GSTP1/EGFR/CCND1/CDKN1A/CASP9/MDM2/CA2/FOS/CAV1/COL1A1/PARP1/CLDN4/SPP1	22
BP	GO:0007565	female pregnancy	18/117	196/18866	2.44e-16	2.79e-14	1.29e-14	AR/PTGS2/ESR1/AKR1B1/PGR/AKT1/BCL2/VEGFA/MMP2/MMP9/MAPK1/FOS/SOD1/GJA1/IL1B/THBD/CLDN4/SPP1	18
BP	GO:0050678	regulation of epithelial cell proliferation	23/117	395/18866	2.97e-16	3.3e-14	1.52e-14	AR/SCN5A/KDR/PPARG/PGR/AKT1/JUN/STAT1/HMOX1/ALOX5/EGFR/VEGFA/CCND1/RB1/ERBB2/HIF1A/VEGFC/CAV1/MYC/F3/GJA1/CCL2/IGF2	23
BP	GO:0071276	cellular response to cadmium ion	11/117	38/18866	3.37e-16	3.57e-14	1.65e-14	NCF1/AKT1/JUN/MAPK8/HMOX1/EGFR/MMP9/MAPK1/FOS/SOD1/CHUK	11
BP	GO:0060326	cell chemotaxis	21/117	311/18866	3.47e-16	3.57e-14	1.65e-14	F7/DPP4/KDR/MAPK14/ALOX5/GSTP1/VEGFA/MAPK1/IL6R/IL4/MET/DPEP1/VEGFC/IL1B/CCL2/CXCL8/HSPB1/SERPINE1/CXCL11/CXCL2/CXCL10	21
BP	GO:1901654	response to ketone	18/117	200/18866	3.5e-16	3.57e-14	1.65e-14	AR/F7/PPARG/AKR1B1/RELA/AKT1/ICAM1/EGFR/CCND1/BCL2L1/CDKN1A/CASP9/CDK4/FOS/CAV1/PARP1/CLDN4/SPP1	18
BP	GO:0001666	response to hypoxia	22/117	359/18866	4.88e-16	4.85e-14	2.24e-14	NOS2/PTGS2/F7/DPP4/AKT1/BCL2/CASP3/HMOX1/CYP1A1/ICAM1/PLAU/VEGFA/MMP2/TP53/MDM2/HIF1A/VEGFC/RAF1/CAV1/MYC/PLAT/NFE2L2	22
BP	GO:0007568	aging	21/117	319/18866	5.79e-16	5.59e-14	2.59e-14	PTGS2/MAPK14/RELA/AKT1/BCL2/JUN/CDK1/CYP1A1/ICAM1/CDKN1A/CASP9/MAPK1/TP53/APP/SOD2/FOS/SOD1/SERPINE1/MPO/NFE2L2/NQO1	21
BP	GO:0036293	response to decreased oxygen levels	22/117	371/18866	9.7e-16	9.14e-14	4.23e-14	NOS2/PTGS2/F7/DPP4/AKT1/BCL2/CASP3/HMOX1/CYP1A1/ICAM1/PLAU/VEGFA/MMP2/TP53/MDM2/HIF1A/VEGFC/RAF1/CAV1/MYC/PLAT/NFE2L2	22
BP	GO:0009636	response to toxic substance	19/117	250/18866	1.15e-15	1.06e-13	4.91e-14	PTGS2/PTGS1/BCL2/CDK1/CYP1A1/GSTP1/CDKN1A/MAPK1/CDK4/MDM2/SOD2/FOS/SOD1/NOS3/MPO/NFE2L2/NQO1/CHUK/PON1	19
BP	GO:0050727	regulation of inflammatory response	23/117	425/18866	1.45e-15	1.3e-13	6.01e-14	NOS2/PTGS2/ESR1/PPARG/MAPK14/RELA/TNFAIP6/SELE/ALOX5/GSTP1/EGFR/MMP9/RB1/NFKBIA/IL2RA/IFNG/IL4/XIAP/MMP3/SOD1/IL1B/PTGER3/SERPINE1	23
BP	GO:0048608	reproductive structure development	23/117	443/18866	3.53e-15	3.1e-13	1.43e-13	AR/PTGS2/ESR1/PPARG/MAPK14/PGR/AKT1/BCL2/CASP3/ICAM1/EGFR/VEGFA/CCND1/BCL2L1/MAPK1/HIF1A/CASP8/SOD1/HSPA5/GJA1/NOS3/SPP1/IGF2	23
BP	GO:1901653	cellular response to peptide	22/117	398/18866	4.16e-15	3.57e-13	1.65e-13	PPARG/GSK3B/AKR1B1/RELA/AKT1/STAT1/ICAM1/VCAM1/GSTP1/ADRB2/CDK4/TP53/MDM2/APP/CA2/CAV1/GJA1/IL1B/PRKCB/NFE2L2/PARP1/IGF2	22
BP	GO:0061458	reproductive system development	23/117	447/18866	4.28e-15	3.59e-13	1.66e-13	AR/PTGS2/ESR1/PPARG/MAPK14/PGR/AKT1/BCL2/CASP3/ICAM1/EGFR/VEGFA/CCND1/BCL2L1/MAPK1/HIF1A/CASP8/SOD1/HSPA5/GJA1/NOS3/SPP1/IGF2	23
BP	GO:0046686	response to cadmium ion	12/117	64/18866	4.55e-15	3.73e-13	1.72e-13	NCF1/AKT1/JUN/MAPK8/CDK1/HMOX1/EGFR/MMP9/MAPK1/FOS/SOD1/CHUK	12
BP	GO:0051090	regulation of DNA-binding transcription factor activity	23/117	455/18866	6.26e-15	5.02e-13	2.32e-13	AR/ESR2/ESR1/PPARG/MAPK14/RELA/IKBKB/AKT1/JUN/MAPK8/HMOX1/ICAM1/VEGFA/MAPK1/RB1/NFKBIA/APP/CD40LG/FOS/CAV1/IL1B/PRKCB/CHUK	23
BP	GO:2000377	regulation of reactive oxygen species metabolic process	17/117	200/18866	6.42e-15	5.04e-13	2.33e-13	PTGS2/MAPK14/AKT1/BCL2/ICAM1/ALOX5/GSTP1/EGFR/CDKN1A/TP53/IFNG/HIF1A/MMP3/SOD1/CAV1/IL1B/NFE2L2	17
BP	GO:0034612	response to tumor necrosis factor	20/117	320/18866	8.24e-15	6.34e-13	2.93e-13	PTGS2/MAPK14/RELA/IKBKB/AKT1/CASP3/STAT1/ICAM1/SELE/GSTP1/MAPK1/TP53/NFKBIA/CD40LG/CASP8/CCL2/CXCL8/COL1A1/NFE2L2/CHUK	20
BP	GO:0009411	response to UV	15/117	140/18866	8.8e-15	6.63e-13	3.07e-13	PTGS2/RELA/AKT1/BCL2/CASP3/MAPK8/EGFR/CCND1/CDKN1A/CASP9/TP53/MDM2/TYR/MYC/PARP1	15
BP	GO:0007584	response to nutrient	16/117	171/18866	9.29e-15	6.87e-13	3.18e-13	PTGS2/F7/PPARG/RELA/STAT1/HMOX1/CYP1A1/GSTP1/EGFR/CCND1/MDM2/TYR/COL1A1/NQO1/CXCL10/SPP1	16
BP	GO:0051402	neuron apoptotic process	18/117	245/18866	1.25e-14	9.07e-13	4.19e-13	BCL2/JUN/CASP3/HMOX1/BCL2L1/CASP9/RB1/TP53/APP/MCL1/XIAP/HIF1A/SOD2/SOD1/HSPA5/CCL2/NQO1/PARP1	18
BP	GO:0033273	response to vitamin	13/117	91/18866	1.3e-14	9.22e-13	4.26e-13	PTGS2/F7/PPARG/RELA/CYP1A1/GSTP1/EGFR/CCND1/MDM2/TYR/COL1A1/CXCL10/SPP1	13
BP	GO:0002685	regulation of leukocyte migration	17/117	212/18866	1.69e-14	1.18e-12	5.47e-13	F7/DPP4/MAPK14/AKT1/HMOX1/ICAM1/SELE/VEGFA/MAPK1/IL6R/APP/IL4/VEGFC/CCL2/CXCL8/SERPINE1/CXCL10	17
BP	GO:0097193	intrinsic apoptotic signaling pathway	19/117	290/18866	1.75e-14	1.2e-12	5.55e-13	PTGS2/AKT1/BCL2/CASP3/HMOX1/BCL2L1/CDKN1A/CASP9/MMP9/TP53/MDM2/MCL1/HIF1A/SOD2/SOD1/CAV1/HSPB1/NFE2L2/PARP1	19
BP	GO:1901342	regulation of vasculature development	22/117	444/18866	3.92e-14	2.64e-12	1.22e-12	PTGS2/KDR/PPARG/STAT1/HMOX1/ALOX5/VEGFA/IL6R/ERBB2/HIF1A/SOD2/VEGFC/F3/IL1B/CXCL8/PRKCB/NOS3/HSPB1/SERPINE1/IL1A/NFE2L2/CXCL10	22
BP	GO:0050920	regulation of chemotaxis	17/117	229/18866	6.07e-14	4.01e-12	1.86e-12	F7/DPP4/KDR/MAPK14/GSTP1/VEGFA/MAPK1/IL6R/IL4/MET/VEGFC/F3/CCL2/CXCL8/HSPB1/SERPINE1/CXCL10	17
BP	GO:0030595	leukocyte chemotaxis	17/117	232/18866	7.52e-14	4.89e-12	2.26e-12	F7/DPP4/MAPK14/ALOX5/VEGFA/MAPK1/IL6R/IL4/DPEP1/VEGFC/IL1B/CCL2/CXCL8/SERPINE1/CXCL11/CXCL2/CXCL10	17
BP	GO:1904018	positive regulation of vasculature development	17/117	235/18866	9.28e-14	5.93e-12	2.74e-12	PTGS2/KDR/HMOX1/VEGFA/IL6R/HIF1A/SOD2/VEGFC/F3/IL1B/CXCL8/PRKCB/NOS3/HSPB1/SERPINE1/IL1A/NFE2L2	17
BP	GO:1901214	regulation of neuron death	19/117	321/18866	1.1e-13	6.89e-12	3.18e-12	GSK3B/AKT1/BCL2/JUN/CASP3/HMOX1/BCL2L1/CASP9/TP53/MCL1/IFNG/HIF1A/SOD2/FOS/CASP8/SOD1/CCL2/NQO1/PARP1	19
BP	GO:2001242	regulation of intrinsic apoptotic signaling pathway	15/117	166/18866	1.12e-13	6.95e-12	3.21e-12	PTGS2/AKT1/BCL2/BCL2L1/MMP9/TP53/MDM2/MCL1/HIF1A/SOD2/SOD1/CAV1/HSPB1/NFE2L2/PARP1	15
BP	GO:0071214	cellular response to abiotic stimulus	19/117	331/18866	1.9e-13	1.14e-11	5.25e-12	PTGS2/MAPK14/AKR1B1/AKT1/CASP3/MAPK8/EGFR/BCL2L1/CDKN1A/CASP9/TP53/MDM2/CASP8/HSPA5/MYC/GJA1/IL1B/COL1A1/PARP1	19
BP	GO:0104004	cellular response to environmental stimulus	19/117	331/18866	1.9e-13	1.14e-11	5.25e-12	PTGS2/MAPK14/AKR1B1/AKT1/CASP3/MAPK8/EGFR/BCL2L1/CDKN1A/CASP9/TP53/MDM2/CASP8/HSPA5/MYC/GJA1/IL1B/COL1A1/PARP1	19
BP	GO:0018209	peptidyl-serine modification	19/117	333/18866	2.11e-13	1.25e-11	5.76e-12	PTGS2/MAPK14/GSK3B/CDK2/IKBKB/AKT1/BCL2/MAPK8/CDK1/EGFR/VEGFA/MAPK1/APP/IFNG/RAF1/CAV1/PRKCB/PARP1/CHUK	19
BP	GO:0010212	response to ionizing radiation	14/117	144/18866	2.82e-13	1.61e-11	7.44e-12	MAPK14/BCL2/CASP3/ICAM1/CCND1/BCL2L1/CDKN1A/TP53/MDM2/HSPA5/MYC/THBD/PARP1/CXCL10	14
BP	GO:0050921	positive regulation of chemotaxis	14/117	144/18866	2.82e-13	1.61e-11	7.44e-12	F7/KDR/MAPK14/VEGFA/MAPK1/IL6R/IL4/MET/VEGFC/F3/CXCL8/HSPB1/SERPINE1/CXCL10	14
BP	GO:0048732	gland development	21/117	443/18866	3.75e-13	2.11e-11	9.76e-12	AR/ESR1/RELA/PGR/AKT1/BCL2/JUN/HMOX1/CYP1A1/EGFR/VEGFA/CCND1/MAPK1/TYR/MET/HIF1A/EGF/RAF1/SOD1/CAV1/IGF2	21
BP	GO:0043434	response to peptide hormone	21/117	447/18866	4.46e-13	2.47e-11	1.14e-11	PTGS2/F7/PPARG/GSK3B/RELA/AKT1/STAT1/ICAM1/GSTP1/CDK4/MDM2/CA2/CAV1/GJA1/IL1B/PRKCB/COL1A1/NFE2L2/PARP1/CHUK/IGF2	21
BP	GO:0001936	regulation of endothelial cell proliferation	15/117	184/18866	5.13e-13	2.8e-11	1.3e-11	KDR/PPARG/AKT1/JUN/STAT1/HMOX1/ALOX5/VEGFA/HIF1A/VEGFC/CAV1/F3/GJA1/CCL2/IGF2	15
BP	GO:0045765	regulation of angiogenesis	20/117	403/18866	6.23e-13	3.36e-11	1.55e-11	PTGS2/KDR/PPARG/STAT1/HMOX1/ALOX5/VEGFA/ERBB2/HIF1A/VEGFC/F3/IL1B/CXCL8/PRKCB/NOS3/HSPB1/SERPINE1/IL1A/NFE2L2/CXCL10	20
BP	GO:0018105	peptidyl-serine phosphorylation	18/117	310/18866	7.14e-13	3.79e-11	1.75e-11	PTGS2/MAPK14/GSK3B/CDK2/IKBKB/AKT1/BCL2/MAPK8/CDK1/EGFR/VEGFA/MAPK1/APP/IFNG/RAF1/CAV1/PRKCB/CHUK	18
BP	GO:0052547	regulation of peptidase activity	21/117	466/18866	9.92e-13	5.2e-11	2.4e-11	PTGS2/PPARG/MAPK14/AKT1/SLPI/VEGFA/CASP9/MMP9/MDM2/APP/BIRC5/XIAP/DPEP1/CASP8/RAF1/CAV1/MYC/F3/SERPINE1/CLDN4/CTSD	21
BP	GO:0007159	leukocyte cell-cell adhesion	19/117	364/18866	1.03e-12	5.31e-11	2.45e-11	DPP4/RELA/OLR1/AKT1/CASP3/ICAM1/SELE/VCAM1/ALOX5/ERBB2/IL2RA/IFNG/IL4/CD40LG/CAV1/IL1B/CCL2/IL1A/IGF2	19
BP	GO:0009416	response to light stimulus	18/117	319/18866	1.16e-12	5.9e-11	2.72e-11	PTGS2/RELA/AKT1/BCL2/CASP3/MAPK8/EGFR/CCND1/CDKN1A/CASP9/TP53/MDM2/APP/TYR/HIF1A/FOS/MYC/PARP1	18
BP	GO:1903409	reactive oxygen species biosynthetic process	13/117	128/18866	1.18e-12	5.9e-11	2.72e-11	NOS2/PTGS2/AKT1/CYP1A1/ICAM1/ALOX5/IFNG/SOD1/CAV1/IL1B/NOS3/MPO/NQO1	13
BP	GO:0051098	regulation of binding	19/117	367/18866	1.19e-12	5.9e-11	2.72e-11	PPARG/GSK3B/AKT1/JUN/MAPK8/HMOX1/SLPI/ADRB2/CDKN1A/MMP9/RB1/NFKBIA/APP/IFNG/MET/EGF/CAV1/PARP1/PON1	19
BP	GO:1903039	positive regulation of leukocyte cell-cell adhesion	16/117	235/18866	1.33e-12	6.51e-11	3.01e-11	DPP4/RELA/AKT1/ICAM1/SELE/VCAM1/ALOX5/IL2RA/IFNG/IL4/CD40LG/CAV1/IL1B/CCL2/IL1A/IGF2	16
BP	GO:1904645	response to amyloid-beta	10/117	56/18866	1.59e-12	7.69e-11	3.55e-11	GSK3B/ICAM1/VCAM1/ADRB2/MMP2/MMP9/APP/MMP3/GJA1/PARP1	10
BP	GO:0001935	endothelial cell proliferation	15/117	199/18866	1.61e-12	7.69e-11	3.55e-11	KDR/PPARG/AKT1/JUN/STAT1/HMOX1/ALOX5/VEGFA/HIF1A/VEGFC/CAV1/F3/GJA1/CCL2/IGF2	15
BP	GO:0048661	positive regulation of smooth muscle cell proliferation	12/117	103/18866	1.73e-12	8.17e-11	3.78e-11	PTGS2/AKR1B1/AKT1/JUN/STAT1/HMOX1/EGFR/MMP2/MMP9/IL6R/MDM2/GJA1	12
BP	GO:0001101	response to acid chemical	13/117	132/18866	1.76e-12	8.21e-11	3.79e-11	F7/AKR1B1/RELA/CASP3/ICAM1/GSTP1/EGFR/VEGFA/BCL2L1/MMP2/COL1A1/COL3A1/CHUK	13
BP	GO:0045785	positive regulation of cell adhesion	20/117	428/18866	1.89e-12	8.68e-11	4.01e-11	DPP4/KDR/GSK3B/RELA/AKT1/ICAM1/SELE/VCAM1/ALOX5/VEGFA/ERBB2/IL2RA/IFNG/IL4/CD40LG/CAV1/IL1B/CCL2/IL1A/IGF2	20
BP	GO:1903037	regulation of leukocyte cell-cell adhesion	18/117	329/18866	1.95e-12	8.86e-11	4.1e-11	DPP4/RELA/AKT1/CASP3/ICAM1/SELE/VCAM1/ALOX5/ERBB2/IL2RA/IFNG/IL4/CD40LG/CAV1/IL1B/CCL2/IL1A/IGF2	18
BP	GO:0030099	myeloid cell differentiation	20/117	431/18866	2.14e-12	9.63e-11	4.45e-11	PPARG/MAPK14/JUN/CASP3/STAT1/VEGFA/CASP9/MMP9/RB1/NFKBIA/APP/IFNG/IL4/CA2/HIF1A/FOS/CASP8/MYC/PRKCB/PARP1	20
BP	GO:2000379	positive regulation of reactive oxygen species metabolic process	12/117	106/18866	2.46e-12	1.09e-10	5.04e-11	PTGS2/MAPK14/AKT1/ICAM1/GSTP1/EGFR/CDKN1A/TP53/IFNG/SOD1/IL1B/NFE2L2	12
BP	GO:0022407	regulation of cell-cell adhesion	20/117	439/18866	3e-12	1.32e-10	6.08e-11	DPP4/MAPK14/RELA/AKT1/CASP3/ICAM1/SELE/VCAM1/ALOX5/VEGFA/ERBB2/IL2RA/IFNG/IL4/CD40LG/CAV1/IL1B/CCL2/IL1A/IGF2	20
BP	GO:0045766	positive regulation of angiogenesis	15/117	208/18866	3.06e-12	1.33e-10	6.13e-11	PTGS2/KDR/HMOX1/VEGFA/HIF1A/VEGFC/F3/IL1B/CXCL8/PRKCB/NOS3/HSPB1/SERPINE1/IL1A/NFE2L2	15
BP	GO:1902175	regulation of oxidative stress-induced intrinsic apoptotic signaling pathway	8/117	27/18866	3.45e-12	1.48e-10	6.84e-11	AKT1/MCL1/HIF1A/SOD2/SOD1/HSPB1/NFE2L2/PARP1	8
BP	GO:0050679	positive regulation of epithelial cell proliferation	15/117	211/18866	3.76e-12	1.59e-10	7.37e-11	AR/SCN5A/KDR/AKT1/JUN/HMOX1/EGFR/VEGFA/CCND1/ERBB2/HIF1A/VEGFC/MYC/F3/IGF2	15
BP	GO:0031668	cellular response to extracellular stimulus	16/117	253/18866	4.1e-12	1.69e-10	7.83e-11	PPARG/BCL2/JUN/MAPK8/HMOX1/ICAM1/VCAM1/GSTP1/CDKN1A/MAPK1/TP53/MDM2/FOS/HSPA5/COL1A1/NFE2L2	16
BP	GO:0071356	cellular response to tumor necrosis factor	17/117	297/18866	4.12e-12	1.69e-10	7.83e-11	MAPK14/RELA/IKBKB/AKT1/STAT1/ICAM1/GSTP1/MAPK1/TP53/NFKBIA/CD40LG/CASP8/CCL2/CXCL8/COL1A1/NFE2L2/CHUK	17
BP	GO:0032355	response to estradiol	13/117	141/18866	4.13e-12	1.69e-10	7.83e-11	PTGS2/F7/ESR2/ESR1/CASP3/GSTP1/EGFR/CCND1/CASP9/CASP8/GJA1/COL1A1/NQO1	13
BP	GO:0010634	positive regulation of epithelial cell migration	14/117	176/18866	4.48e-12	1.81e-10	8.39e-11	PTGS2/KDR/AKT1/JUN/HMOX1/VEGFA/MMP9/IFNG/MET/HIF1A/VEGFC/NOS3/HSPB1/NFE2L2	14
BP	GO:0002687	positive regulation of leukocyte migration	13/117	142/18866	4.52e-12	1.81e-10	8.39e-11	F7/MAPK14/ICAM1/SELE/VEGFA/MAPK1/IL6R/APP/IL4/VEGFC/CXCL8/SERPINE1/CXCL10	13
BP	GO:0008631	intrinsic apoptotic signaling pathway in response to oxidative stress	9/117	43/18866	4.69e-12	1.86e-10	8.61e-11	AKT1/BCL2/MCL1/HIF1A/SOD2/SOD1/HSPB1/NFE2L2/PARP1	9
BP	GO:0043281	regulation of cysteine-type endopeptidase activity involved in apoptotic process	15/117	215/18866	4.93e-12	1.94e-10	8.96e-11	PTGS2/PPARG/AKT1/VEGFA/CASP9/MMP9/MDM2/BIRC5/XIAP/DPEP1/CASP8/RAF1/MYC/F3/CTSD	15
BP	GO:0062012	regulation of small molecule metabolic process	20/117	456/18866	5.99e-12	2.33e-10	1.08e-10	NOS2/PTGS2/PPARG/GSK3B/AKT1/TP53/APP/IFNG/IL4/HIF1A/EGF/ODC1/SOD1/CAV1/IL1B/NOS3/NQO1/PARP1/IGFBP3/IGF2	20
BP	GO:0048511	rhythmic process	17/117	305/18866	6.29e-12	2.42e-10	1.12e-10	NOS2/F7/ESR1/PPARG/GSK3B/PGR/JUN/CASP3/MAPK8/CDK1/EGFR/CDK4/TP53/HSPA5/NOS3/SERPINE1/CLDN4	17
BP	GO:0042542	response to hydrogen peroxide	13/117	146/18866	6.46e-12	2.46e-10	1.14e-10	RELA/BCL2/JUN/CASP3/STAT1/CDK1/HMOX1/MDM2/MET/SOD1/COL1A1/NFE2L2/NQO1	13
BP	GO:0051222	positive regulation of protein transport	18/117	354/18866	6.65e-12	2.51e-10	1.16e-10	PTGS2/MAPK14/GSK3B/BCL2/MAPK8/CDK1/EGFR/MAPK1/TP53/MDM2/ERBB2/IFNG/HIF1A/VEGFC/CASP8/GJA1/IL1B/IL1A	18
BP	GO:0097529	myeloid leukocyte migration	15/117	222/18866	7.82e-12	2.92e-10	1.35e-10	DPP4/MAPK14/VEGFA/MAPK1/IL6R/IL4/DPEP1/VEGFC/IL1B/CCL2/CXCL8/SERPINE1/CXCL11/CXCL2/CXCL10	15
BP	GO:1900407	regulation of cellular response to oxidative stress	11/117	92/18866	1.14e-11	4.21e-10	1.95e-10	AKT1/ALOX5/MCL1/MET/HIF1A/SOD2/MMP3/SOD1/HSPB1/NFE2L2/PARP1	11
BP	GO:1904951	positive regulation of establishment of protein localization	18/117	370/18866	1.39e-11	5.07e-10	2.34e-10	PTGS2/MAPK14/GSK3B/BCL2/MAPK8/CDK1/EGFR/MAPK1/TP53/MDM2/ERBB2/IFNG/HIF1A/VEGFC/CASP8/GJA1/IL1B/IL1A	18
BP	GO:0009266	response to temperature stimulus	15/117	233/18866	1.56e-11	5.67e-10	2.62e-10	PTGS2/PPARG/GSK3B/AKT1/HMOX1/ADRB2/CDKN1A/MAPK1/NFKBIA/FOS/CASP8/SOD1/NOS3/IL1A/CXCL10	15
BP	GO:0002688	regulation of leukocyte chemotaxis	12/117	124/18866	1.62e-11	5.82e-10	2.69e-10	F7/DPP4/MAPK14/VEGFA/MAPK1/IL6R/IL4/VEGFC/CCL2/CXCL8/SERPINE1/CXCL10	12
BP	GO:0097305	response to alcohol	15/117	234/18866	1.66e-11	5.91e-10	2.73e-10	F7/PPARG/AKT1/CDK1/ICAM1/GSTP1/CCND1/BCL2L1/CDKN1A/CDK4/FOS/CASP8/SOD1/NQO1/PARP1	15
BP	GO:0042110	T cell activation	20/117	483/18866	1.69e-11	5.97e-10	2.76e-10	DPP4/AKT1/BCL2/CASP3/ICAM1/VCAM1/TP53/ERBB2/IL2RA/IFNG/IL4/CD40LG/CASP8/SOD1/CAV1/IL1B/CCL2/IL1A/RUNX2/IGF2	20
BP	GO:0022409	positive regulation of cell-cell adhesion	16/117	279/18866	1.8e-11	6.28e-10	2.9e-10	DPP4/RELA/AKT1/ICAM1/SELE/VCAM1/ALOX5/IL2RA/IFNG/IL4/CD40LG/CAV1/IL1B/CCL2/IL1A/IGF2	16
BP	GO:0036473	cell death in response to oxidative stress	11/117	97/18866	2.06e-11	7.05e-10	3.26e-10	AKT1/BCL2/MCL1/MET/HIF1A/SOD2/MMP3/SOD1/HSPB1/NFE2L2/PARP1	11
BP	GO:1901216	positive regulation of neuron death	11/117	97/18866	2.06e-11	7.05e-10	3.26e-10	GSK3B/JUN/CASP3/CASP9/TP53/MCL1/IFNG/FOS/CASP8/NQO1/PARP1	11
BP	GO:2000116	regulation of cysteine-type endopeptidase activity	15/117	239/18866	2.25e-11	7.63e-10	3.53e-10	PTGS2/PPARG/AKT1/VEGFA/CASP9/MMP9/MDM2/BIRC5/XIAP/DPEP1/CASP8/RAF1/MYC/F3/CTSD	15
BP	GO:2001243	negative regulation of intrinsic apoptotic signaling pathway	11/117	98/18866	2.3e-11	7.76e-10	3.58e-10	PTGS2/AKT1/BCL2/BCL2L1/MMP9/MDM2/MCL1/HIF1A/SOD2/HSPB1/NFE2L2	11
BP	GO:0006801	superoxide metabolic process	10/117	74/18866	2.93e-11	9.78e-10	4.52e-10	NOS2/NCF1/GSTP1/EGFR/SOD2/SOD1/NOS3/MPO/NFE2L2/NQO1	10
BP	GO:1903829	positive regulation of cellular protein localization	17/117	338/18866	3.19e-11	1.05e-09	4.88e-10	PTGS2/MAPK14/GSK3B/AKT1/BCL2/MAPK8/CDK1/EGFR/MAPK1/TP53/MDM2/ERBB2/IFNG/EGF/CASP8/IL1B/PARP1	17
BP	GO:1902882	regulation of response to oxidative stress	11/117	101/18866	3.22e-11	1.05e-09	4.88e-10	AKT1/ALOX5/MCL1/MET/HIF1A/SOD2/MMP3/SOD1/HSPB1/NFE2L2/PARP1	11
BP	GO:0038034	signal transduction in absence of ligand	10/117	75/18866	3.36e-11	1.08e-09	4.97e-10	GSK3B/AKT1/BCL2/CASP3/BCL2L1/CASP9/MCL1/IL4/IL1B/IL1A	10
BP	GO:0043627	response to estrogen	10/117	75/18866	3.36e-11	1.08e-09	4.97e-10	AR/F7/ESR1/PPARG/HMOX1/CCND1/MAPK1/MDM2/CA2/CAV1	10
BP	GO:0097192	extrinsic apoptotic signaling pathway in absence of ligand	10/117	75/18866	3.36e-11	1.08e-09	4.97e-10	GSK3B/AKT1/BCL2/CASP3/BCL2L1/CASP9/MCL1/IL4/IL1B/IL1A	10
BP	GO:0045931	positive regulation of mitotic cell cycle	13/117	168/18866	3.85e-11	1.22e-09	5.64e-10	AKT1/CDK1/CYP1A1/EGFR/CCND1/RB1/CDK4/MDM2/APP/EGF/IL1B/IL1A/IGF2	13
BP	GO:1903201	regulation of oxidative stress-induced cell death	10/117	77/18866	4.41e-11	1.38e-09	6.4e-10	AKT1/MCL1/MET/HIF1A/SOD2/MMP3/SOD1/HSPB1/NFE2L2/PARP1	10
BP	GO:0002573	myeloid leukocyte differentiation	14/117	210/18866	4.87e-11	1.52e-09	7.02e-10	PPARG/MAPK14/JUN/VEGFA/MMP9/RB1/APP/IFNG/IL4/CA2/FOS/CASP8/MYC/PARP1	14
BP	GO:0010632	regulation of epithelial cell migration	16/117	301/18866	5.6e-11	1.73e-09	8e-10	PTGS2/KDR/PPARG/AKT1/JUN/HMOX1/VEGFA/MMP9/IFNG/IL4/MET/HIF1A/VEGFC/NOS3/HSPB1/NFE2L2	16
BP	GO:0043536	positive regulation of blood vessel endothelial cell migration	10/117	79/18866	5.73e-11	1.76e-09	8.12e-10	PTGS2/KDR/AKT1/HMOX1/VEGFA/HIF1A/VEGFC/NOS3/HSPB1/NFE2L2	10
BP	GO:0090068	positive regulation of cell cycle process	16/117	302/18866	5.88e-11	1.78e-09	8.22e-10	CDK2/AKT1/CDK1/CYP1A1/EGFR/CCND1/CDKN1A/RB1/CDK4/TP53/MDM2/APP/EGF/IL1B/IL1A/IGF2	16
BP	GO:0010332	response to gamma radiation	9/117	56/18866	5.89e-11	1.78e-09	8.22e-10	BCL2/BCL2L1/CDKN1A/TP53/MDM2/HSPA5/MYC/PARP1/CXCL10	9
BP	GO:0043523	regulation of neuron apoptotic process	14/117	214/18866	6.27e-11	1.88e-09	8.67e-10	BCL2/JUN/CASP3/HMOX1/BCL2L1/CASP9/TP53/MCL1/HIF1A/SOD2/SOD1/CCL2/NQO1/PARP1	14
BP	GO:0002526	acute inflammatory response	11/117	111/18866	9.1e-11	2.7e-09	1.25e-09	PTGS2/PPARG/ICAM1/GSTP1/IL6R/IL4/PTGES/F3/IL1B/PTGER3/IL1A	11
BP	GO:0090316	positive regulation of intracellular protein transport	13/117	182/18866	1.05e-10	3.1e-09	1.43e-09	PTGS2/MAPK14/GSK3B/BCL2/MAPK8/CDK1/MAPK1/TP53/MDM2/ERBB2/IFNG/CASP8/IL1B	13
BP	GO:0010631	epithelial cell migration	17/117	365/18866	1.06e-10	3.1e-09	1.43e-09	PTGS2/DPP4/KDR/PPARG/AKT1/JUN/HMOX1/VEGFA/MMP9/IFNG/IL4/MET/HIF1A/VEGFC/NOS3/HSPB1/NFE2L2	17
BP	GO:1903034	regulation of response to wounding	13/117	183/18866	1.13e-10	3.27e-09	1.51e-09	F7/ALOX5/PLAU/CAV1/F3/GJA1/NOS3/PLAT/THBD/SERPINE1/NFE2L2/CLDN4/SPP1	13
BP	GO:0090132	epithelium migration	17/117	368/18866	1.2e-10	3.46e-09	1.6e-09	PTGS2/DPP4/KDR/PPARG/AKT1/JUN/HMOX1/VEGFA/MMP9/IFNG/IL4/MET/HIF1A/VEGFC/NOS3/HSPB1/NFE2L2	17
BP	GO:0043200	response to amino acid	11/117	114/18866	1.22e-10	3.48e-09	1.61e-09	F7/RELA/CASP3/ICAM1/GSTP1/EGFR/BCL2L1/MMP2/COL1A1/COL3A1/CHUK	11
BP	GO:0051091	positive regulation of DNA-binding transcription factor activity	15/117	270/18866	1.26e-10	3.57e-09	1.65e-09	AR/ESR2/ESR1/PPARG/RELA/IKBKB/AKT1/ICAM1/VEGFA/APP/CD40LG/CAV1/IL1B/PRKCB/CHUK	15
BP	GO:2000045	regulation of G1/S transition of mitotic cell cycle	13/117	185/18866	1.29e-10	3.64e-09	1.68e-09	CDK2/AKT1/BCL2/CDK1/CYP1A1/EGFR/CCND1/CDKN1A/RB1/CDK4/TP53/MDM2/CCL2	13
BP	GO:0045862	positive regulation of proteolysis	17/117	370/18866	1.31e-10	3.66e-09	1.69e-09	PPARG/MAPK14/GSK3B/AKT1/CASP9/MDM2/APP/IFNG/EGF/CASP8/CAV1/MYC/F3/IL1B/NFE2L2/CLDN4/CTSD	17
BP	GO:1902042	negative regulation of extrinsic apoptotic signaling pathway via death domain receptors	8/117	41/18866	1.38e-10	3.84e-09	1.77e-09	GSK3B/HMOX1/ICAM1/BCL2L1/CASP8/RAF1/NOS3/SERPINE1	8
BP	GO:0014074	response to purine-containing compound	12/117	149/18866	1.42e-10	3.9e-09	1.8e-09	PTGS2/PPARG/RELA/STAT1/APP/TYR/FOS/SOD1/HSPA5/IL1B/THBD/COL1A1	12
BP	GO:1904705	regulation of vascular associated smooth muscle cell proliferation	10/117	87/18866	1.53e-10	4.14e-09	1.91e-09	PPARG/JUN/HMOX1/GSTP1/CDKN1A/MMP2/MMP9/MDM2/SOD2/GJA1	10
BP	GO:1990874	vascular associated smooth muscle cell proliferation	10/117	87/18866	1.53e-10	4.14e-09	1.91e-09	PPARG/JUN/HMOX1/GSTP1/CDKN1A/MMP2/MMP9/MDM2/SOD2/GJA1	10
BP	GO:0090130	tissue migration	17/117	374/18866	1.55e-10	4.17e-09	1.93e-09	PTGS2/DPP4/KDR/PPARG/AKT1/JUN/HMOX1/VEGFA/MMP9/IFNG/IL4/MET/HIF1A/VEGFC/NOS3/HSPB1/NFE2L2	17
BP	GO:0061041	regulation of wound healing	12/117	151/18866	1.66e-10	4.43e-09	2.05e-09	F7/ALOX5/PLAU/CAV1/F3/GJA1/NOS3/PLAT/THBD/SERPINE1/NFE2L2/CLDN4	12
BP	GO:0003018	vascular process in circulatory system	13/117	190/18866	1.8e-10	4.78e-09	2.21e-09	PTGS2/AKT1/HMOX1/ICAM1/ADRB2/EGFR/VEGFA/SOD2/ABCB1/SOD1/CAV1/GJA1/NOS3	13
BP	GO:0052548	regulation of endopeptidase activity	18/117	434/18866	1.89e-10	4.97e-09	2.3e-09	PTGS2/PPARG/AKT1/SLPI/VEGFA/CASP9/MMP9/MDM2/APP/BIRC5/XIAP/DPEP1/CASP8/RAF1/MYC/F3/SERPINE1/CTSD	18
BP	GO:0060135	maternal process involved in female pregnancy	9/117	64/18866	2.06e-10	5.38e-09	2.49e-09	AR/PTGS2/ESR1/AKR1B1/PGR/AKT1/MAPK1/GJA1/SPP1	9
BP	GO:0062013	positive regulation of small molecule metabolic process	12/117	154/18866	2.08e-10	5.42e-09	2.51e-09	NOS2/PTGS2/PPARG/AKT1/APP/IFNG/IL4/HIF1A/EGF/IL1B/NOS3/IGF2	12
BP	GO:1903706	regulation of hemopoiesis	19/117	498/18866	2.3e-10	5.95e-09	2.75e-09	MAPK14/JUN/STAT1/RB1/NFKBIA/ERBB2/IL2RA/IFNG/IL4/CA2/HIF1A/FOS/CASP8/SOD1/MYC/IL1B/PRKCB/IL1A/NFE2L2	19
BP	GO:0001890	placenta development	12/117	156/18866	2.42e-10	6.21e-09	2.87e-09	PTGS2/PPARG/MAPK14/AKT1/EGFR/MAPK1/HIF1A/CASP8/SOD1/GJA1/SPP1/IGF2	12
BP	GO:0046824	positive regulation of nucleocytoplasmic transport	9/117	66/18866	2.73e-10	6.97e-09	3.22e-09	PTGS2/MAPK14/GSK3B/CDK1/MAPK1/TP53/MDM2/IFNG/IL1B	9
BP	GO:0001819	positive regulation of cytokine production	18/117	447/18866	3.03e-10	7.68e-09	3.55e-09	PTGS2/MAPK14/RELA/STAT1/IL6R/APP/IFNG/IL4/CD40LG/HIF1A/CASP8/SOD1/F3/IL1B/HSPB1/SERPINE1/IL1A/CHUK	18
BP	GO:0007596	blood coagulation	16/117	343/18866	3.84e-10	9.66e-09	4.46e-09	F7/PLAU/MAPK1/CD40LG/RAF1/CAV1/F3/PRKCB/NOS3/HSPB1/PLAT/THBD/SERPINE1/COL1A1/NFE2L2/COL3A1	16
BP	GO:0071621	granulocyte chemotaxis	11/117	127/18866	3.94e-10	9.83e-09	4.54e-09	DPP4/MAPK14/MAPK1/IL4/DPEP1/IL1B/CCL2/CXCL8/CXCL11/CXCL2/CXCL10	11
BP	GO:0002690	positive regulation of leukocyte chemotaxis	10/117	96/18866	4.11e-10	1.02e-08	4.71e-09	F7/MAPK14/VEGFA/MAPK1/IL6R/IL4/VEGFC/CXCL8/SERPINE1/CXCL10	10
BP	GO:0071902	positive regulation of protein serine/threonine kinase activity	16/117	345/18866	4.18e-10	1.03e-08	4.76e-09	MAPK14/AKT1/CDK1/ADRB2/EGFR/VEGFA/CCND1/MAPK1/ERBB2/IFNG/CD40LG/EGF/RAF1/SOD1/IL1B/IGF2	16
BP	GO:0031960	response to corticosteroid	12/117	164/18866	4.33e-10	1.06e-08	4.89e-09	PTGS2/BCL2/CASP3/ICAM1/GSTP1/EGFR/CCND1/CDKN1A/CASP9/FOS/COL1A1/PARP1	12
BP	GO:1903708	positive regulation of hemopoiesis	13/117	204/18866	4.35e-10	1.06e-08	4.89e-09	MAPK14/JUN/STAT1/RB1/IL2RA/IFNG/IL4/CA2/HIF1A/FOS/CASP8/IL1B/IL1A	13
BP	GO:0046677	response to antibiotic	8/117	47/18866	4.41e-10	1.07e-08	4.93e-09	CASP3/CYP1A1/CASP9/TP53/MDM2/CASP8/SOD1/HSPA5	8
BP	GO:0007599	hemostasis	16/117	348/18866	4.74e-10	1.14e-08	5.27e-09	F7/PLAU/MAPK1/CD40LG/RAF1/CAV1/F3/PRKCB/NOS3/HSPB1/PLAT/THBD/SERPINE1/COL1A1/NFE2L2/COL3A1	16
BP	GO:1902806	regulation of cell cycle G1/S phase transition	13/117	206/18866	4.91e-10	1.17e-08	5.41e-09	CDK2/AKT1/BCL2/CDK1/CYP1A1/EGFR/CCND1/CDKN1A/RB1/CDK4/TP53/MDM2/CCL2	13
BP	GO:0050817	coagulation	16/117	349/18866	4.95e-10	1.17e-08	5.42e-09	F7/PLAU/MAPK1/CD40LG/RAF1/CAV1/F3/PRKCB/NOS3/HSPB1/PLAT/THBD/SERPINE1/COL1A1/NFE2L2/COL3A1	16
BP	GO:0035690	cellular response to drug	9/117	71/18866	5.36e-10	1.26e-08	5.84e-09	NOS2/KCNH2/EGFR/TP53/DPEP1/HSPA5/MYC/IL1B/NFE2L2	9
BP	GO:0031098	stress-activated protein kinase signaling cascade	15/117	300/18866	5.46e-10	1.28e-08	5.91e-09	MAPK14/AKR1B1/NCF1/IKBKB/AKT1/MAPK8/GSTP1/EGFR/VEGFA/MAPK1/APP/CD40LG/MYC/IL1B/CHUK	15
BP	GO:0048638	regulation of developmental growth	16/117	353/18866	5.84e-10	1.36e-08	6.28e-09	AR/MAPK14/GSK3B/AKT1/BCL2/CDK1/ADRB2/VEGFA/CDKN1A/MAPK1/CDK4/APP/SOD1/GJA1/SPP1/IGF2	16
BP	GO:0010595	positive regulation of endothelial cell migration	11/117	132/18866	5.97e-10	1.38e-08	6.38e-09	PTGS2/KDR/AKT1/HMOX1/VEGFA/MET/HIF1A/VEGFC/NOS3/HSPB1/NFE2L2	11
BP	GO:0008585	female gonad development	10/117	100/18866	6.17e-10	1.42e-08	6.56e-09	ESR1/PGR/BCL2/CASP3/ICAM1/VEGFA/BCL2L1/SOD1/HSPA5/NOS3	10
BP	GO:0001503	ossification	17/117	412/18866	6.84e-10	1.56e-08	7.22e-09	PTGS2/MAPK14/AKT1/BCL2/ALOX5/ADRB2/EGFR/MMP2/MAPK1/IL6R/HIF1A/VEGFC/COL1A1/SPP1/RUNX2/IGFBP3/IGF2	17
BP	GO:0046683	response to organophosphorus	11/117	134/18866	7.01e-10	1.59e-08	7.37e-09	PTGS2/RELA/STAT1/APP/TYR/FOS/SOD1/HSPA5/IL1B/THBD/COL1A1	11
BP	GO:0035994	response to muscle stretch	6/117	18/18866	8.73e-10	1.97e-08	9.11e-09	MAPK14/RELA/JUN/NFKBIA/FOS/RAF1	6
BP	GO:0031100	animal organ regeneration	9/117	75/18866	8.86e-10	1.99e-08	9.19e-09	F7/PPARG/CDK1/HMOX1/GSTP1/EGFR/CCND1/CDKN1A/CDK4	9
BP	GO:0001667	ameboidal-type cell migration	18/117	481/18866	9.8e-10	2.19e-08	1.01e-08	PTGS2/DPP4/KDR/PPARG/AKT1/JUN/HMOX1/VEGFA/MMP9/IFNG/IL4/MET/HIF1A/VEGFC/GJA1/NOS3/HSPB1/NFE2L2	18
BP	GO:0046545	development of primary female sexual characteristics	10/117	105/18866	1e-09	2.22e-08	1.03e-08	ESR1/PGR/BCL2/CASP3/ICAM1/VEGFA/BCL2L1/SOD1/HSPA5/NOS3	10
BP	GO:0048771	tissue remodeling	12/117	178/18866	1.11e-09	2.45e-08	1.13e-08	ADRB2/EGFR/MMP2/TP53/MDM2/CA2/HIF1A/CAV1/GJA1/NOS3/IL1A/SPP1	12
BP	GO:0150076	neuroinflammatory response	9/117	77/18866	1.13e-09	2.47e-08	1.14e-08	PTGS2/JUN/EGFR/MMP9/APP/IFNG/IL4/MMP3/IL1B	9
BP	GO:0002064	epithelial cell development	13/117	221/18866	1.16e-09	2.52e-08	1.17e-08	AR/ESR1/GSK3B/AKR1B1/PGR/IKBKB/ICAM1/VEGFA/CDKN1A/MET/HIF1A/SOD1/IL1B	13
BP	GO:0031669	cellular response to nutrient levels	13/117	221/18866	1.16e-09	2.52e-08	1.17e-08	PPARG/BCL2/JUN/MAPK8/HMOX1/ICAM1/CDKN1A/MAPK1/TP53/MDM2/HSPA5/COL1A1/NFE2L2	13
BP	GO:0032388	positive regulation of intracellular transport	13/117	222/18866	1.23e-09	2.65e-08	1.22e-08	PTGS2/MAPK14/GSK3B/BCL2/MAPK8/CDK1/MAPK1/TP53/MDM2/ERBB2/IFNG/CASP8/IL1B	13
BP	GO:0060749	mammary gland alveolus development	6/117	19/18866	1.27e-09	2.71e-08	1.25e-08	AR/ESR1/VEGFA/CCND1/HIF1A/EGF	6
BP	GO:0061377	mammary gland lobule development	6/117	19/18866	1.27e-09	2.71e-08	1.25e-08	AR/ESR1/VEGFA/CCND1/HIF1A/EGF	6
BP	GO:0035296	regulation of tube diameter	11/117	143/18866	1.41e-09	2.96e-08	1.37e-08	PTGS2/AKT1/HMOX1/ICAM1/ADRB2/EGFR/SOD2/SOD1/CAV1/GJA1/NOS3	11
BP	GO:0097746	regulation of blood vessel diameter	11/117	143/18866	1.41e-09	2.96e-08	1.37e-08	PTGS2/AKT1/HMOX1/ICAM1/ADRB2/EGFR/SOD2/SOD1/CAV1/GJA1/NOS3	11
BP	GO:0006809	nitric oxide biosynthetic process	9/117	79/18866	1.42e-09	2.98e-08	1.38e-08	NOS2/PTGS2/AKT1/ICAM1/IFNG/CAV1/IL1B/NOS3/NQO1	9
BP	GO:0032102	negative regulation of response to external stimulus	17/117	433/18866	1.45e-09	3.03e-08	1.4e-08	DPP4/PPARG/TNFAIP6/ALOX5/GSTP1/PLAU/RB1/IL2RA/IL4/SOD1/GJA1/CCL2/NOS3/PLAT/THBD/SERPINE1/SPP1	17
BP	GO:0035150	regulation of tube size	11/117	144/18866	1.51e-09	3.14e-08	1.45e-08	PTGS2/AKT1/HMOX1/ICAM1/ADRB2/EGFR/SOD2/SOD1/CAV1/GJA1/NOS3	11
BP	GO:0008217	regulation of blood pressure	12/117	187/18866	1.95e-09	4.03e-08	1.86e-08	NOS2/AR/PTGS2/PTGS1/PPARG/HMOX1/ADRB2/SOD2/VEGFC/SOD1/GJA1/NOS3	12
BP	GO:0030193	regulation of blood coagulation	9/117	82/18866	1.99e-09	4.08e-08	1.89e-08	F7/PLAU/CAV1/F3/NOS3/PLAT/THBD/SERPINE1/NFE2L2	9
BP	GO:0071375	cellular response to peptide hormone stimulus	15/117	330/18866	2.02e-09	4.12e-08	1.9e-08	PPARG/GSK3B/RELA/AKT1/STAT1/GSTP1/CDK4/MDM2/CA2/CAV1/IL1B/PRKCB/NFE2L2/PARP1/IGF2	15
BP	GO:0050863	regulation of T cell activation	15/117	332/18866	2.19e-09	4.45e-08	2.05e-08	DPP4/AKT1/CASP3/VCAM1/ERBB2/IL2RA/IFNG/IL4/CD40LG/SOD1/CAV1/IL1B/CCL2/IL1A/IGF2	15
BP	GO:0048145	regulation of fibroblast proliferation	9/117	83/18866	2.22e-09	4.46e-08	2.06e-08	ESR1/PPARG/JUN/GSTP1/EGFR/CDKN1A/CDK4/TP53/MYC	9
BP	GO:1900046	regulation of hemostasis	9/117	83/18866	2.22e-09	4.46e-08	2.06e-08	F7/PLAU/CAV1/F3/NOS3/PLAT/THBD/SERPINE1/NFE2L2	9
BP	GO:0097530	granulocyte migration	11/117	150/18866	2.34e-09	4.67e-08	2.16e-08	DPP4/MAPK14/MAPK1/IL4/DPEP1/IL1B/CCL2/CXCL8/CXCL11/CXCL2/CXCL10	11
BP	GO:0071453	cellular response to oxygen levels	13/117	235/18866	2.46e-09	4.87e-08	2.25e-08	PTGS2/PPARG/AKT1/BCL2/HMOX1/ICAM1/VEGFA/TP53/MDM2/HIF1A/CAV1/MYC/NFE2L2	13
BP	GO:0046209	nitric oxide metabolic process	9/117	84/18866	2.48e-09	4.87e-08	2.25e-08	NOS2/PTGS2/AKT1/ICAM1/IFNG/CAV1/IL1B/NOS3/NQO1	9
BP	GO:0048144	fibroblast proliferation	9/117	84/18866	2.48e-09	4.87e-08	2.25e-08	ESR1/PPARG/JUN/GSTP1/EGFR/CDKN1A/CDK4/TP53/MYC	9
BP	GO:0007566	embryo implantation	8/117	58/18866	2.54e-09	4.97e-08	2.3e-08	PTGS2/VEGFA/MMP2/MMP9/SOD1/GJA1/IL1B/SPP1	8
BP	GO:0043154	negative regulation of cysteine-type endopeptidase activity involved in apoptotic process	9/117	85/18866	2.76e-09	5.36e-08	2.48e-08	PTGS2/AKT1/VEGFA/MMP9/MDM2/BIRC5/XIAP/DPEP1/RAF1	9
BP	GO:0007249	I-kappaB kinase/NF-kappaB signaling	14/117	286/18866	2.8e-09	5.4e-08	2.49e-08	ESR1/RELA/IKBKB/AKT1/STAT1/HMOX1/GSTP1/NFKBIA/CASP8/GJA1/IL1B/PRKCB/HSPB1/CHUK	14
BP	GO:0051403	stress-activated MAPK cascade	14/117	286/18866	2.8e-09	5.4e-08	2.49e-08	MAPK14/NCF1/IKBKB/AKT1/MAPK8/GSTP1/EGFR/VEGFA/MAPK1/APP/CD40LG/MYC/IL1B/CHUK	14
BP	GO:1904019	epithelial cell apoptotic process	10/117	117/18866	2.91e-09	5.58e-08	2.58e-08	KDR/HMOX1/ICAM1/BCL2L1/RB1/IL4/CD40LG/CCL2/SERPINE1/NFE2L2	10
BP	GO:0000082	G1/S transition of mitotic cell cycle	14/117	287/18866	2.93e-09	5.59e-08	2.58e-08	CDK2/AKT1/BCL2/CDK1/CYP1A1/EGFR/CCND1/CDKN1A/RB1/CDK4/TP53/MDM2/MYC/CCL2	14
BP	GO:0045787	positive regulation of cell cycle	16/117	396/18866	3.06e-09	5.8e-08	2.68e-08	CDK2/AKT1/CDK1/CYP1A1/EGFR/CCND1/CDKN1A/RB1/CDK4/TP53/MDM2/APP/EGF/IL1B/IL1A/IGF2	16
BP	GO:0070663	regulation of leukocyte proliferation	13/117	240/18866	3.17e-09	5.98e-08	2.76e-08	BCL2/CASP3/VCAM1/GSTP1/CDKN1A/MAPK1/ERBB2/IL2RA/IL4/CD40LG/IL1B/IL1A/IGF2	13
BP	GO:2001057	reactive nitrogen species metabolic process	9/117	87/18866	3.4e-09	6.38e-08	2.95e-08	NOS2/PTGS2/AKT1/ICAM1/IFNG/CAV1/IL1B/NOS3/NQO1	9
BP	GO:0046660	female sex differentiation	10/117	119/18866	3.44e-09	6.39e-08	2.95e-08	ESR1/PGR/BCL2/CASP3/ICAM1/VEGFA/BCL2L1/SOD1/HSPA5/NOS3	10
BP	GO:0055093	response to hyperoxia	6/117	22/18866	3.44e-09	6.39e-08	2.95e-08	PPARG/CYP1A1/CDKN1A/CDK4/CAV1/COL1A1	6
BP	GO:0050818	regulation of coagulation	9/117	88/18866	3.77e-09	6.96e-08	3.22e-08	F7/PLAU/CAV1/F3/NOS3/PLAT/THBD/SERPINE1/NFE2L2	9
BP	GO:1902041	regulation of extrinsic apoptotic signaling pathway via death domain receptors	8/117	61/18866	3.85e-09	7.07e-08	3.27e-08	GSK3B/HMOX1/ICAM1/BCL2L1/CASP8/RAF1/NOS3/SERPINE1	8
BP	GO:0010506	regulation of autophagy	15/117	347/18866	3.99e-09	7.31e-08	3.38e-08	KDR/GSK3B/AKT1/BCL2/CASP3/MAPK8/HMOX1/ADRB2/TP53/MCL1/IFNG/IL4/MET/HIF1A/HSPB1	15
BP	GO:0008625	extrinsic apoptotic signaling pathway via death domain receptors	9/117	89/18866	4.17e-09	7.6e-08	3.51e-08	GSK3B/BCL2/HMOX1/ICAM1/BCL2L1/CASP8/RAF1/NOS3/SERPINE1	9
BP	GO:0009615	response to virus	15/117	349/18866	4.32e-09	7.83e-08	3.62e-08	MAPK14/RELA/IKBKB/BCL2/STAT1/CYP1A1/BCL2L1/IL2RA/IFNG/IL4/ODC1/IL1B/HSPB1/CXCL10/CHUK	15
BP	GO:0031099	regeneration	12/117	201/18866	4.44e-09	8e-08	3.7e-08	F7/PPARG/BCL2/JUN/CDK1/HMOX1/GSTP1/EGFR/CCND1/CDKN1A/CDK4/SPP1	12
BP	GO:1901522	positive regulation of transcription from RNA polymerase II promoter involved in cellular response to chemical stimulus	6/117	23/18866	4.63e-09	8.31e-08	3.84e-08	RELA/VEGFA/TP53/HIF1A/NFE2L2/RUNX2	6
BP	GO:0060249	anatomical structure homeostasis	17/117	469/18866	4.82e-09	8.62e-08	3.98e-08	PTGS2/AKR1B1/BCL2/ADRB2/EGFR/VEGFA/MAPK1/RB1/CA2/HIF1A/SOD1/MYC/GJA1/NOS3/HSPB1/PARP1/SPP1	17
BP	GO:0051101	regulation of DNA binding	10/117	124/18866	5.14e-09	9.14e-08	4.23e-08	PPARG/JUN/MAPK8/HMOX1/MMP9/RB1/NFKBIA/IFNG/EGF/PARP1	10
BP	GO:0008637	apoptotic mitochondrial changes	10/117	125/18866	5.56e-09	9.84e-08	4.55e-08	GSK3B/AKT1/BCL2/JUN/MAPK8/BCL2L1/MMP9/TP53/SOD2/CASP8	10
BP	GO:0043122	regulation of I-kappaB kinase/NF-kappaB signaling	13/117	252/18866	5.71e-09	1.01e-07	4.65e-08	ESR1/RELA/IKBKB/AKT1/STAT1/HMOX1/GSTP1/CASP8/GJA1/IL1B/PRKCB/HSPB1/CHUK	13
BP	GO:0043535	regulation of blood vessel endothelial cell migration	11/117	164/18866	6e-09	1.05e-07	4.85e-08	PTGS2/KDR/PPARG/AKT1/HMOX1/VEGFA/HIF1A/VEGFC/NOS3/HSPB1/NFE2L2	11
BP	GO:2000134	negative regulation of G1/S transition of mitotic cell cycle	10/117	126/18866	6.01e-09	1.05e-07	4.85e-08	CDK2/BCL2/CDK1/CCND1/CDKN1A/RB1/CDK4/TP53/MDM2/CCL2	10
BP	GO:2000117	negative regulation of cysteine-type endopeptidase activity	9/117	93/18866	6.18e-09	1.07e-07	4.96e-08	PTGS2/AKT1/VEGFA/MMP9/MDM2/BIRC5/XIAP/DPEP1/RAF1	9
BP	GO:1901992	positive regulation of mitotic cell cycle phase transition	9/117	94/18866	6.8e-09	1.18e-07	5.44e-08	AKT1/CDK1/CYP1A1/EGFR/CCND1/RB1/CDK4/MDM2/APP	9
BP	GO:0032768	regulation of monooxygenase activity	8/117	66/18866	7.31e-09	1.26e-07	5.82e-08	AKT1/EGFR/IFNG/HIF1A/CAV1/IL1B/NOS3/IL1A	8
BP	GO:0070555	response to interleukin-1	12/117	211/18866	7.67e-09	1.31e-07	6.08e-08	RELA/IKBKB/ICAM1/SELE/NFKBIA/APP/HIF1A/IL1B/CCL2/CXCL8/IL1A/CHUK	12
BP	GO:0044843	cell cycle G1/S phase transition	14/117	310/18866	7.86e-09	1.34e-07	6.19e-08	CDK2/AKT1/BCL2/CDK1/CYP1A1/EGFR/CCND1/CDKN1A/RB1/CDK4/TP53/MDM2/MYC/CCL2	14
BP	GO:0046688	response to copper ion	7/117	43/18866	7.89e-09	1.34e-07	6.19e-08	CDK1/CYP1A1/ICAM1/APP/SOD1/IL1A/NFE2L2	7
BP	GO:0050927	positive regulation of positive chemotaxis	6/117	25/18866	8.04e-09	1.36e-07	6.29e-08	F7/KDR/VEGFA/VEGFC/F3/CXCL8	6
BP	GO:0051100	negative regulation of binding	11/117	169/18866	8.22e-09	1.38e-07	6.39e-08	GSK3B/AKT1/JUN/MAPK8/HMOX1/SLPI/ADRB2/CDKN1A/NFKBIA/MET/CAV1	11
BP	GO:0050918	positive chemotaxis	8/117	67/18866	8.26e-09	1.38e-07	6.4e-08	F7/KDR/VEGFA/MET/VEGFC/F3/CXCL8/CXCL10	8
BP	GO:0001894	tissue homeostasis	13/117	261/18866	8.7e-09	1.45e-07	6.71e-08	PTGS2/AKR1B1/BCL2/ADRB2/EGFR/VEGFA/RB1/CA2/SOD1/GJA1/NOS3/HSPB1/SPP1	13
BP	GO:0070661	leukocyte proliferation	14/117	313/18866	8.88e-09	1.47e-07	6.82e-08	BCL2/CASP3/VCAM1/GSTP1/CDKN1A/MAPK1/TP53/ERBB2/IL2RA/IL4/CD40LG/IL1B/IL1A/IGF2	14
BP	GO:0050870	positive regulation of T cell activation	12/117	214/18866	8.98e-09	1.48e-07	6.85e-08	DPP4/AKT1/VCAM1/IL2RA/IFNG/IL4/CD40LG/CAV1/IL1B/CCL2/IL1A/IGF2	12
BP	GO:1901655	cellular response to ketone	9/117	97/18866	9e-09	1.48e-07	6.85e-08	AR/PPARG/AKR1B1/AKT1/ICAM1/EGFR/CASP9/CDK4/SPP1	9
BP	GO:1902807	negative regulation of cell cycle G1/S phase transition	10/117	132/18866	9.43e-09	1.55e-07	7.15e-08	CDK2/BCL2/CDK1/CCND1/CDKN1A/RB1/CDK4/TP53/MDM2/CCL2	10
BP	GO:0045637	regulation of myeloid cell differentiation	13/117	263/18866	9.53e-09	1.56e-07	7.19e-08	MAPK14/JUN/STAT1/RB1/NFKBIA/IFNG/IL4/CA2/HIF1A/FOS/CASP8/MYC/PRKCB	13
BP	GO:0048010	vascular endothelial growth factor receptor signaling pathway	9/117	98/18866	9.85e-09	1.6e-07	7.4e-08	KDR/MAPK14/NCF1/VEGFA/HIF1A/VEGFC/IL1B/PRKCB/HSPB1	9
BP	GO:0033157	regulation of intracellular protein transport	13/117	264/18866	9.97e-09	1.61e-07	7.46e-08	PTGS2/MAPK14/GSK3B/BCL2/MAPK8/CDK1/MAPK1/TP53/MDM2/ERBB2/IFNG/CASP8/IL1B	13
BP	GO:0019430	removal of superoxide radicals	6/117	26/18866	1.04e-08	1.67e-07	7.72e-08	SOD2/SOD1/NOS3/MPO/NFE2L2/NQO1	6
BP	GO:0050926	regulation of positive chemotaxis	6/117	26/18866	1.04e-08	1.67e-07	7.72e-08	F7/KDR/VEGFA/VEGFC/F3/CXCL8	6
BP	GO:0048662	negative regulation of smooth muscle cell proliferation	8/117	69/18866	1.05e-08	1.67e-07	7.74e-08	PPARG/HMOX1/GSTP1/CDKN1A/IFNG/SOD2/NOS3/IGFBP3	8
BP	GO:0018108	peptidyl-tyrosine phosphorylation	15/117	374/18866	1.09e-08	1.74e-07	8.05e-08	KDR/NCF1/ICAM1/EGFR/VEGFA/IL6R/TP53/APP/ERBB2/IFNG/IL4/MET/EGF/CAV1/IGF2	15
BP	GO:1904646	cellular response to amyloid-beta	7/117	45/18866	1.1e-08	1.74e-07	8.05e-08	GSK3B/ICAM1/VCAM1/ADRB2/APP/GJA1/PARP1	7
BP	GO:0007623	circadian rhythm	12/117	218/18866	1.11e-08	1.74e-07	8.06e-08	NOS2/F7/PPARG/GSK3B/JUN/MAPK8/CDK1/EGFR/CDK4/TP53/SERPINE1/CLDN4	12
BP	GO:0051099	positive regulation of binding	11/117	174/18866	1.11e-08	1.75e-07	8.09e-08	PPARG/GSK3B/MMP9/RB1/APP/IFNG/MET/EGF/CAV1/PARP1/PON1	11
BP	GO:0018212	peptidyl-tyrosine modification	15/117	377/18866	1.22e-08	1.91e-07	8.81e-08	KDR/NCF1/ICAM1/EGFR/VEGFA/IL6R/TP53/APP/ERBB2/IFNG/IL4/MET/EGF/CAV1/IGF2	15
BP	GO:0045639	positive regulation of myeloid cell differentiation	9/117	101/18866	1.29e-08	2.01e-07	9.27e-08	MAPK14/JUN/STAT1/RB1/IFNG/CA2/HIF1A/FOS/CASP8	9
BP	GO:0008406	gonad development	12/117	223/18866	1.42e-08	2.21e-07	1.02e-07	AR/ESR1/PGR/BCL2/CASP3/ICAM1/VEGFA/CCND1/BCL2L1/SOD1/HSPA5/NOS3	12
BP	GO:0030225	macrophage differentiation	7/117	47/18866	1.51e-08	2.33e-07	1.08e-07	VEGFA/MMP9/RB1/APP/IFNG/CASP8/PARP1	7
BP	GO:0098869	cellular oxidant detoxification	9/117	103/18866	1.53e-08	2.36e-07	1.09e-07	PTGS2/PTGS1/GSTP1/SOD2/SOD1/NOS3/MPO/NFE2L2/NQO1	9
BP	GO:0071450	cellular response to oxygen radical	6/117	28/18866	1.68e-08	2.57e-07	1.19e-07	SOD2/SOD1/NOS3/MPO/NFE2L2/NQO1	6
BP	GO:0071451	cellular response to superoxide	6/117	28/18866	1.68e-08	2.57e-07	1.19e-07	SOD2/SOD1/NOS3/MPO/NFE2L2/NQO1	6
BP	GO:0034504	protein localization to nucleus	13/117	277/18866	1.77e-08	2.69e-07	1.24e-07	PTGS2/MAPK14/GSK3B/AKT1/CDK1/CDKN1A/MAPK1/TP53/NFKBIA/MDM2/IFNG/COL1A1/PARP1	13
BP	GO:0032147	activation of protein kinase activity	14/117	331/18866	1.8e-08	2.72e-07	1.26e-07	MAPK14/AKT1/CDK1/ADRB2/EGFR/VEGFA/MAPK1/IL6R/IL4/CD40LG/EGF/RAF1/SOD1/IL1B	14
BP	GO:0030879	mammary gland development	10/117	142/18866	1.91e-08	2.87e-07	1.33e-07	AR/ESR1/PGR/AKT1/VEGFA/CCND1/MAPK1/HIF1A/EGF/CAV1	10
BP	GO:0045137	development of primary sexual characteristics	12/117	229/18866	1.91e-08	2.88e-07	1.33e-07	AR/ESR1/PGR/BCL2/CASP3/ICAM1/VEGFA/CCND1/BCL2L1/SOD1/HSPA5/NOS3	12
BP	GO:0010001	glial cell differentiation	12/117	230/18866	2.01e-08	3.01e-07	1.39e-07	PPARG/RELA/AKT1/CDK1/GSTP1/EGFR/MAPK1/APP/ERBB2/IFNG/SOD1/IL1B	12
BP	GO:0036296	response to increased oxygen levels	6/117	29/18866	2.11e-08	3.15e-07	1.46e-07	PPARG/CYP1A1/CDKN1A/CDK4/CAV1/COL1A1	6
BP	GO:0030198	extracellular matrix organization	15/117	395/18866	2.26e-08	3.36e-07	1.55e-07	DPP4/KDR/MMP1/ICAM1/VCAM1/MMP2/MMP9/RB1/APP/MMP3/CAV1/SERPINE1/COL1A1/COL3A1/SPP1	15
BP	GO:0010959	regulation of metal ion transport	15/117	396/18866	2.34e-08	3.45e-07	1.59e-07	PTGS2/SCN5A/AKT1/BCL2/ICAM1/ADRB2/KCNH2/IFNG/EGF/CAV1/GJA1/CCL2/NOS3/CXCL11/CXCL10	15
BP	GO:0043062	extracellular structure organization	15/117	396/18866	2.34e-08	3.45e-07	1.59e-07	DPP4/KDR/MMP1/ICAM1/VCAM1/MMP2/MMP9/RB1/APP/MMP3/CAV1/SERPINE1/COL1A1/COL3A1/SPP1	15
BP	GO:0034349	glial cell apoptotic process	5/117	15/18866	2.41e-08	3.53e-07	1.63e-07	CASP3/CASP9/RB1/TP53/CCL2	5
BP	GO:0033138	positive regulation of peptidyl-serine phosphorylation	9/117	109/18866	2.52e-08	3.69e-07	1.7e-07	PTGS2/AKT1/BCL2/EGFR/VEGFA/APP/IFNG/RAF1/CAV1	9
BP	GO:0043542	endothelial cell migration	13/117	286/18866	2.58e-08	3.76e-07	1.74e-07	PTGS2/DPP4/KDR/PPARG/AKT1/HMOX1/VEGFA/MET/HIF1A/VEGFC/NOS3/HSPB1/NFE2L2	13
BP	GO:0006367	transcription initiation from RNA polymerase II promoter	11/117	189/18866	2.63e-08	3.78e-07	1.75e-07	AR/ESR2/ESR1/PPARG/PGR/CDK1/CCND1/CDKN1A/CDK4/TP53/RUNX2	11
BP	GO:0043534	blood vessel endothelial cell migration	11/117	189/18866	2.63e-08	3.78e-07	1.75e-07	PTGS2/KDR/PPARG/AKT1/HMOX1/VEGFA/HIF1A/VEGFC/NOS3/HSPB1/NFE2L2	11
BP	GO:0000303	response to superoxide	6/117	30/18866	2.63e-08	3.78e-07	1.75e-07	SOD2/SOD1/NOS3/MPO/NFE2L2/NQO1	6
BP	GO:0051384	response to glucocorticoid	10/117	147/18866	2.65e-08	3.81e-07	1.76e-07	PTGS2/BCL2/CASP3/ICAM1/GSTP1/EGFR/CCND1/CDKN1A/CASP9/FOS	10
BP	GO:1901989	positive regulation of cell cycle phase transition	9/117	110/18866	2.73e-08	3.9e-07	1.8e-07	AKT1/CDK1/CYP1A1/EGFR/CCND1/RB1/CDK4/MDM2/APP	9
BP	GO:0010594	regulation of endothelial cell migration	12/117	238/18866	2.93e-08	4.18e-07	1.93e-07	PTGS2/KDR/PPARG/AKT1/HMOX1/VEGFA/MET/HIF1A/VEGFC/NOS3/HSPB1/NFE2L2	12
BP	GO:1902105	regulation of leukocyte differentiation	13/117	290/18866	3.04e-08	4.31e-07	1.99e-07	JUN/RB1/ERBB2/IL2RA/IFNG/IL4/CA2/FOS/CASP8/SOD1/MYC/IL1B/IL1A	13
BP	GO:0071260	cellular response to mechanical stimulus	8/117	79/18866	3.11e-08	4.39e-07	2.03e-07	PTGS2/AKT1/MAPK8/EGFR/CASP8/GJA1/IL1B/COL1A1	8
BP	GO:0050999	regulation of nitric-oxide synthase activity	7/117	52/18866	3.13e-08	4.4e-07	2.03e-07	AKT1/EGFR/HIF1A/CAV1/IL1B/NOS3/IL1A	7
BP	GO:0046822	regulation of nucleocytoplasmic transport	9/117	112/18866	3.2e-08	4.49e-07	2.07e-07	PTGS2/MAPK14/GSK3B/CDK1/MAPK1/TP53/MDM2/IFNG/IL1B	9
BP	GO:0070665	positive regulation of leukocyte proliferation	10/117	150/18866	3.22e-08	4.5e-07	2.08e-07	BCL2/VCAM1/CDKN1A/MAPK1/IL2RA/IL4/CD40LG/IL1B/IL1A/IGF2	10
BP	GO:0000305	response to oxygen radical	6/117	31/18866	3.24e-08	4.51e-07	2.09e-07	SOD2/SOD1/NOS3/MPO/NFE2L2/NQO1	6
BP	GO:0001938	positive regulation of endothelial cell proliferation	9/117	113/18866	3.46e-08	4.8e-07	2.22e-07	KDR/AKT1/JUN/HMOX1/VEGFA/HIF1A/VEGFC/F3/IGF2	9
BP	GO:0030336	negative regulation of cell migration	14/117	350/18866	3.62e-08	5e-07	2.31e-07	DPP4/PPARG/AKT1/BCL2/HMOX1/GSTP1/IL4/DPEP1/GJA1/CCL2/SERPINE1/NFE2L2/COL3A1/IGFBP3	14
BP	GO:0051346	negative regulation of hydrolase activity	16/117	473/18866	3.73e-08	5.12e-07	2.37e-07	PTGS2/GSK3B/IKBKB/AKT1/SLPI/VEGFA/MMP9/TP53/MDM2/APP/BIRC5/XIAP/DPEP1/RAF1/NOS3/SERPINE1	16
BP	GO:1990748	cellular detoxification	9/117	114/18866	3.74e-08	5.12e-07	2.37e-07	PTGS2/PTGS1/GSTP1/SOD2/SOD1/NOS3/MPO/NFE2L2/NQO1	9
BP	GO:0030857	negative regulation of epithelial cell differentiation	7/117	54/18866	4.1e-08	5.6e-07	2.59e-07	GSK3B/STAT1/VEGFA/CCND1/MMP9/IFNG/CAV1	7
BP	GO:0051251	positive regulation of lymphocyte activation	14/117	357/18866	4.63e-08	6.3e-07	2.91e-07	DPP4/AKT1/BCL2/VCAM1/CDKN1A/IL2RA/IFNG/IL4/CD40LG/CAV1/IL1B/CCL2/IL1A/IGF2	14
BP	GO:0018107	peptidyl-threonine phosphorylation	9/117	117/18866	4.69e-08	6.36e-07	2.94e-07	GSK3B/AKT1/BCL2/MAPK8/CDK1/MAPK1/APP/EGF/PRKCB	9
BP	GO:0006352	DNA-templated transcription, initiation	12/117	249/18866	4.83e-08	6.5e-07	3.01e-07	AR/ESR2/ESR1/PPARG/PGR/JUN/CDK1/CCND1/CDKN1A/CDK4/TP53/RUNX2	12
BP	GO:0010039	response to iron ion	6/117	33/18866	4.83e-08	6.5e-07	3.01e-07	BCL2/HMOX1/CYP1A1/CCND1/MDM2/HIF1A	6
BP	GO:0031649	heat generation	5/117	17/18866	4.91e-08	6.59e-07	3.04e-07	PTGS2/ADRB2/IL1B/PTGER3/IL1A	5
BP	GO:0051092	positive regulation of NF-kappaB transcription factor activity	10/117	159/18866	5.6e-08	7.46e-07	3.45e-07	AR/RELA/IKBKB/ICAM1/APP/CD40LG/CAV1/IL1B/PRKCB/CHUK	10
BP	GO:1902107	positive regulation of leukocyte differentiation	10/117	159/18866	5.6e-08	7.46e-07	3.45e-07	JUN/RB1/IL2RA/IFNG/IL4/CA2/FOS/CASP8/IL1B/IL1A	10
BP	GO:0045907	positive regulation of vasoconstriction	6/117	34/18866	5.84e-08	7.75e-07	3.58e-07	PTGS2/AKT1/ICAM1/EGFR/CAV1/GJA1	6
BP	GO:0042063	gliogenesis	13/117	307/18866	5.93e-08	7.84e-07	3.63e-07	PPARG/RELA/AKT1/CDK1/GSTP1/EGFR/MAPK1/APP/ERBB2/IFNG/SOD1/IL1B/CCL2	13
BP	GO:2000146	negative regulation of cell motility	14/117	365/18866	6.09e-08	8.04e-07	3.71e-07	DPP4/PPARG/AKT1/BCL2/HMOX1/GSTP1/IL4/DPEP1/GJA1/CCL2/SERPINE1/NFE2L2/COL3A1/IGFBP3	14
BP	GO:0048872	homeostasis of number of cells	12/117	256/18866	6.54e-08	8.6e-07	3.97e-07	MAPK14/AKT1/BCL2/CASP3/STAT1/HMOX1/VEGFA/RB1/IL2RA/HIF1A/SOD1/NOS3	12
BP	GO:0043467	regulation of generation of precursor metabolites and energy	10/117	162/18866	6.69e-08	8.75e-07	4.05e-07	NOS2/GSK3B/AKT1/CDK1/TP53/APP/IFNG/IL4/HIF1A/IGF2	10
BP	GO:0006690	icosanoid metabolic process	9/117	122/18866	6.75e-08	8.77e-07	4.06e-07	PTGS2/PTGS1/CYP1A1/ALOX5/GSTP1/PTGES/DPEP1/IL1B/PON1	9
BP	GO:0097237	cellular response to toxic substance	9/117	122/18866	6.75e-08	8.77e-07	4.06e-07	PTGS2/PTGS1/GSTP1/SOD2/SOD1/NOS3/MPO/NFE2L2/NQO1	9
BP	GO:0045861	negative regulation of proteolysis	14/117	369/18866	6.97e-08	9.04e-07	4.18e-07	PTGS2/AKT1/SLPI/VEGFA/MMP9/TP53/MDM2/APP/BIRC5/XIAP/DPEP1/RAF1/PLAT/SERPINE1	14
BP	GO:0071456	cellular response to hypoxia	11/117	208/18866	7.02e-08	9.07e-07	4.19e-07	PTGS2/AKT1/BCL2/HMOX1/ICAM1/VEGFA/TP53/MDM2/HIF1A/MYC/NFE2L2	11
BP	GO:0010951	negative regulation of endopeptidase activity	12/117	258/18866	7.12e-08	9.17e-07	4.24e-07	PTGS2/AKT1/SLPI/VEGFA/MMP9/MDM2/APP/BIRC5/XIAP/DPEP1/RAF1/SERPINE1	12
BP	GO:0031663	lipopolysaccharide-mediated signaling pathway	7/117	59/18866	7.69e-08	9.87e-07	4.56e-07	MAPK14/AKT1/MAPK1/NFKBIA/IL1B/CCL2/NOS3	7
BP	GO:0034764	positive regulation of transmembrane transport	11/117	210/18866	7.74e-08	9.9e-07	4.57e-07	MAPK14/AKT1/ADRB2/KCNH2/IFNG/CA2/ABCB1/CCL2/NFE2L2/CXCL11/CXCL10	11
BP	GO:0034405	response to fluid shear stress	6/117	36/18866	8.37e-08	1.06e-06	4.89e-07	PTGS2/AKT1/CA2/GJA1/NOS3/NFE2L2	6
BP	GO:1901099	negative regulation of signal transduction in absence of ligand	6/117	36/18866	8.37e-08	1.06e-06	4.89e-07	AKT1/BCL2/BCL2L1/MCL1/IL1B/IL1A	6
BP	GO:2001240	negative regulation of extrinsic apoptotic signaling pathway in absence of ligand	6/117	36/18866	8.37e-08	1.06e-06	4.89e-07	AKT1/BCL2/BCL2L1/MCL1/IL1B/IL1A	6
BP	GO:0009408	response to heat	10/117	166/18866	8.42e-08	1.06e-06	4.91e-07	PTGS2/GSK3B/AKT1/HMOX1/CDKN1A/MAPK1/SOD1/NOS3/IL1A/CXCL10	10
BP	GO:0001836	release of cytochrome c from mitochondria	7/117	60/18866	8.66e-08	1.09e-06	5.02e-07	AKT1/BCL2/JUN/BCL2L1/MMP9/TP53/SOD2	7
BP	GO:0097755	positive regulation of blood vessel diameter	7/117	60/18866	8.66e-08	1.09e-06	5.02e-07	HMOX1/ADRB2/EGFR/SOD2/SOD1/GJA1/NOS3	7
BP	GO:0050730	regulation of peptidyl-tyrosine phosphorylation	12/117	263/18866	8.78e-08	1.1e-06	5.07e-07	NCF1/ICAM1/EGFR/VEGFA/IL6R/TP53/APP/IFNG/IL4/EGF/CAV1/IGF2	12
BP	GO:0018210	peptidyl-threonine modification	9/117	126/18866	8.92e-08	1.11e-06	5.13e-07	GSK3B/AKT1/BCL2/MAPK8/CDK1/MAPK1/APP/EGF/PRKCB	9
BP	GO:1902176	negative regulation of oxidative stress-induced intrinsic apoptotic signaling pathway	5/117	19/18866	9.13e-08	1.13e-06	5.24e-07	AKT1/HIF1A/SOD2/HSPB1/NFE2L2	5
BP	GO:0042391	regulation of membrane potential	15/117	443/18866	1.02e-07	1.26e-06	5.82e-07	SCN5A/KDR/GSK3B/GABRA1/AKT1/BCL2/JUN/ADRB2/KCNH2/BCL2L1/APP/SOD1/CAV1/GJA1/PARP1	15
BP	GO:2000351	regulation of endothelial cell apoptotic process	7/117	62/18866	1.09e-07	1.35e-06	6.22e-07	KDR/ICAM1/IL4/CD40LG/CCL2/SERPINE1/NFE2L2	7
BP	GO:0030856	regulation of epithelial cell differentiation	10/117	171/18866	1.11e-07	1.37e-06	6.32e-07	GSK3B/IKBKB/STAT1/VEGFA/CCND1/MMP9/IFNG/CAV1/IL1B/SERPINE1	10
BP	GO:0014909	smooth muscle cell migration	8/117	93/18866	1.13e-07	1.38e-06	6.36e-07	BCL2/GSTP1/PLAU/MDM2/PLAT/SERPINE1/NFE2L2/IGFBP3	8
BP	GO:1903035	negative regulation of response to wounding	8/117	93/18866	1.13e-07	1.38e-06	6.36e-07	ALOX5/PLAU/GJA1/NOS3/PLAT/THBD/SERPINE1/SPP1	8
BP	GO:0036294	cellular response to decreased oxygen levels	11/117	218/18866	1.13e-07	1.38e-06	6.36e-07	PTGS2/AKT1/BCL2/HMOX1/ICAM1/VEGFA/TP53/MDM2/HIF1A/MYC/NFE2L2	11
BP	GO:0050670	regulation of lymphocyte proliferation	11/117	219/18866	1.19e-07	1.44e-06	6.65e-07	BCL2/CASP3/VCAM1/CDKN1A/ERBB2/IL2RA/IL4/CD40LG/IL1B/IL1A/IGF2	11
BP	GO:0051767	nitric-oxide synthase biosynthetic process	5/117	20/18866	1.21e-07	1.46e-06	6.75e-07	KDR/STAT1/GSTP1/IFNG/CCL2	5
BP	GO:0051769	regulation of nitric-oxide synthase biosynthetic process	5/117	20/18866	1.21e-07	1.46e-06	6.75e-07	KDR/STAT1/GSTP1/IFNG/CCL2	5
BP	GO:0051591	response to cAMP	8/117	94/18866	1.23e-07	1.47e-06	6.79e-07	RELA/STAT1/APP/TYR/FOS/HSPA5/THBD/COL1A1	8
BP	GO:1904035	regulation of epithelial cell apoptotic process	8/117	94/18866	1.23e-07	1.47e-06	6.79e-07	KDR/HMOX1/ICAM1/IL4/CD40LG/CCL2/SERPINE1/NFE2L2	8
BP	GO:0010466	negative regulation of peptidase activity	12/117	272/18866	1.27e-07	1.51e-06	6.99e-07	PTGS2/AKT1/SLPI/VEGFA/MMP9/MDM2/APP/BIRC5/XIAP/DPEP1/RAF1/SERPINE1	12
BP	GO:0032944	regulation of mononuclear cell proliferation	11/117	221/18866	1.3e-07	1.55e-06	7.15e-07	BCL2/CASP3/VCAM1/CDKN1A/ERBB2/IL2RA/IL4/CD40LG/IL1B/IL1A/IGF2	11
BP	GO:0001659	temperature homeostasis	10/117	174/18866	1.31e-07	1.55e-06	7.16e-07	PTGS2/ADRB2/VEGFA/RB1/IL4/CAV1/GJA1/IL1B/PTGER3/IL1A	10
BP	GO:0010469	regulation of signaling receptor activity	10/117	174/18866	1.31e-07	1.55e-06	7.16e-07	ESR2/GRIA2/NCF1/ADRB2/PLAU/APP/IFNG/EGF/CCL2/SERPINE1	10
BP	GO:0031331	positive regulation of cellular catabolic process	14/117	390/18866	1.38e-07	1.62e-06	7.5e-07	KDR/GSK3B/AKT1/HMOX1/ADRB2/MDM2/APP/IFNG/IL4/HIF1A/EGF/CAV1/IL1B/NFE2L2	14
BP	GO:0009896	positive regulation of catabolic process	15/117	454/18866	1.4e-07	1.64e-06	7.59e-07	KDR/GSK3B/AKT1/HMOX1/ADRB2/MDM2/APP/IFNG/IL4/HIF1A/EGF/CAV1/GJA1/IL1B/NFE2L2	15
BP	GO:0043491	protein kinase B signaling	12/117	278/18866	1.6e-07	1.88e-06	8.68e-07	F7/KDR/ESR1/AKT1/EGFR/ERBB2/MET/EGF/F3/IL1B/CCL2/IGF2	12
BP	GO:1902895	positive regulation of pri-miRNA transcription by RNA polymerase II	6/117	40/18866	1.62e-07	1.89e-06	8.72e-07	PPARG/RELA/JUN/TP53/HIF1A/FOS	6
BP	GO:0032869	cellular response to insulin stimulus	11/117	226/18866	1.63e-07	1.9e-06	8.77e-07	PPARG/GSK3B/RELA/AKT1/STAT1/GSTP1/CDK4/IL1B/PRKCB/PARP1/IGF2	11
BP	GO:0048469	cell maturation	10/117	179/18866	1.71e-07	1.98e-06	9.15e-07	PPARG/AKR1B1/PGR/BCL2/VEGFA/CDKN1A/RB1/APP/HIF1A/RUNX2	10
BP	GO:0040013	negative regulation of locomotion	14/117	397/18866	1.71e-07	1.98e-06	9.15e-07	DPP4/PPARG/AKT1/BCL2/HMOX1/GSTP1/IL4/DPEP1/GJA1/CCL2/SERPINE1/NFE2L2/COL3A1/IGFBP3	14
BP	GO:0050671	positive regulation of lymphocyte proliferation	9/117	136/18866	1.72e-07	1.99e-06	9.18e-07	BCL2/VCAM1/CDKN1A/IL2RA/IL4/CD40LG/IL1B/IL1A/IGF2	9
BP	GO:0007548	sex differentiation	12/117	280/18866	1.73e-07	1.99e-06	9.21e-07	AR/ESR1/PGR/BCL2/CASP3/ICAM1/VEGFA/CCND1/BCL2L1/SOD1/HSPA5/NOS3	12
BP	GO:0032946	positive regulation of mononuclear cell proliferation	9/117	137/18866	1.83e-07	2.1e-06	9.72e-07	BCL2/VCAM1/CDKN1A/IL2RA/IL4/CD40LG/IL1B/IL1A/IGF2	9
BP	GO:0051271	negative regulation of cellular component movement	14/117	400/18866	1.87e-07	2.14e-06	9.9e-07	DPP4/PPARG/AKT1/BCL2/HMOX1/GSTP1/IL4/DPEP1/GJA1/CCL2/SERPINE1/NFE2L2/COL3A1/IGFBP3	14
BP	GO:0032868	response to insulin	12/117	283/18866	1.94e-07	2.21e-06	1.02e-06	PPARG/GSK3B/RELA/AKT1/STAT1/ICAM1/GSTP1/CDK4/IL1B/PRKCB/PARP1/IGF2	12
BP	GO:0046651	lymphocyte proliferation	12/117	283/18866	1.94e-07	2.21e-06	1.02e-06	BCL2/CASP3/VCAM1/CDKN1A/TP53/ERBB2/IL2RA/IL4/CD40LG/IL1B/IL1A/IGF2	12
BP	GO:0098754	detoxification	9/117	138/18866	1.95e-07	2.21e-06	1.02e-06	PTGS2/PTGS1/GSTP1/SOD2/SOD1/NOS3/MPO/NFE2L2/NQO1	9
BP	GO:0043405	regulation of MAP kinase activity	13/117	342/18866	2.07e-07	2.33e-06	1.08e-06	MAPK14/CDK1/GSTP1/EGFR/VEGFA/MAPK1/ERBB2/CD40LG/EGF/RAF1/SOD1/CAV1/IL1B	13
BP	GO:0072577	endothelial cell apoptotic process	7/117	68/18866	2.09e-07	2.35e-06	1.08e-06	KDR/ICAM1/IL4/CD40LG/CCL2/SERPINE1/NFE2L2	7
BP	GO:0071347	cellular response to interleukin-1	10/117	183/18866	2.1e-07	2.35e-06	1.08e-06	RELA/IKBKB/ICAM1/NFKBIA/HIF1A/IL1B/CCL2/CXCL8/IL1A/CHUK	10
BP	GO:2001235	positive regulation of apoptotic signaling pathway	10/117	183/18866	2.1e-07	2.35e-06	1.08e-06	GSK3B/BCL2/MAPK8/BCL2L1/MMP9/TP53/MCL1/CASP8/SOD1/CAV1	10
BP	GO:0032943	mononuclear cell proliferation	12/117	286/18866	2.18e-07	2.43e-06	1.12e-06	BCL2/CASP3/VCAM1/CDKN1A/TP53/ERBB2/IL2RA/IL4/CD40LG/IL1B/IL1A/IGF2	12
BP	GO:0002696	positive regulation of leukocyte activation	14/117	406/18866	2.25e-07	2.5e-06	1.16e-06	DPP4/AKT1/BCL2/VCAM1/CDKN1A/IL2RA/IFNG/IL4/CD40LG/CAV1/IL1B/CCL2/IL1A/IGF2	14
BP	GO:0007050	cell cycle arrest	11/117	234/18866	2.31e-07	2.56e-06	1.19e-06	CDK2/CDK1/CCND1/CDKN1A/RB1/CDK4/TP53/MDM2/IFNG/MYC/CXCL8	11
BP	GO:0071695	anatomical structure maturation	11/117	235/18866	2.41e-07	2.67e-06	1.23e-06	PPARG/AKR1B1/PGR/BCL2/VEGFA/CDKN1A/MMP2/RB1/APP/HIF1A/RUNX2	11
BP	GO:0030593	neutrophil chemotaxis	8/117	103/18866	2.5e-07	2.76e-06	1.28e-06	DPP4/DPEP1/IL1B/CCL2/CXCL8/CXCL11/CXCL2/CXCL10	8
BP	GO:0032409	regulation of transporter activity	12/117	291/18866	2.62e-07	2.88e-06	1.33e-06	PPARG/GRIA2/BCL2/ADRB2/MMP9/APP/IFNG/ABCB1/CAV1/GJA1/CCL2/PON1	12
BP	GO:0071478	cellular response to radiation	10/117	188/18866	2.69e-07	2.95e-06	1.37e-06	PTGS2/MAPK14/BCL2L1/CDKN1A/CASP9/TP53/MDM2/HSPA5/MYC/PARP1	10
BP	GO:0061180	mammary gland epithelium development	7/117	71/18866	2.82e-07	3.08e-06	1.43e-06	AR/ESR1/PGR/AKT1/CCND1/MAPK1/HIF1A	7
BP	GO:0001660	fever generation	4/117	10/18866	2.87e-07	3.12e-06	1.44e-06	PTGS2/IL1B/PTGER3/IL1A	4
BP	GO:0034976	response to endoplasmic reticulum stress	12/117	294/18866	2.93e-07	3.18e-06	1.47e-06	GSK3B/BCL2/JUN/ALOX5/CCND1/BCL2L1/TP53/HSPA5/CAV1/CCL2/CXCL8/NFE2L2	12
BP	GO:0033135	regulation of peptidyl-serine phosphorylation	9/117	145/18866	2.98e-07	3.23e-06	1.49e-06	PTGS2/AKT1/BCL2/EGFR/VEGFA/APP/IFNG/RAF1/CAV1	9
BP	GO:0010821	regulation of mitochondrion organization	10/117	191/18866	3.12e-07	3.36e-06	1.55e-06	KDR/GSK3B/AKT1/BCL2/MAPK8/BCL2L1/MMP9/TP53/HIF1A/CASP8	10
BP	GO:0014812	muscle cell migration	8/117	106/18866	3.12e-07	3.36e-06	1.55e-06	BCL2/GSTP1/PLAU/MDM2/PLAT/SERPINE1/NFE2L2/IGFBP3	8
BP	GO:0032091	negative regulation of protein binding	8/117	106/18866	3.12e-07	3.36e-06	1.55e-06	GSK3B/AKT1/MAPK8/SLPI/ADRB2/CDKN1A/MET/CAV1	8
BP	GO:0051348	negative regulation of transferase activity	12/117	296/18866	3.15e-07	3.37e-06	1.56e-06	PPARG/GSK3B/AKT1/CASP3/GSTP1/CDKN1A/RB1/TP53/IFNG/CAV1/IL1B/HSPB1	12
BP	GO:0036003	positive regulation of transcription from RNA polymerase II promoter in response to stress	5/117	24/18866	3.26e-07	3.48e-06	1.61e-06	VEGFA/TP53/HIF1A/HSPA5/NFE2L2	5
BP	GO:0051592	response to calcium ion	9/117	147/18866	3.35e-07	3.55e-06	1.64e-06	SCN5A/JUN/EGFR/CCND1/PTGES/DPEP1/FOS/HSPA5/CAV1	9
BP	GO:0055123	digestive system development	9/117	147/18866	3.35e-07	3.55e-06	1.64e-06	BCL2/CYP1A1/EGFR/CDKN1A/RB1/HIF1A/CXCL8/COL3A1/IGF2	9
BP	GO:0001558	regulation of cell growth	14/117	420/18866	3.39e-07	3.59e-06	1.66e-06	ESR2/PPARG/GSK3B/AKT1/BCL2/EGFR/VEGFA/CDKN1A/RB1/TP53/ERBB2/GJA1/SPP1/IGFBP3	14
BP	GO:0050867	positive regulation of cell activation	14/117	421/18866	3.48e-07	3.67e-06	1.7e-06	DPP4/AKT1/BCL2/VCAM1/CDKN1A/IL2RA/IFNG/IL4/CD40LG/CAV1/IL1B/CCL2/IL1A/IGF2	14
BP	GO:0032386	regulation of intracellular transport	13/117	358/18866	3.48e-07	3.67e-06	1.7e-06	PTGS2/MAPK14/GSK3B/BCL2/MAPK8/CDK1/MAPK1/TP53/MDM2/ERBB2/IFNG/CASP8/IL1B	13
BP	GO:0016049	cell growth	15/117	490/18866	3.71e-07	3.9e-06	1.8e-06	ESR2/PPARG/GSK3B/AKT1/BCL2/EGFR/VEGFA/CDKN1A/RB1/TP53/APP/ERBB2/GJA1/SPP1/IGFBP3	15
BP	GO:0042098	T cell proliferation	10/117	195/18866	3.78e-07	3.95e-06	1.82e-06	CASP3/VCAM1/TP53/ERBB2/IL2RA/IL4/CD40LG/IL1B/IL1A/IGF2	10
BP	GO:1905475	regulation of protein localization to membrane	10/117	195/18866	3.78e-07	3.95e-06	1.82e-06	AR/AKT1/BCL2/MAPK8/EGFR/BCL2L1/TP53/ERBB2/IFNG/CASP8	10
BP	GO:0006606	protein import into nucleus	9/117	150/18866	3.97e-07	4.14e-06	1.91e-06	PTGS2/MAPK14/AKT1/CDK1/CDKN1A/MAPK1/TP53/NFKBIA/IFNG	9
BP	GO:0035924	cellular response to vascular endothelial growth factor stimulus	7/117	75/18866	4.12e-07	4.28e-06	1.98e-06	KDR/MAPK14/RELA/AKT1/VEGFA/VEGFC/HSPB1	7
BP	GO:0070849	response to epidermal growth factor	6/117	47/18866	4.36e-07	4.52e-06	2.09e-06	AKT1/GSTP1/EGFR/MAPK1/ERBB2/COL1A1	6
BP	GO:0033483	gas homeostasis	4/117	11/18866	4.48e-07	4.63e-06	2.14e-06	GSTP1/HIF1A/SOD2/CAV1	4
BP	GO:0009409	response to cold	6/117	48/18866	4.96e-07	5.08e-06	2.35e-06	PPARG/ADRB2/NFKBIA/FOS/CASP8/CXCL10	6
BP	GO:1904036	negative regulation of epithelial cell apoptotic process	6/117	48/18866	4.96e-07	5.08e-06	2.35e-06	KDR/HMOX1/ICAM1/IL4/SERPINE1/NFE2L2	6
BP	GO:2001239	regulation of extrinsic apoptotic signaling pathway in absence of ligand	6/117	48/18866	4.96e-07	5.08e-06	2.35e-06	AKT1/BCL2/BCL2L1/MCL1/IL1B/IL1A	6
BP	GO:0010952	positive regulation of peptidase activity	10/117	201/18866	5e-07	5.11e-06	2.36e-06	PPARG/MAPK14/CASP9/APP/CASP8/CAV1/MYC/F3/CLDN4/CTSD	10
BP	GO:0032963	collagen metabolic process	8/117	113/18866	5.11e-07	5.21e-06	2.41e-06	PPARG/MMP1/MMP2/MMP9/HIF1A/MMP3/COL1A1/CTSD	8
BP	GO:0048754	branching morphogenesis of an epithelial tube	9/117	155/18866	5.24e-07	5.33e-06	2.46e-06	AR/KDR/ESR1/PGR/BCL2/VEGFA/MET/EGF/MYC	9
BP	GO:0061045	negative regulation of wound healing	7/117	78/18866	5.41e-07	5.48e-06	2.53e-06	ALOX5/PLAU/GJA1/NOS3/PLAT/THBD/SERPINE1	7
BP	GO:0002673	regulation of acute inflammatory response	6/117	49/18866	5.62e-07	5.69e-06	2.63e-06	PTGS2/PPARG/GSTP1/IL4/IL1B/PTGER3	6
BP	GO:0043620	regulation of DNA-templated transcription in response to stress	8/117	115/18866	5.85e-07	5.9e-06	2.73e-06	RELA/JUN/HMOX1/VEGFA/TP53/HIF1A/HSPA5/NFE2L2	8
BP	GO:0030168	platelet activation	9/117	158/18866	6.16e-07	6.19e-06	2.86e-06	MAPK1/CD40LG/RAF1/PRKCB/NOS3/HSPB1/THBD/COL1A1/COL3A1	9
BP	GO:0045981	positive regulation of nucleotide metabolic process	6/117	50/18866	6.36e-07	6.36e-06	2.94e-06	NOS2/APP/IFNG/IL4/HIF1A/NOS3	6
BP	GO:1900544	positive regulation of purine nucleotide metabolic process	6/117	50/18866	6.36e-07	6.36e-06	2.94e-06	NOS2/APP/IFNG/IL4/HIF1A/NOS3	6
BP	GO:1900182	positive regulation of protein localization to nucleus	7/117	80/18866	6.44e-07	6.42e-06	2.97e-06	PTGS2/MAPK14/AKT1/CDK1/MAPK1/IFNG/PARP1	7
BP	GO:0051341	regulation of oxidoreductase activity	8/117	117/18866	6.68e-07	6.64e-06	3.07e-06	AKT1/EGFR/IFNG/HIF1A/CAV1/IL1B/NOS3/IL1A	8
BP	GO:0034644	cellular response to UV	7/117	81/18866	7.01e-07	6.95e-06	3.21e-06	PTGS2/CDKN1A/CASP9/TP53/MDM2/MYC/PARP1	7
BP	GO:0007569	cell aging	8/117	118/18866	7.13e-07	7.04e-06	3.26e-06	MAPK14/BCL2/CDK1/ICAM1/CDKN1A/TP53/SOD1/SERPINE1	8
BP	GO:0006984	ER-nucleus signaling pathway	6/117	51/18866	7.17e-07	7.04e-06	3.26e-06	GSK3B/TP53/HSPA5/CCL2/CXCL8/NFE2L2	6
BP	GO:0048146	positive regulation of fibroblast proliferation	6/117	51/18866	7.17e-07	7.04e-06	3.26e-06	ESR1/JUN/EGFR/CDKN1A/CDK4/MYC	6
BP	GO:1902893	regulation of pri-miRNA transcription by RNA polymerase II	6/117	51/18866	7.17e-07	7.04e-06	3.26e-06	PPARG/RELA/JUN/TP53/HIF1A/FOS	6
BP	GO:1901990	regulation of mitotic cell cycle phase transition	14/117	448/18866	7.33e-07	7.17e-06	3.32e-06	CDK2/AKT1/BCL2/CDK1/CYP1A1/EGFR/CCND1/CDKN1A/RB1/CDK4/TP53/MDM2/APP/CCL2	14
BP	GO:0030194	positive regulation of blood coagulation	5/117	28/18866	7.38e-07	7.17e-06	3.32e-06	F7/F3/THBD/SERPINE1/NFE2L2	5
BP	GO:1900048	positive regulation of hemostasis	5/117	28/18866	7.38e-07	7.17e-06	3.32e-06	F7/F3/THBD/SERPINE1/NFE2L2	5
BP	GO:1990776	response to angiotensin	5/117	28/18866	7.38e-07	7.17e-06	3.32e-06	PTGS2/RELA/CA2/CAV1/NFE2L2	5
BP	GO:0010822	positive regulation of mitochondrion organization	8/117	119/18866	7.6e-07	7.37e-06	3.41e-06	KDR/GSK3B/BCL2/MAPK8/MMP9/TP53/HIF1A/CASP8	8
BP	GO:0043406	positive regulation of MAP kinase activity	11/117	264/18866	7.67e-07	7.41e-06	3.43e-06	MAPK14/CDK1/EGFR/VEGFA/MAPK1/ERBB2/CD40LG/EGF/RAF1/SOD1/IL1B	11
BP	GO:0043393	regulation of protein binding	10/117	211/18866	7.79e-07	7.52e-06	3.47e-06	GSK3B/AKT1/MAPK8/SLPI/ADRB2/CDKN1A/MMP9/APP/MET/CAV1	10
BP	GO:1901215	negative regulation of neuron death	10/117	212/18866	8.14e-07	7.83e-06	3.62e-06	GSK3B/AKT1/BCL2/JUN/HMOX1/BCL2L1/HIF1A/SOD2/SOD1/CCL2	10
BP	GO:0070371	ERK1 and ERK2 cascade	12/117	325/18866	8.49e-07	8.15e-06	3.77e-06	KDR/JUN/ICAM1/GSTP1/EGFR/MAPK1/APP/ERBB2/EGF/MYC/IL1B/CCL2	12
BP	GO:0050820	positive regulation of coagulation	5/117	29/18866	8.87e-07	8.49e-06	3.93e-06	F7/F3/THBD/SERPINE1/NFE2L2	5
BP	GO:0061614	pri-miRNA transcription by RNA polymerase II	6/117	53/18866	9.05e-07	8.64e-06	3.99e-06	PPARG/RELA/JUN/TP53/HIF1A/FOS	6
BP	GO:0042692	muscle cell differentiation	13/117	390/18866	9.15e-07	8.72e-06	4.03e-06	MAPK14/AKT1/BCL2/CASP3/CDK1/VEGFA/RB1/MDM2/IL4/SOD2/CXCL10/CHUK/IGF2	13
BP	GO:1990266	neutrophil migration	8/117	122/18866	9.19e-07	8.73e-06	4.03e-06	DPP4/DPEP1/IL1B/CCL2/CXCL8/CXCL11/CXCL2/CXCL10	8
BP	GO:0002761	regulation of myeloid leukocyte differentiation	8/117	123/18866	9.78e-07	9.26e-06	4.28e-06	JUN/RB1/IFNG/IL4/CA2/FOS/CASP8/MYC	8
BP	GO:0042129	regulation of T cell proliferation	9/117	167/18866	9.8e-07	9.27e-06	4.28e-06	CASP3/VCAM1/ERBB2/IL2RA/IL4/CD40LG/IL1B/IL1A/IGF2	9
BP	GO:0001655	urogenital system development	12/117	330/18866	9.97e-07	9.4e-06	4.34e-06	AR/ESR1/AKR1B1/BCL2/STAT1/VEGFA/CASP9/MMP9/IL6R/CA2/ODC1/MYC	12
BP	GO:0060562	epithelial tube morphogenesis	12/117	331/18866	1.03e-06	9.67e-06	4.47e-06	AR/KDR/ESR1/PGR/BCL2/CASP3/VEGFA/MET/HIF1A/EGF/MYC/CXCL10	12
BP	GO:0014910	regulation of smooth muscle cell migration	7/117	86/18866	1.06e-06	9.89e-06	4.57e-06	BCL2/GSTP1/PLAU/MDM2/SERPINE1/NFE2L2/IGFBP3	7
BP	GO:0043457	regulation of cellular respiration	5/117	30/18866	1.06e-06	9.89e-06	4.57e-06	NOS2/CDK1/IFNG/IL4/HIF1A	5
BP	GO:0071480	cellular response to gamma radiation	5/117	30/18866	1.06e-06	9.89e-06	4.57e-06	BCL2L1/CDKN1A/TP53/MDM2/HSPA5	5
BP	GO:0042176	regulation of protein catabolic process	13/117	397/18866	1.12e-06	1.04e-05	4.81e-06	NOS2/GSK3B/RELA/AKT1/EGFR/MDM2/IFNG/EGF/ODC1/CAV1/GJA1/IL1B/NFE2L2	13
BP	GO:0051170	import into nucleus	9/117	171/18866	1.19e-06	1.11e-05	5.13e-06	PTGS2/MAPK14/AKT1/CDK1/CDKN1A/MAPK1/TP53/NFKBIA/IFNG	9
BP	GO:1900180	regulation of protein localization to nucleus	8/117	127/18866	1.25e-06	1.15e-05	5.33e-06	PTGS2/MAPK14/GSK3B/AKT1/CDK1/MAPK1/IFNG/PARP1	8
BP	GO:1905477	positive regulation of protein localization to membrane	8/117	127/18866	1.25e-06	1.15e-05	5.33e-06	AKT1/BCL2/MAPK8/EGFR/TP53/ERBB2/IFNG/CASP8	8
BP	GO:0016485	protein processing	10/117	223/18866	1.29e-06	1.19e-05	5.49e-06	F7/CASP3/PLAU/MDM2/XIAP/CASP8/F3/PLAT/SERPINE1/PARP1	10
BP	GO:0033209	tumor necrosis factor-mediated signaling pathway	9/117	173/18866	1.32e-06	1.21e-05	5.6e-06	RELA/IKBKB/STAT1/GSTP1/TP53/NFKBIA/CD40LG/CASP8/CHUK	9
BP	GO:0001541	ovarian follicle development	6/117	57/18866	1.4e-06	1.29e-05	5.94e-06	ESR1/BCL2/ICAM1/VEGFA/BCL2L1/SOD1	6
BP	GO:0045930	negative regulation of mitotic cell cycle	12/117	341/18866	1.4e-06	1.29e-05	5.94e-06	CDK2/BCL2/CDK1/EGFR/CCND1/BCL2L1/CDKN1A/RB1/CDK4/TP53/MDM2/CCL2	12
BP	GO:1901568	fatty acid derivative metabolic process	9/117	175/18866	1.45e-06	1.32e-05	6.11e-06	PTGS2/PTGS1/CYP1A1/ALOX5/GSTP1/PTGES/DPEP1/IL1B/PON1	9
BP	GO:0010165	response to X-ray	5/117	32/18866	1.48e-06	1.35e-05	6.24e-06	CASP3/CCND1/CDKN1A/TP53/THBD	5
BP	GO:0016241	regulation of macroautophagy	9/117	176/18866	1.52e-06	1.38e-05	6.38e-06	KDR/AKT1/CASP3/MAPK8/HMOX1/ADRB2/TP53/IL4/HIF1A	9
BP	GO:0051899	membrane depolarization	7/117	91/18866	1.55e-06	1.4e-05	6.47e-06	SCN5A/KDR/BCL2/JUN/KCNH2/CAV1/PARP1	7
BP	GO:0002763	positive regulation of myeloid leukocyte differentiation	6/117	58/18866	1.56e-06	1.4e-05	6.47e-06	JUN/RB1/IFNG/CA2/FOS/CASP8	6
BP	GO:1900408	negative regulation of cellular response to oxidative stress	6/117	58/18866	1.56e-06	1.4e-05	6.47e-06	AKT1/MET/HIF1A/SOD2/HSPB1/NFE2L2	6
BP	GO:1903202	negative regulation of oxidative stress-induced cell death	6/117	58/18866	1.56e-06	1.4e-05	6.47e-06	AKT1/MET/HIF1A/SOD2/HSPB1/NFE2L2	6
BP	GO:0043270	positive regulation of ion transport	11/117	284/18866	1.57e-06	1.41e-05	6.5e-06	SCN5A/AKT1/ADRB2/KCNH2/IFNG/ABCB1/CAV1/IL1B/CCL2/CXCL11/CXCL10	11
BP	GO:0006636	unsaturated fatty acid biosynthetic process	6/117	59/18866	1.72e-06	1.54e-05	7.1e-06	PTGS2/PTGS1/ALOX5/GSTP1/PTGES/IL1B	6
BP	GO:0043525	positive regulation of neuron apoptotic process	6/117	59/18866	1.72e-06	1.54e-05	7.1e-06	JUN/CASP3/CASP9/TP53/MCL1/NQO1	6
BP	GO:0045454	cell redox homeostasis	6/117	59/18866	1.72e-06	1.54e-05	7.1e-06	NOS2/NCF1/NOS3/MPO/NFE2L2/NQO1	6
BP	GO:0021700	developmental maturation	11/117	287/18866	1.74e-06	1.54e-05	7.13e-06	PPARG/AKR1B1/PGR/BCL2/VEGFA/CDKN1A/MMP2/RB1/APP/HIF1A/RUNX2	11
BP	GO:0051051	negative regulation of transport	14/117	483/18866	1.78e-06	1.58e-05	7.3e-06	PTGS2/AKT1/BCL2/HMOX1/ICAM1/KCNH2/MMP9/EGF/CAV1/GJA1/IL1B/PTGER3/PRKCB/NOS3	14
BP	GO:0090594	inflammatory response to wounding	4/117	15/18866	1.82e-06	1.61e-05	7.43e-06	HMOX1/ALOX5/HIF1A/IL1A	4
BP	GO:2001028	positive regulation of endothelial cell chemotaxis	4/117	15/18866	1.82e-06	1.61e-05	7.43e-06	KDR/VEGFA/MET/HSPB1	4
BP	GO:0019229	regulation of vasoconstriction	6/117	60/18866	1.91e-06	1.67e-05	7.71e-06	PTGS2/AKT1/ICAM1/EGFR/CAV1/GJA1	6
BP	GO:0043388	positive regulation of DNA binding	6/117	60/18866	1.91e-06	1.67e-05	7.71e-06	PPARG/MMP9/RB1/IFNG/EGF/PARP1	6
BP	GO:0061900	glial cell activation	6/117	60/18866	1.91e-06	1.67e-05	7.71e-06	JUN/EGFR/APP/IFNG/IL4/IL1B	6
BP	GO:1902883	negative regulation of response to oxidative stress	6/117	60/18866	1.91e-06	1.67e-05	7.71e-06	AKT1/MET/HIF1A/SOD2/HSPB1/NFE2L2	6
BP	GO:1901987	regulation of cell cycle phase transition	14/117	486/18866	1.91e-06	1.67e-05	7.72e-06	CDK2/AKT1/BCL2/CDK1/CYP1A1/EGFR/CCND1/CDKN1A/RB1/CDK4/TP53/MDM2/APP/CCL2	14
BP	GO:0003158	endothelium development	8/117	135/18866	1.98e-06	1.71e-05	7.92e-06	KDR/IKBKB/ICAM1/VEGFA/MET/GJA1/IL1B/CXCL10	8
BP	GO:0032368	regulation of lipid transport	8/117	135/18866	1.98e-06	1.71e-05	7.92e-06	PPARG/AKT1/NFKBIA/EGF/CAV1/IL1B/SPP1/PON1	8
BP	GO:0048565	digestive tract development	8/117	135/18866	1.98e-06	1.71e-05	7.92e-06	BCL2/CYP1A1/EGFR/CDKN1A/RB1/HIF1A/CXCL8/COL3A1	8
BP	GO:2000352	negative regulation of endothelial cell apoptotic process	5/117	34/18866	2.03e-06	1.75e-05	8.11e-06	KDR/ICAM1/IL4/SERPINE1/NFE2L2	5
BP	GO:0006913	nucleocytoplasmic transport	12/117	354/18866	2.07e-06	1.79e-05	8.27e-06	PTGS2/MAPK14/GSK3B/AKT1/CDK1/CDKN1A/MAPK1/TP53/NFKBIA/MDM2/IFNG/IL1B	12
BP	GO:0001959	regulation of cytokine-mediated signaling pathway	9/117	183/18866	2.1e-06	1.81e-05	8.35e-06	PPARG/IKBKB/STAT1/GSTP1/IFNG/HIF1A/CASP8/CAV1/CHUK	9
BP	GO:0090303	positive regulation of wound healing	6/117	61/18866	2.1e-06	1.81e-05	8.35e-06	F7/F3/THBD/SERPINE1/NFE2L2/CLDN4	6
BP	GO:0032872	regulation of stress-activated MAPK cascade	10/117	237/18866	2.23e-06	1.91e-05	8.84e-06	NCF1/AKT1/GSTP1/EGFR/VEGFA/MAPK1/APP/CD40LG/MYC/IL1B	10
BP	GO:0051169	nuclear transport	12/117	357/18866	2.26e-06	1.93e-05	8.93e-06	PTGS2/MAPK14/GSK3B/AKT1/CDK1/CDKN1A/MAPK1/TP53/NFKBIA/MDM2/IFNG/IL1B	12
BP	GO:0051146	striated muscle cell differentiation	11/117	295/18866	2.27e-06	1.93e-05	8.93e-06	MAPK14/AKT1/BCL2/CASP3/CDK1/VEGFA/RB1/IL4/CXCL10/CHUK/IGF2	11
BP	GO:2001244	positive regulation of intrinsic apoptotic signaling pathway	6/117	62/18866	2.32e-06	1.97e-05	9.11e-06	BCL2/BCL2L1/TP53/MCL1/SOD1/CAV1	6
BP	GO:1901030	positive regulation of mitochondrial outer membrane permeabilization involved in apoptotic signaling pathway	5/117	35/18866	2.36e-06	2e-05	9.25e-06	GSK3B/BCL2/MAPK8/TP53/CASP8	5
BP	GO:0071674	mononuclear cell migration	7/117	97/18866	2.39e-06	2.02e-05	9.33e-06	MAPK14/MAPK1/IL6R/IL4/CCL2/SERPINE1/CXCL10	7
BP	GO:1901184	regulation of ERBB signaling pathway	7/117	97/18866	2.39e-06	2.02e-05	9.33e-06	NCF1/AKT1/EGFR/MMP9/APP/ERBB2/EGF	7
BP	GO:0002070	epithelial cell maturation	4/117	16/18866	2.41e-06	2.03e-05	9.39e-06	AKR1B1/PGR/CDKN1A/HIF1A	4
BP	GO:0051770	positive regulation of nitric-oxide synthase biosynthetic process	4/117	16/18866	2.41e-06	2.03e-05	9.39e-06	KDR/STAT1/IFNG/CCL2	4
BP	GO:0070302	regulation of stress-activated protein kinase signaling cascade	10/117	240/18866	2.5e-06	2.1e-05	9.69e-06	NCF1/AKT1/GSTP1/EGFR/VEGFA/MAPK1/APP/CD40LG/MYC/IL1B	10
BP	GO:0061138	morphogenesis of a branching epithelium	9/117	187/18866	2.51e-06	2.1e-05	9.71e-06	AR/KDR/ESR1/PGR/BCL2/VEGFA/MET/EGF/MYC	9
BP	GO:0031571	mitotic G1 DNA damage checkpoint	6/117	63/18866	2.55e-06	2.13e-05	9.84e-06	CDK2/CDK1/CCND1/CDKN1A/TP53/MDM2	6
BP	GO:0043123	positive regulation of I-kappaB kinase/NF-kappaB signaling	9/117	188/18866	2.62e-06	2.18e-05	1.01e-05	RELA/IKBKB/AKT1/HMOX1/CASP8/GJA1/IL1B/PRKCB/CHUK	9
BP	GO:0001893	maternal placenta development	5/117	36/18866	2.72e-06	2.27e-05	1.05e-05	PTGS2/AKT1/MAPK1/GJA1/SPP1	5
BP	GO:0044783	G1 DNA damage checkpoint	6/117	64/18866	2.8e-06	2.32e-05	1.07e-05	CDK2/CDK1/CCND1/CDKN1A/TP53/MDM2	6
BP	GO:0044819	mitotic G1/S transition checkpoint	6/117	64/18866	2.8e-06	2.32e-05	1.07e-05	CDK2/CDK1/CCND1/CDKN1A/TP53/MDM2	6
BP	GO:0035265	organ growth	9/117	191/18866	2.98e-06	2.47e-05	1.14e-05	AR/ESR1/MAPK14/AKT1/BCL2/CDK1/MAPK1/SOD1/GJA1	9
BP	GO:0030098	lymphocyte differentiation	12/117	368/18866	3.09e-06	2.55e-05	1.18e-05	BCL2/VCAM1/TP53/ERBB2/IL2RA/IFNG/IL4/CD40LG/SOD1/IL1B/IL1A/RUNX2	12
BP	GO:0042102	positive regulation of T cell proliferation	7/117	101/18866	3.13e-06	2.57e-05	1.19e-05	VCAM1/IL2RA/IL4/CD40LG/IL1B/IL1A/IGF2	7
BP	GO:2000273	positive regulation of signaling receptor activity	5/117	37/18866	3.13e-06	2.57e-05	1.19e-05	NCF1/ADRB2/IFNG/EGF/CCL2	5
BP	GO:0038127	ERBB signaling pathway	8/117	145/18866	3.38e-06	2.77e-05	1.28e-05	NCF1/AKT1/EGFR/MMP9/MAPK1/APP/ERBB2/EGF	8
BP	GO:0007219	Notch signaling pathway	9/117	195/18866	3.54e-06	2.89e-05	1.33e-05	AKT1/STAT1/EGFR/NFKBIA/APP/IL2RA/EGF/MYC/NOS3	9
BP	GO:0050731	positive regulation of peptidyl-tyrosine phosphorylation	9/117	195/18866	3.54e-06	2.89e-05	1.33e-05	NCF1/ICAM1/VEGFA/IL6R/TP53/IFNG/IL4/EGF/IGF2	9
BP	GO:0008630	intrinsic apoptotic signaling pathway in response to DNA damage	7/117	103/18866	3.57e-06	2.91e-05	1.34e-05	BCL2/HMOX1/BCL2L1/CDKN1A/CASP9/TP53/MCL1	7
BP	GO:0060759	regulation of response to cytokine stimulus	9/117	196/18866	3.69e-06	3e-05	1.38e-05	PPARG/IKBKB/STAT1/GSTP1/IFNG/HIF1A/CASP8/CAV1/CHUK	9
BP	GO:1901991	negative regulation of mitotic cell cycle phase transition	10/117	251/18866	3.72e-06	3.02e-05	1.4e-05	CDK2/BCL2/CDK1/CCND1/CDKN1A/RB1/CDK4/TP53/MDM2/CCL2	10
BP	GO:0043279	response to alkaloid	7/117	104/18866	3.81e-06	3.08e-05	1.42e-05	PPARG/RELA/CASP3/ICAM1/BCL2L1/MDM2/HSPA5	7
BP	GO:0071901	negative regulation of protein serine/threonine kinase activity	8/117	148/18866	3.93e-06	3.18e-05	1.47e-05	AKT1/CASP3/GSTP1/CDKN1A/RB1/CAV1/IL1B/HSPB1	8
BP	GO:0030217	T cell differentiation	10/117	253/18866	4e-06	3.2e-05	1.48e-05	BCL2/TP53/ERBB2/IL2RA/IFNG/IL4/SOD1/IL1B/IL1A/RUNX2	10
BP	GO:0051924	regulation of calcium ion transport	10/117	253/18866	4e-06	3.2e-05	1.48e-05	PTGS2/BCL2/ICAM1/EGF/CAV1/GJA1/CCL2/NOS3/CXCL11/CXCL10	10
BP	GO:0040014	regulation of multicellular organism growth	6/117	68/18866	4e-06	3.2e-05	1.48e-05	BCL2/ADRB2/CDK4/APP/SOD1/IGF2	6
BP	GO:0045428	regulation of nitric oxide biosynthetic process	6/117	68/18866	4e-06	3.2e-05	1.48e-05	PTGS2/AKT1/ICAM1/IFNG/CAV1/IL1B	6
BP	GO:0071479	cellular response to ionizing radiation	6/117	68/18866	4e-06	3.2e-05	1.48e-05	MAPK14/BCL2L1/CDKN1A/TP53/MDM2/HSPA5	6
BP	GO:1904706	negative regulation of vascular associated smooth muscle cell proliferation	5/117	39/18866	4.1e-06	3.26e-05	1.51e-05	PPARG/HMOX1/GSTP1/CDKN1A/SOD2	5
BP	GO:0043524	negative regulation of neuron apoptotic process	8/117	149/18866	4.13e-06	3.29e-05	1.52e-05	BCL2/JUN/HMOX1/BCL2L1/HIF1A/SOD2/SOD1/CCL2	8
BP	GO:0045926	negative regulation of growth	10/117	254/18866	4.14e-06	3.29e-05	1.52e-05	ESR2/PPARG/BCL2/ADRB2/CDKN1A/RB1/TP53/HIF1A/GJA1/SPP1	10
BP	GO:0071156	regulation of cell cycle arrest	7/117	106/18866	4.32e-06	3.42e-05	1.58e-05	CDK2/CDK1/CCND1/CDKN1A/CDK4/TP53/MDM2	7
BP	GO:0043254	regulation of protein-containing complex assembly	13/117	449/18866	4.33e-06	3.42e-05	1.58e-05	ESR1/GSK3B/MMP1/ICAM1/VEGFA/RB1/TP53/IFNG/MET/MMP3/RAF1/HSPA5/PARP1	13
BP	GO:0035264	multicellular organism growth	8/117	150/18866	4.35e-06	3.42e-05	1.58e-05	AR/BCL2/ADRB2/CDK4/TP53/APP/SOD1/IGF2	8
BP	GO:0017038	protein import	9/117	200/18866	4.35e-06	3.42e-05	1.58e-05	PTGS2/MAPK14/AKT1/CDK1/CDKN1A/MAPK1/TP53/NFKBIA/IFNG	9
BP	GO:0042698	ovulation cycle	6/117	69/18866	4.36e-06	3.42e-05	1.58e-05	ESR1/PGR/CASP3/EGFR/HSPA5/NOS3	6
BP	GO:0001763	morphogenesis of a branching structure	9/117	201/18866	4.53e-06	3.55e-05	1.64e-05	AR/KDR/ESR1/PGR/BCL2/VEGFA/MET/EGF/MYC	9
BP	GO:0031334	positive regulation of protein-containing complex assembly	10/117	257/18866	4.59e-06	3.59e-05	1.66e-05	ESR1/GSK3B/MMP1/ICAM1/VEGFA/TP53/IFNG/MET/MMP3/PARP1	10
BP	GO:1903426	regulation of reactive oxygen species biosynthetic process	7/117	107/18866	4.6e-06	3.59e-05	1.66e-05	PTGS2/AKT1/ICAM1/ALOX5/IFNG/CAV1/IL1B	7
BP	GO:0042307	positive regulation of protein import into nucleus	5/117	40/18866	4.66e-06	3.62e-05	1.67e-05	PTGS2/MAPK14/CDK1/MAPK1/IFNG	5
BP	GO:0045740	positive regulation of DNA replication	5/117	40/18866	4.66e-06	3.62e-05	1.67e-05	CDK2/JUN/CDK1/EGFR/EGF	5
BP	GO:0031349	positive regulation of defense response	12/117	385/18866	4.91e-06	3.81e-05	1.76e-05	PTGS2/RELA/IKBKB/EGFR/NFKBIA/IFNG/RAF1/GJA1/IL1B/PTGER3/SERPINE1/CHUK	12
BP	GO:0019932	second-messenger-mediated signaling	13/117	456/18866	5.11e-06	3.96e-05	1.83e-05	NOS2/KDR/GSK3B/SELE/VCAM1/ADRB2/EGFR/VEGFA/PTGER3/CXCL8/NOS3/CXCL11/CXCL10	13
BP	GO:0043618	regulation of transcription from RNA polymerase II promoter in response to stress	7/117	109/18866	5.21e-06	4.02e-05	1.86e-05	JUN/HMOX1/VEGFA/TP53/HIF1A/HSPA5/NFE2L2	7
BP	GO:0002262	myeloid cell homeostasis	8/117	154/18866	5.28e-06	4.07e-05	1.88e-05	MAPK14/CASP3/STAT1/HMOX1/VEGFA/RB1/HIF1A/SOD1	8
BP	GO:0009895	negative regulation of catabolic process	11/117	323/18866	5.4e-06	4.16e-05	1.92e-05	NOS2/MAPK14/RELA/AKT1/BCL2/HMOX1/EGFR/TP53/MCL1/MET/IL1B	11
BP	GO:0042594	response to starvation	9/117	206/18866	5.53e-06	4.24e-05	1.96e-05	PPARG/BCL2/JUN/MAPK8/CDKN1A/MAPK1/TP53/HSPA5/NFE2L2	9
BP	GO:0071383	cellular response to steroid hormone stimulus	9/117	206/18866	5.53e-06	4.24e-05	1.96e-05	AR/ESR2/ESR1/PGR/ICAM1/GSTP1/EGFR/CASP9/PARP1	9
BP	GO:1904591	positive regulation of protein import	5/117	42/18866	5.96e-06	4.56e-05	2.11e-05	PTGS2/MAPK14/CDK1/MAPK1/IFNG	5
BP	GO:0030522	intracellular receptor signaling pathway	10/117	265/18866	6.02e-06	4.59e-05	2.12e-05	AR/ESR2/ESR1/PPARG/RELA/PGR/NFKBIA/XIAP/CASP8/PARP1	10
BP	GO:0002683	negative regulation of immune system process	13/117	463/18866	6.03e-06	4.59e-05	2.12e-05	DPP4/PPARG/AKT1/CASP3/HMOX1/NFKBIA/ERBB2/IL2RA/IL4/MYC/CCL2/NFE2L2/COL3A1	13
BP	GO:0043271	negative regulation of ion transport	8/117	157/18866	6.09e-06	4.63e-05	2.14e-05	PTGS2/AKT1/BCL2/ICAM1/KCNH2/MMP9/CAV1/NOS3	8
BP	GO:1902004	positive regulation of amyloid-beta formation	4/117	20/18866	6.3e-06	4.78e-05	2.21e-05	RELA/CASP3/APP/IFNG	4
BP	GO:0006109	regulation of carbohydrate metabolic process	9/117	210/18866	6.46e-06	4.89e-05	2.26e-05	GSK3B/AKT1/TP53/APP/IFNG/HIF1A/EGF/IGFBP3/IGF2	9
BP	GO:0006631	fatty acid metabolic process	12/117	396/18866	6.53e-06	4.94e-05	2.28e-05	PTGS2/PTGS1/PPARG/MAPK14/AKT1/CYP1A1/ALOX5/GSTP1/PTGES/CAV1/IL1B/PON1	12
BP	GO:0051881	regulation of mitochondrial membrane potential	6/117	74/18866	6.57e-06	4.94e-05	2.29e-05	KDR/AKT1/BCL2/BCL2L1/SOD1/PARP1	6
BP	GO:1903036	positive regulation of response to wounding	6/117	74/18866	6.57e-06	4.94e-05	2.29e-05	F7/F3/THBD/SERPINE1/NFE2L2/CLDN4	6
BP	GO:0003012	muscle system process	13/117	467/18866	6.61e-06	4.97e-05	2.3e-05	PTGS2/SCN5A/HMOX1/ADRB2/KCNH2/SOD1/CAV1/GJA1/IL1B/PTGER3/NOS3/PARP1/CHUK	13
BP	GO:0071364	cellular response to epidermal growth factor stimulus	5/117	43/18866	6.71e-06	5.02e-05	2.32e-05	AKT1/GSTP1/EGFR/ERBB2/COL1A1	5
BP	GO:0150077	regulation of neuroinflammatory response	5/117	43/18866	6.71e-06	5.02e-05	2.32e-05	PTGS2/MMP9/IL4/MMP3/IL1B	5
BP	GO:0030278	regulation of ossification	9/117	212/18866	6.98e-06	5.2e-05	2.4e-05	MAPK14/BCL2/ALOX5/ADRB2/MAPK1/IL6R/HIF1A/VEGFC/RUNX2	9
BP	GO:0051701	interaction with host	9/117	212/18866	6.98e-06	5.2e-05	2.4e-05	DPP4/CDK1/ICAM1/EGFR/BCL2L1/MET/CASP8/CAV1/CXCL8	9
BP	GO:1901988	negative regulation of cell cycle phase transition	10/117	270/18866	7.09e-06	5.28e-05	2.44e-05	CDK2/BCL2/CDK1/CCND1/CDKN1A/RB1/CDK4/TP53/MDM2/CCL2	10
BP	GO:0033077	T cell differentiation in thymus	6/117	76/18866	7.67e-06	5.67e-05	2.62e-05	BCL2/TP53/ERBB2/SOD1/IL1B/IL1A	6
BP	GO:0071229	cellular response to acid chemical	6/117	76/18866	7.67e-06	5.67e-05	2.62e-05	EGFR/VEGFA/BCL2L1/MMP2/COL1A1/COL3A1	6
BP	GO:1903524	positive regulation of blood circulation	6/117	76/18866	7.67e-06	5.67e-05	2.62e-05	PTGS2/AKT1/ICAM1/EGFR/CAV1/GJA1	6
BP	GO:0030728	ovulation	4/117	21/18866	7.75e-06	5.67e-05	2.62e-05	PTGS2/PGR/TNFAIP6/NOS3	4
BP	GO:0036499	PERK-mediated unfolded protein response	4/117	21/18866	7.75e-06	5.67e-05	2.62e-05	HSPA5/CCL2/CXCL8/NFE2L2	4
BP	GO:0046827	positive regulation of protein export from nucleus	4/117	21/18866	7.75e-06	5.67e-05	2.62e-05	GSK3B/TP53/MDM2/IL1B	4
BP	GO:0061042	vascular wound healing	4/117	21/18866	7.75e-06	5.67e-05	2.62e-05	KDR/ALOX5/VEGFA/SERPINE1	4
BP	GO:0140467	integrated stress response signaling	4/117	21/18866	7.75e-06	5.67e-05	2.62e-05	HSPA5/CCL2/CXCL8/NFE2L2	4
BP	GO:0009267	cellular response to starvation	8/117	163/18866	8.03e-06	5.87e-05	2.71e-05	BCL2/JUN/MAPK8/CDKN1A/MAPK1/TP53/HSPA5/NFE2L2	8
BP	GO:0046902	regulation of mitochondrial membrane permeability	6/117	77/18866	8.28e-06	6.04e-05	2.79e-05	GSK3B/BCL2/MAPK8/BCL2L1/TP53/CASP8	6
BP	GO:0007259	receptor signaling pathway via JAK-STAT	8/117	164/18866	8.39e-06	6.11e-05	2.82e-05	AKR1B1/STAT1/IL6R/IFNG/IL4/EGF/CAV1/CCL2	8
BP	GO:0035094	response to nicotine	5/117	45/18866	8.44e-06	6.11e-05	2.82e-05	RELA/BCL2/CASP3/HMOX1/MAPK1	5
BP	GO:0045429	positive regulation of nitric oxide biosynthetic process	5/117	45/18866	8.44e-06	6.11e-05	2.82e-05	PTGS2/AKT1/ICAM1/IFNG/IL1B	5
BP	GO:1901028	regulation of mitochondrial outer membrane permeabilization involved in apoptotic signaling pathway	5/117	45/18866	8.44e-06	6.11e-05	2.82e-05	GSK3B/BCL2/MAPK8/TP53/CASP8	5
BP	GO:0022898	regulation of transmembrane transporter activity	10/117	276/18866	8.6e-06	6.21e-05	2.87e-05	GRIA2/BCL2/ADRB2/MMP9/APP/IFNG/ABCB1/CAV1/GJA1/CCL2	10
BP	GO:0033559	unsaturated fatty acid metabolic process	7/117	118/18866	8.8e-06	6.34e-05	2.93e-05	PTGS2/PTGS1/CYP1A1/ALOX5/GSTP1/PTGES/IL1B	7
BP	GO:0042310	vasoconstriction	6/117	78/18866	8.93e-06	6.42e-05	2.97e-05	PTGS2/AKT1/ICAM1/EGFR/CAV1/GJA1	6
BP	GO:0000075	cell cycle checkpoint	9/117	219/18866	9.06e-06	6.51e-05	3.01e-05	MAPK14/CDK2/CDK1/CCND1/BCL2L1/CDKN1A/RB1/TP53/MDM2	9
BP	GO:0015980	energy derivation by oxidation of organic compounds	10/117	278/18866	9.16e-06	6.56e-05	3.03e-05	NOS2/GSK3B/AKT1/CDK1/TP53/IFNG/IL4/HIF1A/MYC/IGF2	10
BP	GO:0007093	mitotic cell cycle checkpoint	8/117	166/18866	9.17e-06	6.56e-05	3.03e-05	CDK2/CDK1/CCND1/BCL2L1/CDKN1A/RB1/TP53/MDM2	8
BP	GO:0048538	thymus development	5/117	46/18866	9.42e-06	6.71e-05	3.1e-05	BCL2/MAPK1/TYR/RAF1/SOD1	5
BP	GO:1904407	positive regulation of nitric oxide metabolic process	5/117	46/18866	9.42e-06	6.71e-05	3.1e-05	PTGS2/AKT1/ICAM1/IFNG/IL1B	5
BP	GO:0034250	positive regulation of cellular amide metabolic process	8/117	167/18866	9.59e-06	6.82e-05	3.15e-05	RELA/CASP3/MAPK1/CDK4/APP/ERBB2/IFNG/NFE2L2	8
BP	GO:1900542	regulation of purine nucleotide metabolic process	7/117	121/18866	1.04e-05	7.37e-05	3.41e-05	NOS2/APP/IFNG/IL4/HIF1A/NOS3/PARP1	7
BP	GO:0006953	acute-phase response	5/117	47/18866	1.05e-05	7.39e-05	3.42e-05	PTGS2/IL6R/IL1B/PTGER3/IL1A	5
BP	GO:0022602	ovulation cycle process	5/117	47/18866	1.05e-05	7.39e-05	3.42e-05	ESR1/PGR/CASP3/HSPA5/NOS3	5
BP	GO:0030574	collagen catabolic process	5/117	47/18866	1.05e-05	7.39e-05	3.42e-05	MMP1/MMP2/MMP9/MMP3/CTSD	5
BP	GO:0045776	negative regulation of blood pressure	5/117	47/18866	1.05e-05	7.39e-05	3.42e-05	NOS2/ADRB2/SOD2/VEGFC/NOS3	5
BP	GO:0001822	kidney development	10/117	283/18866	1.07e-05	7.53e-05	3.48e-05	AKR1B1/BCL2/STAT1/VEGFA/CASP9/MMP9/IL6R/CA2/ODC1/MYC	10
BP	GO:0034765	regulation of ion transmembrane transport	13/117	489/18866	1.08e-05	7.6e-05	3.51e-05	SCN5A/GRIA2/AKT1/ADRB2/KCNH2/MMP9/APP/IFNG/ABCB1/CAV1/CCL2/CXCL11/CXCL10	13
BP	GO:0021782	glial cell development	7/117	122/18866	1.1e-05	7.66e-05	3.54e-05	AKT1/GSTP1/EGFR/APP/IFNG/SOD1/IL1B	7
BP	GO:0045471	response to ethanol	7/117	122/18866	1.1e-05	7.66e-05	3.54e-05	CDK1/ICAM1/GSTP1/CCND1/CASP8/SOD1/NQO1	7
BP	GO:0001937	negative regulation of endothelial cell proliferation	6/117	81/18866	1.11e-05	7.76e-05	3.59e-05	PPARG/STAT1/ALOX5/CAV1/GJA1/CCL2	6
BP	GO:1904062	regulation of cation transmembrane transport	11/117	349/18866	1.12e-05	7.81e-05	3.61e-05	SCN5A/GRIA2/ADRB2/KCNH2/MMP9/APP/IFNG/CAV1/CCL2/CXCL11/CXCL10	11
BP	GO:0045732	positive regulation of protein catabolic process	9/117	225/18866	1.13e-05	7.83e-05	3.62e-05	GSK3B/AKT1/MDM2/IFNG/EGF/CAV1/GJA1/IL1B/NFE2L2	9
BP	GO:0031281	positive regulation of cyclase activity	4/117	23/18866	1.14e-05	7.87e-05	3.64e-05	NOS2/MAPK14/MAPK8/NOS3	4
BP	GO:1904996	positive regulation of leukocyte adhesion to vascular endothelial cell	4/117	23/18866	1.14e-05	7.87e-05	3.64e-05	RELA/ICAM1/SELE/ALOX5	4
BP	GO:1905952	regulation of lipid localization	8/117	171/18866	1.14e-05	7.88e-05	3.64e-05	PPARG/AKT1/NFKBIA/EGF/CAV1/IL1B/SPP1/PON1	8
BP	GO:0006140	regulation of nucleotide metabolic process	7/117	123/18866	1.16e-05	7.98e-05	3.69e-05	NOS2/APP/IFNG/IL4/HIF1A/NOS3/PARP1	7
BP	GO:2001020	regulation of response to DNA damage stimulus	9/117	226/18866	1.17e-05	8.04e-05	3.72e-05	BCL2/EGFR/BCL2L1/CASP9/TP53/MDM2/MCL1/MYC/PARP1	9
BP	GO:0050806	positive regulation of synaptic transmission	8/117	172/18866	1.19e-05	8.18e-05	3.78e-05	PTGS2/GSK3B/ADRB2/EGFR/MAPK1/APP/CA2/CCL2	8
BP	GO:0050708	regulation of protein secretion	11/117	352/18866	1.21e-05	8.34e-05	3.85e-05	NOS2/DPP4/ALOX5/EGFR/IFNG/CD40LG/HIF1A/VEGFC/GJA1/IL1B/IL1A	11
BP	GO:0034605	cellular response to heat	7/117	125/18866	1.28e-05	8.79e-05	4.06e-05	PTGS2/GSK3B/HMOX1/CDKN1A/MAPK1/IL1A/CXCL10	7
BP	GO:1903578	regulation of ATP metabolic process	7/117	125/18866	1.28e-05	8.79e-05	4.06e-05	CDK1/TP53/APP/IFNG/IL4/HIF1A/PARP1	7
BP	GO:0006692	prostanoid metabolic process	5/117	49/18866	1.29e-05	8.79e-05	4.06e-05	PTGS2/PTGS1/GSTP1/PTGES/IL1B	5
BP	GO:0006693	prostaglandin metabolic process	5/117	49/18866	1.29e-05	8.79e-05	4.06e-05	PTGS2/PTGS1/GSTP1/PTGES/IL1B	5
BP	GO:1900087	positive regulation of G1/S transition of mitotic cell cycle	5/117	49/18866	1.29e-05	8.79e-05	4.06e-05	AKT1/CYP1A1/EGFR/CCND1/MDM2	5
BP	GO:0097696	receptor signaling pathway via STAT	8/117	174/18866	1.29e-05	8.79e-05	4.06e-05	AKR1B1/STAT1/IL6R/IFNG/IL4/EGF/CAV1/CCL2	8
BP	GO:0060485	mesenchyme development	10/117	290/18866	1.32e-05	8.97e-05	4.15e-05	GSK3B/BCL2/STAT1/MAPK1/MDM2/HIF1A/MYC/IL1B/NOS3/COL1A1	10
BP	GO:0050680	negative regulation of epithelial cell proliferation	8/117	175/18866	1.35e-05	9.13e-05	4.22e-05	AR/PPARG/STAT1/ALOX5/RB1/CAV1/GJA1/CCL2	8
BP	GO:1902993	positive regulation of amyloid precursor protein catabolic process	4/117	24/18866	1.36e-05	9.17e-05	4.24e-05	RELA/CASP3/APP/IFNG	4
BP	GO:0045913	positive regulation of carbohydrate metabolic process	6/117	84/18866	1.37e-05	9.25e-05	4.27e-05	AKT1/APP/IFNG/HIF1A/EGF/IGF2	6
BP	GO:0072001	renal system development	10/117	292/18866	1.4e-05	9.45e-05	4.37e-05	AKR1B1/BCL2/STAT1/VEGFA/CASP9/MMP9/IL6R/CA2/ODC1/MYC	10
BP	GO:0030195	negative regulation of blood coagulation	5/117	50/18866	1.43e-05	9.56e-05	4.42e-05	PLAU/NOS3/PLAT/THBD/SERPINE1	5
BP	GO:1903580	positive regulation of ATP metabolic process	5/117	50/18866	1.43e-05	9.56e-05	4.42e-05	CDK1/APP/IFNG/IL4/HIF1A	5
BP	GO:1904707	positive regulation of vascular associated smooth muscle cell proliferation	5/117	50/18866	1.43e-05	9.56e-05	4.42e-05	JUN/MMP2/MMP9/MDM2/GJA1	5
BP	GO:0051604	protein maturation	10/117	293/18866	1.45e-05	9.66e-05	4.47e-05	F7/CASP3/PLAU/MDM2/XIAP/CASP8/F3/PLAT/SERPINE1/PARP1	10
BP	GO:0006970	response to osmotic stress	6/117	85/18866	1.47e-05	9.78e-05	4.52e-05	PTGS2/AKR1B1/CASP3/EGFR/TP53/ABCB1	6
BP	GO:0010507	negative regulation of autophagy	6/117	85/18866	1.47e-05	9.78e-05	4.52e-05	AKT1/BCL2/HMOX1/TP53/MCL1/MET	6
BP	GO:0009743	response to carbohydrate	9/117	233/18866	1.49e-05	9.9e-05	4.57e-05	PTGS2/CASP3/ICAM1/GSTP1/HIF1A/RAF1/GJA1/IL1B/PRKCB	9
BP	GO:0051897	positive regulation of protein kinase B signaling	8/117	178/18866	1.53e-05	0.00010127	4.68e-05	F7/ESR1/EGFR/ERBB2/MET/EGF/F3/IGF2	8
BP	GO:0097756	negative regulation of blood vessel diameter	6/117	86/18866	1.57e-05	0.000103618	4.79e-05	PTGS2/AKT1/ICAM1/EGFR/CAV1/GJA1	6
BP	GO:0071675	regulation of mononuclear cell migration	5/117	51/18866	1.57e-05	0.000103618	4.79e-05	MAPK14/MAPK1/IL4/SERPINE1/CXCL10	5
BP	GO:1900047	negative regulation of hemostasis	5/117	51/18866	1.57e-05	0.000103618	4.79e-05	PLAU/NOS3/PLAT/THBD/SERPINE1	5
BP	GO:0002576	platelet degranulation	7/117	129/18866	1.58e-05	0.000103618	4.79e-05	VEGFA/APP/VEGFC/EGF/SOD1/SERPINE1/IGF2	7
BP	GO:0034101	erythrocyte homeostasis	7/117	129/18866	1.58e-05	0.000103618	4.79e-05	MAPK14/CASP3/STAT1/HMOX1/VEGFA/RB1/HIF1A	7
BP	GO:0071482	cellular response to light stimulus	7/117	129/18866	1.58e-05	0.000103618	4.79e-05	PTGS2/CDKN1A/CASP9/TP53/MDM2/MYC/PARP1	7
BP	GO:0046697	decidualization	4/117	25/18866	1.61e-05	0.000105024	4.85e-05	PTGS2/MAPK1/GJA1/SPP1	4
BP	GO:1904385	cellular response to angiotensin	4/117	25/18866	1.61e-05	0.000105024	4.85e-05	RELA/CA2/CAV1/NFE2L2	4
BP	GO:2001026	regulation of endothelial cell chemotaxis	4/117	25/18866	1.61e-05	0.000105024	4.85e-05	KDR/VEGFA/MET/HSPB1	4
BP	GO:0051052	regulation of DNA metabolic process	11/117	365/18866	1.7e-05	0.000110949	5.13e-05	PPARG/CDK2/AKT1/EGFR/CDKN1A/MAPK1/TP53/IL4/MYC/GJA1/PARP1	11
BP	GO:0046777	protein autophosphorylation	9/117	237/18866	1.7e-05	0.000110949	5.13e-05	KDR/GSK3B/AKT1/JUN/EGFR/VEGFA/ERBB2/VEGFC/CAV1	9
BP	GO:0048260	positive regulation of receptor-mediated endocytosis	5/117	52/18866	1.73e-05	0.000112515	5.2e-05	SELE/VEGFA/IL4/EGF/SERPINE1	5
BP	GO:0071622	regulation of granulocyte chemotaxis	5/117	52/18866	1.73e-05	0.000112515	5.2e-05	DPP4/MAPK14/MAPK1/IL4/CXCL8	5
BP	GO:0010508	positive regulation of autophagy	7/117	131/18866	1.74e-05	0.000112951	5.22e-05	KDR/GSK3B/HMOX1/ADRB2/IFNG/IL4/HIF1A	7
BP	GO:0070098	chemokine-mediated signaling pathway	6/117	88/18866	1.79e-05	0.000115482	5.34e-05	HIF1A/CCL2/CXCL8/CXCL11/CXCL2/CXCL10	6
BP	GO:0090559	regulation of membrane permeability	6/117	88/18866	1.79e-05	0.000115482	5.34e-05	GSK3B/BCL2/MAPK8/BCL2L1/TP53/CASP8	6
BP	GO:0071346	cellular response to interferon-gamma	8/117	182/18866	1.79e-05	0.000115482	5.34e-05	NOS2/PPARG/STAT1/ICAM1/VCAM1/TP53/IFNG/CCL2	8
BP	GO:0035902	response to immobilization stress	4/117	26/18866	1.89e-05	0.00012101	5.59e-05	PPARG/CYP1A1/MDM2/FOS	4
BP	GO:0042730	fibrinolysis	4/117	26/18866	1.89e-05	0.00012101	5.59e-05	PLAU/PLAT/THBD/SERPINE1	4
BP	GO:1900739	regulation of protein insertion into mitochondrial membrane involved in apoptotic signaling pathway	4/117	26/18866	1.89e-05	0.00012101	5.59e-05	BCL2/MAPK8/TP53/CASP8	4
BP	GO:1900740	positive regulation of protein insertion into mitochondrial membrane involved in apoptotic signaling pathway	4/117	26/18866	1.89e-05	0.00012101	5.59e-05	BCL2/MAPK8/TP53/CASP8	4
BP	GO:0061756	leukocyte adhesion to vascular endothelial cell	5/117	53/18866	1.9e-05	0.000121737	5.63e-05	RELA/ICAM1/SELE/VCAM1/ALOX5	5
BP	GO:0001892	embryonic placenta development	6/117	89/18866	1.91e-05	0.000121927	5.64e-05	AKT1/EGFR/MAPK1/HIF1A/CASP8/IGF2	6
BP	GO:0042770	signal transduction in response to DNA damage	7/117	133/18866	1.92e-05	0.000122522	5.66e-05	MAPK14/CDK2/CDK1/CDKN1A/CASP9/TP53/MDM2	7
BP	GO:1903522	regulation of blood circulation	10/117	303/18866	1.93e-05	0.000122733	5.67e-05	PTGS2/SCN5A/AKT1/ICAM1/KCNH2/EGFR/MDM2/CAV1/GJA1/NOS3	10
BP	GO:0042058	regulation of epidermal growth factor receptor signaling pathway	6/117	90/18866	2.04e-05	0.000129324	5.98e-05	NCF1/AKT1/EGFR/MMP9/APP/EGF	6
BP	GO:0001933	negative regulation of protein phosphorylation	12/117	444/18866	2.05e-05	0.000129777	6e-05	AKT1/JUN/CASP3/GSTP1/CDKN1A/RB1/IFNG/CAV1/MYC/IL1B/HSPB1/IGFBP3	12
BP	GO:0060333	interferon-gamma-mediated signaling pathway	6/117	91/18866	2.17e-05	0.000137296	6.35e-05	PPARG/STAT1/ICAM1/VCAM1/TP53/IFNG	6
BP	GO:0010971	positive regulation of G2/M transition of mitotic cell cycle	4/117	27/18866	2.21e-05	0.000139017	6.43e-05	CDK1/CCND1/CDK4/APP	4
BP	GO:0033081	regulation of T cell differentiation in thymus	4/117	27/18866	2.21e-05	0.000139017	6.43e-05	ERBB2/SOD1/IL1B/IL1A	4
BP	GO:0048143	astrocyte activation	4/117	27/18866	2.21e-05	0.000139017	6.43e-05	EGFR/APP/IFNG/IL1B	4
BP	GO:0002931	response to ischemia	5/117	55/18866	2.29e-05	0.00014305	6.61e-05	BCL2/CASP9/TP53/CAV1/GJA1	5
BP	GO:0050819	negative regulation of coagulation	5/117	55/18866	2.29e-05	0.00014305	6.61e-05	PLAU/NOS3/PLAT/THBD/SERPINE1	5
BP	GO:0097345	mitochondrial outer membrane permeabilization	5/117	55/18866	2.29e-05	0.00014305	6.61e-05	GSK3B/BCL2/MAPK8/TP53/CASP8	5
BP	GO:0006469	negative regulation of protein kinase activity	9/117	246/18866	2.29e-05	0.00014305	6.61e-05	AKT1/CASP3/GSTP1/CDKN1A/RB1/IFNG/CAV1/IL1B/HSPB1	9
BP	GO:0048568	embryonic organ development	12/117	451/18866	2.39e-05	0.000149096	6.89e-05	KDR/AKT1/EGFR/VEGFA/MAPK1/TP53/HIF1A/CASP8/SOD1/CXCL8/RUNX2/IGF2	12
BP	GO:0030308	negative regulation of cell growth	8/117	190/18866	2.44e-05	0.000151974	7.03e-05	ESR2/PPARG/BCL2/CDKN1A/RB1/TP53/GJA1/SPP1	8
BP	GO:0055076	transition metal ion homeostasis	7/117	138/18866	2.44e-05	0.000151974	7.03e-05	HMOX1/APP/IFNG/XIAP/HIF1A/SOD1/MYC	7
BP	GO:0006977	DNA damage response, signal transduction by p53 class mediator resulting in cell cycle arrest	5/117	56/18866	2.5e-05	0.000154935	7.16e-05	CDK2/CDK1/CDKN1A/TP53/MDM2	5
BP	GO:0090183	regulation of kidney development	5/117	56/18866	2.5e-05	0.000154935	7.16e-05	STAT1/VEGFA/MMP9/IL6R/MYC	5
BP	GO:0002791	regulation of peptide secretion	11/117	381/18866	2.53e-05	0.000156423	7.23e-05	NOS2/DPP4/ALOX5/EGFR/IFNG/CD40LG/HIF1A/VEGFC/GJA1/IL1B/IL1A	11
BP	GO:0010575	positive regulation of vascular endothelial growth factor production	4/117	28/18866	2.56e-05	0.000158501	7.33e-05	PTGS2/HIF1A/IL1B/IL1A	4
BP	GO:0010660	regulation of muscle cell apoptotic process	6/117	94/18866	2.61e-05	0.000161142	7.45e-05	PPARG/HMOX1/TP53/IFNG/SOD2/NFE2L2	6
BP	GO:0046879	hormone secretion	10/117	314/18866	2.62e-05	0.000161339	7.46e-05	NOS2/DPP4/ALOX5/EGFR/IFNG/HIF1A/RAF1/GJA1/IL1B/SPP1	10
BP	GO:0001701	in utero embryonic development	11/117	383/18866	2.65e-05	0.000163043	7.54e-05	AR/AKT1/EGFR/VEGFA/BCL2L1/MAPK1/TP53/HIF1A/CASP8/NOS3/IGF2	11
BP	GO:0032025	response to cobalt ion	3/117	10/18866	2.7e-05	0.000165704	7.66e-05	CASP3/CASP9/CASP8	3
BP	GO:0033083	regulation of immature T cell proliferation	3/117	10/18866	2.7e-05	0.000165704	7.66e-05	ERBB2/IL1B/IL1A	3
BP	GO:0019748	secondary metabolic process	5/117	57/18866	2.72e-05	0.000165726	7.66e-05	AKR1B1/BCL2/CYP1A1/TYR/NFE2L2	5
BP	GO:0042743	hydrogen peroxide metabolic process	5/117	57/18866	2.72e-05	0.000165726	7.66e-05	CYP1A1/EGFR/MMP3/SOD1/MPO	5
BP	GO:0045840	positive regulation of mitotic nuclear division	5/117	57/18866	2.72e-05	0.000165726	7.66e-05	RB1/EGF/IL1B/IL1A/IGF2	5
BP	GO:0072431	signal transduction involved in mitotic G1 DNA damage checkpoint	5/117	57/18866	2.72e-05	0.000165726	7.66e-05	CDK2/CDK1/CDKN1A/TP53/MDM2	5
BP	GO:1902400	intracellular signal transduction involved in G1 DNA damage checkpoint	5/117	57/18866	2.72e-05	0.000165726	7.66e-05	CDK2/CDK1/CDKN1A/TP53/MDM2	5
BP	GO:0097194	execution phase of apoptosis	6/117	95/18866	2.77e-05	0.000168387	7.78e-05	AKT1/CASP3/BCL2L1/CASP9/TP53/CASP8	6
BP	GO:0001889	liver development	7/117	141/18866	2.81e-05	0.000170079	7.86e-05	RELA/JUN/HMOX1/CYP1A1/EGFR/CCND1/MET	7
BP	GO:0051896	regulation of protein kinase B signaling	9/117	253/18866	2.85e-05	0.000172629	7.98e-05	F7/ESR1/AKT1/EGFR/ERBB2/MET/EGF/F3/IGF2	9
BP	GO:0007263	nitric oxide mediated signal transduction	4/117	29/18866	2.96e-05	0.000178738	8.26e-05	NOS2/EGFR/VEGFA/NOS3	4
BP	GO:0019369	arachidonic acid metabolic process	5/117	58/18866	2.97e-05	0.000178738	8.26e-05	PTGS2/PTGS1/CYP1A1/ALOX5/PTGES	5
BP	GO:0031294	lymphocyte costimulation	5/117	58/18866	2.97e-05	0.000178738	8.26e-05	DPP4/AKT1/IL4/CD40LG/CAV1	5
BP	GO:0009306	protein secretion	12/117	462/18866	3.02e-05	0.000181804	8.4e-05	NOS2/DPP4/ALOX5/EGFR/IFNG/CD40LG/HIF1A/VEGFC/RAF1/GJA1/IL1B/IL1A	12
BP	GO:0050728	negative regulation of inflammatory response	8/117	196/18866	3.05e-05	0.000183191	8.47e-05	PPARG/TNFAIP6/ALOX5/GSTP1/RB1/IL2RA/IL4/SOD1	8
BP	GO:0008286	insulin receptor signaling pathway	7/117	143/18866	3.07e-05	0.000184129	8.51e-05	GSK3B/RELA/AKT1/CDK4/IL1B/PRKCB/IGF2	7
BP	GO:0035592	establishment of protein localization to extracellular region	12/117	463/18866	3.09e-05	0.000184792	8.54e-05	NOS2/DPP4/ALOX5/EGFR/IFNG/CD40LG/HIF1A/VEGFC/RAF1/GJA1/IL1B/IL1A	12
BP	GO:1990868	response to chemokine	6/117	97/18866	3.12e-05	0.000186241	8.61e-05	HIF1A/CCL2/CXCL8/CXCL11/CXCL2/CXCL10	6
BP	GO:1990869	cellular response to chemokine	6/117	97/18866	3.12e-05	0.000186241	8.61e-05	HIF1A/CCL2/CXCL8/CXCL11/CXCL2/CXCL10	6
BP	GO:0061008	hepaticobiliary system development	7/117	144/18866	3.21e-05	0.000190373	8.8e-05	RELA/JUN/HMOX1/CYP1A1/EGFR/CCND1/MET	7
BP	GO:0030072	peptide hormone secretion	9/117	257/18866	3.22e-05	0.000190373	8.8e-05	NOS2/DPP4/ALOX5/EGFR/IFNG/HIF1A/RAF1/GJA1/IL1B	9
BP	GO:0042306	regulation of protein import into nucleus	5/117	59/18866	3.23e-05	0.000190373	8.8e-05	PTGS2/MAPK14/CDK1/MAPK1/IFNG	5
BP	GO:0046456	icosanoid biosynthetic process	5/117	59/18866	3.23e-05	0.000190373	8.8e-05	PTGS2/PTGS1/ALOX5/PTGES/IL1B	5
BP	GO:0072413	signal transduction involved in mitotic cell cycle checkpoint	5/117	59/18866	3.23e-05	0.000190373	8.8e-05	CDK2/CDK1/CDKN1A/TP53/MDM2	5
BP	GO:1902402	signal transduction involved in mitotic DNA damage checkpoint	5/117	59/18866	3.23e-05	0.000190373	8.8e-05	CDK2/CDK1/CDKN1A/TP53/MDM2	5
BP	GO:1902403	signal transduction involved in mitotic DNA integrity checkpoint	5/117	59/18866	3.23e-05	0.000190373	8.8e-05	CDK2/CDK1/CDKN1A/TP53/MDM2	5
BP	GO:0043112	receptor metabolic process	8/117	198/18866	3.28e-05	0.000193261	8.93e-05	PPARG/SELE/VEGFA/IFNG/HIF1A/EGF/CAV1/CXCL8	8
BP	GO:0010657	muscle cell apoptotic process	6/117	98/18866	3.31e-05	0.00019462	9e-05	PPARG/HMOX1/TP53/IFNG/SOD2/NFE2L2	6
BP	GO:0051607	defense response to virus	9/117	258/18866	3.32e-05	0.00019524	9.03e-05	RELA/BCL2/STAT1/BCL2L1/IL2RA/IFNG/IL4/IL1B/CXCL10	9
BP	GO:0009914	hormone transport	10/117	323/18866	3.33e-05	0.00019524	9.03e-05	NOS2/DPP4/ALOX5/EGFR/IFNG/HIF1A/RAF1/GJA1/IL1B/SPP1	10
BP	GO:0001516	prostaglandin biosynthetic process	4/117	30/18866	3.4e-05	0.0001975	9.13e-05	PTGS2/PTGS1/PTGES/IL1B	4
BP	GO:0001844	protein insertion into mitochondrial membrane involved in apoptotic signaling pathway	4/117	30/18866	3.4e-05	0.0001975	9.13e-05	BCL2/MAPK8/TP53/CASP8	4
BP	GO:0046457	prostanoid biosynthetic process	4/117	30/18866	3.4e-05	0.0001975	9.13e-05	PTGS2/PTGS1/PTGES/IL1B	4
BP	GO:0048147	negative regulation of fibroblast proliferation	4/117	30/18866	3.4e-05	0.0001975	9.13e-05	PPARG/GSTP1/TP53/MYC	4
BP	GO:0060055	angiogenesis involved in wound healing	4/117	30/18866	3.4e-05	0.0001975	9.13e-05	KDR/ALOX5/VEGFA/SERPINE1	4
BP	GO:1902751	positive regulation of cell cycle G2/M phase transition	4/117	30/18866	3.4e-05	0.0001975	9.13e-05	CDK1/CCND1/CDK4/APP	4
BP	GO:1902808	positive regulation of cell cycle G1/S phase transition	5/117	60/18866	3.5e-05	0.000202848	9.38e-05	AKT1/CYP1A1/EGFR/CCND1/MDM2	5
BP	GO:1903428	positive regulation of reactive oxygen species biosynthetic process	5/117	60/18866	3.5e-05	0.000202848	9.38e-05	PTGS2/AKT1/ICAM1/IFNG/IL1B	5
BP	GO:0071692	protein localization to extracellular region	12/117	470/18866	3.57e-05	0.000206615	9.55e-05	NOS2/DPP4/ALOX5/EGFR/IFNG/CD40LG/HIF1A/VEGFC/RAF1/GJA1/IL1B/IL1A	12
BP	GO:0002221	pattern recognition receptor signaling pathway	8/117	201/18866	3.65e-05	0.000210823	9.75e-05	ESR1/RELA/IKBKB/NFKBIA/XIAP/CASP8/CAV1/CHUK	8
BP	GO:0044409	entry into host	7/117	147/18866	3.67e-05	0.000211356	9.77e-05	DPP4/CDK1/ICAM1/EGFR/MET/CAV1/CXCL8	7
BP	GO:0019371	cyclooxygenase pathway	3/117	11/18866	3.7e-05	0.000211594	9.78e-05	PTGS2/PTGS1/PTGES	3
BP	GO:0031652	positive regulation of heat generation	3/117	11/18866	3.7e-05	0.000211594	9.78e-05	PTGS2/IL1B/PTGER3	3
BP	GO:0033079	immature T cell proliferation	3/117	11/18866	3.7e-05	0.000211594	9.78e-05	ERBB2/IL1B/IL1A	3
BP	GO:0033197	response to vitamin E	3/117	11/18866	3.7e-05	0.000211594	9.78e-05	PPARG/CCND1/COL1A1	3
BP	GO:0043619	regulation of transcription from RNA polymerase II promoter in response to oxidative stress	3/117	11/18866	3.7e-05	0.000211594	9.78e-05	HMOX1/HIF1A/NFE2L2	3
BP	GO:0045807	positive regulation of endocytosis	6/117	100/18866	3.71e-05	0.000211594	9.78e-05	PPARG/SELE/VEGFA/IL4/EGF/SERPINE1	6
BP	GO:0070301	cellular response to hydrogen peroxide	6/117	100/18866	3.71e-05	0.000211594	9.78e-05	RELA/CDK1/MDM2/MET/NFE2L2/NQO1	6
BP	GO:0034341	response to interferon-gamma	8/117	202/18866	3.78e-05	0.000215425	9.96e-05	NOS2/PPARG/STAT1/ICAM1/VCAM1/TP53/IFNG/CCL2	8
BP	GO:1902110	positive regulation of mitochondrial membrane permeability involved in apoptotic process	5/117	61/18866	3.8e-05	0.000215892	9.98e-05	GSK3B/BCL2/MAPK8/TP53/CASP8	5
BP	GO:0032770	positive regulation of monooxygenase activity	4/117	31/18866	3.88e-05	0.000220579	0.000101963	AKT1/IFNG/HIF1A/IL1B	4
BP	GO:0044773	mitotic DNA damage checkpoint	6/117	101/18866	3.92e-05	0.000222483	0.000102844	CDK2/CDK1/CCND1/CDKN1A/TP53/MDM2	6
BP	GO:0002260	lymphocyte homeostasis	5/117	62/18866	4.11e-05	0.000232274	0.000107369	AKT1/BCL2/CASP3/IL2RA/HIF1A	5
BP	GO:1904589	regulation of protein import	5/117	62/18866	4.11e-05	0.000232274	0.000107369	PTGS2/MAPK14/CDK1/MAPK1/IFNG	5
BP	GO:0000079	regulation of cyclin-dependent protein serine/threonine kinase activity	6/117	102/18866	4.15e-05	0.000233797	0.000108074	AKT1/CASP3/EGFR/CCND1/CDKN1A/CDK4	6
BP	GO:2000060	positive regulation of ubiquitin-dependent protein catabolic process	6/117	102/18866	4.15e-05	0.000233797	0.000108074	GSK3B/AKT1/MDM2/EGF/CAV1/NFE2L2	6
BP	GO:0045580	regulation of T cell differentiation	7/117	150/18866	4.17e-05	0.000234739	0.000108509	ERBB2/IL2RA/IFNG/IL4/SOD1/IL1B/IL1A	7
BP	GO:0008202	steroid metabolic process	10/117	332/18866	4.2e-05	0.000235982	0.000109084	ESR1/AKR1B1/CYP1A1/APP/IFNG/IL4/SOD1/IL1B/SPP1/PON1	10
BP	GO:0046883	regulation of hormone secretion	9/117	267/18866	4.34e-05	0.000243628	0.000112618	NOS2/DPP4/ALOX5/EGFR/IFNG/HIF1A/GJA1/IL1B/SPP1	9
BP	GO:0000077	DNA damage checkpoint	7/117	151/18866	4.35e-05	0.000243809	0.000112702	MAPK14/CDK2/CDK1/CCND1/CDKN1A/TP53/MDM2	7
BP	GO:0070498	interleukin-1-mediated signaling pathway	6/117	103/18866	4.38e-05	0.000245182	0.000113336	RELA/IKBKB/NFKBIA/IL1B/IL1A/CHUK	6
BP	GO:0035767	endothelial cell chemotaxis	4/117	32/18866	4.42e-05	0.000246434	0.000113915	KDR/VEGFA/MET/HSPB1	4
BP	GO:0051385	response to mineralocorticoid	4/117	32/18866	4.42e-05	0.000246434	0.000113915	CCND1/CDKN1A/FOS/PARP1	4
BP	GO:1902686	mitochondrial outer membrane permeabilization involved in programmed cell death	5/117	63/18866	4.44e-05	0.000247348	0.000114337	GSK3B/BCL2/MAPK8/TP53/CASP8	5
BP	GO:0033673	negative regulation of kinase activity	9/117	268/18866	4.47e-05	0.000248579	0.000114907	AKT1/CASP3/GSTP1/CDKN1A/RB1/IFNG/CAV1/IL1B/HSPB1	9
BP	GO:0042326	negative regulation of phosphorylation	12/117	484/18866	4.74e-05	0.000263506	0.000121806	AKT1/JUN/CASP3/GSTP1/CDKN1A/RB1/IFNG/CAV1/MYC/IL1B/HSPB1/IGFBP3	12
BP	GO:0001885	endothelial cell development	5/117	64/18866	4.79e-05	0.000265421	0.000122692	IKBKB/ICAM1/VEGFA/MET/IL1B	5
BP	GO:1900449	regulation of glutamate receptor signaling pathway	5/117	64/18866	4.79e-05	0.000265421	0.000122692	GRIA2/ADRB2/APP/IFNG/CCL2	5
BP	GO:0002831	regulation of response to biotic stimulus	11/117	409/18866	4.82e-05	0.000266261	0.00012308	PPARG/RELA/IKBKB/STAT1/IL2RA/IFNG/IL4/XIAP/RAF1/IL1B/CHUK	11
BP	GO:0006983	ER overload response	3/117	12/18866	4.91e-05	0.000271076	0.000125306	GSK3B/TP53/HSPA5	3
BP	GO:1902003	regulation of amyloid-beta formation	4/117	33/18866	5e-05	0.000275822	0.0001275	RELA/CASP3/APP/IFNG	4
BP	GO:0032611	interleukin-1 beta production	6/117	106/18866	5.15e-05	0.000282803	0.000130727	GSTP1/APP/IFNG/CASP8/IL1B/HSPB1	6
BP	GO:1904029	regulation of cyclin-dependent protein kinase activity	6/117	106/18866	5.15e-05	0.000282803	0.000130727	AKT1/CASP3/EGFR/CCND1/CDKN1A/CDK4	6
BP	GO:0010573	vascular endothelial growth factor production	5/117	65/18866	5.17e-05	0.000282803	0.000130727	PTGS2/IL6R/HIF1A/IL1B/IL1A	5
BP	GO:0035794	positive regulation of mitochondrial membrane permeability	5/117	65/18866	5.17e-05	0.000282803	0.000130727	GSK3B/BCL2/MAPK8/TP53/CASP8	5
BP	GO:0051205	protein insertion into membrane	5/117	65/18866	5.17e-05	0.000282803	0.000130727	BCL2/MAPK8/EGFR/TP53/CASP8	5
BP	GO:0045927	positive regulation of growth	9/117	274/18866	5.3e-05	0.000289912	0.000134013	MAPK14/AKT1/BCL2/CDK1/EGFR/VEGFA/MAPK1/ERBB2/IGF2	9
BP	GO:0000187	activation of MAPK activity	7/117	156/18866	5.35e-05	0.000292125	0.000135036	MAPK14/CDK1/MAPK1/CD40LG/EGF/SOD1/IL1B	7
BP	GO:0007254	JNK cascade	8/117	213/18866	5.5e-05	0.000299031	0.000138228	NCF1/AKT1/MAPK8/GSTP1/EGFR/APP/CD40LG/IL1B	8
BP	GO:0030073	insulin secretion	8/117	213/18866	5.5e-05	0.000299031	0.000138228	NOS2/DPP4/ALOX5/IFNG/HIF1A/RAF1/GJA1/IL1B	8
BP	GO:0090276	regulation of peptide hormone secretion	8/117	213/18866	5.5e-05	0.000299031	0.000138228	NOS2/DPP4/ALOX5/EGFR/IFNG/HIF1A/GJA1/IL1B	8
BP	GO:0046626	regulation of insulin receptor signaling pathway	5/117	66/18866	5.56e-05	0.000300984	0.000139131	RELA/CDK4/IL1B/PRKCB/IGF2	5
BP	GO:1902108	regulation of mitochondrial membrane permeability involved in apoptotic process	5/117	66/18866	5.56e-05	0.000300984	0.000139131	GSK3B/BCL2/MAPK8/TP53/CASP8	5
BP	GO:2000378	negative regulation of reactive oxygen species metabolic process	5/117	66/18866	5.56e-05	0.000300984	0.000139131	BCL2/TP53/HIF1A/MMP3/CAV1	5
BP	GO:0042311	vasodilation	4/117	34/18866	5.64e-05	0.000303563	0.000140323	ADRB2/SOD2/SOD1/NOS3	4
BP	GO:0042759	long-chain fatty acid biosynthetic process	4/117	34/18866	5.64e-05	0.000303563	0.000140323	PTGS2/CYP1A1/ALOX5/GSTP1	4
BP	GO:0043276	anoikis	4/117	34/18866	5.64e-05	0.000303563	0.000140323	AKT1/BCL2/MCL1/CAV1	4
BP	GO:1902692	regulation of neuroblast proliferation	4/117	34/18866	5.64e-05	0.000303563	0.000140323	VEGFA/TP53/HIF1A/VEGFC	4
BP	GO:0044774	mitotic DNA integrity checkpoint	6/117	108/18866	5.72e-05	0.000306786	0.000141813	CDK2/CDK1/CCND1/CDKN1A/TP53/MDM2	6
BP	GO:0071887	leukocyte apoptotic process	6/117	108/18866	5.72e-05	0.000306786	0.000141813	AKT1/CASP3/CASP9/TP53/IL2RA/HIF1A	6
BP	GO:0050729	positive regulation of inflammatory response	7/117	158/18866	5.8e-05	0.000310847	0.00014369	PTGS2/EGFR/NFKBIA/IFNG/IL1B/PTGER3/SERPINE1	7
BP	GO:0007265	Ras protein signal transduction	10/117	346/18866	5.94e-05	0.000317535	0.000146782	MAPK14/CDK2/JUN/CDKN1A/RB1/TP53/MET/RAF1/COL3A1/CHUK	10
BP	GO:0072678	T cell migration	5/117	67/18866	5.98e-05	0.000319079	0.000147496	ICAM1/APP/CCL2/CXCL11/CXCL10	5
BP	GO:1905710	positive regulation of membrane permeability	5/117	67/18866	5.98e-05	0.000319079	0.000147496	GSK3B/BCL2/MAPK8/TP53/CASP8	5
BP	GO:2000278	regulation of DNA biosynthetic process	6/117	109/18866	6.02e-05	0.000320749	0.000148267	PPARG/CDKN1A/MAPK1/TP53/MYC/GJA1	6
BP	GO:0030947	regulation of vascular endothelial growth factor receptor signaling pathway	4/117	35/18866	6.34e-05	0.000335105	0.000154904	HIF1A/VEGFC/IL1B/PRKCB	4
BP	GO:0071312	cellular response to alkaloid	4/117	35/18866	6.34e-05	0.000335105	0.000154904	CASP3/ICAM1/BCL2L1/MDM2	4
BP	GO:1904031	positive regulation of cyclin-dependent protein kinase activity	4/117	35/18866	6.34e-05	0.000335105	0.000154904	AKT1/EGFR/CCND1/CDKN1A	4
BP	GO:0002674	negative regulation of acute inflammatory response	3/117	13/18866	6.35e-05	0.000335105	0.000154904	PPARG/GSTP1/IL4	3
BP	GO:0010623	programmed cell death involved in cell development	3/117	13/18866	6.35e-05	0.000335105	0.000154904	BCL2/IL1B/IL1A	3
BP	GO:0016264	gap junction assembly	3/117	13/18866	6.35e-05	0.000335105	0.000154904	CAV1/GJA1/IL1B	3
BP	GO:0031650	regulation of heat generation	3/117	13/18866	6.35e-05	0.000335105	0.000154904	PTGS2/IL1B/PTGER3	3
BP	GO:0016239	positive regulation of macroautophagy	5/117	68/18866	6.43e-05	0.00033793	0.000156209	KDR/HMOX1/ADRB2/IL4/HIF1A	5
BP	GO:0050766	positive regulation of phagocytosis	5/117	68/18866	6.43e-05	0.00033793	0.000156209	PPARG/IFNG/SOD1/IL1B/CCL2	5
BP	GO:0031570	DNA integrity checkpoint	7/117	161/18866	6.54e-05	0.00034281	0.000158465	MAPK14/CDK2/CDK1/CCND1/CDKN1A/TP53/MDM2	7
BP	GO:0034767	positive regulation of ion transmembrane transport	7/117	161/18866	6.54e-05	0.00034281	0.000158465	ADRB2/KCNH2/IFNG/ABCB1/CCL2/CXCL11/CXCL10	7
BP	GO:0016579	protein deubiquitination	9/117	283/18866	6.8e-05	0.000356304	0.000164703	AR/ESR1/CDK1/ADRB2/TP53/NFKBIA/MDM2/HIF1A/MYC	9
BP	GO:0071230	cellular response to amino acid stimulus	5/117	69/18866	6.89e-05	0.000360528	0.000166655	EGFR/BCL2L1/MMP2/COL1A1/COL3A1	5
BP	GO:0006816	calcium ion transport	11/117	426/18866	6.94e-05	0.000362443	0.000167541	PTGS2/BCL2/ICAM1/EGF/CAV1/GJA1/CCL2/PRKCB/NOS3/CXCL11/CXCL10	11
BP	GO:0006275	regulation of DNA replication	6/117	112/18866	7.01e-05	0.000365528	0.000168967	CDK2/JUN/CDK1/EGFR/TP53/EGF	6
BP	GO:0031214	biomineral tissue development	7/117	163/18866	7.07e-05	0.000367236	0.000169756	PTGS2/ALOX5/ADRB2/HIF1A/NOS3/COL1A1/SPP1	7
BP	GO:0110148	biomineralization	7/117	163/18866	7.07e-05	0.000367236	0.000169756	PTGS2/ALOX5/ADRB2/HIF1A/NOS3/COL1A1/SPP1	7
BP	GO:0033280	response to vitamin D	4/117	36/18866	7.1e-05	0.000367236	0.000169756	PTGS2/TYR/CXCL10/SPP1	4
BP	GO:0042554	superoxide anion generation	4/117	36/18866	7.1e-05	0.000367236	0.000169756	NCF1/GSTP1/EGFR/SOD1	4
BP	GO:0045742	positive regulation of epidermal growth factor receptor signaling pathway	4/117	36/18866	7.1e-05	0.000367236	0.000169756	NCF1/AKT1/MMP9/EGF	4
BP	GO:2000310	regulation of NMDA receptor activity	4/117	36/18866	7.1e-05	0.000367236	0.000169756	GRIA2/APP/IFNG/CCL2	4
BP	GO:0001676	long-chain fatty acid metabolic process	6/117	113/18866	7.36e-05	0.000380027	0.000175669	PTGS2/PTGS1/CYP1A1/ALOX5/GSTP1/PTGES	6
BP	GO:0140014	mitotic nuclear division	9/117	286/18866	7.38e-05	0.000380027	0.000175669	CDK1/RB1/BIRC5/XIAP/EGF/IL1B/PRKCB/IL1A/IGF2	9
BP	GO:0006879	cellular iron ion homeostasis	5/117	70/18866	7.39e-05	0.000380027	0.000175669	HMOX1/IFNG/HIF1A/SOD1/MYC	5
BP	GO:0032370	positive regulation of lipid transport	5/117	70/18866	7.39e-05	0.000380027	0.000175669	NFKBIA/CAV1/IL1B/SPP1/PON1	5
BP	GO:0032371	regulation of sterol transport	5/117	71/18866	7.91e-05	0.000404241	0.000186862	PPARG/NFKBIA/EGF/CAV1/PON1	5
BP	GO:0051785	positive regulation of nuclear division	5/117	71/18866	7.91e-05	0.000404241	0.000186862	RB1/EGF/IL1B/IL1A/IGF2	5
BP	GO:0070423	nucleotide-binding oligomerization domain containing signaling pathway	4/117	37/18866	7.92e-05	0.000404241	0.000186862	RELA/NFKBIA/XIAP/CASP8	4
BP	GO:0090050	positive regulation of cell migration involved in sprouting angiogenesis	4/117	37/18866	7.92e-05	0.000404241	0.000186862	PTGS2/KDR/HMOX1/VEGFA	4
BP	GO:0090322	regulation of superoxide metabolic process	4/117	37/18866	7.92e-05	0.000404241	0.000186862	GSTP1/EGFR/SOD1/NFE2L2	4
BP	GO:1904994	regulation of leukocyte adhesion to vascular endothelial cell	4/117	37/18866	7.92e-05	0.000404241	0.000186862	RELA/ICAM1/SELE/ALOX5	4
BP	GO:0050930	induction of positive chemotaxis	3/117	14/18866	8.05e-05	0.000408784	0.000188962	VEGFA/VEGFC/CXCL8	3
BP	GO:0071236	cellular response to antibiotic	3/117	14/18866	8.05e-05	0.000408784	0.000188962	TP53/MDM2/HSPA5	3
BP	GO:0090399	replicative senescence	3/117	14/18866	8.05e-05	0.000408784	0.000188962	CDKN1A/TP53/SERPINE1	3
BP	GO:0007178	transmembrane receptor protein serine/threonine kinase signaling pathway	10/117	359/18866	8.07e-05	0.000408784	0.000188962	MAPK14/JUN/TP53/XIAP/FOS/HSPA5/CAV1/PARP1/COL3A1/RUNX2	10
BP	GO:0010948	negative regulation of cell cycle process	10/117	359/18866	8.07e-05	0.000408784	0.000188962	CDK2/BCL2/CDK1/CCND1/CDKN1A/RB1/CDK4/TP53/MDM2/CCL2	10
BP	GO:0046620	regulation of organ growth	6/117	116/18866	8.52e-05	0.000430635	0.000199063	MAPK14/AKT1/CDK1/MAPK1/SOD1/GJA1	6
BP	GO:0046916	cellular transition metal ion homeostasis	6/117	116/18866	8.52e-05	0.000430635	0.000199063	HMOX1/APP/IFNG/HIF1A/SOD1/MYC	6
BP	GO:0010661	positive regulation of muscle cell apoptotic process	4/117	38/18866	8.81e-05	0.0004407	0.000203715	PPARG/TP53/IFNG/SOD2	4
BP	GO:0014912	negative regulation of smooth muscle cell migration	4/117	38/18866	8.81e-05	0.0004407	0.000203715	GSTP1/SERPINE1/NFE2L2/IGFBP3	4
BP	GO:0030224	monocyte differentiation	4/117	38/18866	8.81e-05	0.0004407	0.000203715	PPARG/JUN/VEGFA/MYC	4
BP	GO:0032885	regulation of polysaccharide biosynthetic process	4/117	38/18866	8.81e-05	0.0004407	0.000203715	GSK3B/AKT1/EGF/IGF2	4
BP	GO:0035872	nucleotide-binding domain, leucine rich repeat containing receptor signaling pathway	4/117	38/18866	8.81e-05	0.0004407	0.000203715	RELA/NFKBIA/XIAP/CASP8	4
BP	GO:0043029	T cell homeostasis	4/117	38/18866	8.81e-05	0.0004407	0.000203715	AKT1/BCL2/CASP3/IL2RA	4
BP	GO:1901186	positive regulation of ERBB signaling pathway	4/117	38/18866	8.81e-05	0.0004407	0.000203715	NCF1/AKT1/MMP9/EGF	4
BP	GO:1903131	mononuclear cell differentiation	4/117	38/18866	8.81e-05	0.0004407	0.000203715	PPARG/JUN/VEGFA/MYC	4
BP	GO:0038095	Fc-epsilon receptor signaling pathway	7/117	169/18866	8.87e-05	0.000442364	0.000204484	RELA/IKBKB/JUN/MAPK8/MAPK1/FOS/CHUK	7
BP	GO:0052126	movement in host environment	7/117	169/18866	8.87e-05	0.000442364	0.000204484	DPP4/CDK1/ICAM1/EGFR/MET/CAV1/CXCL8	7
BP	GO:0045446	endothelial cell differentiation	6/117	117/18866	8.93e-05	0.00044449	0.000205467	KDR/IKBKB/ICAM1/VEGFA/MET/IL1B	6
BP	GO:0072676	lymphocyte migration	6/117	117/18866	8.93e-05	0.00044449	0.000205467	AKT1/ICAM1/APP/CCL2/CXCL11/CXCL10	6
BP	GO:0072401	signal transduction involved in DNA integrity checkpoint	5/117	73/18866	9.03e-05	0.0004482	0.000207182	CDK2/CDK1/CDKN1A/TP53/MDM2	5
BP	GO:0072422	signal transduction involved in DNA damage checkpoint	5/117	73/18866	9.03e-05	0.0004482	0.000207182	CDK2/CDK1/CDKN1A/TP53/MDM2	5
BP	GO:0007160	cell-matrix adhesion	8/117	230/18866	9.42e-05	0.000466618	0.000215696	KDR/GSK3B/BCL2/VCAM1/PLAU/VEGFA/SERPINE1/COL3A1	8
BP	GO:0051302	regulation of cell division	7/117	171/18866	9.55e-05	0.000472439	0.000218387	VEGFA/BCL2L1/VEGFC/MYC/IL1B/IL1A/IGF2	7
BP	GO:0072395	signal transduction involved in cell cycle checkpoint	5/117	74/18866	9.64e-05	0.000476435	0.000220234	CDK2/CDK1/CDKN1A/TP53/MDM2	5
BP	GO:0001649	osteoblast differentiation	8/117	231/18866	9.7e-05	0.000479	0.000221419	AKT1/IL6R/VEGFC/COL1A1/SPP1/RUNX2/IGFBP3/IGF2	8
BP	GO:0014037	Schwann cell differentiation	4/117	39/18866	9.77e-05	0.000480441	0.000222086	RELA/AKT1/CDK1/SOD1	4
BP	GO:0034205	amyloid-beta formation	4/117	39/18866	9.77e-05	0.000480441	0.000222086	RELA/CASP3/APP/IFNG	4
BP	GO:2000279	negative regulation of DNA biosynthetic process	4/117	39/18866	9.77e-05	0.000480441	0.000222086	PPARG/CDKN1A/TP53/GJA1	4
BP	GO:0035635	entry of bacterium into host cell	3/117	15/18866	0.000100171	0.000490577	0.000226771	MET/CAV1/CXCL8	3
BP	GO:1901550	regulation of endothelial cell development	3/117	15/18866	0.000100171	0.000490577	0.000226771	IKBKB/VEGFA/IL1B	3
BP	GO:1903140	regulation of establishment of endothelial barrier	3/117	15/18866	0.000100171	0.000490577	0.000226771	IKBKB/VEGFA/IL1B	3
BP	GO:0006633	fatty acid biosynthetic process	7/117	173/18866	0.000102663	0.000502036	0.000232068	PTGS2/PTGS1/CYP1A1/ALOX5/GSTP1/PTGES/IL1B	7
BP	GO:1900076	regulation of cellular response to insulin stimulus	5/117	75/18866	0.000102777	0.000502036	0.000232068	RELA/CDK4/IL1B/PRKCB/IGF2	5
BP	GO:0070646	protein modification by small protein removal	9/117	300/18866	0.000106139	0.00051779	0.00023935	AR/ESR1/CDK1/ADRB2/TP53/NFKBIA/MDM2/HIF1A/MYC	9
BP	GO:0030218	erythrocyte differentiation	6/117	121/18866	0.00010761	0.000522932	0.000241727	MAPK14/CASP3/STAT1/VEGFA/RB1/HIF1A	6
BP	GO:0032612	interleukin-1 production	6/117	121/18866	0.00010761	0.000522932	0.000241727	GSTP1/APP/IFNG/CASP8/IL1B/HSPB1	6
BP	GO:0120254	olefinic compound metabolic process	6/117	121/18866	0.00010761	0.000522932	0.000241727	PTGS2/PTGS1/CYP1A1/ALOX5/GSTP1/PTGES	6
BP	GO:0016572	histone phosphorylation	4/117	40/18866	0.000108059	0.000523095	0.000241803	CDK2/CDK1/IL1B/PRKCB	4
BP	GO:0045746	negative regulation of Notch signaling pathway	4/117	40/18866	0.000108059	0.000523095	0.000241803	AKT1/EGFR/NFKBIA/EGF	4
BP	GO:1902991	regulation of amyloid precursor protein catabolic process	4/117	40/18866	0.000108059	0.000523095	0.000241803	RELA/CASP3/APP/IFNG	4
BP	GO:0045444	fat cell differentiation	8/117	235/18866	0.000109304	0.000528444	0.000244275	PTGS2/PPARG/MAPK14/AKT1/ALOX5/ADRB2/CCND1/RUNX1T1	8
BP	GO:0072091	regulation of stem cell proliferation	5/117	76/18866	0.000109474	0.000528589	0.000244342	VEGFA/TP53/HIF1A/VEGFC/GJA1	5
BP	GO:0007422	peripheral nervous system development	5/117	77/18866	0.000116502	0.0005618	0.000259694	RELA/AKT1/CDK1/ERBB2/SOD1	5
BP	GO:0007173	epidermal growth factor receptor signaling pathway	6/117	123/18866	0.000117791	0.00056657	0.000261899	NCF1/AKT1/EGFR/MMP9/APP/EGF	6
BP	GO:0071466	cellular response to xenobiotic stimulus	6/117	123/18866	0.000117791	0.00056657	0.000261899	PTGS1/CYP1A1/GSTP1/RB1/DPEP1/NQO1	6
BP	GO:0038083	peptidyl-tyrosine autophosphorylation	4/117	41/18866	0.000119171	0.000571747	0.000264292	KDR/EGFR/VEGFA/CAV1	4
BP	GO:0046825	regulation of protein export from nucleus	4/117	41/18866	0.000119171	0.000571747	0.000264292	GSK3B/TP53/MDM2/IL1B	4
BP	GO:0006959	humoral immune response	10/117	377/18866	0.000120594	0.000577842	0.00026711	BCL2/ALOX5/SLPI/IFNG/IL1B/CCL2/CXCL8/CXCL11/CXCL2/CXCL10	10
BP	GO:0050804	modulation of chemical synaptic transmission	11/117	454/18866	0.000121892	0.000583317	0.00026964	PTGS2/GSK3B/ADRB2/EGFR/MAPK1/APP/CA2/IL1B/CCL2/PRKCB/PLAT	11
BP	GO:0019372	lipoxygenase pathway	3/117	16/18866	0.00012273	0.000584362	0.000270124	PTGS2/ALOX5/PON1	3
BP	GO:0071391	cellular response to estrogen stimulus	3/117	16/18866	0.00012273	0.000584362	0.000270124	AR/ESR1/MDM2	3
BP	GO:0071732	cellular response to nitric oxide	3/117	16/18866	0.00012273	0.000584362	0.000270124	CDK2/DPEP1/MMP3	3
BP	GO:1900451	positive regulation of glutamate receptor signaling pathway	3/117	16/18866	0.00012273	0.000584362	0.000270124	ADRB2/IFNG/CCL2	3
BP	GO:0022612	gland morphogenesis	6/117	124/18866	0.000123161	0.000585515	0.000270656	AR/ESR1/PGR/BCL2/EGFR/CAV1	6
BP	GO:0070372	regulation of ERK1 and ERK2 cascade	9/117	306/18866	0.000123283	0.000585515	0.000270656	KDR/JUN/ICAM1/GSTP1/EGFR/APP/ERBB2/IL1B/CCL2	9
BP	GO:0099177	regulation of trans-synaptic signaling	11/117	455/18866	0.000124266	0.000589445	0.000272473	PTGS2/GSK3B/ADRB2/EGFR/MAPK1/APP/CA2/IL1B/CCL2/PRKCB/PLAT	11
BP	GO:0001952	regulation of cell-matrix adhesion	6/117	125/18866	0.000128723	0.000609819	0.000281891	KDR/GSK3B/BCL2/PLAU/VEGFA/SERPINE1	6
BP	GO:1900371	regulation of purine nucleotide biosynthetic process	4/117	42/18866	0.000131088	0.00062024	0.000286708	NOS2/IL4/NOS3/PARP1	4
BP	GO:0010827	regulation of glucose transmembrane transport	5/117	79/18866	0.00013159	0.000620282	0.000286727	MAPK14/AKT1/IL1B/PRKCB/NFE2L2	5
BP	GO:0031016	pancreas development	5/117	79/18866	0.00013159	0.000620282	0.000286727	GSK3B/AKT1/IL6R/MET/IGF2	5
BP	GO:0099601	regulation of neurotransmitter receptor activity	5/117	79/18866	0.00013159	0.000620282	0.000286727	GRIA2/ADRB2/APP/IFNG/CCL2	5
BP	GO:0016236	macroautophagy	9/117	310/18866	0.000135954	0.00063794	0.00029489	KDR/AKT1/CASP3/MAPK8/HMOX1/ADRB2/TP53/IL4/HIF1A	9
BP	GO:0090287	regulation of cellular response to growth factor stimulus	9/117	310/18866	0.000135954	0.00063794	0.00029489	TP53/XIAP/HIF1A/VEGFC/HSPA5/CAV1/IL1B/PRKCB/RUNX2	9
BP	GO:0045619	regulation of lymphocyte differentiation	7/117	181/18866	0.000136013	0.00063794	0.00029489	ERBB2/IL2RA/IFNG/IL4/SOD1/IL1B/IL1A	7
BP	GO:0050796	regulation of insulin secretion	7/117	181/18866	0.000136013	0.00063794	0.00029489	NOS2/DPP4/ALOX5/IFNG/HIF1A/GJA1/IL1B	7
BP	GO:0048678	response to axon injury	5/117	80/18866	0.000139673	0.000654295	0.00030245	BCL2/JUN/CDK1/SOD1/SPP1	5
BP	GO:1903052	positive regulation of proteolysis involved in cellular protein catabolic process	6/117	127/18866	0.000140445	0.000657096	0.000303745	GSK3B/AKT1/MDM2/EGF/CAV1/NFE2L2	6
BP	GO:0030808	regulation of nucleotide biosynthetic process	4/117	43/18866	0.000143844	0.000671331	0.000310325	NOS2/IL4/NOS3/PARP1	4
BP	GO:2000648	positive regulation of stem cell proliferation	4/117	43/18866	0.000143844	0.000671331	0.000310325	VEGFA/HIF1A/VEGFC/GJA1	4
BP	GO:1903532	positive regulation of secretion by cell	9/117	313/18866	0.000146157	0.000681284	0.000314926	EGFR/IFNG/IL4/HIF1A/VEGFC/GJA1/IL1B/IL1A/SPP1	9
BP	GO:0034763	negative regulation of transmembrane transport	6/117	128/18866	0.000146615	0.000681733	0.000315133	AKT1/KCNH2/MMP9/CAV1/IL1B/PRKCB	6
BP	GO:0072089	stem cell proliferation	6/117	128/18866	0.000146615	0.000681733	0.000315133	VEGFA/TP53/HIF1A/ABCB1/VEGFC/GJA1	6
BP	GO:0071158	positive regulation of cell cycle arrest	5/117	81/18866	0.000148131	0.000684763	0.000316534	CDK2/CDK1/CDKN1A/TP53/MDM2	5
BP	GO:0010224	response to UV-B	3/117	17/18866	0.000148356	0.000684763	0.000316534	RELA/BCL2/CDKN1A	3
BP	GO:0030949	positive regulation of vascular endothelial growth factor receptor signaling pathway	3/117	17/18866	0.000148356	0.000684763	0.000316534	HIF1A/IL1B/PRKCB	3
BP	GO:0045986	negative regulation of smooth muscle contraction	3/117	17/18866	0.000148356	0.000684763	0.000316534	PTGS2/ADRB2/SOD1	3
BP	GO:1903209	positive regulation of oxidative stress-induced cell death	3/117	17/18866	0.000148356	0.000684763	0.000316534	MCL1/MMP3/SOD1	3
BP	GO:2000811	negative regulation of anoikis	3/117	17/18866	0.000148356	0.000684763	0.000316534	BCL2/MCL1/CAV1	3
BP	GO:0038061	NIK/NF-kappaB signaling	7/117	184/18866	0.000150584	0.000693349	0.000320503	RELA/AKT1/EGFR/NFKBIA/APP/IL1B/CHUK	7
BP	GO:0046328	regulation of JNK cascade	7/117	184/18866	0.000150584	0.000693349	0.000320503	NCF1/AKT1/GSTP1/EGFR/APP/CD40LG/IL1B	7
BP	GO:2001257	regulation of cation channel activity	7/117	185/18866	0.000155713	0.000716091	0.000331015	GRIA2/ADRB2/MMP9/APP/IFNG/CAV1/CCL2	7
BP	GO:0022617	extracellular matrix disassembly	5/117	82/18866	0.000156976	0.000721018	0.000333293	DPP4/MMP1/MMP2/MMP9/MMP3	5
BP	GO:0031670	cellular response to nutrient	4/117	44/18866	0.000157475	0.000721552	0.00033354	PPARG/HMOX1/MDM2/COL1A1	4
BP	GO:0032881	regulation of polysaccharide metabolic process	4/117	44/18866	0.000157475	0.000721552	0.00033354	GSK3B/AKT1/EGF/IGF2	4
BP	GO:0009410	response to xenobiotic stimulus	6/117	130/18866	0.000159598	0.000730395	0.000337627	PTGS1/CYP1A1/GSTP1/RB1/DPEP1/NQO1	6
BP	GO:0051147	regulation of muscle cell differentiation	7/117	186/18866	0.000160983	0.000735839	0.000340144	MAPK14/BCL2/MDM2/IL4/SOD2/CXCL10/IGF2	7
BP	GO:0048708	astrocyte differentiation	5/117	83/18866	0.000166218	0.000757827	0.000350308	EGFR/MAPK1/APP/IFNG/IL1B	5
BP	GO:0071277	cellular response to calcium ion	5/117	83/18866	0.000166218	0.000757827	0.000350308	SCN5A/JUN/DPEP1/FOS/HSPA5	5
BP	GO:0048639	positive regulation of developmental growth	7/117	187/18866	0.000166396	0.000757827	0.000350308	MAPK14/AKT1/BCL2/CDK1/VEGFA/MAPK1/IGF2	7
BP	GO:0070838	divalent metal ion transport	11/117	471/18866	0.000167993	0.000764174	0.000353242	PTGS2/BCL2/ICAM1/EGF/CAV1/GJA1/CCL2/PRKCB/NOS3/CXCL11/CXCL10	11
BP	GO:0006869	lipid transport	10/117	393/18866	0.000169077	0.00076818	0.000355094	NOS2/PPARG/AKT1/NFKBIA/ABCB1/EGF/CAV1/IL1B/SPP1/PON1	10
BP	GO:0014002	astrocyte development	4/117	45/18866	0.000172015	0.000777781	0.000359532	EGFR/APP/IFNG/IL1B	4
BP	GO:0051204	protein insertion into mitochondrial membrane	4/117	45/18866	0.000172015	0.000777781	0.000359532	BCL2/MAPK8/TP53/CASP8	4
BP	GO:0060443	mammary gland morphogenesis	4/117	45/18866	0.000172015	0.000777781	0.000359532	AR/ESR1/PGR/CAV1	4
BP	GO:0090311	regulation of protein deacetylation	4/117	45/18866	0.000172015	0.000777781	0.000359532	MAPK8/VEGFA/TP53/IFNG	4
BP	GO:0071560	cellular response to transforming growth factor beta stimulus	8/117	252/18866	0.000176628	0.000797679	0.00036873	JUN/TP53/FOS/HSPA5/CAV1/COL1A1/PARP1/COL3A1	8
BP	GO:0010565	regulation of cellular ketone metabolic process	7/117	189/18866	0.000177666	0.000801409	0.000370454	PTGS2/PPARG/AKT1/ODC1/CAV1/IL1B/NQO1	7
BP	GO:0010874	regulation of cholesterol efflux	4/117	46/18866	0.000187501	0.000842747	0.000389563	NFKBIA/EGF/CAV1/PON1	4
BP	GO:0032570	response to progesterone	4/117	46/18866	0.000187501	0.000842747	0.000389563	RELA/FOS/CAV1/CLDN4	4
BP	GO:0061028	establishment of endothelial barrier	4/117	46/18866	0.000187501	0.000842747	0.000389563	IKBKB/ICAM1/VEGFA/IL1B	4
BP	GO:0043280	positive regulation of cysteine-type endopeptidase activity involved in apoptotic process	6/117	134/18866	0.000188289	0.000845282	0.000390734	PPARG/CASP9/CASP8/MYC/F3/CTSD	6
BP	GO:0051235	maintenance of location	9/117	324/18866	0.000189218	0.000848443	0.000392196	PPARG/AKT1/NFKBIA/HSPA5/CAV1/GJA1/IL1B/CXCL11/CXCL10	9
BP	GO:0072511	divalent inorganic cation transport	11/117	478/18866	0.000190889	0.00085492	0.00039519	PTGS2/BCL2/ICAM1/EGF/CAV1/GJA1/CCL2/PRKCB/NOS3/CXCL11/CXCL10	11
BP	GO:0001776	leukocyte homeostasis	5/117	86/18866	0.000196455	0.000878804	0.00040623	AKT1/BCL2/CASP3/IL2RA/HIF1A	5
BP	GO:0042113	B cell activation	9/117	328/18866	0.000207291	0.000922344	0.000426357	BCL2/CASP3/VCAM1/CDKN1A/TP53/IL4/CD40LG/CASP8/PRKCB	9
BP	GO:0071559	response to transforming growth factor beta	8/117	258/18866	0.000207309	0.000922344	0.000426357	JUN/TP53/FOS/HSPA5/CAV1/COL1A1/PARP1/COL3A1	8
BP	GO:0032436	positive regulation of proteasomal ubiquitin-dependent protein catabolic process	5/117	87/18866	0.000207411	0.000922344	0.000426357	GSK3B/AKT1/MDM2/CAV1/NFE2L2	5
BP	GO:0051781	positive regulation of cell division	5/117	87/18866	0.000207411	0.000922344	0.000426357	VEGFA/VEGFC/IL1B/IL1A/IGF2	5
BP	GO:0055072	iron ion homeostasis	5/117	87/18866	0.000207411	0.000922344	0.000426357	HMOX1/IFNG/HIF1A/SOD1/MYC	5
BP	GO:0032930	positive regulation of superoxide anion generation	3/117	19/18866	0.000209503	0.000926183	0.000428132	GSTP1/EGFR/SOD1	3
BP	GO:0034393	positive regulation of smooth muscle cell apoptotic process	3/117	19/18866	0.000209503	0.000926183	0.000428132	PPARG/IFNG/SOD2	3
BP	GO:0045780	positive regulation of bone resorption	3/117	19/18866	0.000209503	0.000926183	0.000428132	EGFR/CA2/SPP1	3
BP	GO:0046852	positive regulation of bone remodeling	3/117	19/18866	0.000209503	0.000926183	0.000428132	EGFR/CA2/SPP1	3
BP	GO:1902170	cellular response to reactive nitrogen species	3/117	19/18866	0.000209503	0.000926183	0.000428132	CDK2/DPEP1/MMP3	3
BP	GO:0007611	learning or memory	8/117	260/18866	0.000218461	0.000963526	0.000445393	PTGS2/JUN/CASP3/EGFR/MAPK1/APP/HIF1A/FOS	8
BP	GO:0042180	cellular ketone metabolic process	8/117	260/18866	0.000218461	0.000963526	0.000445393	PTGS2/PPARG/AKR1B1/AKT1/ODC1/CAV1/IL1B/NQO1	8
BP	GO:0032755	positive regulation of interleukin-6 production	5/117	88/18866	0.000218827	0.000964014	0.000445619	IL6R/APP/IFNG/IL1B/IL1A	5
BP	GO:0031952	regulation of protein autophosphorylation	4/117	48/18866	0.00022145	0.000972165	0.000449386	JUN/VEGFA/VEGFC/CAV1	4
BP	GO:0051972	regulation of telomerase activity	4/117	48/18866	0.00022145	0.000972165	0.000449386	PPARG/MAPK1/TP53/MYC	4
BP	GO:0060324	face development	4/117	48/18866	0.00022145	0.000972165	0.000449386	MMP2/MAPK1/RAF1/COL1A1	4
BP	GO:0002040	sprouting angiogenesis	7/117	196/18866	0.000222073	0.000973764	0.000450126	PTGS2/KDR/AKT1/HMOX1/ALOX5/VEGFA/VEGFC	7
BP	GO:0007517	muscle organ development	10/117	407/18866	0.000224096	0.000980716	0.000453339	MAPK14/BCL2/CDK1/MAPK1/RB1/FOS/CAV1/GJA1/COL3A1/CXCL10	10
BP	GO:0043312	neutrophil degranulation	11/117	487/18866	0.000224178	0.000980716	0.000453339	MAPK14/OLR1/TNFAIP6/ALOX5/GSTP1/SLPI/PLAU/MMP9/MAPK1/MPO/CTSD	11
BP	GO:0060537	muscle tissue development	10/117	409/18866	0.000233064	0.00101841	0.000470762	MAPK14/BCL2/CDK1/VEGFA/MAPK1/RB1/FOS/CAV1/GJA1/COL3A1	10
BP	GO:0002283	neutrophil activation involved in immune response	11/117	490/18866	0.000236315	0.00103142	0.000476776	MAPK14/OLR1/TNFAIP6/ALOX5/GSTP1/SLPI/PLAU/MMP9/MAPK1/MPO/CTSD	11
BP	GO:0002686	negative regulation of leukocyte migration	4/117	49/18866	0.000239987	0.00103783	0.000479743	DPP4/AKT1/HMOX1/CCL2	4
BP	GO:0003254	regulation of membrane depolarization	4/117	49/18866	0.000239987	0.00103783	0.000479743	SCN5A/KDR/BCL2/PARP1	4
BP	GO:0007595	lactation	4/117	49/18866	0.000239987	0.00103783	0.000479743	VEGFA/CCND1/HIF1A/CAV1	4
BP	GO:0031279	regulation of cyclase activity	4/117	49/18866	0.000239987	0.00103783	0.000479743	NOS2/MAPK14/MAPK8/NOS3	4
BP	GO:0042149	cellular response to glucose starvation	4/117	49/18866	0.000239987	0.00103783	0.000479743	BCL2/TP53/HSPA5/NFE2L2	4
BP	GO:0070231	T cell apoptotic process	4/117	49/18866	0.000239987	0.00103783	0.000479743	AKT1/TP53/IL2RA/HIF1A	4
BP	GO:0090151	establishment of protein localization to mitochondrial membrane	4/117	49/18866	0.000239987	0.00103783	0.000479743	BCL2/MAPK8/TP53/CASP8	4
BP	GO:0090199	regulation of release of cytochrome c from mitochondria	4/117	49/18866	0.000239987	0.00103783	0.000479743	AKT1/BCL2L1/MMP9/TP53	4
BP	GO:0070542	response to fatty acid	5/117	90/18866	0.000243088	0.00104786	0.000484375	PTGS2/PPARG/AKT1/CDK4/PON1	5
BP	GO:0002544	chronic inflammatory response	3/117	20/18866	0.000245361	0.00104786	0.000484375	IL4/PTGES/GJA1	3
BP	GO:0007252	I-kappaB phosphorylation	3/117	20/18866	0.000245361	0.00104786	0.000484375	IKBKB/AKT1/CHUK	3
BP	GO:0010042	response to manganese ion	3/117	20/18866	0.000245361	0.00104786	0.000484375	PTGS2/APP/HSPA5	3
BP	GO:0010875	positive regulation of cholesterol efflux	3/117	20/18866	0.000245361	0.00104786	0.000484375	NFKBIA/CAV1/PON1	3
BP	GO:0032495	response to muramyl dipeptide	3/117	20/18866	0.000245361	0.00104786	0.000484375	MAPK14/RELA/NFKBIA	3
BP	GO:0051412	response to corticosterone	3/117	20/18866	0.000245361	0.00104786	0.000484375	CCND1/CDKN1A/FOS	3
BP	GO:0060353	regulation of cell adhesion molecule production	3/117	20/18866	0.000245361	0.00104786	0.000484375	CAV1/IL1B/CXCL8	3
BP	GO:0060965	negative regulation of gene silencing by miRNA	3/117	20/18866	0.000245361	0.00104786	0.000484375	ESR1/PPARG/TP53	3
BP	GO:0071731	response to nitric oxide	3/117	20/18866	0.000245361	0.00104786	0.000484375	CDK2/DPEP1/MMP3	3
BP	GO:1900409	positive regulation of cellular response to oxidative stress	3/117	20/18866	0.000245361	0.00104786	0.000484375	MCL1/MMP3/SOD1	3
BP	GO:0008584	male gonad development	6/117	141/18866	0.000248171	0.00105866	0.000489368	AR/ESR1/BCL2/ICAM1/CCND1/BCL2L1	6
BP	GO:0032412	regulation of ion transmembrane transporter activity	8/117	265/18866	0.000248509	0.0010589	0.00048948	GRIA2/ADRB2/MMP9/APP/IFNG/ABCB1/CAV1/CCL2	8
BP	GO:0051054	positive regulation of DNA metabolic process	7/117	200/18866	0.000251217	0.00106803	0.0004937	CDK2/AKT1/EGFR/MAPK1/IL4/MYC/PARP1	7
BP	GO:1901888	regulation of cell junction assembly	7/117	200/18866	0.000251217	0.00106803	0.0004937	KDR/IKBKB/VEGFA/APP/CAV1/GJA1/IL1B	7
BP	GO:0046849	bone remodeling	5/117	91/18866	0.000255959	0.00108574	0.000501887	ADRB2/EGFR/CA2/GJA1/SPP1	5
BP	GO:2000177	regulation of neural precursor cell proliferation	5/117	91/18866	0.000255959	0.00108574	0.000501887	VEGFA/TP53/HIF1A/VEGFC/EGF	5
BP	GO:0007006	mitochondrial membrane organization	6/117	142/18866	0.000257825	0.00108997	0.000503844	GSK3B/BCL2/MAPK8/BCL2L1/TP53/CASP8	6
BP	GO:0046425	regulation of receptor signaling pathway via JAK-STAT	6/117	142/18866	0.000257825	0.00108997	0.000503844	AKR1B1/IL6R/IFNG/IL4/EGF/CAV1	6
BP	GO:0046546	development of primary male sexual characteristics	6/117	142/18866	0.000257825	0.00108997	0.000503844	AR/ESR1/BCL2/ICAM1/CCND1/BCL2L1	6
BP	GO:0001774	microglial cell activation	4/117	50/18866	0.000259615	0.00109386	0.000505642	JUN/APP/IFNG/IL4	4
BP	GO:0002269	leukocyte activation involved in inflammatory response	4/117	50/18866	0.000259615	0.00109386	0.000505642	JUN/APP/IFNG/IL4	4
BP	GO:0042987	amyloid precursor protein catabolic process	4/117	50/18866	0.000259615	0.00109386	0.000505642	RELA/CASP3/APP/IFNG	4
BP	GO:0072331	signal transduction by p53 class mediator	8/117	267/18866	0.000261439	0.00110032	0.000508627	MAPK14/CDK2/AKT1/BCL2/CDK1/CDKN1A/TP53/MDM2	8
BP	GO:0007179	transforming growth factor beta receptor signaling pathway	7/117	202/18866	0.000266903	0.00112206	0.000518678	JUN/TP53/FOS/HSPA5/CAV1/PARP1/COL3A1	7
BP	GO:0045598	regulation of fat cell differentiation	6/117	143/18866	0.000267771	0.00112446	0.000519786	PTGS2/PPARG/MAPK14/AKT1/ALOX5/RUNX1T1	6
BP	GO:0045582	positive regulation of T cell differentiation	5/117	92/18866	0.000269342	0.00112854	0.000521674	IL2RA/IFNG/IL4/IL1B/IL1A	5
BP	GO:1905897	regulation of response to endoplasmic reticulum stress	5/117	92/18866	0.000269342	0.00112854	0.000521674	ALOX5/BCL2L1/HSPA5/CAV1/NFE2L2	5
BP	GO:0051047	positive regulation of secretion	9/117	340/18866	0.000270346	0.00113149	0.000523037	EGFR/IFNG/IL4/HIF1A/VEGFC/GJA1/IL1B/IL1A/SPP1	9
BP	GO:0031348	negative regulation of defense response	8/117	269/18866	0.000274916	0.00114934	0.000531289	PPARG/TNFAIP6/ALOX5/GSTP1/RB1/IL2RA/IL4/SOD1	8
BP	GO:0019058	viral life cycle	9/117	341/18866	0.00027625	0.00115364	0.000533275	DPP4/BCL2/CDK1/ICAM1/SLPI/EGFR/CAV1/CCL2/CXCL8	9
BP	GO:0106106	cold-induced thermogenesis	6/117	144/18866	0.000278017	0.00115846	0.0005355	ADRB2/VEGFA/RB1/IL4/CAV1/GJA1	6
BP	GO:0120161	regulation of cold-induced thermogenesis	6/117	144/18866	0.000278017	0.00115846	0.0005355	ADRB2/VEGFA/RB1/IL4/CAV1/GJA1	6
BP	GO:0038084	vascular endothelial growth factor signaling pathway	4/117	51/18866	0.00028037	0.0011644	0.000538247	KDR/VEGFA/VEGFC/HSPB1	4
BP	GO:0050435	amyloid-beta metabolic process	4/117	51/18866	0.00028037	0.0011644	0.000538247	RELA/CASP3/APP/IFNG	4
BP	GO:0071354	cellular response to interleukin-6	4/117	51/18866	0.00028037	0.0011644	0.000538247	RELA/STAT1/ICAM1/IL6R	4
BP	GO:0045185	maintenance of protein location	5/117	93/18866	0.00028325	0.00117507	0.000543179	AKT1/NFKBIA/HSPA5/CAV1/GJA1	5
BP	GO:0071498	cellular response to fluid shear stress	3/117	21/18866	0.000284963	0.00117829	0.000544666	PTGS2/CA2/NFE2L2	3
BP	GO:0072111	cell proliferation involved in kidney development	3/117	21/18866	0.000284963	0.00117829	0.000544666	STAT1/IL6R/MYC	3
BP	GO:0090312	positive regulation of protein deacetylation	3/117	21/18866	0.000284963	0.00117829	0.000544666	VEGFA/TP53/IFNG	3
BP	GO:0010721	negative regulation of cell development	9/117	343/18866	0.000288379	0.0011911	0.000550591	GSK3B/BCL2/VEGFA/TP53/MDM2/APP/IL1B/COL3A1/SPP1	9
BP	GO:1905954	positive regulation of lipid localization	5/117	94/18866	0.000297696	0.00122824	0.000567759	NFKBIA/CAV1/IL1B/SPP1/PON1	5
BP	GO:0000186	activation of MAPKK activity	4/117	52/18866	0.000302289	0.00124447	0.000575259	EGFR/MAPK1/EGF/RAF1	4
BP	GO:0038066	p38MAPK cascade	4/117	52/18866	0.000302289	0.00124447	0.000575259	MAPK14/NCF1/VEGFA/IL1B	4
BP	GO:0044839	cell cycle G2/M phase transition	8/117	273/18866	0.000303579	0.00124841	0.000577084	CDK2/CDK1/CCND1/CDKN1A/CDK4/TP53/APP/ABCB1	8
BP	GO:0034284	response to monosaccharide	7/117	207/18866	0.000309589	0.00127036	0.000587228	PTGS2/CASP3/ICAM1/GSTP1/HIF1A/RAF1/GJA1	7
BP	GO:0050866	negative regulation of cell activation	7/117	207/18866	0.000309589	0.00127036	0.000587228	CASP3/HMOX1/ERBB2/IL2RA/IL4/NOS3/THBD	7
BP	GO:1904064	positive regulation of cation transmembrane transport	6/117	147/18866	0.000310614	0.00127318	0.000588531	ADRB2/KCNH2/IFNG/CCL2/CXCL11/CXCL10	6
BP	GO:0003073	regulation of systemic arterial blood pressure	5/117	95/18866	0.000312694	0.00128032	0.00059183	AR/ADRB2/SOD2/GJA1/NOS3	5
BP	GO:0032731	positive regulation of interleukin-1 beta production	4/117	53/18866	0.000325411	0.0013295	0.000614564	APP/IFNG/CASP8/HSPB1	4
BP	GO:0043124	negative regulation of I-kappaB kinase/NF-kappaB signaling	4/117	53/18866	0.000325411	0.0013295	0.000614564	ESR1/STAT1/GSTP1/CASP8	4
BP	GO:0032928	regulation of superoxide anion generation	3/117	22/18866	0.000328469	0.00133189	0.00061567	GSTP1/EGFR/SOD1	3
BP	GO:0042359	vitamin D metabolic process	3/117	22/18866	0.000328469	0.00133189	0.00061567	CYP1A1/IFNG/IL1B	3
BP	GO:0051900	regulation of mitochondrial depolarization	3/117	22/18866	0.000328469	0.00133189	0.00061567	KDR/BCL2/PARP1	3
BP	GO:0060352	cell adhesion molecule production	3/117	22/18866	0.000328469	0.00133189	0.00061567	CAV1/IL1B/CXCL8	3
BP	GO:0071157	negative regulation of cell cycle arrest	3/117	22/18866	0.000328469	0.00133189	0.00061567	CCND1/CDK4/MDM2	3
BP	GO:1901739	regulation of myoblast fusion	3/117	22/18866	0.000328469	0.00133189	0.00061567	MAPK14/IL4/CXCL10	3
BP	GO:1902884	positive regulation of response to oxidative stress	3/117	22/18866	0.000328469	0.00133189	0.00061567	MCL1/MMP3/SOD1	3
BP	GO:1903364	positive regulation of cellular protein catabolic process	6/117	149/18866	0.00033396	0.0013527	0.000625289	GSK3B/AKT1/MDM2/EGF/CAV1/NFE2L2	6
BP	GO:0030100	regulation of endocytosis	7/117	210/18866	0.000337725	0.00136648	0.000631662	PPARG/SELE/VEGFA/IL4/EGF/CAV1/SERPINE1	7
BP	GO:0032651	regulation of interleukin-1 beta production	5/117	97/18866	0.000344402	0.00138754	0.000641397	GSTP1/APP/IFNG/CASP8/HSPB1	5
BP	GO:0042100	B cell proliferation	5/117	97/18866	0.000344402	0.00138754	0.000641397	BCL2/CASP3/CDKN1A/IL4/CD40LG	5
BP	GO:0050764	regulation of phagocytosis	5/117	97/18866	0.000344402	0.00138754	0.000641397	PPARG/IFNG/SOD1/IL1B/CCL2	5
BP	GO:0120162	positive regulation of cold-induced thermogenesis	5/117	97/18866	0.000344402	0.00138754	0.000641397	ADRB2/VEGFA/IL4/CAV1/GJA1	5
BP	GO:0006749	glutathione metabolic process	4/117	54/18866	0.000349773	0.00140468	0.000649318	GSTP1/DPEP1/SOD1/NFE2L2	4
BP	GO:0032757	positive regulation of interleukin-8 production	4/117	54/18866	0.000349773	0.00140468	0.000649318	RELA/F3/IL1B/SERPINE1	4
BP	GO:2000179	positive regulation of neural precursor cell proliferation	4/117	54/18866	0.000349773	0.00140468	0.000649318	VEGFA/HIF1A/VEGFC/EGF	4
BP	GO:0019216	regulation of lipid metabolic process	10/117	431/18866	0.000353306	0.00141736	0.00065518	PTGS2/PPARG/AKT1/CYP1A1/RB1/CDK4/IFNG/SOD1/CAV1/IL1B	10
BP	GO:1904892	regulation of receptor signaling pathway via STAT	6/117	151/18866	0.000358659	0.00143578	0.000663694	AKR1B1/IL6R/IFNG/IL4/EGF/CAV1	6
BP	GO:2001056	positive regulation of cysteine-type endopeptidase activity	6/117	151/18866	0.000358659	0.00143578	0.000663694	PPARG/CASP9/CASP8/MYC/F3/CTSD	6
BP	GO:0030316	osteoclast differentiation	5/117	98/18866	0.00036114	0.00144418	0.000667576	MAPK14/IFNG/IL4/CA2/FOS	5
BP	GO:0002224	toll-like receptor signaling pathway	6/117	152/18866	0.000371534	0.00148417	0.000686061	ESR1/IKBKB/NFKBIA/CASP8/CAV1/CHUK	6
BP	GO:0034329	cell junction assembly	10/117	434/18866	0.000373136	0.00148641	0.000687096	KDR/GABRA1/IKBKB/BCL2/VEGFA/APP/CAV1/GJA1/IL1B/CLDN4	10
BP	GO:0051353	positive regulation of oxidoreductase activity	4/117	55/18866	0.000375413	0.00148641	0.000687096	AKT1/IFNG/HIF1A/IL1B	4
BP	GO:0070741	response to interleukin-6	4/117	55/18866	0.000375413	0.00148641	0.000687096	RELA/STAT1/ICAM1/IL6R	4
BP	GO:0002052	positive regulation of neuroblast proliferation	3/117	23/18866	0.000376036	0.00148641	0.000687096	VEGFA/HIF1A/VEGFC	3
BP	GO:0010288	response to lead ion	3/117	23/18866	0.000376036	0.00148641	0.000687096	PTGS2/CDK4/APP	3
BP	GO:0031639	plasminogen activation	3/117	23/18866	0.000376036	0.00148641	0.000687096	PLAU/PLAT/SERPINE1	3
BP	GO:0035162	embryonic hemopoiesis	3/117	23/18866	0.000376036	0.00148641	0.000687096	KDR/VEGFA/HIF1A	3
BP	GO:0060149	negative regulation of posttranscriptional gene silencing	3/117	23/18866	0.000376036	0.00148641	0.000687096	ESR1/PPARG/TP53	3
BP	GO:0060967	negative regulation of gene silencing by RNA	3/117	23/18866	0.000376036	0.00148641	0.000687096	ESR1/PPARG/TP53	3
BP	GO:1903798	regulation of production of miRNAs involved in gene silencing by miRNA	3/117	23/18866	0.000376036	0.00148641	0.000687096	ESR1/EGFR/TP53	3
BP	GO:0033044	regulation of chromosome organization	9/117	356/18866	0.000378458	0.00149441	0.000690798	MAPK8/VEGFA/MAPK1/RB1/TP53/MYC/IL1B/PARP1/IGF2	9
BP	GO:0014065	phosphatidylinositol 3-kinase signaling	6/117	154/18866	0.000398366	0.00157138	0.000726376	KDR/NCF1/AKT1/EGFR/MAPK1/ERBB2	6
BP	GO:0031589	cell-substrate adhesion	9/117	359/18866	0.000402245	0.0015822	0.00073138	KDR/GSK3B/BCL2/VCAM1/PLAU/VEGFA/SERPINE1/COL1A1/COL3A1	9
BP	GO:0031295	T cell costimulation	4/117	56/18866	0.000402369	0.0015822	0.00073138	DPP4/AKT1/CD40LG/CAV1	4
BP	GO:0086002	cardiac muscle cell action potential involved in contraction	4/117	56/18866	0.000402369	0.0015822	0.00073138	SCN5A/KCNH2/CAV1/GJA1	4
BP	GO:0010810	regulation of cell-substrate adhesion	7/117	217/18866	0.000411399	0.00161435	0.000746237	KDR/GSK3B/BCL2/PLAU/VEGFA/SERPINE1/COL1A1	7
BP	GO:1902749	regulation of cell cycle G2/M phase transition	7/117	217/18866	0.000411399	0.00161435	0.000746237	CDK2/CDK1/CCND1/CDKN1A/CDK4/TP53/APP	7
BP	GO:1990845	adaptive thermogenesis	6/117	155/18866	0.000412339	0.00161635	0.000747164	ADRB2/VEGFA/RB1/IL4/CAV1/GJA1	6
BP	GO:0007215	glutamate receptor signaling pathway	5/117	101/18866	0.000415059	0.00162196	0.000749755	GRIA2/ADRB2/APP/IFNG/CCL2	5
BP	GO:0019217	regulation of fatty acid metabolic process	5/117	101/18866	0.000415059	0.00162196	0.000749755	PTGS2/PPARG/AKT1/CAV1/IL1B	5
BP	GO:0032637	interleukin-8 production	5/117	101/18866	0.000415059	0.00162196	0.000749755	NOS2/RELA/F3/IL1B/SERPINE1	5
BP	GO:0010876	lipid localization	10/117	440/18866	0.000415592	0.00162236	0.00074994	NOS2/PPARG/AKT1/NFKBIA/ABCB1/EGF/CAV1/IL1B/SPP1/PON1	10
BP	GO:0006936	muscle contraction	9/117	362/18866	0.000427252	0.00165977	0.000767236	PTGS2/SCN5A/ADRB2/KCNH2/SOD1/CAV1/GJA1/PTGER3/CHUK	9
BP	GO:0010869	regulation of receptor biosynthetic process	3/117	24/18866	0.000427817	0.00165977	0.000767236	PPARG/IFNG/HIF1A	3
BP	GO:0045821	positive regulation of glycolytic process	3/117	24/18866	0.000427817	0.00165977	0.000767236	APP/IFNG/HIF1A	3
BP	GO:0051882	mitochondrial depolarization	3/117	24/18866	0.000427817	0.00165977	0.000767236	KDR/BCL2/PARP1	3
BP	GO:0060444	branching involved in mammary gland duct morphogenesis	3/117	24/18866	0.000427817	0.00165977	0.000767236	AR/ESR1/PGR	3
BP	GO:2000209	regulation of anoikis	3/117	24/18866	0.000427817	0.00165977	0.000767236	BCL2/MCL1/CAV1	3
BP	GO:0030520	intracellular estrogen receptor signaling pathway	4/117	57/18866	0.00043068	0.00166916	0.000771576	AR/ESR2/ESR1/PARP1	4
BP	GO:1903076	regulation of protein localization to plasma membrane	5/117	102/18866	0.000434316	0.00168152	0.000777291	AR/AKT1/EGFR/BCL2L1/IFNG	5
BP	GO:0002042	cell migration involved in sprouting angiogenesis	5/117	103/18866	0.000454239	0.00175506	0.000811281	PTGS2/KDR/AKT1/HMOX1/VEGFA	5
BP	GO:1901570	fatty acid derivative biosynthetic process	5/117	103/18866	0.000454239	0.00175506	0.000811281	PTGS2/PTGS1/ALOX5/PTGES/IL1B	5
BP	GO:0031638	zymogen activation	4/117	58/18866	0.000460385	0.00177516	0.000820576	PLAU/CASP8/PLAT/SERPINE1	4
BP	GO:1903749	positive regulation of establishment of protein localization to mitochondrion	4/117	58/18866	0.000460385	0.00177516	0.000820576	BCL2/MAPK8/TP53/CASP8	4
BP	GO:2000058	regulation of ubiquitin-dependent protein catabolic process	6/117	159/18866	0.000472101	0.00181848	0.000840599	GSK3B/AKT1/MDM2/EGF/CAV1/NFE2L2	6
BP	GO:0002053	positive regulation of mesenchymal cell proliferation	3/117	25/18866	0.000483965	0.00184907	0.000854738	STAT1/VEGFA/MYC	3
BP	GO:0002092	positive regulation of receptor internalization	3/117	25/18866	0.000483965	0.00184907	0.000854738	SELE/VEGFA/EGF	3
BP	GO:0060330	regulation of response to interferon-gamma	3/117	25/18866	0.000483965	0.00184907	0.000854738	PPARG/STAT1/IFNG	3
BP	GO:0060334	regulation of interferon-gamma-mediated signaling pathway	3/117	25/18866	0.000483965	0.00184907	0.000854738	PPARG/STAT1/IFNG	3
BP	GO:0060571	morphogenesis of an epithelial fold	3/117	25/18866	0.000483965	0.00184907	0.000854738	AR/EGFR/HIF1A	3
BP	GO:0070920	regulation of production of small RNA involved in gene silencing by RNA	3/117	25/18866	0.000483965	0.00184907	0.000854738	ESR1/EGFR/TP53	3
BP	GO:0071677	positive regulation of mononuclear cell migration	3/117	25/18866	0.000483965	0.00184907	0.000854738	IL4/SERPINE1/CXCL10	3
BP	GO:2000679	positive regulation of transcription regulatory region DNA binding	3/117	25/18866	0.000483965	0.00184907	0.000854738	RB1/IFNG/PARP1	3
BP	GO:0048008	platelet-derived growth factor receptor signaling pathway	4/117	59/18866	0.000491521	0.00187225	0.000865454	F7/VEGFA/F3/PLAT	4
BP	GO:0060043	regulation of cardiac muscle cell proliferation	4/117	59/18866	0.000491521	0.00187225	0.000865454	MAPK14/CDK1/MAPK1/GJA1	4
BP	GO:0071385	cellular response to glucocorticoid stimulus	4/117	59/18866	0.000491521	0.00187225	0.000865454	ICAM1/GSTP1/EGFR/CASP9	4
BP	GO:0045621	positive regulation of lymphocyte differentiation	5/117	105/18866	0.000496144	0.00188605	0.000871832	IL2RA/IFNG/IL4/IL1B/IL1A	5
BP	GO:0048259	regulation of receptor-mediated endocytosis	5/117	105/18866	0.000496144	0.00188605	0.000871832	SELE/VEGFA/IL4/EGF/SERPINE1	5
BP	GO:0032732	positive regulation of interleukin-1 production	4/117	60/18866	0.000524129	0.00199042	0.000920079	APP/IFNG/CASP8/HSPB1	4
BP	GO:0030330	DNA damage response, signal transduction by p53 class mediator	5/117	107/18866	0.000540895	0.00205203	0.000948556	CDK2/CDK1/CDKN1A/TP53/MDM2	5
BP	GO:0030810	positive regulation of nucleotide biosynthetic process	3/117	26/18866	0.000544625	0.00206203	0.00095318	NOS2/IL4/NOS3	3
BP	GO:1900373	positive regulation of purine nucleotide biosynthetic process	3/117	26/18866	0.000544625	0.00206203	0.00095318	NOS2/IL4/NOS3	3
BP	GO:0030111	regulation of Wnt signaling pathway	9/117	375/18866	0.000550913	0.00208375	0.000963218	ESR1/MAPK14/GSK3B/EGFR/APP/XIAP/EGF/CAV1/COL1A1	9
BP	GO:0046661	male sex differentiation	6/117	164/18866	0.00055607	0.00210114	0.00097126	AR/ESR1/BCL2/ICAM1/CCND1/BCL2L1	6
BP	GO:0010574	regulation of vascular endothelial growth factor production	4/117	61/18866	0.000558246	0.00210725	0.000974085	PTGS2/HIF1A/IL1B/IL1A	4
BP	GO:0008593	regulation of Notch signaling pathway	5/117	108/18866	0.000564375	0.00212826	0.000983796	AKT1/EGFR/NFKBIA/EGF/NOS3	5
BP	GO:0048762	mesenchymal cell differentiation	7/117	229/18866	0.000567192	0.00213675	0.000987718	GSK3B/BCL2/STAT1/MAPK1/HIF1A/IL1B/COL1A1	7
BP	GO:0007162	negative regulation of cell adhesion	8/117	301/18866	0.000580168	0.00218345	0.00100931	AKT1/CASP3/VEGFA/ERBB2/IL2RA/IL4/SERPINE1/COL1A1	8
BP	GO:0006939	smooth muscle contraction	5/117	109/18866	0.000588614	0.00221302	0.00102298	PTGS2/ADRB2/SOD1/CAV1/PTGER3	5
BP	GO:0050890	cognition	8/117	302/18866	0.000592918	0.00222187	0.00102707	PTGS2/JUN/CASP3/EGFR/MAPK1/APP/HIF1A/FOS	8
BP	GO:0007405	neuroblast proliferation	4/117	62/18866	0.000593912	0.00222187	0.00102707	VEGFA/TP53/HIF1A/VEGFC	4
BP	GO:0010803	regulation of tumor necrosis factor-mediated signaling pathway	4/117	62/18866	0.000593912	0.00222187	0.00102707	IKBKB/GSTP1/CASP8/CHUK	4
BP	GO:0030888	regulation of B cell proliferation	4/117	62/18866	0.000593912	0.00222187	0.00102707	BCL2/CASP3/CDKN1A/IL4	4
BP	GO:0071384	cellular response to corticosteroid stimulus	4/117	62/18866	0.000593912	0.00222187	0.00102707	ICAM1/GSTP1/EGFR/CASP9	4
BP	GO:0045672	positive regulation of osteoclast differentiation	3/117	27/18866	0.000609943	0.00227732	0.0010527	IFNG/CA2/FOS	3
BP	GO:1903203	regulation of oxidative stress-induced neuron death	3/117	27/18866	0.000609943	0.00227732	0.0010527	MCL1/HIF1A/PARP1	3
BP	GO:1901800	positive regulation of proteasomal protein catabolic process	5/117	110/18866	0.000613625	0.00228654	0.00105696	GSK3B/AKT1/MDM2/CAV1/NFE2L2	5
BP	GO:1904659	glucose transmembrane transport	5/117	110/18866	0.000613625	0.00228654	0.00105696	MAPK14/AKT1/IL1B/PRKCB/NFE2L2	5
BP	GO:0010830	regulation of myotube differentiation	4/117	63/18866	0.000631167	0.00234727	0.00108503	MAPK14/BCL2/IL4/CXCL10	4
BP	GO:0046622	positive regulation of organ growth	4/117	63/18866	0.000631167	0.00234727	0.00108503	MAPK14/AKT1/CDK1/MAPK1	4
BP	GO:0032652	regulation of interleukin-1 production	5/117	111/18866	0.000639425	0.0023733	0.00109707	GSTP1/APP/IFNG/CASP8/HSPB1	5
BP	GO:0051149	positive regulation of muscle cell differentiation	5/117	111/18866	0.000639425	0.0023733	0.00109707	MAPK14/BCL2/MDM2/IL4/SOD2	5
BP	GO:0045088	regulation of innate immune response	8/117	307/18866	0.000660115	0.00244768	0.00113145	PPARG/RELA/IKBKB/STAT1/IFNG/XIAP/RAF1/CHUK	8
BP	GO:0002066	columnar/cuboidal epithelial cell development	4/117	64/18866	0.000670049	0.00246995	0.00114174	GSK3B/CDKN1A/HIF1A/SOD1	4
BP	GO:0032507	maintenance of protein location in cell	4/117	64/18866	0.000670049	0.00246995	0.00114174	AKT1/HSPA5/CAV1/GJA1	4
BP	GO:0033344	cholesterol efflux	4/117	64/18866	0.000670049	0.00246995	0.00114174	NFKBIA/EGF/CAV1/PON1	4
BP	GO:0045453	bone resorption	4/117	64/18866	0.000670049	0.00246995	0.00114174	ADRB2/EGFR/CA2/SPP1	4
BP	GO:0051926	negative regulation of calcium ion transport	4/117	64/18866	0.000670049	0.00246995	0.00114174	PTGS2/BCL2/ICAM1/NOS3	4
BP	GO:2000401	regulation of lymphocyte migration	4/117	64/18866	0.000670049	0.00246995	0.00114174	AKT1/APP/CCL2/CXCL10	4
BP	GO:0032635	interleukin-6 production	6/117	170/18866	0.00067168	0.00247354	0.0011434	NOS2/IL6R/APP/IFNG/IL1B/IL1A	6
BP	GO:0032800	receptor biosynthetic process	3/117	28/18866	0.00068006	0.00249465	0.00115316	PPARG/IFNG/HIF1A	3
BP	GO:0033598	mammary gland epithelial cell proliferation	3/117	28/18866	0.00068006	0.00249465	0.00115316	ESR1/CCND1/MAPK1	3
BP	GO:0045932	negative regulation of muscle contraction	3/117	28/18866	0.00068006	0.00249465	0.00115316	PTGS2/ADRB2/SOD1	3
BP	GO:0071280	cellular response to copper ion	3/117	28/18866	0.00068006	0.00249465	0.00115316	CYP1A1/APP/NFE2L2	3
BP	GO:0006940	regulation of smooth muscle contraction	4/117	65/18866	0.000710599	0.00260162	0.00120261	PTGS2/ADRB2/SOD1/CAV1	4
BP	GO:1905953	negative regulation of lipid localization	4/117	65/18866	0.000710599	0.00260162	0.00120261	PPARG/AKT1/NFKBIA/EGF	4
BP	GO:0050714	positive regulation of protein secretion	6/117	172/18866	0.000714089	0.00261186	0.00120734	EGFR/IFNG/HIF1A/VEGFC/GJA1/IL1A	6
BP	GO:0014706	striated muscle tissue development	9/117	389/18866	0.000715523	0.00261457	0.0012086	MAPK14/BCL2/CDK1/VEGFA/MAPK1/RB1/FOS/CAV1/GJA1	9
BP	GO:0008645	hexose transmembrane transport	5/117	114/18866	0.000721718	0.00263211	0.0012167	MAPK14/AKT1/IL1B/PRKCB/NFE2L2	5
BP	GO:0032411	positive regulation of transporter activity	5/117	114/18866	0.000721718	0.00263211	0.0012167	ADRB2/IFNG/ABCB1/CCL2/PON1	5
BP	GO:0031623	receptor internalization	5/117	115/18866	0.000750833	0.00273564	0.00126456	SELE/VEGFA/EGF/CAV1/CXCL8	5
BP	GO:0001782	B cell homeostasis	3/117	29/18866	0.000755113	0.00274064	0.00126687	BCL2/CASP3/HIF1A	3
BP	GO:0031063	regulation of histone deacetylation	3/117	29/18866	0.000755113	0.00274064	0.00126687	MAPK8/VEGFA/TP53	3
BP	GO:0032373	positive regulation of sterol transport	3/117	29/18866	0.000755113	0.00274064	0.00126687	NFKBIA/CAV1/PON1	3
BP	GO:0032376	positive regulation of cholesterol transport	3/117	29/18866	0.000755113	0.00274064	0.00126687	NFKBIA/CAV1/PON1	3
BP	GO:0048285	organelle fission	10/117	476/18866	0.000763706	0.00276917	0.00128006	KDR/CDK1/RB1/BIRC5/XIAP/EGF/IL1B/PRKCB/IL1A/IGF2	10
BP	GO:0038093	Fc receptor signaling pathway	7/117	241/18866	0.000766709	0.00277739	0.00128386	RELA/IKBKB/JUN/MAPK8/MAPK1/FOS/CHUK	7
BP	GO:0015749	monosaccharide transmembrane transport	5/117	116/18866	0.000780816	0.00282307	0.00130497	MAPK14/AKT1/IL1B/PRKCB/NFE2L2	5
BP	GO:0030518	intracellular steroid hormone receptor signaling pathway	5/117	116/18866	0.000780816	0.00282307	0.00130497	AR/ESR2/ESR1/PGR/PARP1	5
BP	GO:0002548	monocyte chemotaxis	4/117	67/18866	0.000796857	0.00287005	0.00132669	IL6R/CCL2/SERPINE1/CXCL10	4
BP	GO:0045123	cellular extravasation	4/117	67/18866	0.000796857	0.00287005	0.00132669	ICAM1/SELE/VCAM1/CCL2	4
BP	GO:0045670	regulation of osteoclast differentiation	4/117	67/18866	0.000796857	0.00287005	0.00132669	IFNG/IL4/CA2/FOS	4
BP	GO:1903672	positive regulation of sprouting angiogenesis	4/117	67/18866	0.000796857	0.00287005	0.00132669	PTGS2/KDR/HMOX1/VEGFA	4
BP	GO:0005979	regulation of glycogen biosynthetic process	3/117	30/18866	0.000835237	0.00298831	0.00138136	GSK3B/AKT1/IGF2	3
BP	GO:0007176	regulation of epidermal growth factor-activated receptor activity	3/117	30/18866	0.000835237	0.00298831	0.00138136	NCF1/APP/EGF	3
BP	GO:0010800	positive regulation of peptidyl-threonine phosphorylation	3/117	30/18866	0.000835237	0.00298831	0.00138136	MAPK1/APP/EGF	3
BP	GO:0010962	regulation of glucan biosynthetic process	3/117	30/18866	0.000835237	0.00298831	0.00138136	GSK3B/AKT1/IGF2	3
BP	GO:0035666	TRIF-dependent toll-like receptor signaling pathway	3/117	30/18866	0.000835237	0.00298831	0.00138136	IKBKB/CASP8/CHUK	3
BP	GO:0036475	neuron death in response to oxidative stress	3/117	30/18866	0.000835237	0.00298831	0.00138136	MCL1/HIF1A/PARP1	3
BP	GO:0060142	regulation of syncytium formation by plasma membrane fusion	3/117	30/18866	0.000835237	0.00298831	0.00138136	MAPK14/IL4/CXCL10	3
BP	GO:0002753	cytoplasmic pattern recognition receptor signaling pathway	4/117	68/18866	0.000842644	0.00300347	0.00138836	RELA/NFKBIA/XIAP/CASP8	4
BP	GO:0032642	regulation of chemokine production	4/117	68/18866	0.000842644	0.00300347	0.00138836	GSTP1/IL6R/HIF1A/IL1B	4
BP	GO:0006805	xenobiotic metabolic process	5/117	118/18866	0.000843457	0.00300347	0.00138836	PTGS1/CYP1A1/GSTP1/DPEP1/NQO1	5
BP	GO:0015918	sterol transport	5/117	118/18866	0.000843457	0.00300347	0.00138836	PPARG/NFKBIA/EGF/CAV1/PON1	5
BP	GO:0034219	carbohydrate transmembrane transport	5/117	118/18866	0.000843457	0.00300347	0.00138836	MAPK14/AKT1/IL1B/PRKCB/NFE2L2	5
BP	GO:0072330	monocarboxylic acid biosynthetic process	7/117	246/18866	0.000864668	0.0030761	0.00142194	PTGS2/PTGS1/CYP1A1/ALOX5/GSTP1/PTGES/IL1B	7
BP	GO:1901222	regulation of NIK/NF-kappaB signaling	5/117	119/18866	0.000876146	0.00311399	0.00143945	RELA/EGFR/NFKBIA/APP/IL1B	5
BP	GO:0050769	positive regulation of neurogenesis	10/117	485/18866	0.000880808	0.00312762	0.00144575	PPARG/RELA/BCL2/VEGFA/IFNG/HIF1A/VEGFC/HSPA5/IL1B/NFE2L2	10
BP	GO:0060038	cardiac muscle cell proliferation	4/117	69/18866	0.000890257	0.00315819	0.00145989	MAPK14/CDK1/MAPK1/GJA1	4
BP	GO:1901796	regulation of signal transduction by p53 class mediator	6/117	180/18866	0.000904845	0.00320693	0.00148241	MAPK14/CDK2/AKT1/BCL2/TP53/MDM2	6
BP	GO:0002675	positive regulation of acute inflammatory response	3/117	31/18866	0.000920566	0.00324738	0.00150111	PTGS2/IL1B/PTGER3	3
BP	GO:0045737	positive regulation of cyclin-dependent protein serine/threonine kinase activity	3/117	31/18866	0.000920566	0.00324738	0.00150111	AKT1/EGFR/CCND1	3
BP	GO:0071549	cellular response to dexamethasone stimulus	3/117	31/18866	0.000920566	0.00324738	0.00150111	ICAM1/EGFR/CASP9	3
BP	GO:1900745	positive regulation of p38MAPK cascade	3/117	31/18866	0.000920566	0.00324738	0.00150111	NCF1/VEGFA/IL1B	3
BP	GO:1902253	regulation of intrinsic apoptotic signaling pathway by p53 class mediator	3/117	31/18866	0.000920566	0.00324738	0.00150111	BCL2/TP53/MDM2	3
BP	GO:0010950	positive regulation of endopeptidase activity	6/117	181/18866	0.000931205	0.00327878	0.00151563	PPARG/CASP9/CASP8/MYC/F3/CTSD	6
BP	GO:1905330	regulation of morphogenesis of an epithelium	6/117	181/18866	0.000931205	0.00327878	0.00151563	AR/ESR1/STAT1/VEGFA/GJA1/CXCL10	6
BP	GO:0008088	axo-dendritic transport	4/117	70/18866	0.000939735	0.00330265	0.00152666	APP/HIF1A/SOD1/HSPB1	4
BP	GO:0032374	regulation of cholesterol transport	4/117	70/18866	0.000939735	0.00330265	0.00152666	NFKBIA/EGF/CAV1/PON1	4
BP	GO:0002065	columnar/cuboidal epithelial cell differentiation	5/117	121/18866	0.000944346	0.00331268	0.0015313	GSK3B/CDKN1A/HIF1A/SOD1/SERPINE1	5
BP	GO:0010906	regulation of glucose metabolic process	5/117	121/18866	0.000944346	0.00331268	0.0015313	GSK3B/AKT1/TP53/IGFBP3/IGF2	5
BP	GO:0042752	regulation of circadian rhythm	5/117	122/18866	0.00097989	0.00343417	0.00158746	PPARG/GSK3B/MAPK8/CDK1/TP53	5
BP	GO:0006986	response to unfolded protein	6/117	183/18866	0.000985697	0.00345131	0.00159538	CCND1/HSPA5/CCL2/CXCL8/HSPB1/NFE2L2	6
BP	GO:0033627	cell adhesion mediated by integrin	4/117	71/18866	0.000991118	0.00346386	0.00160118	DPP4/ICAM1/PLAU/SERPINE1	4
BP	GO:0042982	amyloid precursor protein metabolic process	4/117	71/18866	0.000991118	0.00346386	0.00160118	RELA/CASP3/APP/IFNG	4
BP	GO:0038128	ERBB2 signaling pathway	3/117	32/18866	0.00101123	0.00351784	0.00162613	EGFR/ERBB2/EGF	3
BP	GO:0051968	positive regulation of synaptic transmission, glutamatergic	3/117	32/18866	0.00101123	0.00351784	0.00162613	PTGS2/EGFR/CCL2	3
BP	GO:0060603	mammary gland duct morphogenesis	3/117	32/18866	0.00101123	0.00351784	0.00162613	AR/ESR1/PGR	3
BP	GO:0071295	cellular response to vitamin	3/117	32/18866	0.00101123	0.00351784	0.00162613	PPARG/MDM2/COL1A1	3
BP	GO:0097421	liver regeneration	3/117	32/18866	0.00101123	0.00351784	0.00162613	HMOX1/EGFR/CCND1	3
BP	GO:0006898	receptor-mediated endocytosis	8/117	328/18866	0.00101277	0.00351997	0.00162712	SELE/ADRB2/VEGFA/IL4/EGF/CAV1/CXCL8/SERPINE1	8
BP	GO:1904375	regulation of protein localization to cell periphery	5/117	123/18866	0.00101642	0.00352939	0.00163147	AR/AKT1/EGFR/BCL2L1/IFNG	5
BP	GO:0000086	G2/M transition of mitotic cell cycle	7/117	254/18866	0.00104172	0.00360727	0.00166747	CDK2/CDK1/CCND1/CDKN1A/CDK4/APP/ABCB1	7
BP	GO:0019318	hexose metabolic process	7/117	254/18866	0.00104172	0.00360727	0.00166747	MAPK14/GSK3B/AKR1B1/AKT1/TP53/IGFBP3/IGF2	7
BP	GO:2000027	regulation of animal organ morphogenesis	7/117	254/18866	0.00104172	0.00360727	0.00166747	AR/ESR1/BCL2/STAT1/VEGFA/MYC/RUNX2	7
BP	GO:0045600	positive regulation of fat cell differentiation	4/117	72/18866	0.00104444	0.0036134	0.00167031	PTGS2/PPARG/MAPK14/AKT1	4
BP	GO:0090257	regulation of muscle system process	7/117	256/18866	0.00109015	0.00376584	0.00174077	PTGS2/SCN5A/ADRB2/SOD1/CAV1/NOS3/PARP1	7
BP	GO:0030968	endoplasmic reticulum unfolded protein response	5/117	125/18866	0.0010925	0.00376584	0.00174077	CCND1/HSPA5/CCL2/CXCL8/NFE2L2	5
BP	GO:0035270	endocrine system development	5/117	125/18866	0.0010925	0.00376584	0.00174077	GSK3B/AKT1/MAPK1/IL6R/RAF1	5
BP	GO:0043500	muscle adaptation	5/117	125/18866	0.0010925	0.00376584	0.00174077	SCN5A/HMOX1/IL1B/NOS3/PARP1	5
BP	GO:0070227	lymphocyte apoptotic process	4/117	73/18866	0.00109976	0.00378392	0.00174913	AKT1/TP53/IL2RA/HIF1A	4
BP	GO:1903747	regulation of establishment of protein localization to mitochondrion	4/117	73/18866	0.00109976	0.00378392	0.00174913	BCL2/MAPK8/TP53/CASP8	4
BP	GO:0010464	regulation of mesenchymal cell proliferation	3/117	33/18866	0.00110735	0.00379618	0.0017548	STAT1/VEGFA/MYC	3
BP	GO:0010955	negative regulation of protein processing	3/117	33/18866	0.00110735	0.00379618	0.0017548	MDM2/XIAP/SERPINE1	3
BP	GO:0046627	negative regulation of insulin receptor signaling pathway	3/117	33/18866	0.00110735	0.00379618	0.0017548	RELA/IL1B/PRKCB	3
BP	GO:1903318	negative regulation of protein maturation	3/117	33/18866	0.00110735	0.00379618	0.0017548	MDM2/XIAP/SERPINE1	3
BP	GO:0086003	cardiac muscle cell contraction	4/117	74/18866	0.00115709	0.00396312	0.00183196	SCN5A/KCNH2/CAV1/GJA1	4
BP	GO:0051053	negative regulation of DNA metabolic process	5/117	127/18866	0.00117273	0.00401304	0.00185504	PPARG/CDKN1A/TP53/GJA1/PARP1	5
BP	GO:0002756	MyD88-independent toll-like receptor signaling pathway	3/117	34/18866	0.00120905	0.00411491	0.00190213	IKBKB/CASP8/CHUK	3
BP	GO:0016242	negative regulation of macroautophagy	3/117	34/18866	0.00120905	0.00411491	0.00190213	AKT1/HMOX1/TP53	3
BP	GO:0033198	response to ATP	3/117	34/18866	0.00120905	0.00411491	0.00190213	PTGS2/SOD1/IL1B	3
BP	GO:0035633	maintenance of blood-brain barrier	3/117	34/18866	0.00120905	0.00411491	0.00190213	PTGS2/VEGFA/GJA1	3
BP	GO:0045648	positive regulation of erythrocyte differentiation	3/117	34/18866	0.00120905	0.00411491	0.00190213	MAPK14/STAT1/HIF1A	3
BP	GO:0046685	response to arsenic-containing substance	3/117	34/18866	0.00120905	0.00411491	0.00190213	HMOX1/CYP1A1/CDKN1A	3
BP	GO:0032602	chemokine production	4/117	75/18866	0.00121649	0.00412534	0.00190695	GSTP1/IL6R/HIF1A/IL1B	4
BP	GO:0061844	antimicrobial humoral immune response mediated by antimicrobial peptide	4/117	75/18866	0.00121649	0.00412534	0.00190695	CXCL8/CXCL11/CXCL2/CXCL10	4
BP	GO:0072088	nephron epithelium morphogenesis	4/117	75/18866	0.00121649	0.00412534	0.00190695	BCL2/STAT1/VEGFA/MYC	4
BP	GO:0086001	cardiac muscle cell action potential	4/117	75/18866	0.00121649	0.00412534	0.00190695	SCN5A/KCNH2/CAV1/GJA1	4
BP	GO:0022408	negative regulation of cell-cell adhesion	6/117	191/18866	0.0012286	0.00416268	0.00192421	AKT1/CASP3/VEGFA/ERBB2/IL2RA/IL4	6
BP	GO:0061448	connective tissue development	7/117	262/18866	0.00124614	0.00421831	0.00194993	MAPK14/RELA/CDK4/IL6R/HIF1A/COL1A1/RUNX2	7
BP	GO:0048015	phosphatidylinositol-mediated signaling	6/117	192/18866	0.00126192	0.0042679	0.00197285	KDR/NCF1/AKT1/EGFR/MAPK1/ERBB2	6
BP	GO:0002793	positive regulation of peptide secretion	6/117	193/18866	0.00129593	0.00437899	0.0020242	EGFR/IFNG/HIF1A/VEGFC/GJA1/IL1A	6
BP	GO:0032735	positive regulation of interleukin-12 production	3/117	35/18866	0.00131645	0.00443245	0.00204891	MAPK14/IFNG/CD40LG	3
BP	GO:0034390	smooth muscle cell apoptotic process	3/117	35/18866	0.00131645	0.00443245	0.00204891	PPARG/IFNG/SOD2	3
BP	GO:0034391	regulation of smooth muscle cell apoptotic process	3/117	35/18866	0.00131645	0.00443245	0.00204891	PPARG/IFNG/SOD2	3
BP	GO:1900077	negative regulation of cellular response to insulin stimulus	3/117	35/18866	0.00131645	0.00443245	0.00204891	RELA/IL1B/PRKCB	3
BP	GO:0090150	establishment of protein localization to membrane	8/117	342/18866	0.00132205	0.00444733	0.0020558	NCF1/BCL2/MAPK8/EGFR/TP53/ERBB2/CASP8/HSPA5	8
BP	GO:0031330	negative regulation of cellular catabolic process	7/117	265/18866	0.00133044	0.00447154	0.00206699	MAPK14/AKT1/BCL2/HMOX1/TP53/MCL1/MET	7
BP	GO:0061418	regulation of transcription from RNA polymerase II promoter in response to hypoxia	4/117	77/18866	0.00134163	0.00450115	0.00208068	VEGFA/TP53/HIF1A/NFE2L2	4
BP	GO:0072028	nephron morphogenesis	4/117	77/18866	0.00134163	0.00450115	0.00208068	BCL2/STAT1/VEGFA/MYC	4
BP	GO:0032434	regulation of proteasomal ubiquitin-dependent protein catabolic process	5/117	131/18866	0.00134618	0.00451239	0.00208587	GSK3B/AKT1/MDM2/CAV1/NFE2L2	5
BP	GO:0042476	odontogenesis	5/117	132/18866	0.00139235	0.00466301	0.00215549	SCN5A/CA2/SERPINE1/COL1A1/RUNX2	5
BP	GO:0000280	nuclear division	9/117	428/18866	0.00139574	0.00467021	0.00215882	CDK1/RB1/BIRC5/XIAP/EGF/IL1B/PRKCB/IL1A/IGF2	9
BP	GO:0048017	inositol lipid-mediated signaling	6/117	196/18866	0.00140217	0.00468341	0.00216492	KDR/NCF1/AKT1/EGFR/MAPK1/ERBB2	6
BP	GO:0071897	DNA biosynthetic process	6/117	196/18866	0.00140217	0.00468341	0.00216492	PPARG/CDKN1A/MAPK1/TP53/MYC/GJA1	6
BP	GO:0000271	polysaccharide biosynthetic process	4/117	78/18866	0.00140746	0.00468863	0.00216733	GSK3B/AKT1/EGF/IGF2	4
BP	GO:0050688	regulation of defense response to virus	4/117	78/18866	0.00140746	0.00468863	0.00216733	STAT1/IL2RA/IL4/IL1B	4
BP	GO:0072332	intrinsic apoptotic signaling pathway by p53 class mediator	4/117	78/18866	0.00140746	0.00468863	0.00216733	BCL2/CDKN1A/TP53/MDM2	4
BP	GO:0070873	regulation of glycogen metabolic process	3/117	36/18866	0.00142968	0.00475424	0.00219766	GSK3B/AKT1/IGF2	3
BP	GO:1905332	positive regulation of morphogenesis of an epithelium	3/117	36/18866	0.00142968	0.00475424	0.00219766	AR/VEGFA/GJA1	3
BP	GO:0046718	viral entry into host cell	5/117	134/18866	0.00148818	0.00494443	0.00228558	DPP4/CDK1/ICAM1/EGFR/CAV1	5
BP	GO:0055021	regulation of cardiac muscle tissue growth	4/117	80/18866	0.00154581	0.00512338	0.0023683	MAPK14/CDK1/MAPK1/GJA1	4
BP	GO:1901224	positive regulation of NIK/NF-kappaB signaling	4/117	80/18866	0.00154581	0.00512338	0.0023683	RELA/EGFR/APP/IL1B	4
BP	GO:0030212	hyaluronan metabolic process	3/117	37/18866	0.00154883	0.00512338	0.0023683	AKT1/EGF/IL1B	3
BP	GO:0060969	negative regulation of gene silencing	3/117	37/18866	0.00154883	0.00512338	0.0023683	ESR1/PPARG/TP53	3
BP	GO:0071542	dopaminergic neuron differentiation	3/117	37/18866	0.00154883	0.00512338	0.0023683	GSK3B/VEGFA/HIF1A	3
BP	GO:0009755	hormone-mediated signaling pathway	6/117	200/18866	0.00155402	0.00513152	0.00237207	AR/ESR2/ESR1/PPARG/PGR/PARP1	6
BP	GO:0010389	regulation of G2/M transition of mitotic cell cycle	6/117	200/18866	0.00155402	0.00513152	0.00237207	CDK2/CDK1/CCND1/CDKN1A/CDK4/APP	6
BP	GO:0019915	lipid storage	4/117	81/18866	0.00161842	0.0053395	0.0024682	PPARG/NFKBIA/CAV1/IL1B	4
BP	GO:0009746	response to hexose	6/117	202/18866	0.00163449	0.0053878	0.00249053	PTGS2/CASP3/ICAM1/HIF1A/RAF1/GJA1	6
BP	GO:0019730	antimicrobial humoral response	5/117	137/18866	0.00164092	0.00539487	0.0024938	SLPI/CXCL8/CXCL11/CXCL2/CXCL10	5
BP	GO:0030183	B cell differentiation	5/117	137/18866	0.00164092	0.00539487	0.0024938	BCL2/VCAM1/TP53/IL4/CD40LG	5
BP	GO:1903038	negative regulation of leukocyte cell-cell adhesion	5/117	137/18866	0.00164092	0.00539487	0.0024938	AKT1/CASP3/ERBB2/IL2RA/IL4	5
BP	GO:0010749	regulation of nitric oxide mediated signal transduction	2/117	10/18866	0.00166109	0.00540479	0.00249838	EGFR/VEGFA	2
BP	GO:0045348	positive regulation of MHC class II biosynthetic process	2/117	10/18866	0.00166109	0.00540479	0.00249838	IFNG/IL4	2
BP	GO:0051901	positive regulation of mitochondrial depolarization	2/117	10/18866	0.00166109	0.00540479	0.00249838	KDR/PARP1	2
BP	GO:0051918	negative regulation of fibrinolysis	2/117	10/18866	0.00166109	0.00540479	0.00249838	THBD/SERPINE1	2
BP	GO:0060346	bone trabecula formation	2/117	10/18866	0.00166109	0.00540479	0.00249838	MMP2/COL1A1	2
BP	GO:0070391	response to lipoteichoic acid	2/117	10/18866	0.00166109	0.00540479	0.00249838	MAPK14/RELA	2
BP	GO:0071223	cellular response to lipoteichoic acid	2/117	10/18866	0.00166109	0.00540479	0.00249838	MAPK14/RELA	2
BP	GO:0071394	cellular response to testosterone stimulus	2/117	10/18866	0.00166109	0.00540479	0.00249838	AR/SPP1	2
BP	GO:0072203	cell proliferation involved in metanephros development	2/117	10/18866	0.00166109	0.00540479	0.00249838	STAT1/MYC	2
BP	GO:0120252	hydrocarbon metabolic process	2/117	10/18866	0.00166109	0.00540479	0.00249838	AKR1B1/CYP1A1	2
BP	GO:2001225	regulation of chloride transport	2/117	10/18866	0.00166109	0.00540479	0.00249838	CA2/ABCB1	2
BP	GO:0010742	macrophage derived foam cell differentiation	3/117	38/18866	0.00167404	0.00540479	0.00249838	PPARG/STAT1/NFKBIA	3
BP	GO:0032094	response to food	3/117	38/18866	0.00167404	0.00540479	0.00249838	AKT1/CYP1A1/MPO	3
BP	GO:0045923	positive regulation of fatty acid metabolic process	3/117	38/18866	0.00167404	0.00540479	0.00249838	PTGS2/PPARG/IL1B	3
BP	GO:0048009	insulin-like growth factor receptor signaling pathway	3/117	38/18866	0.00167404	0.00540479	0.00249838	AR/AKT1/IGFBP3	3
BP	GO:0060045	positive regulation of cardiac muscle cell proliferation	3/117	38/18866	0.00167404	0.00540479	0.00249838	MAPK14/CDK1/MAPK1	3
BP	GO:0060306	regulation of membrane repolarization	3/117	38/18866	0.00167404	0.00540479	0.00249838	SCN5A/KCNH2/CAV1	3
BP	GO:0071392	cellular response to estradiol stimulus	3/117	38/18866	0.00167404	0.00540479	0.00249838	ESR2/ESR1/EGFR	3
BP	GO:0086005	ventricular cardiac muscle cell action potential	3/117	38/18866	0.00167404	0.00540479	0.00249838	SCN5A/KCNH2/CAV1	3
BP	GO:0090077	foam cell differentiation	3/117	38/18866	0.00167404	0.00540479	0.00249838	PPARG/STAT1/NFKBIA	3
BP	GO:2000144	positive regulation of DNA-templated transcription, initiation	3/117	38/18866	0.00167404	0.00540479	0.00249838	ESR1/JUN/TP53	3
BP	GO:0045165	cell fate commitment	7/117	278/18866	0.00174861	0.00563701	0.00260573	AR/PPARG/BCL2/CASP3/TP53/MCL1/RUNX2	7
BP	GO:0043401	steroid hormone mediated signaling pathway	5/117	139/18866	0.00174895	0.00563701	0.00260573	AR/ESR2/ESR1/PGR/PARP1	5
BP	GO:0035966	response to topologically incorrect protein	6/117	205/18866	0.00176109	0.00567128	0.00262157	CCND1/HSPA5/CCL2/CXCL8/HSPB1/NFE2L2	6
BP	GO:0014855	striated muscle cell proliferation	4/117	83/18866	0.00177069	0.00569732	0.00263361	MAPK14/CDK1/MAPK1/GJA1	4
BP	GO:0009308	amine metabolic process	5/117	140/18866	0.00180489	0.00576962	0.00266703	CYP1A1/VCAM1/MAOA/ODC1/NQO1	5
BP	GO:0060968	regulation of gene silencing	5/117	140/18866	0.00180489	0.00576962	0.00266703	ESR1/PPARG/CDK2/EGFR/TP53	5
BP	GO:0072655	establishment of protein localization to mitochondrion	5/117	140/18866	0.00180489	0.00576962	0.00266703	AKT1/BCL2/MAPK8/TP53/CASP8	5
BP	GO:0001662	behavioral fear response	3/117	39/18866	0.0018054	0.00576962	0.00266703	DPP4/BCL2/GJA1	3
BP	GO:0010831	positive regulation of myotube differentiation	3/117	39/18866	0.0018054	0.00576962	0.00266703	MAPK14/BCL2/IL4	3
BP	GO:0033146	regulation of intracellular estrogen receptor signaling pathway	3/117	39/18866	0.0018054	0.00576962	0.00266703	AR/ESR1/PARP1	3
BP	GO:0046326	positive regulation of glucose import	3/117	39/18866	0.0018054	0.00576962	0.00266703	MAPK14/AKT1/NFE2L2	3
BP	GO:0086091	regulation of heart rate by cardiac conduction	3/117	39/18866	0.0018054	0.00576962	0.00266703	SCN5A/KCNH2/CAV1	3
BP	GO:0046890	regulation of lipid biosynthetic process	6/117	207/18866	0.00184954	0.00590568	0.00272992	PTGS2/AKT1/CDK4/IFNG/SOD1/IL1B	6
BP	GO:0007292	female gamete generation	5/117	142/18866	0.00192067	0.00612762	0.00283251	PTGS2/PGR/BCL2/TNFAIP6/NOS3	5
BP	GO:0032092	positive regulation of protein binding	4/117	85/18866	0.00193263	0.00615015	0.00284293	GSK3B/MMP9/APP/CAV1	4
BP	GO:0045844	positive regulation of striated muscle tissue development	4/117	85/18866	0.00193263	0.00615015	0.00284293	MAPK14/BCL2/CDK1/MAPK1	4
BP	GO:0048636	positive regulation of muscle organ development	4/117	85/18866	0.00193263	0.00615015	0.00284293	MAPK14/BCL2/CDK1/MAPK1	4
BP	GO:0002209	behavioral defense response	3/117	40/18866	0.00194302	0.00616243	0.0028486	DPP4/BCL2/GJA1	3
BP	GO:0050691	regulation of defense response to virus by host	3/117	40/18866	0.00194302	0.00616243	0.0028486	STAT1/IL4/IL1B	3
BP	GO:0090184	positive regulation of kidney development	3/117	40/18866	0.00194302	0.00616243	0.0028486	VEGFA/IL6R/MYC	3
BP	GO:0140353	lipid export from cell	3/117	40/18866	0.00194302	0.00616243	0.0028486	NOS2/IL1B/SPP1	3
BP	GO:0072006	nephron development	5/117	143/18866	0.00198056	0.0062762	0.0029012	BCL2/STAT1/VEGFA/IL6R/MYC	5
BP	GO:0045216	cell-cell junction organization	6/117	210/18866	0.00198848	0.00629603	0.00291036	IKBKB/VEGFA/CAV1/GJA1/IL1B/CLDN4	6
BP	GO:0006112	energy reserve metabolic process	4/117	86/18866	0.00201732	0.00630685	0.00291536	GSK3B/AKT1/MYC/IGF2	4
BP	GO:0006919	activation of cysteine-type endopeptidase activity involved in apoptotic process	4/117	86/18866	0.00201732	0.00630685	0.00291536	PPARG/CASP9/CASP8/F3	4
BP	GO:0034637	cellular carbohydrate biosynthetic process	4/117	86/18866	0.00201732	0.00630685	0.00291536	GSK3B/AKR1B1/AKT1/IGF2	4
BP	GO:0042509	regulation of tyrosine phosphorylation of STAT protein	4/117	86/18866	0.00201732	0.00630685	0.00291536	IL6R/IFNG/IL4/CAV1	4
BP	GO:0045445	myoblast differentiation	4/117	86/18866	0.00201732	0.00630685	0.00291536	MAPK14/RB1/CXCL10/IGFBP3	4
BP	GO:0070664	negative regulation of leukocyte proliferation	4/117	86/18866	0.00201732	0.00630685	0.00291536	CASP3/GSTP1/ERBB2/IL2RA	4
BP	GO:1901863	positive regulation of muscle tissue development	4/117	86/18866	0.00201732	0.00630685	0.00291536	MAPK14/BCL2/CDK1/MAPK1	4
BP	GO:0006527	arginine catabolic process	2/117	11/18866	0.002022	0.00630685	0.00291536	NOS2/NOS3	2
BP	GO:0006857	oligopeptide transport	2/117	11/18866	0.002022	0.00630685	0.00291536	CA2/GJA1	2
BP	GO:0031284	positive regulation of guanylate cyclase activity	2/117	11/18866	0.002022	0.00630685	0.00291536	NOS2/NOS3	2
BP	GO:0033148	positive regulation of intracellular estrogen receptor signaling pathway	2/117	11/18866	0.002022	0.00630685	0.00291536	AR/PARP1	2
BP	GO:0033327	Leydig cell differentiation	2/117	11/18866	0.002022	0.00630685	0.00291536	AR/CCND1	2
BP	GO:0045899	positive regulation of RNA polymerase II transcription preinitiation complex assembly	2/117	11/18866	0.002022	0.00630685	0.00291536	ESR1/TP53	2
BP	GO:0051712	positive regulation of killing of cells of other organism	2/117	11/18866	0.002022	0.00630685	0.00291536	NOS2/IFNG	2
BP	GO:0051974	negative regulation of telomerase activity	2/117	11/18866	0.002022	0.00630685	0.00291536	PPARG/TP53	2
BP	GO:0070673	response to interleukin-18	2/117	11/18866	0.002022	0.00630685	0.00291536	AKT1/ALOX5	2
BP	GO:1903800	positive regulation of production of miRNAs involved in gene silencing by miRNA	2/117	11/18866	0.002022	0.00630685	0.00291536	EGFR/TP53	2
BP	GO:1990440	positive regulation of transcription from RNA polymerase II promoter in response to endoplasmic reticulum stress	2/117	11/18866	0.002022	0.00630685	0.00291536	TP53/HSPA5	2
BP	GO:0060078	regulation of postsynaptic membrane potential	5/117	144/18866	0.0020418	0.00635807	0.00293904	GSK3B/GABRA1/AKT1/ADRB2/APP	5
BP	GO:0070585	protein localization to mitochondrion	5/117	144/18866	0.0020418	0.00635807	0.00293904	AKT1/BCL2/MAPK8/TP53/CASP8	5
BP	GO:0046394	carboxylic acid biosynthetic process	8/117	367/18866	0.00205815	0.00640369	0.00296013	PTGS2/PTGS1/CYP1A1/ALOX5/GSTP1/PTGES/EGF/IL1B	8
BP	GO:0002251	organ or tissue specific immune response	3/117	41/18866	0.00208701	0.0064615	0.00298685	NOS2/IL6R/IL4	3
BP	GO:0030890	positive regulation of B cell proliferation	3/117	41/18866	0.00208701	0.0064615	0.00298685	BCL2/CDKN1A/IL4	3
BP	GO:0033574	response to testosterone	3/117	41/18866	0.00208701	0.0064615	0.00298685	AR/CDK4/SPP1	3
BP	GO:0042596	fear response	3/117	41/18866	0.00208701	0.0064615	0.00298685	DPP4/BCL2/GJA1	3
BP	GO:0043267	negative regulation of potassium ion transport	3/117	41/18866	0.00208701	0.0064615	0.00298685	KCNH2/CAV1/NOS3	3
BP	GO:0071548	response to dexamethasone	3/117	41/18866	0.00208701	0.0064615	0.00298685	ICAM1/EGFR/CASP9	3
BP	GO:0016053	organic acid biosynthetic process	8/117	368/18866	0.00209319	0.00647081	0.00299116	PTGS2/PTGS1/CYP1A1/ALOX5/GSTP1/PTGES/EGF/IL1B	8
BP	GO:0060047	heart contraction	7/117	287/18866	0.00209345	0.00647081	0.00299116	SCN5A/KCNH2/MDM2/SOD1/CAV1/GJA1/NOS3	7
BP	GO:0007612	learning	5/117	145/18866	0.00210441	0.00648914	0.00299963	PTGS2/JUN/APP/HIF1A/FOS	5
BP	GO:0060420	regulation of heart growth	4/117	87/18866	0.00210454	0.00648914	0.00299963	MAPK14/CDK1/MAPK1/GJA1	4
BP	GO:0090049	regulation of cell migration involved in sprouting angiogenesis	4/117	87/18866	0.00210454	0.00648914	0.00299963	PTGS2/KDR/HMOX1/VEGFA	4
BP	GO:0006874	cellular calcium ion homeostasis	9/117	456/18866	0.00214972	0.00662303	0.00306152	ESR1/BCL2/APP/CAV1/GJA1/PTGER3/PRKCB/CXCL11/CXCL10	9
BP	GO:0034620	cellular response to unfolded protein	5/117	146/18866	0.00216842	0.00666975	0.00308311	CCND1/HSPA5/CCL2/CXCL8/NFE2L2	5
BP	GO:0044344	cellular response to fibroblast growth factor stimulus	5/117	146/18866	0.00216842	0.00666975	0.00308311	MAPK1/CCL2/CXCL8/COL1A1/RUNX2	5
BP	GO:0006006	glucose metabolic process	6/117	214/18866	0.00218587	0.00671795	0.0031054	MAPK14/GSK3B/AKT1/TP53/IGFBP3/IGF2	6
BP	GO:0002028	regulation of sodium ion transport	4/117	88/18866	0.00219434	0.00673299	0.00311235	SCN5A/AKT1/ADRB2/NOS3	4
BP	GO:0046889	positive regulation of lipid biosynthetic process	4/117	88/18866	0.00219434	0.00673299	0.00311235	PTGS2/AKT1/IFNG/IL1B	4
BP	GO:0007043	cell-cell junction assembly	5/117	147/18866	0.00223384	0.00683196	0.0031581	IKBKB/CAV1/GJA1/IL1B/CLDN4	5
BP	GO:0070374	positive regulation of ERK1 and ERK2 cascade	6/117	215/18866	0.00223745	0.00683196	0.0031581	KDR/JUN/ICAM1/EGFR/APP/CCL2	6
BP	GO:0046006	regulation of activated T cell proliferation	3/117	42/18866	0.00223746	0.00683196	0.0031581	CASP3/IL2RA/IGF2	3
BP	GO:0048246	macrophage chemotaxis	3/117	42/18866	0.00223746	0.00683196	0.0031581	MAPK14/MAPK1/CCL2	3
BP	GO:0071470	cellular response to osmotic stress	3/117	42/18866	0.00223746	0.00683196	0.0031581	PTGS2/AKR1B1/CASP3	3
BP	GO:0072595	maintenance of protein localization in organelle	3/117	42/18866	0.00223746	0.00683196	0.0031581	AKT1/HSPA5/GJA1	3
BP	GO:0007260	tyrosine phosphorylation of STAT protein	4/117	89/18866	0.00228674	0.00697678	0.00322504	IL6R/IFNG/IL4/CAV1	4
BP	GO:0051651	maintenance of location in cell	6/117	216/18866	0.00228995	0.00698091	0.00322695	AKT1/HSPA5/CAV1/GJA1/CXCL11/CXCL10	6
BP	GO:0010675	regulation of cellular carbohydrate metabolic process	5/117	148/18866	0.00230068	0.00700231	0.00323684	GSK3B/AKT1/TP53/IGFBP3/IGF2	5
BP	GO:1903670	regulation of sprouting angiogenesis	5/117	148/18866	0.00230068	0.00700231	0.00323684	PTGS2/KDR/HMOX1/ALOX5/VEGFA	5
BP	GO:0031056	regulation of histone modification	5/117	149/18866	0.00236897	0.00720434	0.00333023	MAPK8/VEGFA/TP53/IL1B/IGF2	5
BP	GO:0043470	regulation of carbohydrate catabolic process	4/117	90/18866	0.0023818	0.00723168	0.00334287	TP53/APP/IFNG/HIF1A	4
BP	GO:0046427	positive regulation of receptor signaling pathway via JAK-STAT	4/117	90/18866	0.0023818	0.00723168	0.00334287	AKR1B1/IL6R/IFNG/IL4	4
BP	GO:0045124	regulation of bone resorption	3/117	43/18866	0.00239448	0.00726131	0.00335657	EGFR/CA2/SPP1	3
BP	GO:0002551	mast cell chemotaxis	2/117	12/18866	0.00241659	0.00726131	0.00335657	VEGFA/VEGFC	2
BP	GO:0007077	mitotic nuclear envelope disassembly	2/117	12/18866	0.00241659	0.00726131	0.00335657	CDK1/PRKCB	2
BP	GO:0010232	vascular transport	2/117	12/18866	0.00241659	0.00726131	0.00335657	ABCB1/GJA1	2
BP	GO:0031392	regulation of prostaglandin biosynthetic process	2/117	12/18866	0.00241659	0.00726131	0.00335657	PTGS2/IL1B	2
BP	GO:0042368	vitamin D biosynthetic process	2/117	12/18866	0.00241659	0.00726131	0.00335657	IFNG/IL1B	2
BP	GO:0060736	prostate gland growth	2/117	12/18866	0.00241659	0.00726131	0.00335657	AR/ESR1	2
BP	GO:0070243	regulation of thymocyte apoptotic process	2/117	12/18866	0.00241659	0.00726131	0.00335657	TP53/HIF1A	2
BP	GO:0072584	caveolin-mediated endocytosis	2/117	12/18866	0.00241659	0.00726131	0.00335657	MAPK1/CAV1	2
BP	GO:0097284	hepatocyte apoptotic process	2/117	12/18866	0.00241659	0.00726131	0.00335657	BCL2L1/RB1	2
BP	GO:0150065	regulation of deacetylase activity	2/117	12/18866	0.00241659	0.00726131	0.00335657	MAPK8/VEGFA	2
BP	GO:1904181	positive regulation of membrane depolarization	2/117	12/18866	0.00241659	0.00726131	0.00335657	KDR/PARP1	2
BP	GO:1905461	positive regulation of vascular associated smooth muscle cell apoptotic process	2/117	12/18866	0.00241659	0.00726131	0.00335657	PPARG/SOD2	2
BP	GO:0090263	positive regulation of canonical Wnt signaling pathway	5/117	150/18866	0.00243872	0.00732082	0.00338408	EGFR/XIAP/EGF/CAV1/COL1A1	5
BP	GO:0050768	negative regulation of neurogenesis	7/117	295/18866	0.00244222	0.00732082	0.00338408	GSK3B/TP53/MDM2/APP/IL1B/COL3A1/SPP1	7
BP	GO:0060828	regulation of canonical Wnt signaling pathway	7/117	295/18866	0.00244222	0.00732082	0.00338408	MAPK14/GSK3B/EGFR/XIAP/EGF/CAV1/COL1A1	7
BP	GO:0001656	metanephros development	4/117	91/18866	0.00247954	0.00741501	0.00342762	AKR1B1/BCL2/STAT1/MYC	4
BP	GO:0034103	regulation of tissue remodeling	4/117	91/18866	0.00247954	0.00741501	0.00342762	EGFR/TP53/CA2/SPP1	4
BP	GO:0042475	odontogenesis of dentin-containing tooth	4/117	91/18866	0.00247954	0.00741501	0.00342762	SCN5A/CA2/SERPINE1/RUNX2	4
BP	GO:0005996	monosaccharide metabolic process	7/117	296/18866	0.00248878	0.00743676	0.00343767	MAPK14/GSK3B/AKR1B1/AKT1/TP53/IGFBP3/IGF2	7
BP	GO:0008643	carbohydrate transport	5/117	151/18866	0.00250996	0.0074941	0.00346417	MAPK14/AKT1/IL1B/PRKCB/NFE2L2	5
BP	GO:0003015	heart process	7/117	297/18866	0.00253603	0.00756596	0.00349739	SCN5A/KCNH2/MDM2/SOD1/CAV1/GJA1/NOS3	7
BP	GO:0010463	mesenchymal cell proliferation	3/117	44/18866	0.00255817	0.00762264	0.00352359	STAT1/VEGFA/MYC	3
BP	GO:0055074	calcium ion homeostasis	9/117	468/18866	0.00255907	0.00762264	0.00352359	ESR1/BCL2/APP/CAV1/GJA1/PTGER3/PRKCB/CXCL11/CXCL10	9
BP	GO:0031341	regulation of cell killing	4/117	92/18866	0.00258	0.00767891	0.0035496	NOS2/ICAM1/IFNG/IL4	4
BP	GO:0007605	sensory perception of sound	5/117	152/18866	0.00258269	0.00768086	0.0035505	CASP3/ICAM1/BIRC5/SOD1/COL1A1	5
BP	GO:0019722	calcium-mediated signaling	6/117	222/18866	0.00262468	0.00779959	0.00360539	KDR/GSK3B/SELE/VCAM1/EGFR/CXCL8	6
BP	GO:0002697	regulation of immune effector process	9/117	470/18866	0.00263295	0.00781799	0.00361389	NOS2/STAT1/HMOX1/ICAM1/IL2RA/IFNG/IL4/CD40LG/IL1B	9
BP	GO:0016202	regulation of striated muscle tissue development	5/117	153/18866	0.00265695	0.00787065	0.00363824	MAPK14/BCL2/CDK1/MAPK1/GJA1	5
BP	GO:0045834	positive regulation of lipid metabolic process	5/117	153/18866	0.00265695	0.00787065	0.00363824	PTGS2/PPARG/AKT1/IFNG/IL1B	5
BP	GO:0071774	response to fibroblast growth factor	5/117	153/18866	0.00265695	0.00787065	0.00363824	MAPK1/CCL2/CXCL8/COL1A1/RUNX2	5
BP	GO:0002532	production of molecular mediator involved in inflammatory response	4/117	93/18866	0.00268322	0.0079174	0.00365985	NOS2/MAPK14/ALOX5/SERPINE1	4
BP	GO:0032677	regulation of interleukin-8 production	4/117	93/18866	0.00268322	0.0079174	0.00365985	RELA/F3/IL1B/SERPINE1	4
BP	GO:0061097	regulation of protein tyrosine kinase activity	4/117	93/18866	0.00268322	0.0079174	0.00365985	NCF1/APP/EGF/CAV1	4
BP	GO:0072080	nephron tubule development	4/117	93/18866	0.00268322	0.0079174	0.00365985	BCL2/STAT1/VEGFA/MYC	4
BP	GO:1904894	positive regulation of receptor signaling pathway via STAT	4/117	93/18866	0.00268322	0.0079174	0.00365985	AKR1B1/IL6R/IFNG/IL4	4
BP	GO:0006775	fat-soluble vitamin metabolic process	3/117	45/18866	0.00272861	0.00799501	0.00369572	CYP1A1/IFNG/IL1B	3
BP	GO:0007520	myoblast fusion	3/117	45/18866	0.00272861	0.00799501	0.00369572	MAPK14/IL4/CXCL10	3
BP	GO:0010828	positive regulation of glucose transmembrane transport	3/117	45/18866	0.00272861	0.00799501	0.00369572	MAPK14/AKT1/NFE2L2	3
BP	GO:0031018	endocrine pancreas development	3/117	45/18866	0.00272861	0.00799501	0.00369572	GSK3B/AKT1/IL6R	3
BP	GO:0032722	positive regulation of chemokine production	3/117	45/18866	0.00272861	0.00799501	0.00369572	IL6R/HIF1A/IL1B	3
BP	GO:0034105	positive regulation of tissue remodeling	3/117	45/18866	0.00272861	0.00799501	0.00369572	EGFR/CA2/SPP1	3
BP	GO:0034198	cellular response to amino acid starvation	3/117	45/18866	0.00272861	0.00799501	0.00369572	MAPK8/CDKN1A/MAPK1	3
BP	GO:0042771	intrinsic apoptotic signaling pathway in response to DNA damage by p53 class mediator	3/117	45/18866	0.00272861	0.00799501	0.00369572	BCL2/CDKN1A/TP53	3
BP	GO:0070266	necroptotic process	3/117	45/18866	0.00272861	0.00799501	0.00369572	TP53/CASP8/CAV1	3
BP	GO:0061351	neural precursor cell proliferation	5/117	154/18866	0.00273274	0.00800089	0.00369844	VEGFA/TP53/HIF1A/VEGFC/EGF	5
BP	GO:0006066	alcohol metabolic process	8/117	385/18866	0.00276435	0.00808716	0.00373832	AKR1B1/CYP1A1/APP/IFNG/IL4/SOD1/IL1B/PON1	8
BP	GO:0045778	positive regulation of ossification	4/117	94/18866	0.00278925	0.00814737	0.00376615	ALOX5/ADRB2/IL6R/RUNX2	4
BP	GO:0060993	kidney morphogenesis	4/117	94/18866	0.00278925	0.00814737	0.00376615	BCL2/STAT1/VEGFA/MYC	4
BP	GO:1903050	regulation of proteolysis involved in cellular protein catabolic process	6/117	225/18866	0.00280523	0.0081877	0.00378479	GSK3B/AKT1/MDM2/EGF/CAV1/NFE2L2	6
BP	GO:0007171	activation of transmembrane receptor protein tyrosine kinase activity	2/117	13/18866	0.00284441	0.00820052	0.00379072	ADRB2/EGF	2
BP	GO:0010745	negative regulation of macrophage derived foam cell differentiation	2/117	13/18866	0.00284441	0.00820052	0.00379072	PPARG/NFKBIA	2
BP	GO:0010870	positive regulation of receptor biosynthetic process	2/117	13/18866	0.00284441	0.00820052	0.00379072	IFNG/HIF1A	2
BP	GO:0030656	regulation of vitamin metabolic process	2/117	13/18866	0.00284441	0.00820052	0.00379072	IFNG/IL1B	2
BP	GO:0031953	negative regulation of protein autophosphorylation	2/117	13/18866	0.00284441	0.00820052	0.00379072	JUN/CAV1	2
BP	GO:0033089	positive regulation of T cell differentiation in thymus	2/117	13/18866	0.00284441	0.00820052	0.00379072	IL1B/IL1A	2
BP	GO:0033145	positive regulation of intracellular steroid hormone receptor signaling pathway	2/117	13/18866	0.00284441	0.00820052	0.00379072	AR/PARP1	2
BP	GO:0043568	positive regulation of insulin-like growth factor receptor signaling pathway	2/117	13/18866	0.00284441	0.00820052	0.00379072	AR/IGFBP3	2
BP	GO:0045741	positive regulation of epidermal growth factor-activated receptor activity	2/117	13/18866	0.00284441	0.00820052	0.00379072	NCF1/EGF	2
BP	GO:0061029	eyelid development in camera-type eye	2/117	13/18866	0.00284441	0.00820052	0.00379072	JUN/EGFR	2
BP	GO:0061043	regulation of vascular wound healing	2/117	13/18866	0.00284441	0.00820052	0.00379072	ALOX5/SERPINE1	2
BP	GO:0061430	bone trabecula morphogenesis	2/117	13/18866	0.00284441	0.00820052	0.00379072	MMP2/COL1A1	2
BP	GO:0071287	cellular response to manganese ion	2/117	13/18866	0.00284441	0.00820052	0.00379072	APP/HSPA5	2
BP	GO:0072683	T cell extravasation	2/117	13/18866	0.00284441	0.00820052	0.00379072	ICAM1/CCL2	2
BP	GO:0097531	mast cell migration	2/117	13/18866	0.00284441	0.00820052	0.00379072	VEGFA/VEGFC	2
BP	GO:1902947	regulation of tau-protein kinase activity	2/117	13/18866	0.00284441	0.00820052	0.00379072	RB1/IFNG	2
BP	GO:0030902	hindbrain development	5/117	156/18866	0.002889	0.00829532	0.00383454	SCN5A/BCL2/TP53/EGF/HSPA5	5
BP	GO:1901861	regulation of muscle tissue development	5/117	156/18866	0.002889	0.00829532	0.00383454	MAPK14/BCL2/CDK1/MAPK1/GJA1	5
BP	GO:0007589	body fluid secretion	4/117	95/18866	0.00289811	0.00829532	0.00383454	VEGFA/CCND1/HIF1A/CAV1	4
BP	GO:0061326	renal tubule development	4/117	95/18866	0.00289811	0.00829532	0.00383454	BCL2/STAT1/VEGFA/MYC	4
BP	GO:0070167	regulation of biomineral tissue development	4/117	95/18866	0.00289811	0.00829532	0.00383454	ALOX5/ADRB2/HIF1A/NOS3	4
BP	GO:0110149	regulation of biomineralization	4/117	95/18866	0.00289811	0.00829532	0.00383454	ALOX5/ADRB2/HIF1A/NOS3	4
BP	GO:0005978	glycogen biosynthetic process	3/117	46/18866	0.00290589	0.00829532	0.00383454	GSK3B/AKT1/IGF2	3
BP	GO:0009250	glucan biosynthetic process	3/117	46/18866	0.00290589	0.00829532	0.00383454	GSK3B/AKT1/IGF2	3
BP	GO:0010863	positive regulation of phospholipase C activity	3/117	46/18866	0.00290589	0.00829532	0.00383454	ESR1/SELE/EGFR	3
BP	GO:0043330	response to exogenous dsRNA	3/117	46/18866	0.00290589	0.00829532	0.00383454	MAPK1/NFKBIA/CAV1	3
BP	GO:0050798	activated T cell proliferation	3/117	46/18866	0.00290589	0.00829532	0.00383454	CASP3/IL2RA/IGF2	3
BP	GO:1900744	regulation of p38MAPK cascade	3/117	46/18866	0.00290589	0.00829532	0.00383454	NCF1/VEGFA/IL1B	3
BP	GO:2000142	regulation of DNA-templated transcription, initiation	3/117	46/18866	0.00290589	0.00829532	0.00383454	ESR1/JUN/TP53	3
BP	GO:0048634	regulation of muscle organ development	5/117	157/18866	0.00296952	0.00847053	0.00391553	MAPK14/BCL2/CDK1/MAPK1/GJA1	5
BP	GO:0035249	synaptic transmission, glutamatergic	4/117	96/18866	0.00300984	0.00857907	0.0039657	PTGS2/GRIA2/EGFR/CCL2	4
BP	GO:0007519	skeletal muscle tissue development	5/117	158/18866	0.00305164	0.00868508	0.00401471	MAPK14/BCL2/RB1/FOS/CAV1	5
BP	GO:1903707	negative regulation of hemopoiesis	5/117	158/18866	0.00305164	0.00868508	0.00401471	NFKBIA/ERBB2/IL4/MYC/NFE2L2	5
BP	GO:0007157	heterophilic cell-cell adhesion via plasma membrane cell adhesion molecules	3/117	47/18866	0.00309012	0.00876812	0.00405309	ICAM1/SELE/VCAM1	3
BP	GO:0014075	response to amine	3/117	47/18866	0.00309012	0.00876812	0.00405309	CDK1/ICAM1/SOD1	3
BP	GO:0035722	interleukin-12-mediated signaling pathway	3/117	47/18866	0.00309012	0.00876812	0.00405309	IFNG/SOD2/SOD1	3
BP	GO:0042551	neuron maturation	3/117	47/18866	0.00309012	0.00876812	0.00405309	BCL2/RB1/APP	3
BP	GO:0006476	protein deacetylation	4/117	97/18866	0.00312448	0.00885896	0.00409509	MAPK8/VEGFA/TP53/IFNG	4
BP	GO:0032675	regulation of interleukin-6 production	5/117	159/18866	0.00313539	0.00887654	0.00410321	IL6R/APP/IFNG/IL1B/IL1A	5
BP	GO:0050777	negative regulation of immune response	5/117	159/18866	0.00313539	0.00887654	0.00410321	PPARG/HMOX1/IL2RA/IL4/COL3A1	5
BP	GO:0043903	regulation of symbiotic process	6/117	231/18866	0.00319408	0.00903592	0.00417689	BCL2/JUN/STAT1/SLPI/CAV1/CXCL8	6
BP	GO:0046034	ATP metabolic process	7/117	311/18866	0.00327285	0.00918453	0.00424558	CDK1/TP53/APP/IFNG/IL4/HIF1A/PARP1	7
BP	GO:0010799	regulation of peptidyl-threonine phosphorylation	3/117	48/18866	0.00328136	0.00918453	0.00424558	MAPK1/APP/EGF	3
BP	GO:0033628	regulation of cell adhesion mediated by integrin	3/117	48/18866	0.00328136	0.00918453	0.00424558	DPP4/PLAU/SERPINE1	3
BP	GO:0045601	regulation of endothelial cell differentiation	3/117	48/18866	0.00328136	0.00918453	0.00424558	IKBKB/VEGFA/IL1B	3
BP	GO:0055023	positive regulation of cardiac muscle tissue growth	3/117	48/18866	0.00328136	0.00918453	0.00424558	MAPK14/CDK1/MAPK1	3
BP	GO:1900274	regulation of phospholipase C activity	3/117	48/18866	0.00328136	0.00918453	0.00424558	ESR1/SELE/EGFR	3
BP	GO:1990928	response to amino acid starvation	3/117	48/18866	0.00328136	0.00918453	0.00424558	MAPK8/CDKN1A/MAPK1	3
BP	GO:0010649	regulation of cell communication by electrical coupling	2/117	14/18866	0.00330506	0.00918453	0.00424558	CAV1/GJA1	2
BP	GO:0030213	hyaluronan biosynthetic process	2/117	14/18866	0.00330506	0.00918453	0.00424558	EGF/IL1B	2
BP	GO:0031282	regulation of guanylate cyclase activity	2/117	14/18866	0.00330506	0.00918453	0.00424558	NOS2/NOS3	2
BP	GO:0032042	mitochondrial DNA metabolic process	2/117	14/18866	0.00330506	0.00918453	0.00424558	TP53/PARP1	2
BP	GO:0032310	prostaglandin secretion	2/117	14/18866	0.00330506	0.00918453	0.00424558	NOS2/IL1B	2
BP	GO:0035437	maintenance of protein localization in endoplasmic reticulum	2/117	14/18866	0.00330506	0.00918453	0.00424558	HSPA5/GJA1	2
BP	GO:0036295	cellular response to increased oxygen levels	2/117	14/18866	0.00330506	0.00918453	0.00424558	PPARG/CAV1	2
BP	GO:0038166	angiotensin-activated signaling pathway	2/117	14/18866	0.00330506	0.00918453	0.00424558	CA2/CAV1	2
BP	GO:0045472	response to ether	2/117	14/18866	0.00330506	0.00918453	0.00424558	CDK4/MDM2	2
BP	GO:0045898	regulation of RNA polymerase II transcription preinitiation complex assembly	2/117	14/18866	0.00330506	0.00918453	0.00424558	ESR1/TP53	2
BP	GO:0047484	regulation of response to osmotic stress	2/117	14/18866	0.00330506	0.00918453	0.00424558	PTGS2/ABCB1	2
BP	GO:0051709	regulation of killing of cells of other organism	2/117	14/18866	0.00330506	0.00918453	0.00424558	NOS2/IFNG	2
BP	GO:0051917	regulation of fibrinolysis	2/117	14/18866	0.00330506	0.00918453	0.00424558	THBD/SERPINE1	2
BP	GO:0070431	nucleotide-binding oligomerization domain containing 2 signaling pathway	2/117	14/18866	0.00330506	0.00918453	0.00424558	RELA/NFKBIA	2
BP	GO:1901722	regulation of cell proliferation involved in kidney development	2/117	14/18866	0.00330506	0.00918453	0.00424558	IL6R/MYC	2
BP	GO:1903799	negative regulation of production of miRNAs involved in gene silencing by miRNA	2/117	14/18866	0.00330506	0.00918453	0.00424558	ESR1/TP53	2
BP	GO:2001279	regulation of unsaturated fatty acid biosynthetic process	2/117	14/18866	0.00330506	0.00918453	0.00424558	PTGS2/IL1B	2
BP	GO:0043255	regulation of carbohydrate biosynthetic process	4/117	99/18866	0.00336264	0.00933765	0.00431636	GSK3B/AKT1/EGF/IGF2	4
BP	GO:0035196	production of miRNAs involved in gene silencing by miRNA	3/117	49/18866	0.00347971	0.00962728	0.00445025	ESR1/EGFR/TP53	3
BP	GO:0060711	labyrinthine layer development	3/117	49/18866	0.00347971	0.00962728	0.00445025	AKT1/MAPK1/CASP8	3
BP	GO:0071349	cellular response to interleukin-12	3/117	49/18866	0.00347971	0.00962728	0.00445025	IFNG/SOD2/SOD1	3
BP	GO:0086009	membrane repolarization	3/117	49/18866	0.00347971	0.00962728	0.00445025	SCN5A/KCNH2/CAV1	3
BP	GO:1990090	cellular response to nerve growth factor stimulus	3/117	49/18866	0.00347971	0.00962728	0.00445025	AKT1/APP/HSPA5	3
BP	GO:0007088	regulation of mitotic nuclear division	5/117	163/18866	0.00348705	0.00964051	0.00445636	RB1/EGF/IL1B/IL1A/IGF2	5
BP	GO:0072503	cellular divalent inorganic cation homeostasis	9/117	492/18866	0.00356288	0.00984294	0.00454993	ESR1/BCL2/APP/CAV1/GJA1/PTGER3/PRKCB/CXCL11/CXCL10	9
BP	GO:0010522	regulation of calcium ion transport into cytosol	4/117	101/18866	0.00361288	0.00995919	0.00460367	BCL2/CAV1/CXCL11/CXCL10	4
BP	GO:0015908	fatty acid transport	4/117	101/18866	0.00361288	0.00995919	0.00460367	NOS2/PPARG/AKT1/IL1B	4
BP	GO:0042116	macrophage activation	4/117	101/18866	0.00361288	0.00995919	0.00460367	JUN/APP/IFNG/IL4	4
BP	GO:0003044	regulation of systemic arterial blood pressure mediated by a chemical signal	3/117	50/18866	0.00368525	0.0100923	0.00466519	ADRB2/SOD2/NOS3	3
BP	GO:0045646	regulation of erythrocyte differentiation	3/117	50/18866	0.00368525	0.0100923	0.00466519	MAPK14/STAT1/HIF1A	3
BP	GO:0046850	regulation of bone remodeling	3/117	50/18866	0.00368525	0.0100923	0.00466519	EGFR/CA2/SPP1	3
BP	GO:0048546	digestive tract morphogenesis	3/117	50/18866	0.00368525	0.0100923	0.00466519	BCL2/EGFR/HIF1A	3
BP	GO:0050873	brown fat cell differentiation	3/117	50/18866	0.00368525	0.0100923	0.00466519	PTGS2/MAPK14/ADRB2	3
BP	GO:0070671	response to interleukin-12	3/117	50/18866	0.00368525	0.0100923	0.00466519	IFNG/SOD2/SOD1	3
BP	GO:0097300	programmed necrotic cell death	3/117	50/18866	0.00368525	0.0100923	0.00466519	TP53/CASP8/CAV1	3
BP	GO:0101023	vascular endothelial cell proliferation	3/117	50/18866	0.00368525	0.0100923	0.00466519	PPARG/CCL2/IGF2	3
BP	GO:1905562	regulation of vascular endothelial cell proliferation	3/117	50/18866	0.00368525	0.0100923	0.00466519	PPARG/CCL2/IGF2	3
BP	GO:0055024	regulation of cardiac muscle tissue development	4/117	102/18866	0.00374262	0.010242	0.00473438	MAPK14/CDK1/MAPK1/GJA1	4
BP	GO:0051961	negative regulation of nervous system development	7/117	319/18866	0.00376165	0.0102866	0.004755	GSK3B/TP53/MDM2/APP/IL1B/COL3A1/SPP1	7
BP	GO:0035967	cellular response to topologically incorrect protein	5/117	166/18866	0.00376879	0.0102967	0.00475969	CCND1/HSPA5/CCL2/CXCL8/NFE2L2	5
BP	GO:0006089	lactate metabolic process	2/117	15/18866	0.00379813	0.0102967	0.00475969	TP53/HIF1A	2
BP	GO:0009404	toxin metabolic process	2/117	15/18866	0.00379813	0.0102967	0.00475969	CYP1A1/NFE2L2	2
BP	GO:0042362	fat-soluble vitamin biosynthetic process	2/117	15/18866	0.00379813	0.0102967	0.00475969	IFNG/IL1B	2
BP	GO:0042976	activation of Janus kinase activity	2/117	15/18866	0.00379813	0.0102967	0.00475969	IL6R/IL4	2
BP	GO:0045346	regulation of MHC class II biosynthetic process	2/117	15/18866	0.00379813	0.0102967	0.00475969	IFNG/IL4	2
BP	GO:0045651	positive regulation of macrophage differentiation	2/117	15/18866	0.00379813	0.0102967	0.00475969	RB1/CASP8	2
BP	GO:0048308	organelle inheritance	2/117	15/18866	0.00379813	0.0102967	0.00475969	CDK1/MAPK1	2
BP	GO:0048313	Golgi inheritance	2/117	15/18866	0.00379813	0.0102967	0.00475969	CDK1/MAPK1	2
BP	GO:0051044	positive regulation of membrane protein ectodomain proteolysis	2/117	15/18866	0.00379813	0.0102967	0.00475969	IFNG/IL1B	2
BP	GO:0072075	metanephric mesenchyme development	2/117	15/18866	0.00379813	0.0102967	0.00475969	STAT1/MYC	2
BP	GO:2000402	negative regulation of lymphocyte migration	2/117	15/18866	0.00379813	0.0102967	0.00475969	AKT1/CCL2	2
BP	GO:0034766	negative regulation of ion transmembrane transport	4/117	103/18866	0.00387548	0.0104913	0.00484966	AKT1/KCNH2/MMP9/CAV1	4
BP	GO:0060079	excitatory postsynaptic potential	4/117	103/18866	0.00387548	0.0104913	0.00484966	GSK3B/AKT1/ADRB2/APP	4
BP	GO:0032873	negative regulation of stress-activated MAPK cascade	3/117	51/18866	0.00389805	0.0105298	0.00486742	AKT1/GSTP1/MYC	3
BP	GO:0070303	negative regulation of stress-activated protein kinase signaling cascade	3/117	51/18866	0.00389805	0.0105298	0.00486742	AKT1/GSTP1/MYC	3
BP	GO:1903573	negative regulation of response to endoplasmic reticulum stress	3/117	51/18866	0.00389805	0.0105298	0.00486742	ALOX5/BCL2L1/HSPA5	3
BP	GO:0007204	positive regulation of cytosolic calcium ion concentration	7/117	322/18866	0.0039586	0.0106857	0.00493949	ESR1/BCL2/CAV1/GJA1/PTGER3/CXCL11/CXCL10	7
BP	GO:0060538	skeletal muscle organ development	5/117	168/18866	0.00396546	0.0106965	0.00494451	MAPK14/BCL2/RB1/FOS/CAV1	5
BP	GO:1903320	regulation of protein modification by small protein conjugation or removal	6/117	242/18866	0.0040098	0.0108053	0.00499478	RELA/AKT1/ADRB2/XIAP/HSPA5/CAV1	6
BP	GO:0002027	regulation of heart rate	4/117	104/18866	0.00401151	0.0108053	0.00499478	SCN5A/KCNH2/MDM2/CAV1	4
BP	GO:0003179	heart valve morphogenesis	3/117	52/18866	0.0041182	0.0110453	0.00510575	RB1/MDM2/NOS3	3
BP	GO:0031103	axon regeneration	3/117	52/18866	0.0041182	0.0110453	0.00510575	BCL2/JUN/SPP1	3
BP	GO:0060421	positive regulation of heart growth	3/117	52/18866	0.0041182	0.0110453	0.00510575	MAPK14/CDK1/MAPK1	3
BP	GO:0072132	mesenchyme morphogenesis	3/117	52/18866	0.0041182	0.0110453	0.00510575	MDM2/MYC/NOS3	3
BP	GO:1990089	response to nerve growth factor	3/117	52/18866	0.0041182	0.0110453	0.00510575	AKT1/APP/HSPA5	3
BP	GO:2000677	regulation of transcription regulatory region DNA binding	3/117	52/18866	0.0041182	0.0110453	0.00510575	RB1/IFNG/PARP1	3
BP	GO:0030301	cholesterol transport	4/117	105/18866	0.00415073	0.0111089	0.00513511	NFKBIA/EGF/CAV1/PON1	4
BP	GO:0044070	regulation of anion transport	4/117	105/18866	0.00415073	0.0111089	0.00513511	AKT1/CA2/ABCB1/IL1B	4
BP	GO:0062014	negative regulation of small molecule metabolic process	4/117	105/18866	0.00415073	0.0111089	0.00513511	AKT1/TP53/SOD1/PARP1	4
BP	GO:0032874	positive regulation of stress-activated MAPK cascade	5/117	170/18866	0.00416938	0.0111509	0.00515453	NCF1/VEGFA/APP/CD40LG/IL1B	5
BP	GO:0042593	glucose homeostasis	6/117	245/18866	0.00425686	0.0113768	0.00525895	PPARG/AKT1/ICAM1/ALOX5/HIF1A/RAF1	6
BP	GO:0030307	positive regulation of cell growth	5/117	171/18866	0.0042741	0.0114147	0.00527651	AKT1/BCL2/EGFR/VEGFA/ERBB2	5
BP	GO:0032414	positive regulation of ion transmembrane transporter activity	4/117	106/18866	0.00429318	0.0114405	0.00528841	ADRB2/IFNG/ABCB1/CCL2	4
BP	GO:0002523	leukocyte migration involved in inflammatory response	2/117	16/18866	0.00432318	0.0114405	0.00528841	SELE/ALOX5	2
BP	GO:0010225	response to UV-C	2/117	16/18866	0.00432318	0.0114405	0.00528841	TP53/MDM2	2
BP	GO:0030397	membrane disassembly	2/117	16/18866	0.00432318	0.0114405	0.00528841	CDK1/PRKCB	2
BP	GO:0045342	MHC class II biosynthetic process	2/117	16/18866	0.00432318	0.0114405	0.00528841	IFNG/IL4	2
BP	GO:0045725	positive regulation of glycogen biosynthetic process	2/117	16/18866	0.00432318	0.0114405	0.00528841	AKT1/IGF2	2
BP	GO:0051081	nuclear envelope disassembly	2/117	16/18866	0.00432318	0.0114405	0.00528841	CDK1/PRKCB	2
BP	GO:0060576	intestinal epithelial cell development	2/117	16/18866	0.00432318	0.0114405	0.00528841	CDKN1A/HIF1A	2
BP	GO:0061450	trophoblast cell migration	2/117	16/18866	0.00432318	0.0114405	0.00528841	VEGFA/GJA1	2
BP	GO:0071380	cellular response to prostaglandin E stimulus	2/117	16/18866	0.00432318	0.0114405	0.00528841	PPARG/AKT1	2
BP	GO:1901163	regulation of trophoblast cell migration	2/117	16/18866	0.00432318	0.0114405	0.00528841	VEGFA/GJA1	2
BP	GO:1904294	positive regulation of ERAD pathway	2/117	16/18866	0.00432318	0.0114405	0.00528841	CAV1/NFE2L2	2
BP	GO:1905050	positive regulation of metallopeptidase activity	2/117	16/18866	0.00432318	0.0114405	0.00528841	MAPK14/CLDN4	2
BP	GO:0033500	carbohydrate homeostasis	6/117	246/18866	0.00434166	0.0114601	0.00529746	PPARG/AKT1/ICAM1/ALOX5/HIF1A/RAF1	6
BP	GO:0043331	response to dsRNA	3/117	53/18866	0.00434577	0.0114601	0.00529746	MAPK1/NFKBIA/CAV1	3
BP	GO:0043392	negative regulation of DNA binding	3/117	53/18866	0.00434577	0.0114601	0.00529746	JUN/HMOX1/NFKBIA	3
BP	GO:0045661	regulation of myoblast differentiation	3/117	53/18866	0.00434577	0.0114601	0.00529746	MAPK14/CXCL10/IGFBP3	3
BP	GO:0045744	negative regulation of G protein-coupled receptor signaling pathway	3/117	53/18866	0.00434577	0.0114601	0.00529746	ADRB2/MET/CXCL8	3
BP	GO:0070304	positive regulation of stress-activated protein kinase signaling cascade	5/117	172/18866	0.00438069	0.0115441	0.00533629	NCF1/VEGFA/APP/CD40LG/IL1B	5
BP	GO:0035601	protein deacylation	4/117	107/18866	0.0044389	0.0116812	0.00539966	MAPK8/VEGFA/TP53/IFNG	4
BP	GO:0055017	cardiac muscle tissue growth	4/117	107/18866	0.0044389	0.0116812	0.00539966	MAPK14/CDK1/MAPK1/GJA1	4
BP	GO:0006937	regulation of muscle contraction	5/117	173/18866	0.00448916	0.0117887	0.00544938	PTGS2/SCN5A/ADRB2/SOD1/CAV1	5
BP	GO:0021543	pallium development	5/117	173/18866	0.00448916	0.0117887	0.00544938	GSK3B/CASP3/EGFR/HIF1A/COL3A1	5
BP	GO:0050954	sensory perception of mechanical stimulus	5/117	173/18866	0.00448916	0.0117887	0.00544938	CASP3/ICAM1/BIRC5/SOD1/COL1A1	5
BP	GO:0010524	positive regulation of calcium ion transport into cytosol	3/117	54/18866	0.00458083	0.011996	0.00554521	CAV1/CXCL11/CXCL10	3
BP	GO:0031050	dsRNA processing	3/117	54/18866	0.00458083	0.011996	0.00554521	ESR1/EGFR/TP53	3
BP	GO:0070918	production of small RNA involved in gene silencing by RNA	3/117	54/18866	0.00458083	0.011996	0.00554521	ESR1/EGFR/TP53	3
BP	GO:1901185	negative regulation of ERBB signaling pathway	3/117	54/18866	0.00458083	0.011996	0.00554521	EGFR/ERBB2/EGF	3
BP	GO:0032526	response to retinoic acid	4/117	108/18866	0.00458792	0.0120063	0.00554995	PPARG/PTGES/GJA1/COL1A1	4
BP	GO:0003205	cardiac chamber development	5/117	174/18866	0.00459953	0.0120283	0.00556013	SCN5A/TP53/MDM2/HIF1A/NOS3	5
BP	GO:0002286	T cell activation involved in immune response	4/117	109/18866	0.00474028	0.0123792	0.00572234	ICAM1/TP53/IFNG/IL4	4
BP	GO:0018958	phenol-containing compound metabolic process	4/117	109/18866	0.00474028	0.0123792	0.00572234	AKR1B1/BCL2/MAOA/TYR	4
BP	GO:0001954	positive regulation of cell-matrix adhesion	3/117	55/18866	0.00482345	0.0125703	0.00581066	KDR/GSK3B/VEGFA	3
BP	GO:0030199	collagen fibril organization	3/117	55/18866	0.00482345	0.0125703	0.00581066	RB1/COL1A1/COL3A1	3
BP	GO:0032655	regulation of interleukin-12 production	3/117	55/18866	0.00482345	0.0125703	0.00581066	MAPK14/IFNG/CD40LG	3
BP	GO:0006978	DNA damage response, signal transduction by p53 class mediator resulting in transcription of p21 class mediator	2/117	17/18866	0.00487983	0.0125954	0.00582225	CDKN1A/TP53	2
BP	GO:0015732	prostaglandin transport	2/117	17/18866	0.00487983	0.0125954	0.00582225	NOS2/IL1B	2
BP	GO:0030730	sequestering of triglyceride	2/117	17/18866	0.00487983	0.0125954	0.00582225	PPARG/IL1B	2
BP	GO:0031065	positive regulation of histone deacetylation	2/117	17/18866	0.00487983	0.0125954	0.00582225	VEGFA/TP53	2
BP	GO:0042953	lipoprotein transport	2/117	17/18866	0.00487983	0.0125954	0.00582225	PPARG/PRKCB	2
BP	GO:0050665	hydrogen peroxide biosynthetic process	2/117	17/18866	0.00487983	0.0125954	0.00582225	CYP1A1/SOD1	2
BP	GO:0055070	copper ion homeostasis	2/117	17/18866	0.00487983	0.0125954	0.00582225	APP/XIAP	2
BP	GO:0060644	mammary gland epithelial cell differentiation	2/117	17/18866	0.00487983	0.0125954	0.00582225	AKT1/HIF1A	2
BP	GO:0070242	thymocyte apoptotic process	2/117	17/18866	0.00487983	0.0125954	0.00582225	TP53/HIF1A	2
BP	GO:0070875	positive regulation of glycogen metabolic process	2/117	17/18866	0.00487983	0.0125954	0.00582225	AKT1/IGF2	2
BP	GO:0071850	mitotic cell cycle arrest	2/117	17/18866	0.00487983	0.0125954	0.00582225	CDKN1A/TP53	2
BP	GO:0090185	negative regulation of kidney development	2/117	17/18866	0.00487983	0.0125954	0.00582225	STAT1/MMP9	2
BP	GO:0090336	positive regulation of brown fat cell differentiation	2/117	17/18866	0.00487983	0.0125954	0.00582225	PTGS2/MAPK14	2
BP	GO:2001267	regulation of cysteine-type endopeptidase activity involved in apoptotic signaling pathway	2/117	17/18866	0.00487983	0.0125954	0.00582225	MMP9/CASP8	2
BP	GO:0072009	nephron epithelium development	4/117	110/18866	0.004896	0.0126285	0.00583755	BCL2/STAT1/VEGFA/MYC	4
BP	GO:0043161	proteasome-mediated ubiquitin-dependent protein catabolic process	8/117	424/18866	0.00493898	0.0127303	0.00588464	GSK3B/CDK2/AKT1/CDK1/MDM2/HSPA5/CAV1/NFE2L2	8
BP	GO:0030324	lung development	5/117	177/18866	0.00494224	0.0127303	0.00588464	PGR/EGFR/VEGFA/MAPK1/NOS3	5
BP	GO:0043588	skin development	8/117	425/18866	0.00500822	0.0128915	0.00595913	RELA/BCL2/CASP3/EGFR/MET/COL1A1/COL3A1/CLDN4	8
BP	GO:0006821	chloride transport	4/117	111/18866	0.00505512	0.0129679	0.00599448	GABRA1/CA2/ABCB1/CLDN4	4
BP	GO:0034440	lipid oxidation	4/117	111/18866	0.00505512	0.0129679	0.00599448	PPARG/MAPK14/AKT1/ALOX5	4
BP	GO:0042303	molting cycle	4/117	111/18866	0.00505512	0.0129679	0.00599448	PTGS2/RELA/BCL2/EGFR	4
BP	GO:0042633	hair cycle	4/117	111/18866	0.00505512	0.0129679	0.00599448	PTGS2/RELA/BCL2/EGFR	4
BP	GO:0098732	macromolecule deacylation	4/117	111/18866	0.00505512	0.0129679	0.00599448	MAPK8/VEGFA/TP53/IFNG	4
BP	GO:0006941	striated muscle contraction	5/117	178/18866	0.0050604	0.0129727	0.00599666	SCN5A/KCNH2/CAV1/GJA1/CHUK	5
BP	GO:0060688	regulation of morphogenesis of a branching structure	3/117	56/18866	0.0050737	0.0129891	0.00600425	AR/ESR1/VEGFA	3
BP	GO:0086065	cell communication involved in cardiac conduction	3/117	56/18866	0.0050737	0.0129891	0.00600425	SCN5A/CAV1/GJA1	3
BP	GO:0005976	polysaccharide metabolic process	4/117	112/18866	0.00521768	0.0133396	0.00616627	GSK3B/AKT1/EGF/IGF2	4
BP	GO:0099565	chemical synaptic transmission, postsynaptic	4/117	112/18866	0.00521768	0.0133396	0.00616627	GSK3B/AKT1/ADRB2/APP	4
BP	GO:0060070	canonical Wnt signaling pathway	7/117	339/18866	0.0052267	0.0133536	0.00617274	MAPK14/GSK3B/EGFR/XIAP/EGF/CAV1/COL1A1	7
BP	GO:0008016	regulation of heart contraction	6/117	256/18866	0.00525989	0.0134293	0.00620773	SCN5A/KCNH2/MDM2/CAV1/GJA1/NOS3	6
BP	GO:1990778	protein localization to cell periphery	7/117	340/18866	0.0053098	0.0135475	0.00626239	AR/IKBKB/AKT1/EGFR/BCL2L1/IFNG/CAV1	7
BP	GO:0002090	regulation of receptor internalization	3/117	57/18866	0.00533164	0.0135666	0.00627119	SELE/VEGFA/EGF	3
BP	GO:0032615	interleukin-12 production	3/117	57/18866	0.00533164	0.0135666	0.00627119	MAPK14/IFNG/CD40LG	3
BP	GO:0071398	cellular response to fatty acid	3/117	57/18866	0.00533164	0.0135666	0.00627119	PPARG/AKT1/CDK4	3
BP	GO:1905517	macrophage migration	3/117	57/18866	0.00533164	0.0135666	0.00627119	MAPK14/MAPK1/CCL2	3
BP	GO:0002223	stimulatory C-type lectin receptor signaling pathway	4/117	113/18866	0.00538371	0.0136714	0.00631963	RELA/IKBKB/RAF1/CHUK	4
BP	GO:0007009	plasma membrane organization	4/117	113/18866	0.00538371	0.0136714	0.00631963	AR/AKT1/SOD1/CAV1	4
BP	GO:0035821	modulation of process of other organism	4/117	113/18866	0.00538371	0.0136714	0.00631963	JUN/SLPI/BCL2L1/CASP8	4
BP	GO:0008361	regulation of cell size	5/117	181/18866	0.00542691	0.0137625	0.00636178	GSK3B/AKT1/VEGFA/CDK4/SPP1	5
BP	GO:0030323	respiratory tube development	5/117	181/18866	0.00542691	0.0137625	0.00636178	PGR/EGFR/VEGFA/MAPK1/NOS3	5
BP	GO:0003007	heart morphogenesis	6/117	258/18866	0.00545942	0.0137824	0.00637098	JUN/VEGFA/TP53/MDM2/HIF1A/NOS3	6
BP	GO:0042772	DNA damage response, signal transduction resulting in transcription	2/117	18/18866	0.00546765	0.0137824	0.00637098	CDKN1A/TP53	2
BP	GO:0043217	myelin maintenance	2/117	18/18866	0.00546765	0.0137824	0.00637098	AKT1/SOD1	2
BP	GO:0044872	lipoprotein localization	2/117	18/18866	0.00546765	0.0137824	0.00637098	PPARG/PRKCB	2
BP	GO:0071318	cellular response to ATP	2/117	18/18866	0.00546765	0.0137824	0.00637098	PTGS2/SOD1	2
BP	GO:0071605	monocyte chemotactic protein-1 production	2/117	18/18866	0.00546765	0.0137824	0.00637098	GSTP1/IL1B	2
BP	GO:0071637	regulation of monocyte chemotactic protein-1 production	2/117	18/18866	0.00546765	0.0137824	0.00637098	GSTP1/IL1B	2
BP	GO:1900221	regulation of amyloid-beta clearance	2/117	18/18866	0.00546765	0.0137824	0.00637098	IFNG/IL4	2
BP	GO:1990000	amyloid fibril formation	2/117	18/18866	0.00546765	0.0137824	0.00637098	MDM2/APP	2
BP	GO:2001252	positive regulation of chromosome organization	5/117	182/18866	0.00555315	0.0139795	0.00646206	VEGFA/MAPK1/RB1/TP53/IL1B	5
BP	GO:0022037	metencephalon development	4/117	114/18866	0.00555324	0.0139795	0.00646206	SCN5A/BCL2/TP53/HSPA5	4
BP	GO:0021537	telencephalon development	6/117	259/18866	0.00556124	0.0139903	0.00646705	SCN5A/GSK3B/CASP3/EGFR/HIF1A/COL3A1	6
BP	GO:0000768	syncytium formation by plasma membrane fusion	3/117	58/18866	0.00559735	0.0140624	0.00650038	MAPK14/IL4/CXCL10	3
BP	GO:0140253	cell-cell fusion	3/117	58/18866	0.00559735	0.0140624	0.00650038	MAPK14/IL4/CXCL10	3
BP	GO:1903362	regulation of cellular protein catabolic process	6/117	260/18866	0.00566444	0.0142214	0.00657391	GSK3B/AKT1/MDM2/EGF/CAV1/NFE2L2	6
BP	GO:0030177	positive regulation of Wnt signaling pathway	5/117	183/18866	0.00568145	0.0142452	0.00658488	EGFR/XIAP/EGF/CAV1/COL1A1	5
BP	GO:0043433	negative regulation of DNA-binding transcription factor activity	5/117	183/18866	0.00568145	0.0142452	0.00658488	ESR1/HMOX1/RB1/NFKBIA/CHUK	5
BP	GO:0048640	negative regulation of developmental growth	4/117	115/18866	0.0057263	0.0143386	0.00662805	ADRB2/CDKN1A/GJA1/SPP1	4
BP	GO:0060419	heart growth	4/117	115/18866	0.0057263	0.0143386	0.00662805	MAPK14/CDK1/MAPK1/GJA1	4
BP	GO:0002695	negative regulation of leukocyte activation	5/117	184/18866	0.00581183	0.0145431	0.00672258	CASP3/HMOX1/ERBB2/IL2RA/IL4	5
BP	GO:0001658	branching involved in ureteric bud morphogenesis	3/117	59/18866	0.00587088	0.0146616	0.00677739	BCL2/VEGFA/MYC	3
BP	GO:0031102	neuron projection regeneration	3/117	59/18866	0.00587088	0.0146616	0.00677739	BCL2/JUN/SPP1	3
BP	GO:0098930	axonal transport	3/117	59/18866	0.00587088	0.0146616	0.00677739	HIF1A/SOD1/HSPB1	3
BP	GO:0002220	innate immune response activating cell surface receptor signaling pathway	4/117	116/18866	0.00590292	0.0147222	0.00680537	RELA/IKBKB/RAF1/CHUK	4
BP	GO:0060964	regulation of gene silencing by miRNA	4/117	116/18866	0.00590292	0.0147222	0.00680537	ESR1/PPARG/EGFR/TP53	4
BP	GO:0002758	innate immune response-activating signal transduction	4/117	117/18866	0.00608314	0.0150402	0.00695236	RELA/IKBKB/RAF1/CHUK	4
BP	GO:0014902	myotube differentiation	4/117	117/18866	0.00608314	0.0150402	0.00695236	MAPK14/BCL2/IL4/CXCL10	4
BP	GO:0030282	bone mineralization	4/117	117/18866	0.00608314	0.0150402	0.00695236	PTGS2/ALOX5/ADRB2/HIF1A	4
BP	GO:0010544	negative regulation of platelet activation	2/117	19/18866	0.00608626	0.0150402	0.00695236	NOS3/THBD	2
BP	GO:0010759	positive regulation of macrophage chemotaxis	2/117	19/18866	0.00608626	0.0150402	0.00695236	MAPK14/MAPK1	2
BP	GO:0019054	modulation by virus of host cellular process	2/117	19/18866	0.00608626	0.0150402	0.00695236	BCL2L1/CASP8	2
BP	GO:0032026	response to magnesium ion	2/117	19/18866	0.00608626	0.0150402	0.00695236	CCND1/MDM2	2
BP	GO:0033189	response to vitamin A	2/117	19/18866	0.00608626	0.0150402	0.00695236	PPARG/CYP1A1	2
BP	GO:0048245	eosinophil chemotaxis	2/117	19/18866	0.00608626	0.0150402	0.00695236	IL4/CCL2	2
BP	GO:0072074	kidney mesenchyme development	2/117	19/18866	0.00608626	0.0150402	0.00695236	STAT1/MYC	2
BP	GO:0090026	positive regulation of monocyte chemotaxis	2/117	19/18866	0.00608626	0.0150402	0.00695236	SERPINE1/CXCL10	2
BP	GO:1905288	vascular associated smooth muscle cell apoptotic process	2/117	19/18866	0.00608626	0.0150402	0.00695236	PPARG/SOD2	2
BP	GO:1905459	regulation of vascular associated smooth muscle cell apoptotic process	2/117	19/18866	0.00608626	0.0150402	0.00695236	PPARG/SOD2	2
BP	GO:2000696	regulation of epithelial cell differentiation involved in kidney development	2/117	19/18866	0.00608626	0.0150402	0.00695236	STAT1/MMP9	2
BP	GO:0048863	stem cell differentiation	6/117	264/18866	0.00609132	0.0150428	0.00695359	ESR1/MAPK1/TP53/HIF1A/NFE2L2/RUNX2	6
BP	GO:0006949	syncytium formation	3/117	60/18866	0.00615228	0.0151636	0.00700941	MAPK14/IL4/CXCL10	3
BP	GO:0010823	negative regulation of mitochondrion organization	3/117	60/18866	0.00615228	0.0151636	0.00700941	AKT1/BCL2L1/TP53	3
BP	GO:0050994	regulation of lipid catabolic process	3/117	60/18866	0.00615228	0.0151636	0.00700941	AKT1/CDK4/IL1B	3
BP	GO:0002285	lymphocyte activation involved in immune response	5/117	187/18866	0.00621563	0.0152897	0.00706772	ICAM1/TP53/IFNG/IL4/CD40LG	5
BP	GO:0043409	negative regulation of MAPK cascade	5/117	187/18866	0.00621563	0.0152897	0.00706772	AKT1/GSTP1/CAV1/MYC/IL1B	5
BP	GO:0045333	cellular respiration	5/117	187/18866	0.00621563	0.0152897	0.00706772	NOS2/CDK1/IFNG/IL4/HIF1A	5
BP	GO:0021987	cerebral cortex development	4/117	118/18866	0.00626699	0.015396	0.00711684	GSK3B/EGFR/HIF1A/COL3A1	4
BP	GO:0050868	negative regulation of T cell activation	4/117	118/18866	0.00626699	0.015396	0.00711684	CASP3/ERBB2/IL2RA/IL4	4
BP	GO:0009165	nucleotide biosynthetic process	6/117	266/18866	0.00631335	0.0154998	0.00716482	NOS2/PTGS2/MAPK1/IL4/NOS3/PARP1	6
BP	GO:0051783	regulation of nuclear division	5/117	188/18866	0.0063545	0.0155907	0.00720683	RB1/EGF/IL1B/IL1A/IGF2	5
BP	GO:0003170	heart valve development	3/117	61/18866	0.00644163	0.0157634	0.00728668	RB1/MDM2/NOS3	3
BP	GO:0033619	membrane protein proteolysis	3/117	61/18866	0.00644163	0.0157634	0.00728668	RELA/IFNG/IL1B	3
BP	GO:0046324	regulation of glucose import	3/117	61/18866	0.00644163	0.0157634	0.00728668	MAPK14/AKT1/NFE2L2	3
BP	GO:1903078	positive regulation of protein localization to plasma membrane	3/117	61/18866	0.00644163	0.0157634	0.00728668	AKT1/EGFR/IFNG	3
BP	GO:0051153	regulation of striated muscle cell differentiation	4/117	119/18866	0.0064545	0.0157846	0.00729651	MAPK14/BCL2/IL4/CXCL10	4
BP	GO:0015850	organic hydroxy compound transport	6/117	268/18866	0.00654122	0.0159864	0.00738975	PPARG/NFKBIA/EGF/CAV1/SPP1/PON1	6
BP	GO:0051048	negative regulation of secretion	5/117	190/18866	0.00663878	0.0162102	0.00749321	HMOX1/EGF/GJA1/IL1B/PTGER3	5
BP	GO:0060147	regulation of posttranscriptional gene silencing	4/117	120/18866	0.0066457	0.0162102	0.00749321	ESR1/PPARG/EGFR/TP53	4
BP	GO:0060966	regulation of gene silencing by RNA	4/117	120/18866	0.0066457	0.0162102	0.00749321	ESR1/PPARG/EGFR/TP53	4
BP	GO:1901293	nucleoside phosphate biosynthetic process	6/117	269/18866	0.00665738	0.0162278	0.00750133	NOS2/PTGS2/MAPK1/IL4/NOS3/PARP1	6
BP	GO:0002689	negative regulation of leukocyte chemotaxis	2/117	20/18866	0.00673525	0.0162278	0.00750133	DPP4/CCL2	2
BP	GO:0003085	negative regulation of systemic arterial blood pressure	2/117	20/18866	0.00673525	0.0162278	0.00750133	ADRB2/SOD2	2
BP	GO:0006525	arginine metabolic process	2/117	20/18866	0.00673525	0.0162278	0.00750133	NOS2/NOS3	2
BP	GO:0015669	gas transport	2/117	20/18866	0.00673525	0.0162278	0.00750133	CA2/MYC	2
BP	GO:0032332	positive regulation of chondrocyte differentiation	2/117	20/18866	0.00673525	0.0162278	0.00750133	RELA/RUNX2	2
BP	GO:0032727	positive regulation of interferon-alpha production	2/117	20/18866	0.00673525	0.0162278	0.00750133	STAT1/CHUK	2
BP	GO:0034138	toll-like receptor 3 signaling pathway	2/117	20/18866	0.00673525	0.0162278	0.00750133	CASP8/CAV1	2
BP	GO:0036303	lymph vessel morphogenesis	2/117	20/18866	0.00673525	0.0162278	0.00750133	VEGFA/VEGFC	2
BP	GO:0060546	negative regulation of necroptotic process	2/117	20/18866	0.00673525	0.0162278	0.00750133	CASP8/CAV1	2
BP	GO:0062099	negative regulation of programmed necrotic cell death	2/117	20/18866	0.00673525	0.0162278	0.00750133	CASP8/CAV1	2
BP	GO:0086014	atrial cardiac muscle cell action potential	2/117	20/18866	0.00673525	0.0162278	0.00750133	SCN5A/GJA1	2
BP	GO:0086026	atrial cardiac muscle cell to AV node cell signaling	2/117	20/18866	0.00673525	0.0162278	0.00750133	SCN5A/GJA1	2
BP	GO:0086066	atrial cardiac muscle cell to AV node cell communication	2/117	20/18866	0.00673525	0.0162278	0.00750133	SCN5A/GJA1	2
BP	GO:0097709	connective tissue replacement	2/117	20/18866	0.00673525	0.0162278	0.00750133	HIF1A/IL1A	2
BP	GO:1901741	positive regulation of myoblast fusion	2/117	20/18866	0.00673525	0.0162278	0.00750133	MAPK14/IL4	2
BP	GO:2001169	regulation of ATP biosynthetic process	2/117	20/18866	0.00673525	0.0162278	0.00750133	IL4/PARP1	2
BP	GO:0010518	positive regulation of phospholipase activity	3/117	62/18866	0.00673897	0.0162278	0.00750133	ESR1/SELE/EGFR	3
BP	GO:0055025	positive regulation of cardiac muscle tissue development	3/117	62/18866	0.00673897	0.0162278	0.00750133	MAPK14/CDK1/MAPK1	3
BP	GO:0140115	export across plasma membrane	3/117	62/18866	0.00673897	0.0162278	0.00750133	KCNH2/ABCB1/GJA1	3
BP	GO:0031398	positive regulation of protein ubiquitination	4/117	121/18866	0.00684061	0.016462	0.00760962	ADRB2/XIAP/HSPA5/CAV1	4
BP	GO:0051480	regulation of cytosolic calcium ion concentration	7/117	357/18866	0.00687992	0.016546	0.00764846	ESR1/BCL2/CAV1/GJA1/PTGER3/CXCL11/CXCL10	7
BP	GO:0006839	mitochondrial transport	6/117	271/18866	0.00689418	0.0165698	0.00765943	GSK3B/BCL2/MAPK8/BCL2L1/TP53/CASP8	6
BP	GO:0016525	negative regulation of angiogenesis	5/117	192/18866	0.00693187	0.0166497	0.0076964	PPARG/STAT1/ALOX5/SERPINE1/CXCL10	5
BP	GO:0051928	positive regulation of calcium ion transport	4/117	122/18866	0.00703928	0.016897	0.00781068	CAV1/CCL2/CXCL11/CXCL10	4
BP	GO:0070059	intrinsic apoptotic signaling pathway in response to endoplasmic reticulum stress	3/117	63/18866	0.00704436	0.0168984	0.00781134	BCL2/BCL2L1/TP53	3
BP	GO:0061136	regulation of proteasomal protein catabolic process	5/117	193/18866	0.00708177	0.0169773	0.00784783	GSK3B/AKT1/MDM2/CAV1/NFE2L2	5
BP	GO:0006260	DNA replication	6/117	273/18866	0.00713705	0.017099	0.00790407	CDK2/JUN/CDK1/EGFR/TP53/EGF	6
BP	GO:2000181	negative regulation of blood vessel morphogenesis	5/117	194/18866	0.00723391	0.0173201	0.00800626	PPARG/STAT1/ALOX5/SERPINE1/CXCL10	5
BP	GO:0070252	actin-mediated cell contraction	4/117	123/18866	0.00724173	0.0173278	0.00800982	SCN5A/KCNH2/CAV1/GJA1	4
BP	GO:0042130	negative regulation of T cell proliferation	3/117	64/18866	0.00735785	0.0175833	0.00812795	CASP3/ERBB2/IL2RA	3
BP	GO:0070265	necrotic cell death	3/117	64/18866	0.00735785	0.0175833	0.00812795	TP53/CASP8/CAV1	3
BP	GO:1902275	regulation of chromatin organization	5/117	195/18866	0.00738833	0.0175843	0.0081284	MAPK8/VEGFA/TP53/IL1B/IGF2	5
BP	GO:0002693	positive regulation of cellular extravasation	2/117	21/18866	0.00741422	0.0175843	0.0081284	ICAM1/SELE	2
BP	GO:0009110	vitamin biosynthetic process	2/117	21/18866	0.00741422	0.0175843	0.0081284	IFNG/IL1B	2
BP	GO:0010829	negative regulation of glucose transmembrane transport	2/117	21/18866	0.00741422	0.0175843	0.0081284	IL1B/PRKCB	2
BP	GO:0010893	positive regulation of steroid biosynthetic process	2/117	21/18866	0.00741422	0.0175843	0.0081284	IFNG/IL1B	2
BP	GO:0030220	platelet formation	2/117	21/18866	0.00741422	0.0175843	0.0081284	CASP3/CASP9	2
BP	GO:0030878	thyroid gland development	2/117	21/18866	0.00741422	0.0175843	0.0081284	MAPK1/RAF1	2
BP	GO:0043651	linoleic acid metabolic process	2/117	21/18866	0.00741422	0.0175843	0.0081284	ALOX5/GSTP1	2
BP	GO:0046716	muscle cell cellular homeostasis	2/117	21/18866	0.00741422	0.0175843	0.0081284	HIF1A/SOD1	2
BP	GO:0060716	labyrinthine layer blood vessel development	2/117	21/18866	0.00741422	0.0175843	0.0081284	AKT1/MAPK1	2
BP	GO:0090201	negative regulation of release of cytochrome c from mitochondria	2/117	21/18866	0.00741422	0.0175843	0.0081284	AKT1/BCL2L1	2
BP	GO:1904886	beta-catenin destruction complex disassembly	2/117	21/18866	0.00741422	0.0175843	0.0081284	GSK3B/CAV1	2
BP	GO:0003014	renal system process	4/117	125/18866	0.00765809	0.0181513	0.00839048	AKR1B1/BCL2/GJA1/CLDN4	4
BP	GO:0048247	lymphocyte chemotaxis	3/117	65/18866	0.00767949	0.0181791	0.00840337	CCL2/CXCL11/CXCL10	3
BP	GO:0060675	ureteric bud morphogenesis	3/117	65/18866	0.00767949	0.0181791	0.00840337	BCL2/VEGFA/MYC	3
BP	GO:0006694	steroid biosynthetic process	5/117	197/18866	0.00770405	0.018203	0.00841439	AKR1B1/CYP1A1/IFNG/SOD1/IL1B	5
BP	GO:0009749	response to glucose	5/117	197/18866	0.00770405	0.018203	0.00841439	CASP3/ICAM1/HIF1A/RAF1/GJA1	5
BP	GO:0051216	cartilage development	5/117	197/18866	0.00770405	0.018203	0.00841439	MAPK14/RELA/HIF1A/COL1A1/RUNX2	5
BP	GO:0050922	negative regulation of chemotaxis	3/117	66/18866	0.00800933	0.0189006	0.00873688	DPP4/GSTP1/CCL2	3
BP	GO:0072171	mesonephric tubule morphogenesis	3/117	66/18866	0.00800933	0.0189006	0.00873688	BCL2/VEGFA/MYC	3
BP	GO:0014066	regulation of phosphatidylinositol 3-kinase signaling	4/117	127/18866	0.00808992	0.0190373	0.00880007	KDR/NCF1/EGFR/MAPK1	4
BP	GO:0019079	viral genome replication	4/117	127/18866	0.00808992	0.0190373	0.00880007	BCL2/SLPI/CCL2/CXCL8	4
BP	GO:0010888	negative regulation of lipid storage	2/117	22/18866	0.0081228	0.0190373	0.00880007	PPARG/NFKBIA	2
BP	GO:0035584	calcium-mediated signaling using intracellular calcium source	2/117	22/18866	0.0081228	0.0190373	0.00880007	KDR/VCAM1	2
BP	GO:0036344	platelet morphogenesis	2/117	22/18866	0.0081228	0.0190373	0.00880007	CASP3/CASP9	2
BP	GO:0045655	regulation of monocyte differentiation	2/117	22/18866	0.0081228	0.0190373	0.00880007	JUN/MYC	2
BP	GO:0045663	positive regulation of myoblast differentiation	2/117	22/18866	0.0081228	0.0190373	0.00880007	MAPK14/IGFBP3	2
BP	GO:0051000	positive regulation of nitric-oxide synthase activity	2/117	22/18866	0.0081228	0.0190373	0.00880007	AKT1/HIF1A	2
BP	GO:0071379	cellular response to prostaglandin stimulus	2/117	22/18866	0.0081228	0.0190373	0.00880007	PPARG/AKT1	2
BP	GO:0071459	protein localization to chromosome, centromeric region	2/117	22/18866	0.0081228	0.0190373	0.00880007	CDK1/RB1	2
BP	GO:2000479	regulation of cAMP-dependent protein kinase activity	2/117	22/18866	0.0081228	0.0190373	0.00880007	ADRB2/CXCL10	2
BP	GO:0072659	protein localization to plasma membrane	6/117	281/18866	0.00817083	0.019138	0.00884661	AR/IKBKB/AKT1/EGFR/BCL2L1/IFNG	6
BP	GO:0014013	regulation of gliogenesis	4/117	128/18866	0.00831171	0.0194559	0.00899356	PPARG/RELA/CDK1/IL1B	4
BP	GO:0070613	regulation of protein processing	3/117	67/18866	0.00834742	0.0195153	0.009021	MDM2/XIAP/SERPINE1	3
BP	GO:1900015	regulation of cytokine production involved in inflammatory response	3/117	67/18866	0.00834742	0.0195153	0.009021	NOS2/MAPK14/ALOX5	3
BP	GO:1901605	alpha-amino acid metabolic process	5/117	202/18866	0.00853426	0.0199397	0.0092172	NOS2/TYR/DPEP1/ODC1/NOS3	5
BP	GO:1904377	positive regulation of protein localization to cell periphery	3/117	68/18866	0.00869379	0.0202999	0.00938369	AKT1/EGFR/IFNG	3
BP	GO:0016570	histone modification	8/117	468/18866	0.00875859	0.0204385	0.00944778	CDK2/MAPK8/CDK1/VEGFA/TP53/IL1B/PRKCB/IGF2	8
BP	GO:0000002	mitochondrial genome maintenance	2/117	23/18866	0.00886059	0.0204989	0.0094757	TP53/PARP1	2
BP	GO:0006582	melanin metabolic process	2/117	23/18866	0.00886059	0.0204989	0.0094757	BCL2/TYR	2
BP	GO:0035743	CD4-positive, alpha-beta T cell cytokine production	2/117	23/18866	0.00886059	0.0204989	0.0094757	IL4/IL1B	2
BP	GO:0045649	regulation of macrophage differentiation	2/117	23/18866	0.00886059	0.0204989	0.0094757	RB1/CASP8	2
BP	GO:0045723	positive regulation of fatty acid biosynthetic process	2/117	23/18866	0.00886059	0.0204989	0.0094757	PTGS2/IL1B	2
BP	GO:0051043	regulation of membrane protein ectodomain proteolysis	2/117	23/18866	0.00886059	0.0204989	0.0094757	IFNG/IL1B	2
BP	GO:0060547	negative regulation of necrotic cell death	2/117	23/18866	0.00886059	0.0204989	0.0094757	CASP8/CAV1	2
BP	GO:0072215	regulation of metanephros development	2/117	23/18866	0.00886059	0.0204989	0.0094757	STAT1/MYC	2
BP	GO:0072677	eosinophil migration	2/117	23/18866	0.00886059	0.0204989	0.0094757	IL4/CCL2	2
BP	GO:1901032	negative regulation of response to reactive oxygen species	2/117	23/18866	0.00886059	0.0204989	0.0094757	MET/NFE2L2	2
BP	GO:1902254	negative regulation of intrinsic apoptotic signaling pathway by p53 class mediator	2/117	23/18866	0.00886059	0.0204989	0.0094757	BCL2/MDM2	2
BP	GO:1903206	negative regulation of hydrogen peroxide-induced cell death	2/117	23/18866	0.00886059	0.0204989	0.0094757	MET/NFE2L2	2
BP	GO:1903589	positive regulation of blood vessel endothelial cell proliferation involved in sprouting angiogenesis	2/117	23/18866	0.00886059	0.0204989	0.0094757	HMOX1/VEGFA	2
BP	GO:2000810	regulation of bicellular tight junction assembly	2/117	23/18866	0.00886059	0.0204989	0.0094757	IKBKB/GJA1	2
BP	GO:0060541	respiratory system development	5/117	204/18866	0.00888307	0.0205383	0.00949392	PGR/EGFR/VEGFA/MAPK1/NOS3	5
BP	GO:0003206	cardiac chamber morphogenesis	4/117	131/18866	0.00900091	0.0207726	0.00960221	TP53/MDM2/HIF1A/NOS3	4
BP	GO:0003231	cardiac ventricle development	4/117	131/18866	0.00900091	0.0207726	0.00960221	SCN5A/MDM2/HIF1A/NOS3	4
BP	GO:0046887	positive regulation of hormone secretion	4/117	131/18866	0.00900091	0.0207726	0.00960221	EGFR/HIF1A/GJA1/SPP1	4
BP	GO:1903317	regulation of protein maturation	3/117	69/18866	0.0090485	0.0208697	0.00964707	MDM2/XIAP/SERPINE1	3
BP	GO:0035637	multicellular organismal signaling	5/117	206/18866	0.00924162	0.021302	0.00984694	SCN5A/KCNH2/SOD1/CAV1/GJA1	5
BP	GO:0002534	cytokine production involved in inflammatory response	3/117	70/18866	0.00941158	0.0216805	0.0100219	NOS2/MAPK14/ALOX5	3
BP	GO:1901343	negative regulation of vasculature development	5/117	207/18866	0.00942459	0.0216973	0.0100296	PPARG/STAT1/ALOX5/SERPINE1/CXCL10	5
BP	GO:0007095	mitotic G2 DNA damage checkpoint	2/117	24/18866	0.0096272	0.0220292	0.0101831	CDK1/CDKN1A	2
BP	GO:0010640	regulation of platelet-derived growth factor receptor signaling pathway	2/117	24/18866	0.0096272	0.0220292	0.0101831	F7/F3	2
BP	GO:0032469	endoplasmic reticulum calcium ion homeostasis	2/117	24/18866	0.0096272	0.0220292	0.0101831	BCL2/APP	2
BP	GO:0034695	response to prostaglandin E	2/117	24/18866	0.0096272	0.0220292	0.0101831	PPARG/AKT1	2
BP	GO:0044346	fibroblast apoptotic process	2/117	24/18866	0.0096272	0.0220292	0.0101831	TP53/MYC	2
BP	GO:0050995	negative regulation of lipid catabolic process	2/117	24/18866	0.0096272	0.0220292	0.0101831	AKT1/IL1B	2
BP	GO:0051349	positive regulation of lyase activity	2/117	24/18866	0.0096272	0.0220292	0.0101831	NOS2/NOS3	2
BP	GO:0086064	cell communication by electrical coupling involved in cardiac conduction	2/117	24/18866	0.0096272	0.0220292	0.0101831	CAV1/GJA1	2
BP	GO:0090335	regulation of brown fat cell differentiation	2/117	24/18866	0.0096272	0.0220292	0.0101831	PTGS2/MAPK14	2
BP	GO:2000637	positive regulation of gene silencing by miRNA	2/117	24/18866	0.0096272	0.0220292	0.0101831	EGFR/TP53	2
BP	GO:0034754	cellular hormone metabolic process	4/117	134/18866	0.00972643	0.0222293	0.0102756	ESR1/AKR1B1/CYP1A1/SPP1	4
BP	GO:0045995	regulation of embryonic development	4/117	134/18866	0.00972643	0.0222293	0.0102756	AR/CDK1/GJA1/NFE2L2	4
BP	GO:0033692	cellular polysaccharide biosynthetic process	3/117	71/18866	0.00978307	0.0223084	0.0103122	GSK3B/AKT1/IGF2	3
BP	GO:0042531	positive regulation of tyrosine phosphorylation of STAT protein	3/117	71/18866	0.00978307	0.0223084	0.0103122	IL6R/IFNG/IL4	3
BP	GO:0050891	multicellular organismal water homeostasis	3/117	71/18866	0.00978307	0.0223084	0.0103122	AKR1B1/MET/CLDN4	3
BP	GO:0006909	phagocytosis	7/117	382/18866	0.00978471	0.0223084	0.0103122	PPARG/MAPK1/IFNG/MET/SOD1/IL1B/CCL2	7
BP	GO:0001654	eye development	7/117	384/18866	0.0100506	0.0229009	0.010586	BCL2/JUN/CYP1A1/EGFR/VEGFA/CDK4/HIF1A	7
BP	GO:0044262	cellular carbohydrate metabolic process	6/117	294/18866	0.0100745	0.0229415	0.0106048	GSK3B/AKR1B1/AKT1/TP53/IGFBP3/IGF2	6
BP	GO:0042440	pigment metabolic process	3/117	72/18866	0.010163	0.023129	0.0106914	BCL2/HMOX1/TYR	3
BP	GO:0002703	regulation of leukocyte mediated immunity	5/117	211/18866	0.0101815	0.0231431	0.010698	NOS2/HMOX1/ICAM1/IL4/IL1B	5
BP	GO:0031396	regulation of protein ubiquitination	5/117	211/18866	0.0101815	0.0231431	0.010698	AKT1/ADRB2/XIAP/HSPA5/CAV1	5
BP	GO:0016569	covalent chromatin modification	8/117	481/18866	0.0102267	0.0232318	0.010739	CDK2/MAPK8/CDK1/VEGFA/TP53/IL1B/PRKCB/IGF2	8
BP	GO:0031647	regulation of protein stability	6/117	296/18866	0.0103932	0.0235767	0.0108984	BCL2/CASP3/CDKN1A/MAPK1/TP53/MDM2	6
BP	GO:0032647	regulation of interferon-alpha production	2/117	25/18866	0.0104223	0.0235767	0.0108984	STAT1/CHUK	2
BP	GO:0050857	positive regulation of antigen receptor-mediated signaling pathway	2/117	25/18866	0.0104223	0.0235767	0.0108984	RELA/PRKCB	2
BP	GO:0051894	positive regulation of focal adhesion assembly	2/117	25/18866	0.0104223	0.0235767	0.0108984	KDR/VEGFA	2
BP	GO:0060148	positive regulation of posttranscriptional gene silencing	2/117	25/18866	0.0104223	0.0235767	0.0108984	EGFR/TP53	2
BP	GO:0060575	intestinal epithelial cell differentiation	2/117	25/18866	0.0104223	0.0235767	0.0108984	CDKN1A/HIF1A	2
BP	GO:0061436	establishment of skin barrier	2/117	25/18866	0.0104223	0.0235767	0.0108984	MET/CLDN4	2
BP	GO:0010498	proteasomal protein catabolic process	8/117	483/18866	0.0104678	0.0236656	0.0109395	GSK3B/CDK2/AKT1/CDK1/MDM2/HSPA5/CAV1/NFE2L2	8
BP	GO:0005977	glycogen metabolic process	3/117	73/18866	0.0105514	0.0237833	0.0109939	GSK3B/AKT1/IGF2	3
BP	GO:0010517	regulation of phospholipase activity	3/117	73/18866	0.0105514	0.0237833	0.0109939	ESR1/SELE/EGFR	3
BP	GO:0051155	positive regulation of striated muscle cell differentiation	3/117	73/18866	0.0105514	0.0237833	0.0109939	MAPK14/BCL2/IL4	3
BP	GO:0051966	regulation of synaptic transmission, glutamatergic	3/117	73/18866	0.0105514	0.0237833	0.0109939	PTGS2/EGFR/CCL2	3
BP	GO:0072078	nephron tubule morphogenesis	3/117	73/18866	0.0105514	0.0237833	0.0109939	BCL2/VEGFA/MYC	3
BP	GO:0016051	carbohydrate biosynthetic process	5/117	213/18866	0.0105752	0.0238226	0.0110121	GSK3B/AKR1B1/AKT1/EGF/IGF2	5
BP	GO:0150063	visual system development	7/117	388/18866	0.0105983	0.0238605	0.0110296	BCL2/JUN/CYP1A1/EGFR/VEGFA/CDK4/HIF1A	7
BP	GO:0001508	action potential	4/117	138/18866	0.0107515	0.0241764	0.0111756	SCN5A/KCNH2/CAV1/GJA1	4
BP	GO:0046330	positive regulation of JNK cascade	4/117	138/18866	0.0107515	0.0241764	0.0111756	NCF1/APP/CD40LG/IL1B	4
BP	GO:0006073	cellular glucan metabolic process	3/117	74/18866	0.0109484	0.0245314	0.0113397	GSK3B/AKT1/IGF2	3
BP	GO:0006305	DNA alkylation	3/117	74/18866	0.0109484	0.0245314	0.0113397	FOS/MYC/PARP1	3
BP	GO:0006306	DNA methylation	3/117	74/18866	0.0109484	0.0245314	0.0113397	FOS/MYC/PARP1	3
BP	GO:0032481	positive regulation of type I interferon production	3/117	74/18866	0.0109484	0.0245314	0.0113397	RELA/STAT1/CHUK	3
BP	GO:0044042	glucan metabolic process	3/117	74/18866	0.0109484	0.0245314	0.0113397	GSK3B/AKT1/IGF2	3
BP	GO:2001259	positive regulation of cation channel activity	3/117	74/18866	0.0109484	0.0245314	0.0113397	ADRB2/IFNG/CCL2	3
BP	GO:0030900	forebrain development	7/117	391/18866	0.0110231	0.0246842	0.0114104	SCN5A/GSK3B/CASP3/EGFR/APP/HIF1A/COL3A1	7
BP	GO:0001945	lymph vessel development	2/117	26/18866	0.0112454	0.0249743	0.0115445	VEGFA/VEGFC	2
BP	GO:0002227	innate immune response in mucosa	2/117	26/18866	0.0112454	0.0249743	0.0115445	NOS2/IL4	2
BP	GO:0032743	positive regulation of interleukin-2 production	2/117	26/18866	0.0112454	0.0249743	0.0115445	IL1B/IL1A	2
BP	GO:0035235	ionotropic glutamate receptor signaling pathway	2/117	26/18866	0.0112454	0.0249743	0.0115445	GRIA2/APP	2
BP	GO:0042104	positive regulation of activated T cell proliferation	2/117	26/18866	0.0112454	0.0249743	0.0115445	IL2RA/IGF2	2
BP	GO:0043567	regulation of insulin-like growth factor receptor signaling pathway	2/117	26/18866	0.0112454	0.0249743	0.0115445	AR/IGFBP3	2
BP	GO:0044068	modulation by symbiont of host cellular process	2/117	26/18866	0.0112454	0.0249743	0.0115445	BCL2L1/CASP8	2
BP	GO:0051123	RNA polymerase II preinitiation complex assembly	2/117	26/18866	0.0112454	0.0249743	0.0115445	ESR1/TP53	2
BP	GO:0060307	regulation of ventricular cardiac muscle cell membrane repolarization	2/117	26/18866	0.0112454	0.0249743	0.0115445	SCN5A/KCNH2	2
BP	GO:0060343	trabecula formation	2/117	26/18866	0.0112454	0.0249743	0.0115445	MMP2/COL1A1	2
BP	GO:0060740	prostate gland epithelium morphogenesis	2/117	26/18866	0.0112454	0.0249743	0.0115445	AR/ESR1	2
BP	GO:0090025	regulation of monocyte chemotaxis	2/117	26/18866	0.0112454	0.0249743	0.0115445	SERPINE1/CXCL10	2
BP	GO:0097066	response to thyroid hormone	2/117	26/18866	0.0112454	0.0249743	0.0115445	F7/AKR1B1	2
BP	GO:1905523	positive regulation of macrophage migration	2/117	26/18866	0.0112454	0.0249743	0.0115445	MAPK14/MAPK1	2
BP	GO:0007266	Rho protein signal transduction	4/117	140/18866	0.0112892	0.0250421	0.0115758	MET/RAF1/COL3A1/CHUK	4
BP	GO:0060048	cardiac muscle contraction	4/117	140/18866	0.0112892	0.0250421	0.0115758	SCN5A/KCNH2/CAV1/GJA1	4
BP	GO:0002479	antigen processing and presentation of exogenous peptide antigen via MHC class I, TAP-dependent	3/117	75/18866	0.0113539	0.0251264	0.0116148	NCF1/IKBKB/CHUK	3
BP	GO:0033143	regulation of intracellular steroid hormone receptor signaling pathway	3/117	75/18866	0.0113539	0.0251264	0.0116148	AR/ESR1/PARP1	3
BP	GO:0045685	regulation of glial cell differentiation	3/117	75/18866	0.0113539	0.0251264	0.0116148	PPARG/RELA/CDK1	3
BP	GO:0046323	glucose import	3/117	75/18866	0.0113539	0.0251264	0.0116148	MAPK14/AKT1/NFE2L2	3
BP	GO:0050792	regulation of viral process	5/117	217/18866	0.0113936	0.0251996	0.0116486	BCL2/JUN/STAT1/SLPI/CXCL8	5
BP	GO:0048880	sensory system development	7/117	394/18866	0.0114602	0.0253321	0.0117098	BCL2/JUN/CYP1A1/EGFR/VEGFA/CDK4/HIF1A	7
BP	GO:1903322	positive regulation of protein modification by small protein conjugation or removal	4/117	141/18866	0.0115645	0.0255475	0.0118094	ADRB2/XIAP/HSPA5/CAV1	4
BP	GO:0008306	associative learning	3/117	76/18866	0.011768	0.0259514	0.0119961	APP/HIF1A/FOS	3
BP	GO:0033555	multicellular organismal response to stress	3/117	76/18866	0.011768	0.0259514	0.0119961	DPP4/BCL2/GJA1	3
BP	GO:0060193	positive regulation of lipase activity	3/117	76/18866	0.011768	0.0259514	0.0119961	ESR1/SELE/EGFR	3
BP	GO:0072073	kidney epithelium development	4/117	142/18866	0.011844	0.0261038	0.0120666	BCL2/STAT1/VEGFA/MYC	4
BP	GO:0002026	regulation of the force of heart contraction	2/117	27/18866	0.0120962	0.0265049	0.012252	CAV1/NOS3	2
BP	GO:0009065	glutamine family amino acid catabolic process	2/117	27/18866	0.0120962	0.0265049	0.012252	NOS2/NOS3	2
BP	GO:0009651	response to salt stress	2/117	27/18866	0.0120962	0.0265049	0.012252	AKR1B1/TP53	2
BP	GO:0031954	positive regulation of protein autophosphorylation	2/117	27/18866	0.0120962	0.0265049	0.012252	VEGFA/VEGFC	2
BP	GO:0032607	interferon-alpha production	2/117	27/18866	0.0120962	0.0265049	0.012252	STAT1/CHUK	2
BP	GO:0048668	collateral sprouting	2/117	27/18866	0.0120962	0.0265049	0.012252	APP/SPP1	2
BP	GO:0060544	regulation of necroptotic process	2/117	27/18866	0.0120962	0.0265049	0.012252	CASP8/CAV1	2
BP	GO:0062098	regulation of programmed necrotic cell death	2/117	27/18866	0.0120962	0.0265049	0.012252	CASP8/CAV1	2
BP	GO:1901623	regulation of lymphocyte chemotaxis	2/117	27/18866	0.0120962	0.0265049	0.012252	CCL2/CXCL10	2
BP	GO:2000353	positive regulation of endothelial cell apoptotic process	2/117	27/18866	0.0120962	0.0265049	0.012252	CD40LG/CCL2	2
BP	GO:0014015	positive regulation of gliogenesis	3/117	77/18866	0.0121906	0.0266344	0.0123118	PPARG/RELA/IL1B	3
BP	GO:0030500	regulation of bone mineralization	3/117	77/18866	0.0121906	0.0266344	0.0123118	ALOX5/ADRB2/HIF1A	3
BP	GO:0060411	cardiac septum morphogenesis	3/117	77/18866	0.0121906	0.0266344	0.0123118	TP53/MDM2/NOS3	3
BP	GO:0061333	renal tubule morphogenesis	3/117	77/18866	0.0121906	0.0266344	0.0123118	BCL2/VEGFA/MYC	3
BP	GO:0070830	bicellular tight junction assembly	3/117	77/18866	0.0121906	0.0266344	0.0123118	IKBKB/GJA1/CLDN4	3
BP	GO:0042445	hormone metabolic process	5/117	221/18866	0.0122543	0.0267579	0.0123689	ESR1/AKR1B1/CYP1A1/HIF1A/SPP1	5
BP	GO:0002218	activation of innate immune response	4/117	144/18866	0.012416	0.0270797	0.0125177	RELA/IKBKB/RAF1/CHUK	4
BP	GO:0002700	regulation of production of molecular mediator of immune response	4/117	144/18866	0.012416	0.0270797	0.0125177	HMOX1/IL4/CD40LG/IL1B	4
BP	GO:0017157	regulation of exocytosis	5/117	222/18866	0.0124762	0.0271951	0.012571	GSK3B/HMOX1/IFNG/IL4/PRKCB	5
BP	GO:0030433	ubiquitin-dependent ERAD pathway	3/117	78/18866	0.012622	0.0274812	0.0127033	HSPA5/CAV1/NFE2L2	3
BP	GO:0060395	SMAD protein signal transduction	3/117	78/18866	0.012622	0.0274812	0.0127033	JUN/FOS/PARP1	3
BP	GO:0002699	positive regulation of immune effector process	5/117	223/18866	0.0127008	0.0276368	0.0127752	NOS2/HMOX1/IFNG/IL4/IL1B	5
BP	GO:0071322	cellular response to carbohydrate stimulus	4/117	145/18866	0.0127085	0.0276378	0.0127756	ICAM1/HIF1A/RAF1/PRKCB	4
BP	GO:0002360	T cell lineage commitment	2/117	28/18866	0.0129744	0.027958	0.0129237	BCL2/TP53	2
BP	GO:0003180	aortic valve morphogenesis	2/117	28/18866	0.0129744	0.027958	0.0129237	RB1/NOS3	2
BP	GO:0010818	T cell chemotaxis	2/117	28/18866	0.0129744	0.027958	0.0129237	CXCL11/CXCL10	2
BP	GO:0022011	myelination in peripheral nervous system	2/117	28/18866	0.0129744	0.027958	0.0129237	AKT1/SOD1	2
BP	GO:0032292	peripheral nervous system axon ensheathment	2/117	28/18866	0.0129744	0.027958	0.0129237	AKT1/SOD1	2
BP	GO:0033561	regulation of water loss via skin	2/117	28/18866	0.0129744	0.027958	0.0129237	MET/CLDN4	2
BP	GO:0060143	positive regulation of syncytium formation by plasma membrane fusion	2/117	28/18866	0.0129744	0.027958	0.0129237	MAPK14/IL4	2
BP	GO:0060512	prostate gland morphogenesis	2/117	28/18866	0.0129744	0.027958	0.0129237	AR/ESR1	2
BP	GO:0071168	protein localization to chromatin	2/117	28/18866	0.0129744	0.027958	0.0129237	ESR1/RB1	2
BP	GO:0072376	protein activation cascade	2/117	28/18866	0.0129744	0.027958	0.0129237	F7/F3	2
BP	GO:0072378	blood coagulation, fibrin clot formation	2/117	28/18866	0.0129744	0.027958	0.0129237	F7/F3	2
BP	GO:0090200	positive regulation of release of cytochrome c from mitochondria	2/117	28/18866	0.0129744	0.027958	0.0129237	MMP9/TP53	2
BP	GO:1902932	positive regulation of alcohol biosynthetic process	2/117	28/18866	0.0129744	0.027958	0.0129237	IFNG/IL1B	2
BP	GO:1903579	negative regulation of ATP metabolic process	2/117	28/18866	0.0129744	0.027958	0.0129237	TP53/PARP1	2
BP	GO:1905563	negative regulation of vascular endothelial cell proliferation	2/117	28/18866	0.0129744	0.027958	0.0129237	PPARG/CCL2	2
BP	GO:2000191	regulation of fatty acid transport	2/117	28/18866	0.0129744	0.027958	0.0129237	AKT1/IL1B	2
BP	GO:0016575	histone deacetylation	3/117	79/18866	0.013062	0.0280505	0.0129664	MAPK8/VEGFA/TP53	3
BP	GO:0030104	water homeostasis	3/117	79/18866	0.013062	0.0280505	0.0129664	AKR1B1/MET/CLDN4	3
BP	GO:0043407	negative regulation of MAP kinase activity	3/117	79/18866	0.013062	0.0280505	0.0129664	GSTP1/CAV1/IL1B	3
BP	GO:0050672	negative regulation of lymphocyte proliferation	3/117	79/18866	0.013062	0.0280505	0.0129664	CASP3/ERBB2/IL2RA	3
BP	GO:0090398	cellular senescence	3/117	79/18866	0.013062	0.0280505	0.0129664	MAPK14/CDKN1A/TP53	3
BP	GO:0120192	tight junction assembly	3/117	79/18866	0.013062	0.0280505	0.0129664	IKBKB/GJA1/CLDN4	3
BP	GO:0007189	adenylate cyclase-activating G protein-coupled receptor signaling pathway	4/117	147/18866	0.0133067	0.0285599	0.0132019	ADRB2/PTGER3/CXCL11/CXCL10	4
BP	GO:0003151	outflow tract morphogenesis	3/117	80/18866	0.0135106	0.0289152	0.0133662	JUN/VEGFA/HIF1A	3
BP	GO:0006110	regulation of glycolytic process	3/117	80/18866	0.0135106	0.0289152	0.0133662	APP/IFNG/HIF1A	3
BP	GO:0032204	regulation of telomere maintenance	3/117	80/18866	0.0135106	0.0289152	0.0133662	MAPK1/MYC/PARP1	3
BP	GO:0032945	negative regulation of mononuclear cell proliferation	3/117	80/18866	0.0135106	0.0289152	0.0133662	CASP3/ERBB2/IL2RA	3
BP	GO:0042590	antigen processing and presentation of exogenous peptide antigen via MHC class I	3/117	80/18866	0.0135106	0.0289152	0.0133662	NCF1/IKBKB/CHUK	3
BP	GO:0061337	cardiac conduction	4/117	148/18866	0.0136125	0.0291166	0.0134593	SCN5A/KCNH2/CAV1/GJA1	4
BP	GO:0001958	endochondral ossification	2/117	29/18866	0.0138795	0.0295371	0.0136536	COL1A1/RUNX2	2
BP	GO:0002230	positive regulation of defense response to virus by host	2/117	29/18866	0.0138795	0.0295371	0.0136536	STAT1/IL4	2
BP	GO:0008209	androgen metabolic process	2/117	29/18866	0.0138795	0.0295371	0.0136536	ESR1/SPP1	2
BP	GO:0019048	modulation by virus of host process	2/117	29/18866	0.0138795	0.0295371	0.0136536	BCL2L1/CASP8	2
BP	GO:0036075	replacement ossification	2/117	29/18866	0.0138795	0.0295371	0.0136536	COL1A1/RUNX2	2
BP	GO:0048873	homeostasis of number of cells within a tissue	2/117	29/18866	0.0138795	0.0295371	0.0136536	BCL2/NOS3	2
BP	GO:0050901	leukocyte tethering or rolling	2/117	29/18866	0.0138795	0.0295371	0.0136536	SELE/VCAM1	2
BP	GO:0071624	positive regulation of granulocyte chemotaxis	2/117	29/18866	0.0138795	0.0295371	0.0136536	IL4/CXCL8	2
BP	GO:0150117	positive regulation of cell-substrate junction organization	2/117	29/18866	0.0138795	0.0295371	0.0136536	KDR/VEGFA	2
BP	GO:0001960	negative regulation of cytokine-mediated signaling pathway	3/117	81/18866	0.013968	0.0296919	0.0137252	PPARG/GSTP1/CAV1	3
BP	GO:0050829	defense response to Gram-negative bacterium	3/117	81/18866	0.013968	0.0296919	0.0137252	NOS2/IL6R/SERPINE1	3
BP	GO:0120193	tight junction organization	3/117	82/18866	0.0144342	0.0306482	0.0141672	IKBKB/GJA1/CLDN4	3
BP	GO:1902930	regulation of alcohol biosynthetic process	3/117	82/18866	0.0144342	0.0306482	0.0141672	IFNG/SOD1/IL1B	3
BP	GO:0016331	morphogenesis of embryonic epithelium	4/117	151/18866	0.0145564	0.0308903	0.0142791	AR/CASP3/HIF1A/VEGFC	4
BP	GO:0048738	cardiac muscle tissue development	5/117	231/18866	0.0145969	0.0309589	0.0143109	MAPK14/CDK1/VEGFA/MAPK1/GJA1	5
BP	GO:0010758	regulation of macrophage chemotaxis	2/117	30/18866	0.0148113	0.0312904	0.0144641	MAPK14/MAPK1	2
BP	GO:0044030	regulation of DNA methylation	2/117	30/18866	0.0148113	0.0312904	0.0144641	MYC/PARP1	2
BP	GO:0070168	negative regulation of biomineral tissue development	2/117	30/18866	0.0148113	0.0312904	0.0144641	HIF1A/NOS3	2
BP	GO:0099625	ventricular cardiac muscle cell membrane repolarization	2/117	30/18866	0.0148113	0.0312904	0.0144641	SCN5A/KCNH2	2
BP	GO:0110150	negative regulation of biomineralization	2/117	30/18866	0.0148113	0.0312904	0.0144641	HIF1A/NOS3	2
BP	GO:1900027	regulation of ruffle assembly	2/117	30/18866	0.0148113	0.0312904	0.0144641	ICAM1/CAV1	2
BP	GO:1903205	regulation of hydrogen peroxide-induced cell death	2/117	30/18866	0.0148113	0.0312904	0.0144641	MET/NFE2L2	2
BP	GO:0019882	antigen processing and presentation	5/117	232/18866	0.0148466	0.0313474	0.0144904	NCF1/IKBKB/ICAM1/CHUK/CTSD	5
BP	GO:0001837	epithelial to mesenchymal transition	4/117	152/18866	0.01488	0.0314003	0.0145149	GSK3B/HIF1A/IL1B/COL1A1	4
BP	GO:0001570	vasculogenesis	3/117	83/18866	0.014909	0.0314089	0.0145189	KDR/VEGFA/CAV1	3
BP	GO:0048041	focal adhesion assembly	3/117	83/18866	0.014909	0.0314089	0.0145189	KDR/BCL2/VEGFA	3
BP	GO:2001021	negative regulation of response to DNA damage stimulus	3/117	83/18866	0.014909	0.0314089	0.0145189	BCL2/BCL2L1/MDM2	3
BP	GO:0008203	cholesterol metabolic process	4/117	153/18866	0.0152081	0.0320032	0.0147936	APP/IL4/SOD1/PON1	4
BP	GO:0030048	actin filament-based movement	4/117	153/18866	0.0152081	0.0320032	0.0147936	SCN5A/KCNH2/CAV1/GJA1	4
BP	GO:0014031	mesenchymal cell development	3/117	84/18866	0.0153927	0.0323375	0.0149481	BCL2/MAPK1/HIF1A	3
BP	GO:0030279	negative regulation of ossification	3/117	84/18866	0.0153927	0.0323375	0.0149481	BCL2/HIF1A/VEGFC	3
BP	GO:0050886	endocrine process	3/117	84/18866	0.0153927	0.0323375	0.0149481	GJA1/IL1B/NOS3	3
BP	GO:0051250	negative regulation of lymphocyte activation	4/117	154/18866	0.0155408	0.0326305	0.0150835	CASP3/ERBB2/IL2RA/IL4	4
BP	GO:0010644	cell communication by electrical coupling	2/117	31/18866	0.0157693	0.0328904	0.0152037	CAV1/GJA1	2
BP	GO:0014044	Schwann cell development	2/117	31/18866	0.0157693	0.0328904	0.0152037	AKT1/SOD1	2
BP	GO:0014072	response to isoquinoline alkaloid	2/117	31/18866	0.0157693	0.0328904	0.0152037	RELA/MDM2	2
BP	GO:0043278	response to morphine	2/117	31/18866	0.0157693	0.0328904	0.0152037	RELA/MDM2	2
BP	GO:0045940	positive regulation of steroid metabolic process	2/117	31/18866	0.0157693	0.0328904	0.0152037	IFNG/IL1B	2
BP	GO:0060261	positive regulation of transcription initiation from RNA polymerase II promoter	2/117	31/18866	0.0157693	0.0328904	0.0152037	ESR1/TP53	2
BP	GO:0060325	face morphogenesis	2/117	31/18866	0.0157693	0.0328904	0.0152037	MMP2/COL1A1	2
BP	GO:0086011	membrane repolarization during action potential	2/117	31/18866	0.0157693	0.0328904	0.0152037	KCNH2/CAV1	2
BP	GO:0099623	regulation of cardiac muscle cell membrane repolarization	2/117	31/18866	0.0157693	0.0328904	0.0152037	SCN5A/KCNH2	2
BP	GO:1902230	negative regulation of intrinsic apoptotic signaling pathway in response to DNA damage	2/117	31/18866	0.0157693	0.0328904	0.0152037	BCL2/BCL2L1	2
BP	GO:1904292	regulation of ERAD pathway	2/117	31/18866	0.0157693	0.0328904	0.0152037	CAV1/NFE2L2	2
BP	GO:2000406	positive regulation of T cell migration	2/117	31/18866	0.0157693	0.0328904	0.0152037	APP/CXCL10	2
BP	GO:0050851	antigen receptor-mediated signaling pathway	6/117	325/18866	0.0158541	0.0330407	0.0152732	RELA/IKBKB/BCL2/MAPK1/PRKCB/CHUK	6
BP	GO:0060560	developmental growth involved in morphogenesis	5/117	236/18866	0.0158738	0.0330407	0.0152732	ESR1/GSK3B/VEGFA/APP/SPP1	5
BP	GO:0034502	protein localization to chromosome	3/117	85/18866	0.0158851	0.0330407	0.0152732	ESR1/CDK1/RB1	3
BP	GO:0043297	apical junction assembly	3/117	85/18866	0.0158851	0.0330407	0.0152732	IKBKB/GJA1/CLDN4	3
BP	GO:0110110	positive regulation of animal organ morphogenesis	3/117	85/18866	0.0158851	0.0330407	0.0152732	AR/VEGFA/MYC	3
BP	GO:0008360	regulation of cell shape	4/117	156/18866	0.0162198	0.0337183	0.0155864	KDR/ICAM1/VEGFA/CCL2	4
BP	GO:0035023	regulation of Rho protein signal transduction	3/117	86/18866	0.0163864	0.0340458	0.0157378	MET/RAF1/COL3A1	3
BP	GO:0003176	aortic valve development	2/117	32/18866	0.0167531	0.0345791	0.0159843	RB1/NOS3	2
BP	GO:0010743	regulation of macrophage derived foam cell differentiation	2/117	32/18866	0.0167531	0.0345791	0.0159843	PPARG/NFKBIA	2
BP	GO:0034694	response to prostaglandin	2/117	32/18866	0.0167531	0.0345791	0.0159843	PPARG/AKT1	2
BP	GO:0043304	regulation of mast cell degranulation	2/117	32/18866	0.0167531	0.0345791	0.0159843	HMOX1/IL4	2
BP	GO:0044818	mitotic G2/M transition checkpoint	2/117	32/18866	0.0167531	0.0345791	0.0159843	CDK1/CDKN1A	2
BP	GO:0045589	regulation of regulatory T cell differentiation	2/117	32/18866	0.0167531	0.0345791	0.0159843	IL2RA/IFNG	2
BP	GO:0046320	regulation of fatty acid oxidation	2/117	32/18866	0.0167531	0.0345791	0.0159843	PPARG/AKT1	2
BP	GO:0061036	positive regulation of cartilage development	2/117	32/18866	0.0167531	0.0345791	0.0159843	RELA/RUNX2	2
BP	GO:0071353	cellular response to interleukin-4	2/117	32/18866	0.0167531	0.0345791	0.0159843	CDK4/HSPA5	2
BP	GO:0086019	cell-cell signaling involved in cardiac conduction	2/117	32/18866	0.0167531	0.0345791	0.0159843	SCN5A/GJA1	2
BP	GO:1901889	negative regulation of cell junction assembly	2/117	32/18866	0.0167531	0.0345791	0.0159843	IKBKB/IL1B	2
BP	GO:1903959	regulation of anion transmembrane transport	2/117	32/18866	0.0167531	0.0345791	0.0159843	AKT1/ABCB1	2
BP	GO:0001942	hair follicle development	3/117	87/18866	0.0168964	0.0347987	0.0160858	RELA/BCL2/EGFR	3
BP	GO:0030512	negative regulation of transforming growth factor beta receptor signaling pathway	3/117	87/18866	0.0168964	0.0347987	0.0160858	TP53/HSPA5/CAV1	3
BP	GO:0060291	long-term synaptic potentiation	3/117	87/18866	0.0168964	0.0347987	0.0160858	GSK3B/MAPK1/APP	3
BP	GO:0060761	negative regulation of response to cytokine stimulus	3/117	87/18866	0.0168964	0.0347987	0.0160858	PPARG/GSTP1/CAV1	3
BP	GO:0035051	cardiocyte differentiation	4/117	158/18866	0.0169173	0.0348036	0.0160881	CDK1/EGFR/VEGFA/MAPK1	4
BP	GO:0060402	calcium ion transport into cytosol	4/117	158/18866	0.0169173	0.0348036	0.0160881	BCL2/CAV1/CXCL11/CXCL10	4
BP	GO:0055067	monovalent inorganic cation homeostasis	4/117	159/18866	0.0172729	0.035516	0.0164174	BCL2/KCNH2/MAPK1/CA2	4
BP	GO:0043010	camera-type eye development	6/117	332/18866	0.0174231	0.0358051	0.016551	JUN/CYP1A1/EGFR/VEGFA/CDK4/HIF1A	6
BP	GO:0001975	response to amphetamine	2/117	33/18866	0.0177625	0.0362656	0.0167639	ICAM1/SOD1	2
BP	GO:0002691	regulation of cellular extravasation	2/117	33/18866	0.0177625	0.0362656	0.0167639	ICAM1/SELE	2
BP	GO:0033006	regulation of mast cell activation involved in immune response	2/117	33/18866	0.0177625	0.0362656	0.0167639	HMOX1/IL4	2
BP	GO:0040018	positive regulation of multicellular organism growth	2/117	33/18866	0.0177625	0.0362656	0.0167639	BCL2/IGF2	2
BP	GO:0045736	negative regulation of cyclin-dependent protein serine/threonine kinase activity	2/117	33/18866	0.0177625	0.0362656	0.0167639	CASP3/CDKN1A	2
BP	GO:0045879	negative regulation of smoothened signaling pathway	2/117	33/18866	0.0177625	0.0362656	0.0167639	RB1/RUNX2	2
BP	GO:0048011	neurotrophin TRK receptor signaling pathway	2/117	33/18866	0.0177625	0.0362656	0.0167639	CASP3/RAF1	2
BP	GO:0090022	regulation of neutrophil chemotaxis	2/117	33/18866	0.0177625	0.0362656	0.0167639	DPP4/CXCL8	2
BP	GO:0120255	olefinic compound biosynthetic process	2/117	33/18866	0.0177625	0.0362656	0.0167639	ALOX5/GSTP1	2
BP	GO:1901380	negative regulation of potassium ion transmembrane transport	2/117	33/18866	0.0177625	0.0362656	0.0167639	KCNH2/CAV1	2
BP	GO:1901797	negative regulation of signal transduction by p53 class mediator	2/117	33/18866	0.0177625	0.0362656	0.0167639	BCL2/MDM2	2
BP	GO:1905048	regulation of metallopeptidase activity	2/117	33/18866	0.0177625	0.0362656	0.0167639	MAPK14/CLDN4	2
BP	GO:0022404	molting cycle process	3/117	89/18866	0.0179431	0.0365748	0.0169068	RELA/BCL2/EGFR	3
BP	GO:0022405	hair cycle process	3/117	89/18866	0.0179431	0.0365748	0.0169068	RELA/BCL2/EGFR	3
BP	GO:1903845	negative regulation of cellular response to transforming growth factor beta stimulus	3/117	89/18866	0.0179431	0.0365748	0.0169068	TP53/HSPA5/CAV1	3
BP	GO:0010970	transport along microtubule	4/117	161/18866	0.0179982	0.0366674	0.0169496	APP/HIF1A/SOD1/HSPB1	4
BP	GO:1902652	secondary alcohol metabolic process	4/117	162/18866	0.0183679	0.0373801	0.0172791	APP/IL4/SOD1/PON1	4
BP	GO:1903305	regulation of regulated secretory pathway	4/117	162/18866	0.0183679	0.0373801	0.0172791	GSK3B/HMOX1/IL4/PRKCB	4
BP	GO:0098773	skin epidermis development	3/117	90/18866	0.0184797	0.0375873	0.0173749	RELA/BCL2/EGFR	3
BP	GO:0007202	activation of phospholipase C activity	2/117	34/18866	0.0187971	0.0380483	0.0175879	SELE/EGFR	2
BP	GO:0010765	positive regulation of sodium ion transport	2/117	34/18866	0.0187971	0.0380483	0.0175879	SCN5A/AKT1	2
BP	GO:0036474	cell death in response to hydrogen peroxide	2/117	34/18866	0.0187971	0.0380483	0.0175879	MET/NFE2L2	2
BP	GO:0043516	regulation of DNA damage response, signal transduction by p53 class mediator	2/117	34/18866	0.0187971	0.0380483	0.0175879	TP53/MDM2	2
BP	GO:0050715	positive regulation of cytokine secretion	2/117	34/18866	0.0187971	0.0380483	0.0175879	IFNG/IL1A	2
BP	GO:0055094	response to lipoprotein particle	2/117	34/18866	0.0187971	0.0380483	0.0175879	PPARG/AKT1	2
BP	GO:0070102	interleukin-6-mediated signaling pathway	2/117	34/18866	0.0187971	0.0380483	0.0175879	STAT1/IL6R	2
BP	GO:0070232	regulation of T cell apoptotic process	2/117	34/18866	0.0187971	0.0380483	0.0175879	TP53/HIF1A	2
BP	GO:1904030	negative regulation of cyclin-dependent protein kinase activity	2/117	34/18866	0.0187971	0.0380483	0.0175879	CASP3/CDKN1A	2
BP	GO:0097306	cellular response to alcohol	3/117	91/18866	0.0190251	0.0384685	0.0177822	PPARG/AKT1/CDK4	3
BP	GO:1904063	negative regulation of cation transmembrane transport	3/117	91/18866	0.0190251	0.0384685	0.0177822	KCNH2/MMP9/CAV1	3
BP	GO:0046165	alcohol biosynthetic process	4/117	164/18866	0.0191213	0.0386423	0.0178625	AKR1B1/IFNG/SOD1/IL1B	4
BP	GO:0006520	cellular amino acid metabolic process	6/117	340/18866	0.0193437	0.0390708	0.0180606	NOS2/TYR/DPEP1/ODC1/NOS3/NQO1	6
BP	GO:0031058	positive regulation of histone modification	3/117	92/18866	0.0195795	0.0395046	0.0182612	VEGFA/TP53/IL1B	3
BP	GO:1903321	negative regulation of protein modification by small protein conjugation or removal	3/117	92/18866	0.0195795	0.0395046	0.0182612	RELA/AKT1/CAV1	3
BP	GO:0003203	endocardial cushion morphogenesis	2/117	35/18866	0.0198566	0.0399142	0.0184505	MDM2/NOS3	2
BP	GO:0006471	protein ADP-ribosylation	2/117	35/18866	0.0198566	0.0399142	0.0184505	IFNG/PARP1	2
BP	GO:0006691	leukotriene metabolic process	2/117	35/18866	0.0198566	0.0399142	0.0184505	ALOX5/DPEP1	2
BP	GO:0045066	regulatory T cell differentiation	2/117	35/18866	0.0198566	0.0399142	0.0184505	IL2RA/IFNG	2
BP	GO:0060674	placenta blood vessel development	2/117	35/18866	0.0198566	0.0399142	0.0184505	AKT1/MAPK1	2
BP	GO:0070670	response to interleukin-4	2/117	35/18866	0.0198566	0.0399142	0.0184505	CDK4/HSPA5	2
BP	GO:0110111	negative regulation of animal organ morphogenesis	2/117	35/18866	0.0198566	0.0399142	0.0184505	BCL2/STAT1	2
BP	GO:0006163	purine nucleotide metabolic process	7/117	442/18866	0.0202763	0.0407362	0.0188304	NOS2/APP/IFNG/IL4/HIF1A/NOS3/PARP1	7
BP	GO:0030641	regulation of cellular pH	3/117	94/18866	0.0207148	0.041595	0.0192274	BCL2/MAPK1/CA2	3
BP	GO:0001569	branching involved in blood vessel morphogenesis	2/117	36/18866	0.0209405	0.0418699	0.0193545	KDR/VEGFA	2
BP	GO:0003382	epithelial cell morphogenesis	2/117	36/18866	0.0209405	0.0418699	0.0193545	AR/MET	2
BP	GO:0010543	regulation of platelet activation	2/117	36/18866	0.0209405	0.0418699	0.0193545	NOS3/THBD	2
BP	GO:0031572	G2 DNA damage checkpoint	2/117	36/18866	0.0209405	0.0418699	0.0193545	CDK1/CDKN1A	2
BP	GO:0051973	positive regulation of telomerase activity	2/117	36/18866	0.0209405	0.0418699	0.0193545	MAPK1/MYC	2
BP	GO:0060323	head morphogenesis	2/117	36/18866	0.0209405	0.0418699	0.0193545	MMP2/COL1A1	2
BP	GO:0071402	cellular response to lipoprotein particle stimulus	2/117	36/18866	0.0209405	0.0418699	0.0193545	PPARG/AKT1	2
BP	GO:0071634	regulation of transforming growth factor beta production	2/117	36/18866	0.0209405	0.0418699	0.0193545	PTGS2/HIF1A	2
BP	GO:0090092	regulation of transmembrane receptor protein serine/threonine kinase signaling pathway	5/117	254/18866	0.0210832	0.0421201	0.0194702	TP53/XIAP/HSPA5/CAV1/PARP1	5
BP	GO:0016125	sterol metabolic process	4/117	169/18866	0.021088	0.0421201	0.0194702	APP/IL4/SOD1/PON1	4
BP	GO:0045638	negative regulation of myeloid cell differentiation	3/117	95/18866	0.0212957	0.0425126	0.0196516	NFKBIA/IL4/MYC	3
BP	GO:2000241	regulation of reproductive process	4/117	170/18866	0.0214956	0.0428889	0.0198256	AR/ESR1/VEGFA/GJA1	4
BP	GO:0045730	respiratory burst	2/117	37/18866	0.0220486	0.043853	0.0202712	NCF1/MPO	2
BP	GO:0060260	regulation of transcription initiation from RNA polymerase II promoter	2/117	37/18866	0.0220486	0.043853	0.0202712	ESR1/TP53	2
BP	GO:0070897	transcription preinitiation complex assembly	2/117	37/18866	0.0220486	0.043853	0.0202712	ESR1/TP53	2
BP	GO:0086010	membrane depolarization during action potential	2/117	37/18866	0.0220486	0.043853	0.0202712	SCN5A/KCNH2	2
BP	GO:0097242	amyloid-beta clearance	2/117	37/18866	0.0220486	0.043853	0.0202712	IFNG/IL4	2
BP	GO:1905314	semi-lunar valve development	2/117	37/18866	0.0220486	0.043853	0.0202712	RB1/NOS3	2
BP	GO:0001906	cell killing	4/117	172/18866	0.0223255	0.0443335	0.0204933	NOS2/ICAM1/IFNG/IL4	4
BP	GO:0002244	hematopoietic progenitor cell differentiation	4/117	172/18866	0.0223255	0.0443335	0.0204933	KDR/BCL2/TP53/NFE2L2	4
BP	GO:0015698	inorganic anion transport	4/117	172/18866	0.0223255	0.0443335	0.0204933	GABRA1/CA2/ABCB1/CLDN4	4
BP	GO:1901617	organic hydroxy compound biosynthetic process	5/117	258/18866	0.0223757	0.0444099	0.0205286	AKR1B1/TYR/IFNG/SOD1/IL1B	5
BP	GO:0001657	ureteric bud development	3/117	98/18866	0.023092	0.0457353	0.0211413	BCL2/VEGFA/MYC	3
BP	GO:0044728	DNA methylation or demethylation	3/117	98/18866	0.023092	0.0457353	0.0211413	FOS/MYC/PARP1	3
BP	GO:0045833	negative regulation of lipid metabolic process	3/117	98/18866	0.023092	0.0457353	0.0211413	AKT1/SOD1/IL1B	3
BP	GO:0050810	regulation of steroid biosynthetic process	3/117	98/18866	0.023092	0.0457353	0.0211413	IFNG/SOD1/IL1B	3
BP	GO:0015718	monocarboxylic acid transport	4/117	174/18866	0.0231746	0.0457424	0.0211446	NOS2/PPARG/AKT1/IL1B	4
BP	GO:0002385	mucosal immune response	2/117	38/18866	0.0231805	0.0457424	0.0211446	NOS2/IL4	2
BP	GO:0032733	positive regulation of interleukin-10 production	2/117	38/18866	0.0231805	0.0457424	0.0211446	IL4/CD40LG	2
BP	GO:0044003	modulation by symbiont of host process	2/117	38/18866	0.0231805	0.0457424	0.0211446	BCL2L1/CASP8	2
BP	GO:0071604	transforming growth factor beta production	2/117	38/18866	0.0231805	0.0457424	0.0211446	PTGS2/HIF1A	2
BP	GO:1905898	positive regulation of response to endoplasmic reticulum stress	2/117	38/18866	0.0231805	0.0457424	0.0211446	CAV1/NFE2L2	2
BP	GO:2000403	positive regulation of lymphocyte migration	2/117	38/18866	0.0231805	0.0457424	0.0211446	APP/CXCL10	2
BP	GO:0010921	regulation of phosphatase activity	4/117	175/18866	0.0236065	0.0465587	0.0215219	GSK3B/IKBKB/IFNG/IGFBP3	4
BP	GO:0002474	antigen processing and presentation of peptide antigen via MHC class I	3/117	99/18866	0.0237086	0.0465894	0.0215361	NCF1/IKBKB/CHUK	3
BP	GO:0007044	cell-substrate junction assembly	3/117	99/18866	0.0237086	0.0465894	0.0215361	KDR/BCL2/VEGFA	3
BP	GO:0051817	modulation of process of other organism involved in symbiotic interaction	3/117	99/18866	0.0237086	0.0465894	0.0215361	JUN/BCL2L1/CASP8	3
BP	GO:0062207	regulation of pattern recognition receptor signaling pathway	3/117	99/18866	0.0237086	0.0465894	0.0215361	ESR1/XIAP/CAV1	3
BP	GO:0072163	mesonephric epithelium development	3/117	99/18866	0.0237086	0.0465894	0.0215361	BCL2/VEGFA/MYC	3
BP	GO:0072164	mesonephric tubule development	3/117	99/18866	0.0237086	0.0465894	0.0215361	BCL2/VEGFA/MYC	3
BP	GO:0090277	positive regulation of peptide hormone secretion	3/117	99/18866	0.0237086	0.0465894	0.0215361	EGFR/HIF1A/GJA1	3
BP	GO:0007187	G protein-coupled receptor signaling pathway, coupled to cyclic nucleotide second messenger	5/117	263/18866	0.0240625	0.0472602	0.0218462	ADRB2/CCL2/PTGER3/CXCL11/CXCL10	5
BP	GO:0036503	ERAD pathway	3/117	100/18866	0.024334	0.0475742	0.0219914	HSPA5/CAV1/NFE2L2	3
BP	GO:0045069	regulation of viral genome replication	3/117	100/18866	0.024334	0.0475742	0.0219914	BCL2/SLPI/CXCL8	3
BP	GO:0006778	porphyrin-containing compound metabolic process	2/117	39/18866	0.0243359	0.0475742	0.0219914	HMOX1/CYP1A1	2
BP	GO:0007190	activation of adenylate cyclase activity	2/117	39/18866	0.0243359	0.0475742	0.0219914	ADRB2/RAF1	2
BP	GO:0035886	vascular associated smooth muscle cell differentiation	2/117	39/18866	0.0243359	0.0475742	0.0219914	VEGFA/SOD2	2
BP	GO:0038179	neurotrophin signaling pathway	2/117	39/18866	0.0243359	0.0475742	0.0219914	CASP3/RAF1	2
BP	GO:0046329	negative regulation of JNK cascade	2/117	39/18866	0.0243359	0.0475742	0.0219914	AKT1/GSTP1	2
BP	GO:0060416	response to growth hormone	2/117	39/18866	0.0243359	0.0475742	0.0219914	F7/AKT1	2
BP	GO:1902229	regulation of intrinsic apoptotic signaling pathway in response to DNA damage	2/117	39/18866	0.0243359	0.0475742	0.0219914	BCL2/BCL2L1	2
BP	GO:0002478	antigen processing and presentation of exogenous peptide antigen	4/117	177/18866	0.0244849	0.0478407	0.0221145	NCF1/IKBKB/CHUK/CTSD	4
BP	GO:0060401	cytosolic calcium ion transport	4/117	178/18866	0.0249314	0.048688	0.0225062	BCL2/CAV1/CXCL11/CXCL10	4
BP	GO:0044264	cellular polysaccharide metabolic process	3/117	101/18866	0.0249683	0.0487095	0.0225162	GSK3B/AKT1/IGF2	3
BP	GO:0060191	regulation of lipase activity	3/117	101/18866	0.0249683	0.0487095	0.0225162	ESR1/SELE/EGFR	3
BP	GO:0010939	regulation of necrotic cell death	2/117	40/18866	0.0255145	0.0496979	0.022973	CASP8/CAV1	2
BP	GO:0030501	positive regulation of bone mineralization	2/117	40/18866	0.0255145	0.0496979	0.022973	ALOX5/ADRB2	2
BP	GO:0051281	positive regulation of release of sequestered calcium ion into cytosol	2/117	40/18866	0.0255145	0.0496979	0.022973	CXCL11/CXCL10	2
BP	GO:0043502	regulation of muscle adaptation	3/117	102/18866	0.0256115	0.0498354	0.0230366	SCN5A/NOS3/PARP1	3
BP	GO:0150115	cell-substrate junction organization	3/117	102/18866	0.0256115	0.0498354	0.0230366	KDR/BCL2/VEGFA	3
BP	GO:0090596	sensory organ morphogenesis	5/117	269/18866	0.0261925	0.0509396	0.023547	BCL2/VEGFA/MAPK1/HIF1A/SOD1	5
BP	GO:0001823	mesonephros development	3/117	103/18866	0.0262636	0.0509728	0.0235623	BCL2/VEGFA/MYC	3
BP	GO:0006885	regulation of pH	3/117	103/18866	0.0262636	0.0509728	0.0235623	BCL2/MAPK1/CA2	3
BP	GO:0048709	oligodendrocyte differentiation	3/117	103/18866	0.0262636	0.0509728	0.0235623	PPARG/GSTP1/ERBB2	3
BP	GO:1901890	positive regulation of cell junction assembly	3/117	103/18866	0.0262636	0.0509728	0.0235623	KDR/VEGFA/CAV1	3
BP	GO:0010256	endomembrane system organization	7/117	468/18866	0.0266459	0.0516881	0.023893	AR/AKT1/CDK1/MAPK1/SOD1/CAV1/PRKCB	7
BP	GO:0099622	cardiac muscle cell membrane repolarization	2/117	41/18866	0.0267159	0.051744	0.0239189	SCN5A/KCNH2	2
BP	GO:1900117	regulation of execution phase of apoptosis	2/117	41/18866	0.0267159	0.051744	0.0239189	BCL2L1/TP53	2
BP	GO:2000008	regulation of protein localization to cell surface	2/117	41/18866	0.0267159	0.051744	0.0239189	AKT1/EGF	2
BP	GO:0002367	cytokine production involved in immune response	3/117	104/18866	0.0269246	0.0520489	0.0240598	HMOX1/IL4/IL1B	3
BP	GO:0002456	T cell mediated immunity	3/117	104/18866	0.0269246	0.0520489	0.0240598	ICAM1/IL4/IL1B	3
BP	GO:0048525	negative regulation of viral process	3/117	104/18866	0.0269246	0.0520489	0.0240598	JUN/STAT1/SLPI	3
BP	GO:0030258	lipid modification	5/117	271/18866	0.0269285	0.0520489	0.0240598	PPARG/MAPK14/AKT1/CYP1A1/ALOX5	5
BP	GO:0021549	cerebellum development	3/117	105/18866	0.0275944	0.0532541	0.0246169	SCN5A/TP53/HSPA5	3
BP	GO:1902106	negative regulation of leukocyte differentiation	3/117	105/18866	0.0275944	0.0532541	0.0246169	ERBB2/IL4/MYC	3
BP	GO:2001022	positive regulation of response to DNA damage stimulus	3/117	105/18866	0.0275944	0.0532541	0.0246169	EGFR/MYC/PARP1	3
BP	GO:0006611	protein export from nucleus	4/117	184/18866	0.0277141	0.0534578	0.024711	GSK3B/TP53/MDM2/IL1B	4
BP	GO:0072521	purine-containing compound metabolic process	7/117	472/18866	0.0277347	0.0534701	0.0247167	NOS2/APP/IFNG/IL4/HIF1A/NOS3/PARP1	7
BP	GO:0006509	membrane protein ectodomain proteolysis	2/117	42/18866	0.0279398	0.0537008	0.0248234	IFNG/IL1B	2
BP	GO:0009268	response to pH	2/117	42/18866	0.0279398	0.0537008	0.0248234	CA2/GJA1	2
BP	GO:0010907	positive regulation of glucose metabolic process	2/117	42/18866	0.0279398	0.0537008	0.0248234	AKT1/IGF2	2
BP	GO:0090279	regulation of calcium ion import	2/117	42/18866	0.0279398	0.0537008	0.0248234	EGF/CCL2	2
BP	GO:1902622	regulation of neutrophil migration	2/117	42/18866	0.0279398	0.0537008	0.0248234	DPP4/CXCL8	2
BP	GO:1904037	positive regulation of epithelial cell apoptotic process	2/117	42/18866	0.0279398	0.0537008	0.0248234	CD40LG/CCL2	2
BP	GO:0019884	antigen processing and presentation of exogenous antigen	4/117	185/18866	0.0281952	0.0541481	0.0250302	NCF1/IKBKB/CHUK/CTSD	4
BP	GO:0019233	sensory perception of pain	3/117	106/18866	0.0282731	0.0541481	0.0250302	PTGS2/MAPK1/CCL2	3
BP	GO:0019395	fatty acid oxidation	3/117	106/18866	0.0282731	0.0541481	0.0250302	PPARG/MAPK14/AKT1	3
BP	GO:0046632	alpha-beta T cell differentiation	3/117	106/18866	0.0282731	0.0541481	0.0250302	BCL2/IFNG/IL4	3
BP	GO:0071868	cellular response to monoamine stimulus	3/117	106/18866	0.0282731	0.0541481	0.0250302	GSK3B/MAPK1/APP	3
BP	GO:0071870	cellular response to catecholamine stimulus	3/117	106/18866	0.0282731	0.0541481	0.0250302	GSK3B/MAPK1/APP	3
BP	GO:1905269	positive regulation of chromatin organization	3/117	106/18866	0.0282731	0.0541481	0.0250302	VEGFA/TP53/IL1B	3
BP	GO:0043266	regulation of potassium ion transport	3/117	107/18866	0.0289606	0.0554367	0.0256258	KCNH2/CAV1/NOS3	3
BP	GO:0002369	T cell cytokine production	2/117	43/18866	0.0291859	0.0557267	0.0257598	IL4/IL1B	2
BP	GO:0040019	positive regulation of embryonic development	2/117	43/18866	0.0291859	0.0557267	0.0257598	AR/GJA1	2
BP	GO:0086004	regulation of cardiac muscle cell contraction	2/117	43/18866	0.0291859	0.0557267	0.0257598	SCN5A/CAV1	2
BP	GO:1901031	regulation of response to reactive oxygen species	2/117	43/18866	0.0291859	0.0557267	0.0257598	MET/NFE2L2	2
BP	GO:1903146	regulation of autophagy of mitochondrion	2/117	43/18866	0.0291859	0.0557267	0.0257598	TP53/HIF1A	2
BP	GO:0098742	cell-cell adhesion via plasma-membrane adhesion molecules	5/117	277/18866	0.0292155	0.0557548	0.0257729	MAPK14/ICAM1/SELE/VCAM1/CLDN4	5
BP	GO:0002062	chondrocyte differentiation	3/117	108/18866	0.0296569	0.0565687	0.0261491	MAPK14/RELA/RUNX2	3
BP	GO:0007369	gastrulation	4/117	189/18866	0.0301694	0.0575171	0.0265875	MMP2/MMP9/TP53/GJA1	4
BP	GO:0002429	immune response-activating cell surface receptor signaling pathway	7/117	481/18866	0.0302946	0.0576974	0.0266708	RELA/IKBKB/BCL2/MAPK1/RAF1/PRKCB/CHUK	7
BP	GO:0002757	immune response-activating signal transduction	7/117	481/18866	0.0302946	0.0576974	0.0266708	RELA/IKBKB/BCL2/MAPK1/RAF1/PRKCB/CHUK	7
BP	GO:0033003	regulation of mast cell activation	2/117	44/18866	0.0304539	0.0577675	0.0267032	HMOX1/IL4	2
BP	GO:0035329	hippo signaling	2/117	44/18866	0.0304539	0.0577675	0.0267032	MAPK14/CASP3	2
BP	GO:0044060	regulation of endocrine process	2/117	44/18866	0.0304539	0.0577675	0.0267032	GJA1/IL1B	2
BP	GO:0045687	positive regulation of glial cell differentiation	2/117	44/18866	0.0304539	0.0577675	0.0267032	PPARG/RELA	2
BP	GO:0097178	ruffle assembly	2/117	44/18866	0.0304539	0.0577675	0.0267032	ICAM1/CAV1	2
BP	GO:1903053	regulation of extracellular matrix organization	2/117	44/18866	0.0304539	0.0577675	0.0267032	DPP4/RB1	2
BP	GO:1905521	regulation of macrophage migration	2/117	44/18866	0.0304539	0.0577675	0.0267032	MAPK14/MAPK1	2
BP	GO:2000404	regulation of T cell migration	2/117	44/18866	0.0304539	0.0577675	0.0267032	APP/CXCL10	2
BP	GO:0007409	axonogenesis	7/117	482/18866	0.0305886	0.0579937	0.0268078	GSK3B/BCL2/VEGFA/MAPK1/APP/ERBB2/SPP1	7
BP	GO:0006575	cellular modified amino acid metabolic process	4/117	190/18866	0.0306754	0.0581	0.0268569	GSTP1/DPEP1/SOD1/NFE2L2	4
BP	GO:0099111	microtubule-based transport	4/117	190/18866	0.0306754	0.0581	0.0268569	APP/HIF1A/SOD1/HSPB1	4
BP	GO:0071867	response to monoamine	3/117	110/18866	0.0310761	0.0587999	0.0271804	GSK3B/MAPK1/APP	3
BP	GO:0071869	response to catecholamine	3/117	110/18866	0.0310761	0.0587999	0.0271804	GSK3B/MAPK1/APP	3
BP	GO:0048167	regulation of synaptic plasticity	4/117	191/18866	0.0311865	0.0589791	0.0272633	PTGS2/GSK3B/MAPK1/APP	4
BP	GO:0071824	protein-DNA complex subunit organization	5/117	282/18866	0.0312126	0.0589989	0.0272724	ESR1/RB1/TP53/MYC/PARP1	5
BP	GO:0001974	blood vessel remodeling	2/117	45/18866	0.0317435	0.0598523	0.0276669	MDM2/NOS3	2
BP	GO:0003197	endocardial cushion development	2/117	45/18866	0.0317435	0.0598523	0.0276669	MDM2/NOS3	2
BP	GO:0045911	positive regulation of DNA recombination	2/117	45/18866	0.0317435	0.0598523	0.0276669	IL4/PARP1	2
BP	GO:0052372	modulation by symbiont of entry into host	2/117	45/18866	0.0317435	0.0598523	0.0276669	CAV1/CXCL8	2
[truncated: 331 more rows]
