# Supplementary material for: Through network pharmacology and molecular docking to explore the underlying mechanism of Artemisia annua L. treating in abdominal aortic aneurysm
Source: Front Physiol. 2022 Oct 20;13:1034014. doi: 10.3389/fphys.2022.1034014 (PMC9634740; doi:10.3389/fphys.2022.1034014)
Supplement: Supplementary file 6 [file Table1.xlsx]

## Sheet: Table-S1 The result of 510 pote
Drug	MolId	MolName	Target
Artemisia annua	MOL002235	EUPATIN	Nitric oxide synthase, inducible
Artemisia annua	MOL002235	EUPATIN	Androgen receptor
Artemisia annua	MOL002235	EUPATIN	Coagulation factor Xa
Artemisia annua	MOL002235	EUPATIN	Prostaglandin G/H synthase 2
Artemisia annua	MOL002235	EUPATIN	Coagulation factor VII
Artemisia annua	MOL002235	EUPATIN	DNA topoisomerase II
Artemisia annua	MOL002235	EUPATIN	Estrogen receptor beta
Artemisia annua	MOL002235	EUPATIN	Dipeptidyl peptidase IV
Artemisia annua	MOL002235	EUPATIN	Heat shock protein HSP 90
Artemisia annua	MOL002235	EUPATIN	Trypsin-1
Artemisia annua	MOL002235	EUPATIN	Nuclear receptor coactivator 2
Artemisia annua	MOL002235	EUPATIN	Calmodulin
Artemisia annua	MOL002235	EUPATIN	Thrombin
Artemisia annua	MOL002235	EUPATIN	Sodium channel protein type 5 subunit alpha
Artemisia annua	MOL002235	EUPATIN	Vascular endothelial growth factor receptor 2
Artemisia annua	MOL002235	EUPATIN	Peroxisome proliferator activated receptor delta
Artemisia annua	MOL000354	isorhamnetin	Nitric oxide synthase, inducible
Artemisia annua	MOL000354	isorhamnetin	Prostaglandin G/H synthase 1
Artemisia annua	MOL000354	isorhamnetin	Estrogen receptor
Artemisia annua	MOL000354	isorhamnetin	Androgen receptor
Artemisia annua	MOL000354	isorhamnetin	Peroxisome proliferator activated receptor gamma
Artemisia annua	MOL000354	isorhamnetin	Prostaglandin G/H synthase 2
Artemisia annua	MOL000354	isorhamnetin	mRNA of Protein-tyrosine phosphatase, non-receptor type 1
Artemisia annua	MOL000354	isorhamnetin	Estrogen receptor beta
Artemisia annua	MOL000354	isorhamnetin	Dipeptidyl peptidase IV
Artemisia annua	MOL000354	isorhamnetin	Mitogen-activated protein kinase 14
Artemisia annua	MOL000354	isorhamnetin	Glycogen synthase kinase-3 beta
Artemisia annua	MOL000354	isorhamnetin	Heat shock protein HSP 90
Artemisia annua	MOL000354	isorhamnetin	Cell division protein kinase 2
Artemisia annua	MOL000354	isorhamnetin	Phosphatidylinositol-4,5-bisphosphate 3-kinase catalytic subunit, gamma isoform
Artemisia annua	MOL000354	isorhamnetin	mRNA of PKA Catalytic Subunit C-alpha
Artemisia annua	MOL000354	isorhamnetin	Trypsin-1
Artemisia annua	MOL000354	isorhamnetin	Proto-oncogene serine/threonine-protein kinase Pim-1
Artemisia annua	MOL000354	isorhamnetin	Cyclin-A2
Artemisia annua	MOL000354	isorhamnetin	Nuclear receptor coactivator 2
Artemisia annua	MOL000354	isorhamnetin	Calmodulin
Artemisia annua	MOL000354	isorhamnetin	Glycogen phosphorylase, muscle form
Artemisia annua	MOL000354	isorhamnetin	Peroxisome proliferator activated receptor delta
Artemisia annua	MOL000354	isorhamnetin	Serine/threonine-protein kinase Chk1
Artemisia annua	MOL000354	isorhamnetin	Aldose reductase
Artemisia annua	MOL000354	isorhamnetin	Nuclear receptor coactivator 1
Artemisia annua	MOL000354	isorhamnetin	Coagulation factor VII
Artemisia annua	MOL000354	isorhamnetin	Thrombin
Artemisia annua	MOL000354	isorhamnetin	Nitric-oxide synthase, endothelial
Artemisia annua	MOL000354	isorhamnetin	Acetylcholinesterase
Artemisia annua	MOL000354	isorhamnetin	Gamma-aminobutyric acid receptor subunit alpha-1
Artemisia annua	MOL000354	isorhamnetin	Amine oxidase [flavin-containing] B
Artemisia annua	MOL000354	isorhamnetin	Glutamate receptor 2
Artemisia annua	MOL000354	isorhamnetin	Cytochrome P450-cam
Artemisia annua	MOL000354	isorhamnetin	Transcription factor p65
Artemisia annua	MOL000354	isorhamnetin	Xanthine dehydrogenase/oxidase
Artemisia annua	MOL000354	isorhamnetin	Neutrophil cytosol factor 1
Artemisia annua	MOL000354	isorhamnetin	Oxidized low-density lipoprotein receptor 1
Artemisia annua	MOL000359	sitosterol	Progesterone receptor
Artemisia annua	MOL000359	sitosterol	Nuclear receptor coactivator 2
Artemisia annua	MOL000359	sitosterol	Mineralocorticoid receptor
Artemisia annua	MOL004083	Tamarixetin	Nitric oxide synthase, inducible
Artemisia annua	MOL004083	Tamarixetin	Prostaglandin G/H synthase 1
Artemisia annua	MOL004083	Tamarixetin	Androgen receptor
Artemisia annua	MOL004083	Tamarixetin	Prostaglandin G/H synthase 2
Artemisia annua	MOL004083	Tamarixetin	Coagulation factor VII
Artemisia annua	MOL004083	Tamarixetin	Dipeptidyl peptidase IV
Artemisia annua	MOL004083	Tamarixetin	Mitogen-activated protein kinase 14
Artemisia annua	MOL004083	Tamarixetin	Glycogen synthase kinase-3 beta
Artemisia annua	MOL004083	Tamarixetin	Heat shock protein HSP 90
Artemisia annua	MOL004083	Tamarixetin	Cell division protein kinase 2
Artemisia annua	MOL004083	Tamarixetin	Serine/threonine-protein kinase Chk1
Artemisia annua	MOL004083	Tamarixetin	Trypsin-1
Artemisia annua	MOL004083	Tamarixetin	Nuclear receptor coactivator 2
Artemisia annua	MOL004083	Tamarixetin	Calmodulin
Artemisia annua	MOL004083	Tamarixetin	Phosphatidylinositol-4,5-bisphosphate 3-kinase catalytic subunit, gamma isoform
Artemisia annua	MOL004112	Patuletin	Nitric oxide synthase, inducible
Artemisia annua	MOL004112	Patuletin	Prostaglandin G/H synthase 1
Artemisia annua	MOL004112	Patuletin	Androgen receptor
Artemisia annua	MOL004112	Patuletin	Prostaglandin G/H synthase 2
Artemisia annua	MOL004112	Patuletin	Coagulation factor VII
Artemisia annua	MOL004112	Patuletin	DNA topoisomerase II
Artemisia annua	MOL004112	Patuletin	Dipeptidyl peptidase IV
Artemisia annua	MOL004112	Patuletin	Heat shock protein HSP 90
Artemisia annua	MOL004112	Patuletin	Cell division protein kinase 2
Artemisia annua	MOL004112	Patuletin	Trypsin-1
Artemisia annua	MOL004112	Patuletin	Nuclear receptor coactivator 2
Artemisia annua	MOL000422	kaempferol	Nitric oxide synthase, inducible
Artemisia annua	MOL000422	kaempferol	Prostaglandin G/H synthase 1
Artemisia annua	MOL000422	kaempferol	Androgen receptor
Artemisia annua	MOL000422	kaempferol	Peroxisome proliferator activated receptor gamma
Artemisia annua	MOL000422	kaempferol	Prostaglandin G/H synthase 2
Artemisia annua	MOL000422	kaempferol	Heat shock protein HSP 90
Artemisia annua	MOL000422	kaempferol	Phosphatidylinositol-4,5-bisphosphate 3-kinase catalytic subunit, gamma isoform
Artemisia annua	MOL000422	kaempferol	mRNA of PKA Catalytic Subunit C-alpha
Artemisia annua	MOL000422	kaempferol	Nuclear receptor coactivator 2
Artemisia annua	MOL000422	kaempferol	Dipeptidyl peptidase IV
Artemisia annua	MOL000422	kaempferol	Trypsin-1
Artemisia annua	MOL000422	kaempferol	Progesterone receptor
Artemisia annua	MOL000422	kaempferol	Thrombin
Artemisia annua	MOL000422	kaempferol	Muscarinic acetylcholine receptor M1
Artemisia annua	MOL000422	kaempferol	Nitric-oxide synthase, endothelial
Artemisia annua	MOL000422	kaempferol	Gamma-aminobutyric-acid receptor alpha-2 subunit
Artemisia annua	MOL000422	kaempferol	Acetylcholinesterase
Artemisia annua	MOL000422	kaempferol	Sodium-dependent noradrenaline transporter
Artemisia annua	MOL000422	kaempferol	Muscarinic acetylcholine receptor M2
Artemisia annua	MOL000422	kaempferol	Alpha-1B adrenergic receptor
Artemisia annua	MOL000422	kaempferol	Gamma-aminobutyric acid receptor subunit alpha-1
Artemisia annua	MOL000422	kaempferol	DNA topoisomerase II
Artemisia annua	MOL000422	kaempferol	Coagulation factor VII
Artemisia annua	MOL000422	kaempferol	Calmodulin
Artemisia annua	MOL000422	kaempferol	Transcription factor p65
Artemisia annua	MOL000422	kaempferol	Inhibitor of nuclear factor kappa-B kinase subunit beta
Artemisia annua	MOL000422	kaempferol	RAC-alpha serine/threonine-protein kinase
Artemisia annua	MOL000422	kaempferol	Apoptosis regulator Bcl-2
Artemisia annua	MOL000422	kaempferol	Apoptosis regulator BAX
Artemisia annua	MOL000422	kaempferol	Tumor necrosis factor
Artemisia annua	MOL000422	kaempferol	Transcription factor AP-1
Artemisia annua	MOL000422	kaempferol	Activator of 90 kDa heat shock protein ATPase homolog 1
Artemisia annua	MOL000422	kaempferol	Caspase-3
Artemisia annua	MOL000422	kaempferol	Mitogen-activated protein kinase 8
Artemisia annua	MOL000422	kaempferol	Xanthine dehydrogenase/oxidase
Artemisia annua	MOL000422	kaempferol	Interstitial collagenase
Artemisia annua	MOL000422	kaempferol	Signal transducer and activator of transcription 1-alpha/beta
Artemisia annua	MOL000422	kaempferol	Cell division control protein 2 homolog
Artemisia annua	MOL000422	kaempferol	Peroxisome proliferator-activated receptor gamma
Artemisia annua	MOL000422	kaempferol	Heme oxygenase 1
Artemisia annua	MOL000422	kaempferol	Cytochrome P450 3A4
Artemisia annua	MOL000422	kaempferol	Cytochrome P450 1A2
Artemisia annua	MOL000422	kaempferol	Cytochrome P450 1A1
Artemisia annua	MOL000422	kaempferol	Intercellular adhesion molecule 1
Artemisia annua	MOL000422	kaempferol	E-selectin
Artemisia annua	MOL000422	kaempferol	Vascular cell adhesion protein 1
Artemisia annua	MOL000422	kaempferol	Nuclear receptor subfamily 1 group I member 2
Artemisia annua	MOL000422	kaempferol	Cytochrome P450 1B1
Artemisia annua	MOL000422	kaempferol	Arachidonate 5-lipoxygenase
Artemisia annua	MOL000422	kaempferol	Hyaluronan synthase 2
Artemisia annua	MOL000422	kaempferol	Glutathione S-transferase P
Artemisia annua	MOL000422	kaempferol	Aryl hydrocarbon receptor
Artemisia annua	MOL000422	kaempferol	26S proteasome non-ATPase regulatory subunit 3
Artemisia annua	MOL000422	kaempferol	Solute carrier family 2, facilitated glucose transporter member 4
Artemisia annua	MOL000422	kaempferol	Nuclear receptor subfamily 1 group I member 3
Artemisia annua	MOL000422	kaempferol	Insulin receptor
Artemisia annua	MOL000422	kaempferol	Type I iodothyronine deiodinase
Artemisia annua	MOL000422	kaempferol	Serine/threonine-protein phosphatase 2B catalytic subunit alpha isoform
Artemisia annua	MOL000422	kaempferol	Peroxidase C1A
Artemisia annua	MOL000422	kaempferol	Glutathione S-transferase Mu 1
Artemisia annua	MOL000422	kaempferol	Glutathione S-transferase Mu 2
Artemisia annua	MOL000422	kaempferol	Aldo-keto reductase family 1 member C3
Artemisia annua	MOL000422	kaempferol	Antileukoproteinase
Artemisia annua	MOL000449	Stigmasterol	Progesterone receptor
Artemisia annua	MOL000449	Stigmasterol	Mineralocorticoid receptor
Artemisia annua	MOL000449	Stigmasterol	Nuclear receptor coactivator 2
Artemisia annua	MOL000449	Stigmasterol	Alcohol dehydrogenase 1C
Artemisia annua	MOL000449	Stigmasterol	Ig gamma-1 chain C region
Artemisia annua	MOL000449	Stigmasterol	Retinoic acid receptor RXR-alpha
Artemisia annua	MOL000449	Stigmasterol	Nuclear receptor coactivator 1
Artemisia annua	MOL000449	Stigmasterol	Prostaglandin G/H synthase 1
Artemisia annua	MOL000449	Stigmasterol	Prostaglandin G/H synthase 2
Artemisia annua	MOL000449	Stigmasterol	Alpha-2A adrenergic receptor
Artemisia annua	MOL000449	Stigmasterol	Sodium-dependent noradrenaline transporter
Artemisia annua	MOL000449	Stigmasterol	Sodium-dependent dopamine transporter
Artemisia annua	MOL000449	Stigmasterol	Beta-2 adrenergic receptor
Artemisia annua	MOL000449	Stigmasterol	Aldose reductase
Artemisia annua	MOL000449	Stigmasterol	Urokinase-type plasminogen activator
Artemisia annua	MOL000449	Stigmasterol	Leukotriene A-4 hydrolase
Artemisia annua	MOL000449	Stigmasterol	Amine oxidase [flavin-containing] B
Artemisia annua	MOL000449	Stigmasterol	Amine oxidase [flavin-containing] A
Artemisia annua	MOL000449	Stigmasterol	mRNA of PKA Catalytic Subunit C-alpha
Artemisia annua	MOL000449	Stigmasterol	Chymotrypsinogen B
Artemisia annua	MOL000449	Stigmasterol	Muscarinic acetylcholine receptor M3
Artemisia annua	MOL000449	Stigmasterol	Muscarinic acetylcholine receptor M1
Artemisia annua	MOL000449	Stigmasterol	Beta-1 adrenergic receptor
Artemisia annua	MOL000449	Stigmasterol	Sodium channel protein type 5 subunit alpha
Artemisia annua	MOL000449	Stigmasterol	5-hydroxytryptamine 2A receptor
Artemisia annua	MOL000449	Stigmasterol	Alpha-1A adrenergic receptor
Artemisia annua	MOL000449	Stigmasterol	Gamma-aminobutyric-acid receptor alpha-3 subunit
Artemisia annua	MOL000449	Stigmasterol	Muscarinic acetylcholine receptor M2
Artemisia annua	MOL000449	Stigmasterol	Alpha-1B adrenergic receptor
Artemisia annua	MOL000449	Stigmasterol	Gamma-aminobutyric acid receptor subunit alpha-1
Artemisia annua	MOL000449	Stigmasterol	Neuronal acetylcholine receptor protein, alpha-7 chain
Artemisia annua	MOL004609	Areapillin	Nitric oxide synthase, inducible
Artemisia annua	MOL004609	Areapillin	Thrombin
Artemisia annua	MOL004609	Areapillin	Androgen receptor
Artemisia annua	MOL004609	Areapillin	Sodium channel protein type 5 subunit alpha
Artemisia annua	MOL004609	Areapillin	Coagulation factor Xa
Artemisia annua	MOL004609	Areapillin	Prostaglandin G/H synthase 2
Artemisia annua	MOL004609	Areapillin	Coagulation factor VII
Artemisia annua	MOL004609	Areapillin	mRNA of Protein-tyrosine phosphatase, non-receptor type 1
Artemisia annua	MOL004609	Areapillin	DNA topoisomerase II
Artemisia annua	MOL004609	Areapillin	Estrogen receptor beta
Artemisia annua	MOL004609	Areapillin	Dipeptidyl peptidase IV
Artemisia annua	MOL004609	Areapillin	Heat shock protein HSP 90
Artemisia annua	MOL004609	Areapillin	Ig gamma-1 chain C region
Artemisia annua	MOL004609	Areapillin	Trypsin-1
Artemisia annua	MOL004609	Areapillin	Nuclear receptor coactivator 2
Artemisia annua	MOL004609	Areapillin	Nuclear receptor coactivator 1
Artemisia annua	MOL004609	Areapillin	Calmodulin
Artemisia annua	MOL005229	Artemetin	Nitric oxide synthase, inducible
Artemisia annua	MOL005229	Artemetin	Thrombin
Artemisia annua	MOL005229	Artemetin	Potassium voltage-gated channel subfamily H member 2
Artemisia annua	MOL005229	Artemetin	Estrogen receptor
Artemisia annua	MOL005229	Artemetin	Androgen receptor
Artemisia annua	MOL005229	Artemetin	Sodium channel protein type 5 subunit alpha
Artemisia annua	MOL005229	Artemetin	Peroxisome proliferator activated receptor gamma
Artemisia annua	MOL005229	Artemetin	Coagulation factor Xa
Artemisia annua	MOL005229	Artemetin	Prostaglandin G/H synthase 2
Artemisia annua	MOL005229	Artemetin	Coagulation factor VII
Artemisia annua	MOL005229	Artemetin	mRNA of Protein-tyrosine phosphatase, non-receptor type 1
Artemisia annua	MOL005229	Artemetin	DNA topoisomerase II
Artemisia annua	MOL005229	Artemetin	Estrogen receptor beta
Artemisia annua	MOL005229	Artemetin	Dipeptidyl peptidase IV
Artemisia annua	MOL005229	Artemetin	Mitogen-activated protein kinase 14
Artemisia annua	MOL005229	Artemetin	Glycogen synthase kinase-3 beta
Artemisia annua	MOL005229	Artemetin	Heat shock protein HSP 90
Artemisia annua	MOL005229	Artemetin	Cell division protein kinase 2
Artemisia annua	MOL005229	Artemetin	Serine/threonine-protein kinase Chk1
Artemisia annua	MOL005229	Artemetin	Trypsin-1
Artemisia annua	MOL005229	Artemetin	Nuclear receptor coactivator 2
Artemisia annua	MOL005229	Artemetin	Calcium-activated potassium channel subunit alpha 1
Artemisia annua	MOL005229	Artemetin	Calmodulin
Artemisia annua	MOL000006	luteolin	Prostaglandin G/H synthase 1
Artemisia annua	MOL000006	luteolin	Androgen receptor
Artemisia annua	MOL000006	luteolin	Prostaglandin G/H synthase 2
Artemisia annua	MOL000006	luteolin	Heat shock protein HSP 90
Artemisia annua	MOL000006	luteolin	Trypsin-1
Artemisia annua	MOL000006	luteolin	Nuclear receptor coactivator 2
Artemisia annua	MOL000006	luteolin	mRNA of PKA Catalytic Subunit C-alpha
Artemisia annua	MOL000006	luteolin	Dipeptidyl peptidase IV
Artemisia annua	MOL000006	luteolin	Phosphatidylinositol-4,5-bisphosphate 3-kinase catalytic subunit, gamma isoform
Artemisia annua	MOL000006	luteolin	Transcription factor p65
Artemisia annua	MOL000006	luteolin	Epidermal growth factor receptor
Artemisia annua	MOL000006	luteolin	RAC-alpha serine/threonine-protein kinase
Artemisia annua	MOL000006	luteolin	Vascular endothelial growth factor A
Artemisia annua	MOL000006	luteolin	G1/S-specific cyclin-D1
Artemisia annua	MOL000006	luteolin	Bcl-2-like protein 1
Artemisia annua	MOL000006	luteolin	Cyclin-dependent kinase inhibitor 1
Artemisia annua	MOL000006	luteolin	Caspase-9
Artemisia annua	MOL000006	luteolin	72 kDa type IV collagenase
Artemisia annua	MOL000006	luteolin	Matrix metalloproteinase-9
Artemisia annua	MOL000006	luteolin	Mitogen-activated protein kinase 1
Artemisia annua	MOL000006	luteolin	Interleukin-10
Artemisia annua	MOL000006	luteolin	Retinoblastoma-associated protein
Artemisia annua	MOL000006	luteolin	Cell division protein kinase 4
Artemisia annua	MOL000006	luteolin	Tumor necrosis factor
Artemisia annua	MOL000006	luteolin	Transcription factor AP-1
Artemisia annua	MOL000006	luteolin	Interleukin-6
Artemisia annua	MOL000006	luteolin	Caspase-3
Artemisia annua	MOL000006	luteolin	Cellular tumor antigen p53
Artemisia annua	MOL000006	luteolin	NF-kappa-B inhibitor alpha
Artemisia annua	MOL000006	luteolin	Xanthine dehydrogenase/oxidase
Artemisia annua	MOL000006	luteolin	DNA topoisomerase 1
Artemisia annua	MOL000006	luteolin	E3 ubiquitin-protein ligase Mdm2
Artemisia annua	MOL000006	luteolin	Amyloid beta A4 protein
Artemisia annua	MOL000006	luteolin	Interstitial collagenase
Artemisia annua	MOL000006	luteolin	Proliferating cell nuclear antigen
Artemisia annua	MOL000006	luteolin	Receptor tyrosine-protein kinase erbB-2
Artemisia annua	MOL000006	luteolin	Peroxisome proliferator-activated receptor gamma
Artemisia annua	MOL000006	luteolin	Heme oxygenase 1
Artemisia annua	MOL000006	luteolin	Caspase-7
Artemisia annua	MOL000006	luteolin	Intercellular adhesion molecule 1
Artemisia annua	MOL000006	luteolin	Induced myeloid leukemia cell differentiation protein Mcl-1
Artemisia annua	MOL000006	luteolin	Baculoviral IAP repeat-containing protein 5
Artemisia annua	MOL000006	luteolin	Interleukin-2
Artemisia annua	MOL000006	luteolin	G2/mitotic-specific cyclin-B1
Artemisia annua	MOL000006	luteolin	Tyrosinase
Artemisia annua	MOL000006	luteolin	Interferon gamma
Artemisia annua	MOL000006	luteolin	Interleukin-4
Artemisia annua	MOL000006	luteolin	DNA topoisomerase 2-alpha
Artemisia annua	MOL000006	luteolin	Glutathione S-transferase P
Artemisia annua	MOL000006	luteolin	Baculoviral IAP repeat-containing protein 4
Artemisia annua	MOL000006	luteolin	Solute carrier family 2, facilitated glucose transporter member 4
Artemisia annua	MOL000006	luteolin	Insulin receptor
Artemisia annua	MOL000006	luteolin	CD40 ligand
Artemisia annua	MOL000006	luteolin	Prostaglandin E synthase
Artemisia annua	MOL000006	luteolin	Kinetochore protein Nuf2
Artemisia annua	MOL000006	luteolin	Adenylate cyclase type 2
Artemisia annua	MOL000006	luteolin	Hepatocyte growth factor receptor
Artemisia annua	MOL007274	Skrofulein	Nitric oxide synthase, inducible
Artemisia annua	MOL007274	Skrofulein	Prostaglandin G/H synthase 1
Artemisia annua	MOL007274	Skrofulein	Sodium channel protein type 5 subunit alpha
Artemisia annua	MOL007274	Skrofulein	Prostaglandin G/H synthase 2
Artemisia annua	MOL007274	Skrofulein	Dipeptidyl peptidase IV
Artemisia annua	MOL007274	Skrofulein	Heat shock protein HSP 90
Artemisia annua	MOL007274	Skrofulein	mRNA of PKA Catalytic Subunit C-alpha
Artemisia annua	MOL007274	Skrofulein	Trypsin-1
Artemisia annua	MOL007274	Skrofulein	Nuclear receptor coactivator 2
Artemisia annua	MOL007274	Skrofulein	Nuclear receptor coactivator 1
Artemisia annua	MOL007274	Skrofulein	Calmodulin
Artemisia annua	MOL007401	Cirsiliol	Nitric oxide synthase, inducible
Artemisia annua	MOL007401	Cirsiliol	Sodium channel protein type 5 subunit alpha
Artemisia annua	MOL007401	Cirsiliol	Prostaglandin G/H synthase 2
Artemisia annua	MOL007401	Cirsiliol	Coagulation factor VII
Artemisia annua	MOL007401	Cirsiliol	Dipeptidyl peptidase IV
Artemisia annua	MOL007401	Cirsiliol	Glycogen phosphorylase, muscle form
Artemisia annua	MOL007401	Cirsiliol	Heat shock protein HSP 90
Artemisia annua	MOL007401	Cirsiliol	Trypsin-1
Artemisia annua	MOL007401	Cirsiliol	Nuclear receptor coactivator 2
Artemisia annua	MOL007401	Cirsiliol	Calmodulin
Artemisia annua	MOL007404	vitexin_qt	Nitric oxide synthase, inducible
Artemisia annua	MOL007404	vitexin_qt	Prostaglandin G/H synthase 1
Artemisia annua	MOL007404	vitexin_qt	Estrogen receptor
Artemisia annua	MOL007404	vitexin_qt	Androgen receptor
Artemisia annua	MOL007404	vitexin_qt	Peroxisome proliferator activated receptor gamma
Artemisia annua	MOL007404	vitexin_qt	Prostaglandin G/H synthase 2
Artemisia annua	MOL007404	vitexin_qt	Dipeptidyl peptidase IV
Artemisia annua	MOL007404	vitexin_qt	Mitogen-activated protein kinase 14
Artemisia annua	MOL007404	vitexin_qt	Glycogen synthase kinase-3 beta
Artemisia annua	MOL007404	vitexin_qt	Heat shock protein HSP 90
Artemisia annua	MOL007404	vitexin_qt	Cell division protein kinase 2
Artemisia annua	MOL007404	vitexin_qt	Beta-lactamase
Artemisia annua	MOL007404	vitexin_qt	mRNA of PKA Catalytic Subunit C-alpha
Artemisia annua	MOL007404	vitexin_qt	Proto-oncogene serine/threonine-protein kinase Pim-1
Artemisia annua	MOL007404	vitexin_qt	Cyclin-A2
Artemisia annua	MOL007412	DMQT	Nitric oxide synthase, inducible
Artemisia annua	MOL007412	DMQT	Thrombin
Artemisia annua	MOL007412	DMQT	Androgen receptor
Artemisia annua	MOL007412	DMQT	Sodium channel protein type 5 subunit alpha
Artemisia annua	MOL007412	DMQT	Prostaglandin G/H synthase 2
Artemisia annua	MOL007412	DMQT	Coagulation factor VII
Artemisia annua	MOL007412	DMQT	DNA topoisomerase II
Artemisia annua	MOL007412	DMQT	Dipeptidyl peptidase IV
Artemisia annua	MOL007412	DMQT	Trypsin-1
Artemisia annua	MOL007412	DMQT	Nuclear receptor coactivator 2
Artemisia annua	MOL007415	[(2S)-2-[[(2S)-2-(benzoylamino)-3-phenylpropanoyl]amino]-3-phenylpropyl] acetate	Thrombin
Artemisia annua	MOL007415	[(2S)-2-[[(2S)-2-(benzoylamino)-3-phenylpropanoyl]amino]-3-phenylpropyl] acetate	Potassium voltage-gated channel subfamily H member 2
Artemisia annua	MOL007415	[(2S)-2-[[(2S)-2-(benzoylamino)-3-phenylpropanoyl]amino]-3-phenylpropyl] acetate	Coagulation factor Xa
Artemisia annua	MOL007415	[(2S)-2-[[(2S)-2-(benzoylamino)-3-phenylpropanoyl]amino]-3-phenylpropyl] acetate	Prostaglandin G/H synthase 2
Artemisia annua	MOL007415	[(2S)-2-[[(2S)-2-(benzoylamino)-3-phenylpropanoyl]amino]-3-phenylpropyl] acetate	Trypsin-1
Artemisia annua	MOL007423	6,8-di-c-glucosylapigenin_qt	Nitric oxide synthase, inducible
Artemisia annua	MOL007423	6,8-di-c-glucosylapigenin_qt	Prostaglandin G/H synthase 1
Artemisia annua	MOL007423	6,8-di-c-glucosylapigenin_qt	Estrogen receptor
Artemisia annua	MOL007423	6,8-di-c-glucosylapigenin_qt	Androgen receptor
Artemisia annua	MOL007423	6,8-di-c-glucosylapigenin_qt	Peroxisome proliferator activated receptor gamma
Artemisia annua	MOL007423	6,8-di-c-glucosylapigenin_qt	Prostaglandin G/H synthase 2
Artemisia annua	MOL007423	6,8-di-c-glucosylapigenin_qt	Carbonic anhydrase II
Artemisia annua	MOL007423	6,8-di-c-glucosylapigenin_qt	Dipeptidyl peptidase IV
Artemisia annua	MOL007423	6,8-di-c-glucosylapigenin_qt	Mitogen-activated protein kinase 14
Artemisia annua	MOL007423	6,8-di-c-glucosylapigenin_qt	Glycogen synthase kinase-3 beta
Artemisia annua	MOL007423	6,8-di-c-glucosylapigenin_qt	Heat shock protein HSP 90
Artemisia annua	MOL007423	6,8-di-c-glucosylapigenin_qt	Cell division protein kinase 2
Artemisia annua	MOL007423	6,8-di-c-glucosylapigenin_qt	Beta-lactamase
Artemisia annua	MOL007423	6,8-di-c-glucosylapigenin_qt	mRNA of PKA Catalytic Subunit C-alpha
Artemisia annua	MOL007423	6,8-di-c-glucosylapigenin_qt	Proto-oncogene serine/threonine-protein kinase Pim-1
Artemisia annua	MOL007423	6,8-di-c-glucosylapigenin_qt	Cyclin-A2
Artemisia annua	MOL007424	artemisinin	Transcription factor p65
Artemisia annua	MOL007424	artemisinin	Vascular endothelial growth factor A
Artemisia annua	MOL007424	artemisinin	Cell division protein kinase 4
Artemisia annua	MOL007424	artemisinin	Tyrosyl-DNA phosphodiesterase 1
Artemisia annua	MOL007424	artemisinin	Hypoxia-inducible factor 1-alpha
Artemisia annua	MOL007424	artemisinin	Cytochrome P450 3A4
Artemisia annua	MOL007424	artemisinin	Superoxide dismutase [Mn], mitochondrial
Artemisia annua	MOL007424	artemisinin	Multidrug resistance protein 1
Artemisia annua	MOL007424	artemisinin	Nuclear receptor subfamily 1 group I member 2
Artemisia annua	MOL007424	artemisinin	Glutathione S-transferase P
Artemisia annua	MOL007424	artemisinin	Cytochrome P450 2B6
Artemisia annua	MOL007424	artemisinin	Nuclear receptor subfamily 1 group I member 3
Artemisia annua	MOL007424	artemisinin	Vascular endothelial growth factor C
Artemisia annua	MOL007424	artemisinin	Glutathione S-transferase A1
Artemisia annua	MOL007424	artemisinin	Peroxiredoxin-4
Artemisia annua	MOL007426	deoxyartemisinin	Gamma-aminobutyric acid receptor subunit alpha-1
Artemisia annua	MOL000098	quercetin	Prostaglandin G/H synthase 1
Artemisia annua	MOL000098	quercetin	Androgen receptor
Artemisia annua	MOL000098	quercetin	Peroxisome proliferator activated receptor gamma
Artemisia annua	MOL000098	quercetin	Prostaglandin G/H synthase 2
Artemisia annua	MOL000098	quercetin	Heat shock protein HSP 90
Artemisia annua	MOL000098	quercetin	Phosphatidylinositol-4,5-bisphosphate 3-kinase catalytic subunit, gamma isoform
Artemisia annua	MOL000098	quercetin	Nuclear receptor coactivator 2
Artemisia annua	MOL000098	quercetin	Dipeptidyl peptidase IV
Artemisia annua	MOL000098	quercetin	Aldose reductase
Artemisia annua	MOL000098	quercetin	Trypsin-1
Artemisia annua	MOL000098	quercetin	DNA topoisomerase II
Artemisia annua	MOL000098	quercetin	Thrombin
Artemisia annua	MOL000098	quercetin	Potassium voltage-gated channel subfamily H member 2
Artemisia annua	MOL000098	quercetin	Sodium channel protein type 5 subunit alpha
Artemisia annua	MOL000098	quercetin	Coagulation factor Xa
Artemisia annua	MOL000098	quercetin	Beta-2 adrenergic receptor
Artemisia annua	MOL000098	quercetin	Stromelysin-1
Artemisia annua	MOL000098	quercetin	mRNA of PKA Catalytic Subunit C-alpha
Artemisia annua	MOL000098	quercetin	Coagulation factor VII
Artemisia annua	MOL000098	quercetin	Nitric-oxide synthase, endothelial
Artemisia annua	MOL000098	quercetin	Retinoic acid receptor RXR-alpha
Artemisia annua	MOL000098	quercetin	Acetylcholinesterase
Artemisia annua	MOL000098	quercetin	Gamma-aminobutyric acid receptor subunit alpha-1
Artemisia annua	MOL000098	quercetin	Amine oxidase [flavin-containing] B
Artemisia annua	MOL000098	quercetin	Transcription factor p65
Artemisia annua	MOL000098	quercetin	Epidermal growth factor receptor
Artemisia annua	MOL000098	quercetin	RAC-alpha serine/threonine-protein kinase
Artemisia annua	MOL000098	quercetin	Vascular endothelial growth factor A
Artemisia annua	MOL000098	quercetin	G1/S-specific cyclin-D1
Artemisia annua	MOL000098	quercetin	Apoptosis regulator Bcl-2
Artemisia annua	MOL000098	quercetin	Bcl-2-like protein 1
Artemisia annua	MOL000098	quercetin	Proto-oncogene c-Fos
Artemisia annua	MOL000098	quercetin	Cyclin-dependent kinase inhibitor 1
Artemisia annua	MOL000098	quercetin	Eukaryotic translation initiation factor 6
Artemisia annua	MOL000098	quercetin	Apoptosis regulator BAX
Artemisia annua	MOL000098	quercetin	Caspase-9
Artemisia annua	MOL000098	quercetin	Urokinase-type plasminogen activator
Artemisia annua	MOL000098	quercetin	72 kDa type IV collagenase
Artemisia annua	MOL000098	quercetin	Matrix metalloproteinase-9
Artemisia annua	MOL000098	quercetin	Mitogen-activated protein kinase 1
Artemisia annua	MOL000098	quercetin	Interleukin-10
Artemisia annua	MOL000098	quercetin	Pro-epidermal growth factor
Artemisia annua	MOL000098	quercetin	Retinoblastoma-associated protein
Artemisia annua	MOL000098	quercetin	Tumor necrosis factor
Artemisia annua	MOL000098	quercetin	Transcription factor AP-1
Artemisia annua	MOL000098	quercetin	Interleukin-6
Artemisia annua	MOL000098	quercetin	Cyclin-dependent kinase inhibitor 2A, isoforms 1/2/3
Artemisia annua	MOL000098	quercetin	Activator of 90 kDa heat shock protein ATPase homolog 1
Artemisia annua	MOL000098	quercetin	Caspase-3
Artemisia annua	MOL000098	quercetin	Cellular tumor antigen p53
Artemisia annua	MOL000098	quercetin	ETS domain-containing protein Elk-1
Artemisia annua	MOL000098	quercetin	NF-kappa-B inhibitor alpha
Artemisia annua	MOL000098	quercetin	NADPH--cytochrome P450 reductase
Artemisia annua	MOL000098	quercetin	Ornithine decarboxylase
Artemisia annua	MOL000098	quercetin	Xanthine dehydrogenase/oxidase
Artemisia annua	MOL000098	quercetin	Caspase-8
Artemisia annua	MOL000098	quercetin	DNA topoisomerase 1
Artemisia annua	MOL000098	quercetin	RAF proto-oncogene serine/threonine-protein kinase
Artemisia annua	MOL000098	quercetin	Superoxide dismutase [Cu-Zn]
Artemisia annua	MOL000098	quercetin	Protein kinase C alpha type
Artemisia annua	MOL000098	quercetin	Interstitial collagenase
Artemisia annua	MOL000098	quercetin	Hypoxia-inducible factor 1-alpha
Artemisia annua	MOL000098	quercetin	Signal transducer and activator of transcription 1-alpha/beta
Artemisia annua	MOL000098	quercetin	Protein CBFA2T1
Artemisia annua	MOL000098	quercetin	Probable E3 ubiquitin-protein ligase HERC5
Artemisia annua	MOL000098	quercetin	Cell division control protein 2 homolog
Artemisia annua	MOL000098	quercetin	78 kDa glucose-regulated protein
Artemisia annua	MOL000098	quercetin	Receptor tyrosine-protein kinase erbB-2
Artemisia annua	MOL000098	quercetin	Peroxisome proliferator-activated receptor gamma
Artemisia annua	MOL000098	quercetin	Acetyl-CoA carboxylase 1
Artemisia annua	MOL000098	quercetin	Heme oxygenase 1
Artemisia annua	MOL000098	quercetin	Cytochrome P450 3A4
Artemisia annua	MOL000098	quercetin	Cytochrome P450 1A2
Artemisia annua	MOL000098	quercetin	Caveolin-1
Artemisia annua	MOL000098	quercetin	Myc proto-oncogene protein
Artemisia annua	MOL000098	quercetin	Tissue factor
Artemisia annua	MOL000098	quercetin	Gap junction alpha-1 protein
Artemisia annua	MOL000098	quercetin	Cytochrome P450 1A1
Artemisia annua	MOL000098	quercetin	Intercellular adhesion molecule 1
Artemisia annua	MOL000098	quercetin	Interleukin-1 beta
Artemisia annua	MOL000098	quercetin	C-C motif chemokine 2
Artemisia annua	MOL000098	quercetin	E-selectin
Artemisia annua	MOL000098	quercetin	Vascular cell adhesion protein 1
Artemisia annua	MOL000098	quercetin	Prostaglandin E2 receptor EP3 subtype
Artemisia annua	MOL000098	quercetin	Interleukin-8
Artemisia annua	MOL000098	quercetin	Protein kinase C beta type
Artemisia annua	MOL000098	quercetin	Baculoviral IAP repeat-containing protein 5
Artemisia annua	MOL000098	quercetin	Dual oxidase 2
Artemisia annua	MOL000098	quercetin	Nitric oxide synthase, endothelial
Artemisia annua	MOL000098	quercetin	Heat shock protein beta-1
Artemisia annua	MOL000098	quercetin	Transforming growth factor beta-1
Artemisia annua	MOL000098	quercetin	Estrogen sulfotransferase
Artemisia annua	MOL000098	quercetin	Maltase-glucoamylase, intestinal
Artemisia annua	MOL000098	quercetin	Interleukin-2
Artemisia annua	MOL000098	quercetin	Nuclear receptor subfamily 1 group I member 2
Artemisia annua	MOL000098	quercetin	Cytochrome P450 1B1
Artemisia annua	MOL000098	quercetin	G2/mitotic-specific cyclin-B1
Artemisia annua	MOL000098	quercetin	Tissue-type plasminogen activator
Artemisia annua	MOL000098	quercetin	Thrombomodulin
Artemisia annua	MOL000098	quercetin	Plasminogen activator inhibitor 1
Artemisia annua	MOL000098	quercetin	Collagen alpha-1(I) chain
Artemisia annua	MOL000098	quercetin	Interferon gamma
Artemisia annua	MOL000098	quercetin	Arachidonate 5-lipoxygenase
Artemisia annua	MOL000098	quercetin	Phosphatidylinositol-3,4,5-trisphosphate 3-phosphatase and dual-specificity protein phosphatase PTEN
Artemisia annua	MOL000098	quercetin	Interleukin-1 alpha
Artemisia annua	MOL000098	quercetin	Myeloperoxidase
Artemisia annua	MOL000098	quercetin	DNA topoisomerase 2-alpha
Artemisia annua	MOL000098	quercetin	Neutrophil cytosol factor 1
Artemisia annua	MOL000098	quercetin	ATP-binding cassette sub-family G member 2
Artemisia annua	MOL000098	quercetin	Hyaluronan synthase 2
Artemisia annua	MOL000098	quercetin	Glutathione S-transferase P
Artemisia annua	MOL000098	quercetin	Nuclear factor erythroid 2-related factor 2
Artemisia annua	MOL000098	quercetin	NAD(P)H dehydrogenase [quinone] 1
Artemisia annua	MOL000098	quercetin	Poly [ADP-ribose] polymerase 1
Artemisia annua	MOL000098	quercetin	Aryl hydrocarbon receptor
Artemisia annua	MOL000098	quercetin	26S proteasome non-ATPase regulatory subunit 3
Artemisia annua	MOL000098	quercetin	Solute carrier family 2, facilitated glucose transporter member 4
Artemisia annua	MOL000098	quercetin	Collagen alpha-1(III) chain
Artemisia annua	MOL000098	quercetin	DNA gyrase subunit B
Artemisia annua	MOL000098	quercetin	C-X-C motif chemokine 11
Artemisia annua	MOL000098	quercetin	C-X-C motif chemokine 2
Artemisia annua	MOL000098	quercetin	DDB1- and CUL4-associated factor 5
Artemisia annua	MOL000098	quercetin	Nuclear receptor subfamily 1 group I member 3
Artemisia annua	MOL000098	quercetin	Serine/threonine-protein kinase Chk2
Artemisia annua	MOL000098	quercetin	Insulin receptor
Artemisia annua	MOL000098	quercetin	Claudin-4
Artemisia annua	MOL000098	quercetin	Peroxisome proliferator-activated receptor alpha
Artemisia annua	MOL000098	quercetin	Peroxisome proliferator-activated receptor delta
Artemisia annua	MOL000098	quercetin	Heat shock factor protein 1
Artemisia annua	MOL000098	quercetin	C-reactive protein
Artemisia annua	MOL000098	quercetin	C-X-C motif chemokine 10
Artemisia annua	MOL000098	quercetin	Inhibitor of nuclear factor kappa-B kinase subunit alpha
Artemisia annua	MOL000098	quercetin	Osteopontin
Artemisia annua	MOL000098	quercetin	Runt-related transcription factor 2
Artemisia annua	MOL000098	quercetin	Ras association domain-containing protein 1
Artemisia annua	MOL000098	quercetin	Transcription factor E2F1
Artemisia annua	MOL000098	quercetin	Transcription factor E2F2
Artemisia annua	MOL000098	quercetin	Prostatic acid phosphatase
Artemisia annua	MOL000098	quercetin	Cathepsin D
Artemisia annua	MOL000098	quercetin	Insulin-like growth factor-binding protein 3
Artemisia annua	MOL000098	quercetin	Insulin-like growth factor II
Artemisia annua	MOL000098	quercetin	CD40 ligand
Artemisia annua	MOL000098	quercetin	Interferon regulatory factor 1
Artemisia annua	MOL000098	quercetin	Receptor tyrosine-protein kinase erbB-3
Artemisia annua	MOL000098	quercetin	Serum paraoxonase/arylesterase 1
Artemisia annua	MOL000098	quercetin	Type I iodothyronine deiodinase
Artemisia annua	MOL000098	quercetin	Procollagen C-endopeptidase enhancer 1
Artemisia annua	MOL000098	quercetin	Puromycin-sensitive aminopeptidase
Artemisia annua	MOL000098	quercetin	Hexokinase-2
Artemisia annua	MOL000098	quercetin	Homeobox protein Nkx-3.1
Artemisia annua	MOL000098	quercetin	Ras GTPase-activating protein 1
Artemisia annua	MOL000098	quercetin	Peroxidase C1A
Artemisia annua	MOL000098	quercetin	Glutathione S-transferase Mu 1
Artemisia annua	MOL000098	quercetin	Glutathione S-transferase Mu 2
