# Supplementary material for: Through network pharmacology and molecular docking to explore the underlying mechanism of Artemisia annua L. treating in abdominal aortic aneurysm
Source: Front Physiol. 2022 Oct 20;13:1034014. doi: 10.3389/fphys.2022.1034014 (PMC9634740; doi:10.3389/fphys.2022.1034014)
Supplement: Supplementary file 7 [file Table5.xlsx]

## Sheet: Table-S5 The result of the KEGG
ID	Description	GeneRatio	BgRatio	pvalue	p.adjust	qvalue	geneID	Count
hsa04933	AGE-RAGE signaling pathway in diabetic complications	28/112	100/8081	5.85e-30	1.38e-27	4.87e-28	MAPK14/RELA/AKT1/BCL2/JUN/CASP3/MAPK8/STAT1/ICAM1/SELE/VCAM1/VEGFA/CCND1/MMP2/MAPK1/CDK4/VEGFC/F3/IL1B/CCL2/CXCL8/PRKCB/NOS3/THBD/SERPINE1/COL1A1/IL1A/COL3A1	28
hsa05418	Fluid shear stress and atherosclerosis	30/112	139/8081	2.22e-28	2.61e-26	9.22e-27	KDR/MAPK14/RELA/NCF1/IKBKB/AKT1/BCL2/JUN/MAPK8/HMOX1/ICAM1/SELE/VCAM1/GSTP1/VEGFA/MMP2/MMP9/TP53/IFNG/FOS/CAV1/IL1B/CCL2/NOS3/PLAT/THBD/IL1A/NFE2L2/NQO1/CHUK	30
hsa05215	Prostate cancer	25/112	97/8081	9.53e-26	7.46e-24	2.64e-24	AR/GSK3B/CDK2/RELA/IKBKB/AKT1/BCL2/GSTP1/PLAU/EGFR/CCND1/CDKN1A/CASP9/MMP9/MAPK1/RB1/TP53/NFKBIA/MDM2/ERBB2/MMP3/EGF/RAF1/PLAT/CHUK	25
hsa04657	IL-17 signaling pathway	23/112	94/8081	3.84e-23	2.26e-21	7.99e-22	PTGS2/MAPK14/GSK3B/RELA/IKBKB/JUN/CASP3/MAPK8/MMP1/MMP9/MAPK1/NFKBIA/IFNG/IL4/MMP3/FOS/CASP8/IL1B/CCL2/CXCL8/CXCL2/CXCL10/CHUK	23
hsa05219	Bladder cancer	17/112	41/8081	8.43e-22	3.96e-20	1.4e-20	MMP1/EGFR/VEGFA/CCND1/CDKN1A/MMP2/MMP9/MAPK1/RB1/CDK4/TP53/MDM2/ERBB2/EGF/RAF1/MYC/CXCL8	17
hsa05167	Kaposi sarcoma-associated herpesvirus infection	28/112	193/8081	1.87e-21	7.32e-20	2.59e-20	PTGS2/MAPK14/GSK3B/RELA/IKBKB/AKT1/JUN/CASP3/MAPK8/STAT1/ICAM1/VEGFA/CCND1/CDKN1A/CASP9/MAPK1/RB1/CDK4/TP53/NFKBIA/HIF1A/FOS/CASP8/RAF1/MYC/CXCL8/CXCL2/CHUK	28
hsa04668	TNF signaling pathway	23/112	112/8081	2.96e-21	9.95e-20	3.52e-20	PTGS2/MAPK14/RELA/IKBKB/AKT1/JUN/CASP3/MAPK8/ICAM1/SELE/VCAM1/MMP9/MAPK1/NFKBIA/VEGFC/MMP3/FOS/CASP8/IL1B/CCL2/CXCL2/CXCL10/CHUK	23
hsa05161	Hepatitis B	25/112	162/8081	7.49e-20	2.2e-18	7.79e-19	MAPK14/CDK2/RELA/IKBKB/AKT1/BCL2/JUN/CASP3/MAPK8/STAT1/CDKN1A/CASP9/MMP9/MAPK1/RB1/TP53/NFKBIA/BIRC5/FOS/CASP8/RAF1/MYC/CXCL8/PRKCB/CHUK	25
hsa05163	Human cytomegalovirus infection	28/112	225/8081	1.34e-19	3.5e-18	1.24e-18	PTGS2/MAPK14/GSK3B/RELA/IKBKB/AKT1/CASP3/EGFR/VEGFA/CCND1/CDKN1A/CASP9/MAPK1/RB1/CDK4/IL6R/TP53/NFKBIA/MDM2/CASP8/RAF1/MYC/IL1B/CCL2/PTGER3/CXCL8/PRKCB/CHUK	28
hsa05212	Pancreatic cancer	19/112	76/8081	2.04e-19	4.78e-18	1.69e-18	RELA/IKBKB/AKT1/MAPK8/STAT1/EGFR/VEGFA/CCND1/BCL2L1/CDKN1A/CASP9/MAPK1/RB1/CDK4/TP53/ERBB2/EGF/RAF1/CHUK	19
hsa05160	Hepatitis C	24/112	157/8081	5.68e-19	1.21e-17	4.29e-18	GSK3B/CDK2/RELA/IKBKB/AKT1/CASP3/STAT1/EGFR/CCND1/CDKN1A/CASP9/MAPK1/RB1/CDK4/TP53/NFKBIA/IFNG/EGF/CASP8/RAF1/MYC/CLDN4/CXCL10/CHUK	24
hsa01522	Endocrine resistance	20/112	98/8081	1.68e-18	3.28e-17	1.16e-17	ESR2/ESR1/MAPK14/AKT1/BCL2/JUN/MAPK8/EGFR/CCND1/CDKN1A/MMP2/MMP9/MAPK1/RB1/CDK4/TP53/MDM2/ERBB2/FOS/RAF1	20
hsa04151	PI3K-Akt signaling pathway	32/112	354/8081	3.71e-18	6.72e-17	2.38e-17	KDR/GSK3B/CDK2/RELA/IKBKB/AKT1/BCL2/EGFR/VEGFA/CCND1/BCL2L1/CDKN1A/CASP9/MAPK1/CDK4/IL6R/TP53/MDM2/ERBB2/MCL1/IL2RA/IL4/MET/VEGFC/EGF/RAF1/MYC/NOS3/COL1A1/CHUK/SPP1/IGF2	32
hsa05162	Measles	22/112	139/8081	9.04e-18	1.52e-16	5.37e-17	GSK3B/CDK2/RELA/IKBKB/AKT1/BCL2/JUN/CASP3/MAPK8/STAT1/CCND1/BCL2L1/CASP9/CDK4/TP53/NFKBIA/IL2RA/FOS/CASP8/IL1B/IL1A/CHUK	22
hsa05222	Small cell lung cancer	19/112	92/8081	1.02e-17	1.6e-16	5.65e-17	NOS2/PTGS2/CDK2/RELA/IKBKB/AKT1/BCL2/CASP3/CCND1/BCL2L1/CDKN1A/CASP9/RB1/CDK4/TP53/NFKBIA/XIAP/MYC/CHUK	19
hsa04210	Apoptosis	21/112	136/8081	9.2e-17	1.35e-15	4.78e-16	RELA/IKBKB/AKT1/BCL2/JUN/CASP3/MAPK8/BCL2L1/CASP9/MAPK1/TP53/NFKBIA/MCL1/BIRC5/XIAP/FOS/CASP8/RAF1/PARP1/CHUK/CTSD	21
hsa05205	Proteoglycans in cancer	24/112	205/8081	3.22e-16	4.45e-15	1.57e-15	KDR/ESR1/MAPK14/AKT1/CASP3/PLAU/EGFR/VEGFA/CCND1/CDKN1A/MMP2/MMP9/MAPK1/TP53/MDM2/ERBB2/MET/HIF1A/RAF1/CAV1/MYC/PRKCB/COL1A1/IGF2	24
hsa05145	Toxoplasmosis	19/112	112/8081	5.01e-16	6.54e-15	2.31e-15	NOS2/MAPK14/RELA/IKBKB/AKT1/BCL2/CASP3/MAPK8/STAT1/ALOX5/BCL2L1/CASP9/MAPK1/NFKBIA/IFNG/XIAP/CD40LG/CASP8/CHUK	19
hsa05210	Colorectal cancer	17/112	86/8081	1.33e-15	1.65e-14	5.84e-15	GSK3B/AKT1/BCL2/JUN/CASP3/MAPK8/EGFR/CCND1/CDKN1A/CASP9/MAPK1/TP53/BIRC5/FOS/EGF/RAF1/MYC	17
hsa05169	Epstein-Barr virus infection	23/112	202/8081	2.69e-15	3.16e-14	1.12e-14	MAPK14/CDK2/RELA/IKBKB/AKT1/BCL2/JUN/CASP3/MAPK8/STAT1/ICAM1/CCND1/CDKN1A/CASP9/RB1/CDK4/TP53/NFKBIA/MDM2/CASP8/MYC/CXCL10/CHUK	23
hsa04926	Relaxin signaling pathway	19/112	129/8081	7.61e-15	8.51e-14	3.01e-14	NOS2/MAPK14/RELA/AKT1/JUN/MAPK8/MMP1/EGFR/VEGFA/MMP2/MMP9/MAPK1/NFKBIA/VEGFC/FOS/RAF1/NOS3/COL1A1/COL3A1	19
hsa05142	Chagas disease	17/112	102/8081	2.69e-14	2.87e-13	1.02e-13	NOS2/MAPK14/RELA/IKBKB/AKT1/JUN/MAPK8/MAPK1/NFKBIA/IFNG/FOS/CASP8/IL1B/CCL2/CXCL8/SERPINE1/CHUK	17
hsa04064	NF-kappa B signaling pathway	17/112	104/8081	3.76e-14	3.68e-13	1.3e-13	PTGS2/RELA/IKBKB/BCL2/ICAM1/VCAM1/PLAU/BCL2L1/NFKBIA/XIAP/CD40LG/IL1B/CXCL8/PRKCB/PARP1/CXCL2/CHUK	17
hsa04620	Toll-like receptor signaling pathway	17/112	104/8081	3.76e-14	3.68e-13	1.3e-13	MAPK14/RELA/IKBKB/AKT1/JUN/MAPK8/STAT1/MAPK1/NFKBIA/FOS/CASP8/IL1B/CXCL8/CXCL11/CXCL10/CHUK/SPP1	17
hsa05220	Chronic myeloid leukemia	15/112	76/8081	7.22e-14	6.78e-13	2.4e-13	RELA/IKBKB/AKT1/CCND1/BCL2L1/CDKN1A/MAPK1/RB1/CDK4/TP53/NFKBIA/MDM2/RAF1/MYC/CHUK	15
hsa04066	HIF-1 signaling pathway	17/112	109/8081	8.45e-14	7.64e-13	2.7e-13	NOS2/RELA/AKT1/BCL2/HMOX1/EGFR/VEGFA/CDKN1A/MAPK1/IL6R/ERBB2/IFNG/HIF1A/EGF/PRKCB/NOS3/SERPINE1	17
hsa05140	Leishmaniasis	15/112	77/8081	8.86e-14	7.71e-13	2.73e-13	NOS2/PTGS2/MAPK14/RELA/NCF1/JUN/STAT1/MAPK1/NFKBIA/IFNG/IL4/FOS/IL1B/PRKCB/IL1A	15
hsa05164	Influenza A	20/112	171/8081	1.29e-13	1.08e-12	3.84e-13	RELA/IKBKB/AKT1/CASP3/STAT1/ICAM1/CASP9/MAPK1/CDK4/NFKBIA/IFNG/CASP8/RAF1/IL1B/CCL2/CXCL8/PRKCB/IL1A/CXCL10/CHUK	20
hsa04010	MAPK signaling pathway	25/112	294/8081	1.34e-13	1.08e-12	3.84e-13	KDR/MAPK14/RELA/IKBKB/AKT1/JUN/CASP3/MAPK8/EGFR/VEGFA/MAPK1/TP53/ERBB2/MET/VEGFC/FOS/EGF/RAF1/MYC/IL1B/PRKCB/HSPB1/IL1A/CHUK/IGF2	25
hsa04660	T cell receptor signaling pathway	16/112	104/8081	6e-13	4.7e-12	1.66e-12	MAPK14/GSK3B/RELA/IKBKB/AKT1/JUN/MAPK8/MAPK1/CDK4/NFKBIA/IFNG/IL4/CD40LG/FOS/RAF1/CHUK	16
hsa05223	Non-small cell lung cancer	14/112	72/8081	6.44e-13	4.88e-12	1.73e-12	AKT1/EGFR/CCND1/CDKN1A/CASP9/MAPK1/RB1/CDK4/TP53/ERBB2/MET/EGF/RAF1/PRKCB	14
hsa01524	Platinum drug resistance	14/112	73/8081	7.88e-13	5.61e-12	1.99e-12	AKT1/BCL2/CASP3/GSTP1/BCL2L1/CDKN1A/CASP9/MAPK1/TP53/MDM2/ERBB2/BIRC5/XIAP/CASP8	14
hsa04115	p53 signaling pathway	14/112	73/8081	7.88e-13	5.61e-12	1.99e-12	CDK2/BCL2/CASP3/CDK1/CCND1/BCL2L1/CDKN1A/CASP9/CDK4/TP53/MDM2/CASP8/SERPINE1/IGFBP3	14
hsa05235	PD-L1 expression and PD-1 checkpoint pathway in cancer	15/112	89/8081	8.36e-13	5.78e-12	2.05e-12	MAPK14/RELA/IKBKB/AKT1/JUN/STAT1/EGFR/MAPK1/NFKBIA/IFNG/HIF1A/FOS/EGF/RAF1/CHUK	15
hsa04659	Th17 cell differentiation	16/112	107/8081	9.47e-13	6.36e-12	2.25e-12	MAPK14/RELA/IKBKB/JUN/MAPK8/STAT1/MAPK1/IL6R/NFKBIA/IL2RA/IFNG/IL4/HIF1A/FOS/IL1B/CHUK	16
hsa05225	Hepatocellular carcinoma	19/112	168/8081	1.04e-12	6.81e-12	2.41e-12	GSK3B/AKT1/HMOX1/GSTP1/EGFR/CCND1/BCL2L1/CDKN1A/MAPK1/RB1/CDK4/TP53/MET/RAF1/MYC/PRKCB/NFE2L2/NQO1/IGF2	19
hsa05224	Breast cancer	18/112	147/8081	1.1e-12	6.99e-12	2.47e-12	ESR2/ESR1/GSK3B/PGR/AKT1/JUN/EGFR/CCND1/CDKN1A/MAPK1/RB1/CDK4/TP53/ERBB2/FOS/EGF/RAF1/MYC	18
hsa01521	EGFR tyrosine kinase inhibitor resistance	14/112	79/8081	2.48e-12	1.53e-11	5.42e-12	KDR/GSK3B/AKT1/BCL2/EGFR/VEGFA/BCL2L1/MAPK1/IL6R/ERBB2/MET/EGF/RAF1/PRKCB	14
hsa04510	Focal adhesion	20/112	201/8081	2.81e-12	1.69e-11	5.99e-12	KDR/GSK3B/AKT1/BCL2/JUN/MAPK8/EGFR/VEGFA/CCND1/MAPK1/ERBB2/XIAP/MET/VEGFC/EGF/RAF1/CAV1/PRKCB/COL1A1/SPP1	20
hsa04218	Cellular senescence	18/112	156/8081	3.09e-12	1.82e-11	6.43e-12	MAPK14/CDK2/RELA/AKT1/CDK1/CCND1/CDKN1A/MAPK1/RB1/CDK4/TP53/MDM2/RAF1/MYC/CXCL8/SERPINE1/IL1A/IGFBP3	18
hsa04625	C-type lectin receptor signaling pathway	15/112	104/8081	8.81e-12	5.05e-11	1.79e-11	PTGS2/MAPK14/RELA/IKBKB/AKT1/JUN/MAPK8/STAT1/MAPK1/NFKBIA/MDM2/CASP8/RAF1/IL1B/CHUK	15
hsa05166	Human T-cell leukemia virus 1 infection	20/112	219/8081	1.39e-11	7.77e-11	2.75e-11	CDK2/RELA/IKBKB/AKT1/JUN/MAPK8/ICAM1/CCND1/BCL2L1/CDKN1A/MAPK1/RB1/CDK4/TP53/NFKBIA/IL2RA/XIAP/FOS/MYC/CHUK	20
hsa05213	Endometrial cancer	12/112	58/8081	1.44e-11	7.89e-11	2.79e-11	GSK3B/AKT1/EGFR/CCND1/CDKN1A/CASP9/MAPK1/TP53/ERBB2/EGF/RAF1/MYC	12
hsa04380	Osteoclast differentiation	16/112	128/8081	1.61e-11	8.58e-11	3.04e-11	PPARG/MAPK14/RELA/NCF1/IKBKB/AKT1/JUN/MAPK8/STAT1/MAPK1/NFKBIA/IFNG/FOS/IL1B/IL1A/CHUK	16
hsa05165	Human papillomavirus infection	23/112	331/8081	9.51e-11	4.97e-10	1.76e-10	PTGS2/GSK3B/CDK2/RELA/IKBKB/AKT1/CASP3/STAT1/EGFR/VEGFA/CCND1/CDKN1A/MAPK1/RB1/CDK4/TP53/MDM2/EGF/CASP8/RAF1/COL1A1/CHUK/SPP1	23
hsa04917	Prolactin signaling pathway	12/112	70/8081	1.5e-10	7.5e-10	2.65e-10	ESR2/ESR1/MAPK14/GSK3B/RELA/AKT1/MAPK8/STAT1/CCND1/MAPK1/FOS/RAF1	12
hsa05120	Epithelial cell signaling in Helicobacter pylori infection	12/112	70/8081	1.5e-10	7.5e-10	2.65e-10	MAPK14/RELA/IKBKB/JUN/CASP3/MAPK8/EGFR/NFKBIA/MET/CXCL8/CXCL2/CHUK	12
hsa05226	Gastric cancer	16/112	149/8081	1.66e-10	8.12e-10	2.87e-10	GSK3B/CDK2/AKT1/BCL2/EGFR/CCND1/CDKN1A/MAPK1/RB1/TP53/ERBB2/MET/ABCB1/EGF/RAF1/MYC	16
hsa05218	Melanoma	12/112	72/8081	2.12e-10	1.02e-09	3.59e-10	AKT1/EGFR/CCND1/CDKN1A/MAPK1/RB1/CDK4/TP53/MDM2/MET/EGF/RAF1	12
hsa04658	Th1 and Th2 cell differentiation	13/112	92/8081	3.07e-10	1.44e-09	5.11e-10	MAPK14/RELA/IKBKB/JUN/MAPK8/STAT1/MAPK1/NFKBIA/IL2RA/IFNG/IL4/FOS/CHUK	13
hsa05171	Coronavirus disease - COVID-19	19/112	232/8081	3.17e-10	1.46e-09	5.17e-10	MAPK14/RELA/IKBKB/JUN/MAPK8/MMP1/STAT1/EGFR/MAPK1/IL6R/NFKBIA/MMP3/FOS/IL1B/CCL2/CXCL8/PRKCB/CXCL10/CHUK	19
hsa05214	Glioma	12/112	75/8081	3.48e-10	1.55e-09	5.49e-10	AKT1/EGFR/CCND1/CDKN1A/MAPK1/RB1/CDK4/TP53/MDM2/EGF/RAF1/PRKCB	12
hsa04370	VEGF signaling pathway	11/112	59/8081	3.53e-10	1.55e-09	5.49e-10	PTGS2/KDR/MAPK14/AKT1/VEGFA/CASP9/MAPK1/RAF1/PRKCB/NOS3/HSPB1	11
hsa04621	NOD-like receptor signaling pathway	17/112	181/8081	3.57e-10	1.55e-09	5.49e-10	MAPK14/RELA/IKBKB/BCL2/JUN/MAPK8/STAT1/BCL2L1/MAPK1/NFKBIA/XIAP/CASP8/IL1B/CCL2/CXCL8/CXCL2/CHUK	17
hsa05170	Human immunodeficiency virus 1 infection	18/112	212/8081	5.43e-10	2.32e-09	8.21e-10	MAPK14/RELA/IKBKB/AKT1/BCL2/JUN/CASP3/MAPK8/CDK1/BCL2L1/CASP9/MAPK1/NFKBIA/FOS/CASP8/RAF1/PRKCB/CHUK	18
hsa05202	Transcriptional misregulation in cancer	17/112	192/8081	8.99e-10	3.77e-09	1.33e-09	PPARG/RELA/PLAU/BCL2L1/CDKN1A/MMP9/TP53/MDM2/MET/MMP3/RUNX1T1/MYC/CXCL8/PLAT/MPO/RUNX2/IGFBP3	17
hsa05206	MicroRNAs in cancer	21/112	310/8081	1.12e-09	4.62e-09	1.64e-09	PTGS2/IKBKB/BCL2/CASP3/HMOX1/PLAU/EGFR/VEGFA/CCND1/CDKN1A/MMP9/MAPK1/TP53/MDM2/ERBB2/MCL1/MET/ABCB1/RAF1/MYC/PRKCB	21
hsa04012	ErbB signaling pathway	12/112	85/8081	1.56e-09	6.32e-09	2.24e-09	GSK3B/AKT1/JUN/MAPK8/EGFR/CDKN1A/MAPK1/ERBB2/EGF/RAF1/MYC/PRKCB	12
hsa04068	FoxO signaling pathway	14/112	131/8081	2.68e-09	1.07e-08	3.78e-09	MAPK14/CDK2/IKBKB/AKT1/MAPK8/EGFR/CCND1/CDKN1A/MAPK1/MDM2/SOD2/EGF/RAF1/CHUK	14
hsa05152	Tuberculosis	16/112	180/8081	2.78e-09	1.09e-08	3.85e-09	NOS2/MAPK14/RELA/AKT1/BCL2/CASP3/MAPK8/STAT1/CASP9/MAPK1/IFNG/CASP8/RAF1/IL1B/IL1A/CTSD	16
hsa05323	Rheumatoid arthritis	12/112	93/8081	4.5e-09	1.74e-08	6.14e-09	JUN/MMP1/ICAM1/VEGFA/IFNG/MMP3/FOS/IL1B/CCL2/CXCL8/IL1A/CXCL2	12
hsa05135	Yersinia infection	14/112	137/8081	4.84e-09	1.84e-08	6.5e-09	MAPK14/GSK3B/RELA/IKBKB/AKT1/JUN/MAPK8/MAPK1/NFKBIA/FOS/IL1B/CCL2/CXCL8/CHUK	14
hsa04630	JAK-STAT signaling pathway	15/112	162/8081	5.18e-09	1.93e-08	6.84e-09	AKT1/BCL2/STAT1/EGFR/CCND1/BCL2L1/CDKN1A/IL6R/MCL1/IL2RA/IFNG/IL4/EGF/RAF1/MYC	15
hsa04915	Estrogen signaling pathway	14/112	138/8081	5.33e-09	1.96e-08	6.93e-09	ESR2/ESR1/PGR/AKT1/BCL2/JUN/EGFR/MMP2/MMP9/MAPK1/FOS/RAF1/NOS3/CTSD	14
hsa05133	Pertussis	11/112	76/8081	5.94e-09	2.15e-08	7.6e-09	NOS2/MAPK14/RELA/JUN/CASP3/MAPK8/MAPK1/FOS/IL1B/CXCL8/IL1A	11
hsa04062	Chemokine signaling pathway	16/112	192/8081	7.12e-09	2.53e-08	8.97e-09	GSK3B/RELA/NCF1/IKBKB/AKT1/STAT1/MAPK1/NFKBIA/RAF1/CCL2/CXCL8/PRKCB/CXCL11/CXCL2/CXCL10/CHUK	16
hsa04215	Apoptosis - multiple species	8/112	32/8081	8.44e-09	2.96e-08	1.05e-08	BCL2/CASP3/MAPK8/BCL2L1/CASP9/BIRC5/XIAP/CASP8	8
hsa04919	Thyroid hormone signaling pathway	13/112	121/8081	9.67e-09	3.34e-08	1.18e-08	ESR1/GSK3B/AKT1/STAT1/CCND1/CASP9/MAPK1/TP53/MDM2/HIF1A/RAF1/MYC/PRKCB	13
hsa04662	B cell receptor signaling pathway	11/112	82/8081	1.36e-08	4.62e-08	1.63e-08	GSK3B/RELA/IKBKB/AKT1/JUN/MAPK1/NFKBIA/FOS/RAF1/PRKCB/CHUK	11
hsa05144	Malaria	9/112	50/8081	2.13e-08	7.14e-08	2.53e-08	ICAM1/SELE/VCAM1/IFNG/CD40LG/MET/IL1B/CCL2/CXCL8	9
hsa05221	Acute myeloid leukemia	10/112	67/8081	2.23e-08	7.39e-08	2.61e-08	RELA/IKBKB/AKT1/CCND1/MAPK1/RAF1/RUNX1T1/MYC/MPO/CHUK	10
hsa05131	Shigellosis	17/112	246/8081	3.87e-08	1.26e-07	4.47e-08	MAPK14/GSK3B/RELA/IKBKB/AKT1/BCL2/JUN/MAPK8/EGFR/BCL2L1/MAPK1/TP53/NFKBIA/MDM2/IL1B/CXCL8/CHUK	17
hsa05132	Salmonella infection	17/112	249/8081	4.63e-08	1.49e-07	5.28e-08	MAPK14/RELA/IKBKB/AKT1/BCL2/JUN/CASP3/MAPK8/MAPK1/NFKBIA/FOS/CASP8/RAF1/MYC/IL1B/CXCL8/CHUK	17
hsa05130	Pathogenic Escherichia coli infection	15/112	197/8081	7.37e-08	2.34e-07	8.28e-08	MAPK14/RELA/IKBKB/JUN/CASP3/MAPK8/CASP9/MAPK1/NFKBIA/FOS/CASP8/IL1B/CXCL8/CLDN4/CHUK	15
hsa04722	Neurotrophin signaling pathway	12/112	119/8081	7.6e-08	2.38e-07	8.43e-08	MAPK14/GSK3B/RELA/IKBKB/AKT1/BCL2/JUN/MAPK8/MAPK1/TP53/NFKBIA/RAF1	12
hsa04014	Ras signaling pathway	16/112	232/8081	1.04e-07	3.22e-07	1.14e-07	KDR/RELA/IKBKB/AKT1/MAPK8/EGFR/VEGFA/BCL2L1/MAPK1/MET/VEGFC/EGF/RAF1/PRKCB/CHUK/IGF2	16
hsa04932	Non-alcoholic fatty liver disease	13/112	150/8081	1.29e-07	3.94e-07	1.39e-07	GSK3B/RELA/IKBKB/AKT1/JUN/CASP3/MAPK8/IL6R/FOS/CASP8/IL1B/CXCL8/IL1A	13
hsa05146	Amoebiasis	11/112	102/8081	1.37e-07	4.12e-07	1.46e-07	NOS2/RELA/CASP3/IFNG/IL1B/CXCL8/PRKCB/HSPB1/COL1A1/COL3A1/CXCL2	11
hsa04622	RIG-I-like receptor signaling pathway	9/112	70/8081	4.38e-07	1.29e-06	4.56e-07	MAPK14/RELA/IKBKB/MAPK8/NFKBIA/CASP8/CXCL8/CXCL10/CHUK	9
hsa05230	Central carbon metabolism in cancer	9/112	70/8081	4.38e-07	1.29e-06	4.56e-07	AKT1/EGFR/MAPK1/TP53/ERBB2/MET/HIF1A/RAF1/MYC	9
hsa04071	Sphingolipid signaling pathway	11/112	119/8081	6.65e-07	1.93e-06	6.83e-07	MAPK14/RELA/AKT1/BCL2/MAPK8/MAPK1/TP53/RAF1/PRKCB/NOS3/CTSD	11
hsa05203	Viral carcinogenesis	14/112	204/8081	7.44e-07	2.13e-06	7.54e-07	CDK2/RELA/JUN/CASP3/CDK1/CCND1/CDKN1A/MAPK1/RB1/CDK4/TP53/NFKBIA/MDM2/CASP8	14
hsa05231	Choline metabolism in cancer	10/112	98/8081	8.81e-07	2.49e-06	8.82e-07	AKT1/JUN/MAPK8/EGFR/MAPK1/HIF1A/FOS/EGF/RAF1/PRKCB	10
hsa05134	Legionellosis	8/112	57/8081	9.95e-07	2.78e-06	9.85e-07	RELA/CASP3/CASP9/NFKBIA/CASP8/IL1B/CXCL8/CXCL2	8
hsa05211	Renal cell carcinoma	8/112	69/8081	4.39e-06	1.21e-05	4.29e-06	AKT1/JUN/VEGFA/CDKN1A/MAPK1/MET/HIF1A/RAF1	8
hsa04935	Growth hormone synthesis, secretion and action	10/112	119/8081	5.25e-06	1.43e-05	5.07e-06	MAPK14/GSK3B/AKT1/MAPK8/STAT1/MAPK1/FOS/RAF1/PRKCB/IGFBP3	10
hsa05022	Pathways of neurodegeneration - multiple diseases	20/112	475/8081	6.75e-06	1.82e-05	6.45e-06	NOS2/PTGS2/MAPK14/GSK3B/GRIA2/RELA/BCL2/CASP3/MAPK8/BCL2L1/CASP9/MAPK1/APP/CASP8/RAF1/SOD1/HSPA5/IL1B/PRKCB/IL1A	20
hsa04110	Cell cycle	10/112	124/8081	7.6e-06	2.03e-05	7.18e-06	GSK3B/CDK2/CDK1/CCND1/CDKN1A/RB1/CDK4/TP53/MDM2/MYC	10
hsa05143	African trypanosomiasis	6/112	37/8081	1.02e-05	2.65e-05	9.38e-06	ICAM1/SELE/VCAM1/IFNG/IL1B/PRKCB	6
hsa05216	Thyroid cancer	6/112	37/8081	1.02e-05	2.65e-05	9.38e-06	PPARG/CCND1/CDKN1A/MAPK1/TP53/MYC	6
hsa05416	Viral myocarditis	7/112	60/8081	1.72e-05	4.43e-05	1.57e-05	CASP3/ICAM1/CCND1/CASP9/CD40LG/CASP8/CAV1	7
hsa04726	Serotonergic synapse	9/112	115/8081	2.82e-05	7.2e-05	2.55e-05	PTGS2/PTGS1/CASP3/ALOX5/MAOA/MAPK1/APP/RAF1/PRKCB	9
hsa05321	Inflammatory bowel disease	7/112	65/8081	2.92e-05	7.38e-05	2.61e-05	RELA/JUN/STAT1/IFNG/IL4/IL1B/IL1A	7
hsa04664	Fc epsilon RI signaling pathway	7/112	68/8081	3.93e-05	9.83e-05	3.48e-05	MAPK14/AKT1/MAPK8/ALOX5/MAPK1/IL4/RAF1	7
hsa04912	GnRH signaling pathway	8/112	93/8081	4.06e-05	0.000100308	3.55e-05	MAPK14/JUN/MAPK8/EGFR/MMP2/MAPK1/RAF1/PRKCB	8
hsa05010	Alzheimer disease	16/112	369/8081	4.42e-05	0.00010827	3.83e-05	NOS2/PTGS2/GSK3B/RELA/IKBKB/AKT1/CASP3/MAPK8/CASP9/MAPK1/APP/CASP8/RAF1/IL1B/IL1A/CHUK	16
hsa04921	Oxytocin signaling pathway	10/112	154/8081	5.05e-05	0.000122304	4.33e-05	PTGS2/JUN/EGFR/CCND1/CDKN1A/MAPK1/FOS/RAF1/PRKCB/NOS3	10
hsa04914	Progesterone-mediated oocyte maturation	8/112	100/8081	6.84e-05	0.00016397	5.8e-05	MAPK14/CDK2/PGR/AKT1/MAPK8/CDK1/MAPK1/RAF1	8
hsa04928	Parathyroid hormone synthesis, secretion and action	8/112	106/8081	0.000103452	0.000245568	8.69e-05	BCL2/EGFR/CDKN1A/MAPK1/FOS/RAF1/PRKCB/RUNX2	8
hsa04371	Apelin signaling pathway	9/112	137/8081	0.000111477	0.00026197	9.27e-05	NOS2/AKT1/CCND1/MAPK1/RAF1/NOS3/PLAT/SERPINE1/SPP1	9
hsa04020	Calcium signaling pathway	12/112	240/8081	0.000113835	0.000264863	9.37e-05	NOS2/KDR/ADRB2/EGFR/VEGFA/ERBB2/MET/VEGFC/EGF/PTGER3/PRKCB/NOS3	12
hsa04931	Insulin resistance	8/112	108/8081	0.000118021	0.000271911	9.62e-05	GSK3B/RELA/IKBKB/AKT1/MAPK8/NFKBIA/PRKCB/NOS3	8
hsa04015	Rap1 signaling pathway	11/112	210/8081	0.000147951	0.000337559	0.00011945	KDR/MAPK14/AKT1/EGFR/VEGFA/MAPK1/MET/VEGFC/EGF/RAF1/PRKCB	11
hsa04670	Leukocyte transendothelial migration	8/112	114/8081	0.000172252	0.000389223	0.000137732	MAPK14/NCF1/ICAM1/VCAM1/MMP2/MMP9/PRKCB/CLDN4	8
hsa04024	cAMP signaling pathway	11/112	216/8081	0.000189585	0.00042431	0.000150148	GRIA2/RELA/AKT1/JUN/MAPK8/ADRB2/MAPK1/NFKBIA/FOS/RAF1/PTGER3	11
hsa04540	Gap junction	7/112	88/8081	0.000205021	0.000454527	0.00016084	CDK1/EGFR/MAPK1/EGF/RAF1/GJA1/PRKCB	7
hsa04623	Cytosolic DNA-sensing pathway	6/112	63/8081	0.000221484	0.000486436	0.000172132	RELA/IKBKB/NFKBIA/IL1B/CXCL10/CHUK	6
hsa04929	GnRH secretion	6/112	64/8081	0.000241669	0.000525854	0.00018608	ESR2/AKT1/MAPK1/RAF1/PRKCB/SPP1	6
hsa04137	Mitophagy - animal	6/112	68/8081	0.000337329	0.000727269	0.000257354	RELA/JUN/MAPK8/BCL2L1/TP53/HIF1A	6
hsa04217	Necroptosis	9/112	159/8081	0.000343331	0.00073348	0.000259552	BCL2/MAPK8/STAT1/IFNG/XIAP/CASP8/IL1B/IL1A/PARP1	9
hsa04920	Adipocytokine signaling pathway	6/112	69/8081	0.000365337	0.000773461	0.0002737	RELA/IKBKB/AKT1/MAPK8/NFKBIA/CHUK	6
hsa05020	Prion disease	12/112	273/8081	0.000377162	0.000791366	0.000280035	MAPK14/GSK3B/NCF1/CASP3/MAPK8/CASP9/MAPK1/SOD1/HSPA5/CAV1/IL1B/IL1A	12
hsa04061	Viral protein interaction with cytokine and cytokine receptor	7/112	100/8081	0.000451132	0.000938196	0.000331993	IL6R/IL2RA/CCL2/CXCL8/CXCL11/CXCL2/CXCL10	7
hsa04728	Dopaminergic synapse	8/112	132/8081	0.000469046	0.000966894	0.000342148	MAPK14/GSK3B/GRIA2/AKT1/MAPK8/MAOA/FOS/PRKCB	8
hsa04140	Autophagy - animal	8/112	137/8081	0.000601245	0.00122863	0.000434768	AKT1/BCL2/MAPK8/BCL2L1/MAPK1/HIF1A/RAF1/CTSD	8
hsa04060	Cytokine-cytokine receptor interaction	12/112	295/8081	0.000754705	0.00152893	0.000541031	IL6R/IL2RA/IFNG/IL4/CD40LG/IL1B/CCL2/CXCL8/IL1A/CXCL11/CXCL2/CXCL10	12
hsa01523	Antifolate resistance	4/112	31/8081	0.000824388	0.00165582	0.000585935	RELA/IKBKB/IL1B/CHUK	4
hsa04923	Regulation of lipolysis in adipocytes	5/112	57/8081	0.00110318	0.00219702	0.000777444	PTGS2/PTGS1/AKT1/ADRB2/PTGER3	5
hsa04610	Complement and coagulation cascades	6/112	85/8081	0.00111431	0.00220053	0.000778686	F7/PLAU/F3/PLAT/THBD/SERPINE1	6
hsa04934	Cushing syndrome	8/112	155/8081	0.00134685	0.00263758	0.000933342	GSK3B/CDK2/EGFR/CCND1/CDKN1A/MAPK1/RB1/CDK4	8
hsa04611	Platelet activation	7/112	124/8081	0.0016165	0.00313948	0.00111095	PTGS1/MAPK14/AKT1/MAPK1/NOS3/COL1A1/COL3A1	7
hsa05031	Amphetamine addiction	5/112	69/8081	0.00259646	0.00500137	0.0017698	GRIA2/JUN/MAOA/FOS/PRKCB	5
hsa05168	Herpes simplex virus 1 infection	15/112	498/8081	0.00349159	0.00667093	0.0023606	RELA/IKBKB/AKT1/BCL2/CASP3/STAT1/BCL2L1/CASP9/TP53/NFKBIA/IFNG/CASP8/IL1B/CCL2/CHUK	15
hsa04723	Retrograde endocannabinoid signaling	7/112	148/8081	0.00437631	0.00829381	0.00293488	PTGS2/MAPK14/GABRA1/GRIA2/MAPK8/MAPK1/PRKCB	7
hsa05030	Cocaine addiction	4/112	49/8081	0.0045859	0.00862149	0.00305083	GRIA2/RELA/JUN/MAOA	4
hsa00330	Arginine and proline metabolism	4/112	51/8081	0.00529576	0.00987701	0.00349511	NOS2/MAOA/ODC1/NOS3	4
hsa04150	mTOR signaling pathway	7/112	155/8081	0.00562627	0.0104108	0.003684	GSK3B/IKBKB/AKT1/MAPK1/RAF1/PRKCB/CHUK	7
hsa04310	Wnt signaling pathway	7/112	160/8081	0.00667103	0.0122476	0.00433398	GSK3B/JUN/MAPK8/CCND1/TP53/MYC/PRKCB	7
hsa04211	Longevity regulating pathway	5/112	89/8081	0.00771122	0.0140476	0.00497092	PPARG/RELA/AKT1/TP53/SOD2	5
hsa04114	Oocyte meiosis	6/112	129/8081	0.00888129	0.0160546	0.00568115	AR/MAPK14/CDK2/PGR/CDK1/MAPK1	6
hsa04730	Long-term depression	4/112	60/8081	0.0093981	0.0168592	0.00596585	GRIA2/MAPK1/RAF1/PRKCB	4
hsa04650	Natural killer cell mediated cytotoxicity	6/112	131/8081	0.00954418	0.0169915	0.00601268	CASP3/ICAM1/MAPK1/IFNG/RAF1/PRKCB	6
hsa00590	Arachidonic acid metabolism	4/112	61/8081	0.00995234	0.017585	0.00622267	PTGS2/PTGS1/ALOX5/PTGES	4
hsa04666	Fc gamma R-mediated phagocytosis	5/112	97/8081	0.0109768	0.0192504	0.00681201	NCF1/AKT1/MAPK1/RAF1/PRKCB	5
hsa04910	Insulin signaling pathway	6/112	137/8081	0.0117446	0.0204443	0.0072345	GSK3B/IKBKB/AKT1/MAPK8/MAPK1/RAF1	6
hsa04640	Hematopoietic cell lineage	5/112	99/8081	0.011921	0.0205988	0.00728916	IL6R/IL2RA/IL4/IL1B/IL1A	5
hsa04916	Melanogenesis	5/112	101/8081	0.0129191	0.0221604	0.00784177	GSK3B/MAPK1/TYR/RAF1/PRKCB	5
hsa04720	Long-term potentiation	4/112	67/8081	0.0137246	0.0233715	0.00827034	GRIA2/MAPK1/RAF1/PRKCB	4
hsa04550	Signaling pathways regulating pluripotency of stem cells	6/112	143/8081	0.0142819	0.0241456	0.00854425	MAPK14/GSK3B/AKT1/MAPK1/RAF1/MYC	6
hsa05330	Allograft rejection	3/112	38/8081	0.0153751	0.0258082	0.00913258	IFNG/IL4/CD40LG	3
hsa04072	Phospholipase D signaling pathway	6/112	148/8081	0.0166707	0.0276102	0.00977023	AKT1/EGFR/MAPK1/EGF/RAF1/CXCL8	6
hsa04520	Adherens junction	4/112	71/8081	0.0166836	0.0276102	0.00977023	EGFR/MAPK1/ERBB2/MET	4
hsa04261	Adrenergic signaling in cardiomyocytes	6/112	150/8081	0.0176992	0.0290861	0.0102925	SCN5A/MAPK14/AKT1/BCL2/ADRB2/MAPK1	6
hsa05332	Graft-versus-host disease	3/112	42/8081	0.0201073	0.0325905	0.0115326	IFNG/IL1B/IL1A	3
hsa04725	Cholinergic synapse	5/112	113/8081	0.020109	0.0325905	0.0115326	AKT1/BCL2/MAPK1/FOS/PRKCB	5
hsa04940	Type I diabetes mellitus	3/112	43/8081	0.0214018	0.0344482	0.0121899	IFNG/IL1B/IL1A	3
hsa05012	Parkinson disease	8/112	249/8081	0.0220355	0.0352268	0.0124655	CASP3/MAPK8/MAOA/BCL2L1/CASP9/TP53/HSPA5/NFE2L2	8
hsa04930	Type II diabetes mellitus	3/112	46/8081	0.025554	0.0405756	0.0143582	IKBKB/MAPK8/MAPK1	3
hsa05016	Huntington disease	9/112	306/8081	0.0258522	0.0407737	0.0144283	PPARG/GRIA2/CASP3/MAPK8/CASP9/TP53/SOD2/CASP8/SOD1	9
hsa05014	Amyotrophic lateral sclerosis	10/112	364/8081	0.0291522	0.0456718	0.0161616	NOS2/MAPK14/GRIA2/BCL2/CASP3/BCL2L1/CASP9/TP53/SOD1/HSPA5	10
hsa04530	Tight junction	6/112	169/8081	0.0297145	0.0462444	0.0163642	JUN/MAPK8/CCND1/CDK4/ERBB2/CLDN4	6
hsa04340	Hedgehog signaling pathway	3/112	50/8081	0.0317151	0.0490332	0.0173511	GSK3B/BCL2/CCND1	3
hsa04913	Ovarian steroidogenesis	3/112	51/8081	0.0333663	0.0512489	0.0181351	PTGS2/CYP1A1/ALOX5	3
hsa00220	Arginine biosynthesis	2/112	22/8081	0.0367182	0.056031	0.0198273	NOS2/NOS3	2
hsa04713	Circadian entrainment	4/112	97/8081	0.045385	0.0688096	0.0243492	GRIA2/MAPK1/FOS/PRKCB	4
hsa04750	Inflammatory mediator regulation of TRP channels	4/112	98/8081	0.0468294	0.0705443	0.024963	MAPK14/MAPK8/IL1B/PRKCB	4
